# Supplementary material for: Comparative effectiveness of nonpharmacological interventions in reducing psychological symptoms among patients with chronic low back pain
Source: PubMed Central journal article supplement (PMC10793751; doi:10.1097/js9.0000000000000798), 2023-09-26

## Content

|                                                                                                                                                                   |     |
|-------------------------------------------------------------------------------------------------------------------------------------------------------------------|-----|
| <b>Appendix 1.</b> Search terms and database search results.....                                                                                                  | 1   |
| <b>Appendix 2.</b> Main characteristics of included randomized controlled trials.....                                                                             | 5   |
| <b>Appendix 3.</b> Coding guide and description of different interventions.....                                                                                   | 10  |
| <b>Appendix 4.</b> Summary of risk of bias assessment using Risk of bias 2 on included randomized controlled trials.....                                          | 13  |
| <b>Appendix 5.</b> Detailed results of each domain on risk of bias assessment using Risk of bias 2 on included randomized controlled trials.....                  | 17  |
| <b>Appendix 6.</b> Detailed information of each trial for the risk of bias assessment.....                                                                        | 20  |
| <b>Appendix 7.</b> Certainty of evidence ratings on direct evidence of different categories of interventions for depression, anxiety, and mental health.....      | 86  |
| <b>Appendix 8.</b> Certainty of evidence ratings on direct evidence of different specific treatments for depression, anxiety, and mental health.....              | 88  |
| <b>Appendix 9.</b> Certainty of evidence ratings on indirect and network evidence of different categories of interventions for depression.....                    | 92  |
| <b>Appendix 10.</b> Certainty of evidence ratings on indirect and network evidence of different categories of interventions for anxiety.....                      | 93  |
| <b>Appendix 11.</b> Certainty of evidence ratings on indirect and network evidence of different categories of interventions for mental health.....                | 94  |
| <b>Appendix 12.</b> Certainty of evidence ratings on indirect and network evidence of different specific treatments for depression.....                           | 95  |
| <b>Appendix 13.</b> Certainty of evidence ratings on indirect and network evidence of different specific treatments for anxiety.....                              | 98  |
| <b>Appendix 14.</b> Certainty of evidence ratings on indirect and network evidence of different specific treatments for mental health.....                        | 100 |
| <b>Appendix 15.</b> Pooled standardized mean difference and heterogeneity for each direct comparison of different categories of interventions for depression..... | 101 |
| <b>Appendix 16.</b> Comparative effectiveness of different categories of interventions: surface under the cumulative ranking curves (SUCRA) for depression.....   | 102 |

|                                                                                                                                                                       |     |
|-----------------------------------------------------------------------------------------------------------------------------------------------------------------------|-----|
| <b>Appendix 17.</b> Network plot of subgroup comparisons in the network meta-analysis of specific treatments for depression.....                                      | 103 |
| <b>Appendix 18.</b> Subgroup analysis of comparative effectiveness of specific treatments for depression.....                                                         | 104 |
| <b>Appendix 19.</b> Subgroup analysis of comparative effectiveness of specific treatments: surface under the cumulative ranking curves (SUCRA) for depression.....    | 106 |
| <b>Appendix 20.</b> Pooled standardized mean difference and heterogeneity for each direct comparison of different categories of interventions for anxiety.....        | 107 |
| <b>Appendix 21.</b> Comparative effectiveness of different categories of interventions: surface under the cumulative ranking curves (SUCRA) for anxiety.....          | 108 |
| <b>Appendix 22.</b> Network plot of subgroup comparisons in the network meta-analysis of specific treatments for anxiety.....                                         | 109 |
| <b>Appendix 23.</b> Subgroup analysis of comparative effectiveness of specific treatments for anxiety.....                                                            | 110 |
| <b>Appendix 24.</b> Subgroup analysis of comparative effectiveness of specific treatments: surface under the cumulative ranking curves (SUCRA) for anxiety.....       | 111 |
| <b>Appendix 25.</b> Pooled standardized mean difference and heterogeneity for each direct comparison of different categories of interventions for mental health.....  | 112 |
| <b>Appendix 26.</b> Comparative effectiveness of different categories of interventions: surface under the cumulative ranking curves (SUCRA) for mental health.....    | 113 |
| <b>Appendix 27.</b> Network plot of subgroup comparisons in the network meta-analysis of specific treatments for mental health.....                                   | 114 |
| <b>Appendix 28.</b> Subgroup analysis of comparative effectiveness of specific treatments for mental health.....                                                      | 115 |
| <b>Appendix 29.</b> Subgroup analysis of comparative effectiveness of specific treatments: surface under the cumulative ranking curves (SUCRA) for mental health..... | 116 |
| <b>Appendix 30.</b> Evaluation of global inconsistency for different categories of interventions and specific treatments.....                                         | 117 |
| <b>Appendix 31.</b> Node-splitting method in comparison between direct and indirect evidence of different categories of interventions for depression.....             | 118 |

|                                                                                                                                                                 |     |
|-----------------------------------------------------------------------------------------------------------------------------------------------------------------|-----|
| <b>Appendix 32.</b> Node-splitting method in comparison between direct and indirect evidence of different categories of interventions for anxiety.....          | 119 |
| <b>Appendix 33.</b> Node-splitting method in comparison between direct and indirect evidence of different categories of interventions for mental health.....    | 120 |
| <b>Appendix 34.</b> Subgroup analysis of node-splitting method in comparison between direct and indirect evidence of specific treatments for depression.....    | 121 |
| <b>Appendix 35.</b> Subgroup analysis of node-splitting method in comparison between direct and indirect evidence of specific treatments for anxiety.....       | 122 |
| <b>Appendix 36.</b> Subgroup analysis of node-splitting method in comparison between direct and indirect evidence of specific treatments for mental health..... | 123 |
| <b>Appendix 37.</b> Evaluation of inconsistency using loop-specific heterogeneity estimates of different categories of interventions for depression.....        | 124 |
| <b>Appendix 38.</b> Evaluation of inconsistency using loop-specific heterogeneity estimates of different categories of interventions for anxiety.....           | 125 |
| <b>Appendix 39.</b> Evaluation of inconsistency using loop-specific heterogeneity estimates of different categories of interventions for mental health.....     | 126 |
| <b>Appendix 40.</b> Subgroup analysis of evaluation of inconsistency using loop-specific heterogeneity estimates of specific treatments for depression.....     | 127 |
| <b>Appendix 41.</b> Subgroup analysis of evaluation of inconsistency using loop-specific heterogeneity estimates of specific treatments for anxiety.....        | 129 |
| <b>Appendix 42.</b> Subgroup analysis of evaluation of inconsistency using loop-specific heterogeneity estimates of specific treatments for mental health.....  | 130 |
| <b>Appendix 43.</b> Egger’s test for the assessment of publication bias of pairwise meta-analysis.....                                                          | 131 |
| <b>Appendix 44.</b> Network meta-analysis funnel plots of different categories of interventions for the assessment of publication bias for depression.....      | 132 |
| <b>Appendix 45.</b> Network meta-analysis funnel plots of different categories of interventions for the assessment of publication bias for anxiety.....         | 133 |
| <b>Appendix 46.</b> Network meta-analysis funnel plots of different categories of interventions for the assessment of publication bias for mental health.....   | 134 |

|                                                                                                                                                                  |     |
|------------------------------------------------------------------------------------------------------------------------------------------------------------------|-----|
| <b>Appendix 47.</b> Subgroup analysis of meta-analysis funnel plots of specific treatments for the assessment of publication bias for depression.....            | 135 |
| <b>Appendix 48.</b> Subgroup analysis of network meta-analysis funnel plots of specific treatments for the assessment of publication bias for anxiety.....       | 136 |
| <b>Appendix 49.</b> Subgroup analysis of network meta-analysis funnel plots of specific treatments for the assessment of publication bias for mental health..... | 137 |

**Appendix 1. Search terms and database search results (from database inception to 4 May 2023)**

| <b>Search</b> | <b>Query</b>                                                                                                                                                                                                                                                                                                                                                                                                                                                                                                                                                                                                                                                                                                                                                                                         | <b>Records</b> |
|---------------|------------------------------------------------------------------------------------------------------------------------------------------------------------------------------------------------------------------------------------------------------------------------------------------------------------------------------------------------------------------------------------------------------------------------------------------------------------------------------------------------------------------------------------------------------------------------------------------------------------------------------------------------------------------------------------------------------------------------------------------------------------------------------------------------------|----------------|
| <b>PubMed</b> |                                                                                                                                                                                                                                                                                                                                                                                                                                                                                                                                                                                                                                                                                                                                                                                                      |                |
| #1            | "Back Pain"[MeSH Terms] OR "Low Back Pain"[MeSH Terms] OR "Back Pain"[Title/Abstract] OR "Lumbago"[Title/Abstract] OR "Backache"[Title/Abstract] OR "back ache*"[Title/Abstract] OR "spinal stenosis"[Title/Abstract] OR "Canal Stenosis"[Title/Abstract] OR "Lumbar Stenosis"[Title/Abstract] OR "Lateral Stenosis "[Title/Abstract] OR "Neurogenic Claudication"[Title/Abstract] OR "Radiculopathy"[Title/Abstract] OR "Radicular Pain"[Title/Abstract] OR "Spondylolisthesis"[Title/Abstract] OR "Spondylosis"[Title/Abstract] OR "Sciatica"[Title/Abstract] OR "Intervertebral Disc Displacement"[Title/Abstract] OR "Spinal Nerve Roots"[Title/Abstract] OR "Neurologic Signs"[Title/Abstract] OR "Paresthesia"[Title/Abstract] OR "Paraesthesia"[Title/Abstract] OR "Numbness"[Title/Abstract] | 119,441        |
| #2            | "Randomized Controlled Trial" [Publication Type] OR Randomized[Title/Abstract] OR Randomised[Title/Abstract] OR Randomization[Title/Abstract] OR Randomisation[Title/Abstract]                                                                                                                                                                                                                                                                                                                                                                                                                                                                                                                                                                                                                       | 1,009,563      |
| #3            | "Anxiety"[Mesh] OR anxiety[Title/Abstract] OR Angst[Title/Abstract] OR Nervousness[Title/Abstract] OR Hypervigilance[Title/Abstract] OR Anxiousness[Title/Abstract] OR "Social Anxiety"[Title/Abstract] OR "Social Anxieties"[Title/Abstract]                                                                                                                                                                                                                                                                                                                                                                                                                                                                                                                                                        | 287,998        |
| #4            | "Depression"[Mesh] OR Depression[Title/Abstract] OR "Depressive Symptom"[Title/Abstract] OR "Emotional Depression"[Title/Abstract]                                                                                                                                                                                                                                                                                                                                                                                                                                                                                                                                                                                                                                                                   | 458,489        |
| #5            | "psychology"[Mesh] OR psychology[Title/Abstract] OR "Psychological Side Effect"[Title/Abstract] OR "Psychosocial Factor"[Title/Abstract] OR Psychologist[Title/Abstract]                                                                                                                                                                                                                                                                                                                                                                                                                                                                                                                                                                                                                             | 124,378        |
| #6            | "Mental Health"[Mesh] OR "Mental Health"[Title/Abstract] OR "Mental hygiene"[Title/Abstract]                                                                                                                                                                                                                                                                                                                                                                                                                                                                                                                                                                                                                                                                                                         | 238,489        |

|    |                                                                                                                                                                                                                                                                                                                                    |         |
|----|------------------------------------------------------------------------------------------------------------------------------------------------------------------------------------------------------------------------------------------------------------------------------------------------------------------------------------|---------|
| #7 | "Psychotic Disorders"[Mesh] OR "Psychotic Disorder"[Title/Abstract]<br>OR Psychosis[Title/Abstract] OR Psychoses[Title/Abstract] OR<br>"Schizoaffective Disorder"[Title/Abstract] OR "Schizophreniform<br>Disorder"[Title/Abstract] OR "Brief Reactive Psychoses"[Title/Abstract]<br>OR "Brief Reactive Psychosis"[Title/Abstract] | 87,045  |
| #8 | #3 OR #4 OR #5 OR #6 OR #7                                                                                                                                                                                                                                                                                                         | 961,032 |
| #9 | #1 AND #2 AND #8                                                                                                                                                                                                                                                                                                                   | 899     |

---

### Web of Science

---

|    |                                                                                                                                                                                                                                                                                                                                                                                                                                |           |
|----|--------------------------------------------------------------------------------------------------------------------------------------------------------------------------------------------------------------------------------------------------------------------------------------------------------------------------------------------------------------------------------------------------------------------------------|-----------|
| #1 | TS=("back pain" OR "low back pain" OR lumbago OR backache OR "back<br>ache" OR "spinal stenosis" OR "canal stenosis" OR "lumbar stenosis" OR<br>"lateral stenosis " OR "neurogenic claudication" OR radiculopathy OR<br>"radicular pain" OR spondylolisthesis OR spondylosis OR sciatica OR<br>"intervertebral disc displacement" OR "spinal nerve roots" OR "neurologic<br>signs" OR paresthesia OR paraesthesia OR numbness) | 236,441   |
| #2 | TS=(randomized controlled trial)                                                                                                                                                                                                                                                                                                                                                                                               | 725,392   |
| #3 | TS=(anxiety OR angst OR nervousness OR hypervigilance OR<br>anxiousness OR "social anxiety" OR "social anxieties")                                                                                                                                                                                                                                                                                                             | 555,643   |
| #4 | TS=(depression OR "depressive Symptom" OR "emotional depression")                                                                                                                                                                                                                                                                                                                                                              | 981,681   |
| #5 | TS=(psychology OR "psychological side effect" OR "psychosocial factor"<br>OR psychologist)                                                                                                                                                                                                                                                                                                                                     | 1,914,965 |
| #6 | TS=("mental health" OR "mental hygiene")                                                                                                                                                                                                                                                                                                                                                                                       | 430,370   |
| #7 | TS=("psychotic disorders" OR psychosis OR psychoses OR<br>"schizoaffective disorder" OR "schizophreniform disorder" OR "brief<br>reactive psychoses" OR "brief reactive psychosis")                                                                                                                                                                                                                                            | 147,586   |
| #8 | #1 AND #2 AND (#3 OR #4 OR #5 OR #6 OR #7 )                                                                                                                                                                                                                                                                                                                                                                                    | 2,479     |

---

### EMBASE

---

|    |                                                                                                                                          |         |
|----|------------------------------------------------------------------------------------------------------------------------------------------|---------|
| #1 | 'back pain'/exp OR 'low back pain'/exp OR 'back pain*':ab,ti OR<br>'lumbago':ab,ti OR 'backache*':ab,ti OR 'back ache*':ab,ti OR 'spinal | 210,281 |
|----|------------------------------------------------------------------------------------------------------------------------------------------|---------|

---

|    |                                                                                                                                                                                                                                                                                                                                                                                                                                         |           |
|----|-----------------------------------------------------------------------------------------------------------------------------------------------------------------------------------------------------------------------------------------------------------------------------------------------------------------------------------------------------------------------------------------------------------------------------------------|-----------|
|    | stenosis':ab,ti OR 'canal stenosis':ab,ti OR 'lumbar stenosis':ab,ti OR 'lateral stenosis':ab,ti OR 'neurogenic claudication':ab,ti OR 'radiculopathy':ab,ti OR 'radicular pain':ab,ti OR 'spondylolisthesis':ab,ti OR 'spondylosis':ab,ti OR 'sciatica':ab,ti OR 'intervertebral disc displacement':ab,ti OR 'spinal nerve roots':ab,ti OR 'neurologic signs':ab,ti OR 'paresthesia':ab,ti OR 'paraesthesia':ab,ti OR 'numbness':ab,ti |           |
| #2 | 'randomized controlled trial'/exp OR 'randomized controlled trial':ti,ab OR 'randomized':ti,ab OR 'randomised':ti,ab OR 'randomisation':ti,ab OR 'randomization':ti,ab OR 'rct':ti,ab OR 'randomly':ti,ab OR 'placebo':ti,ab                                                                                                                                                                                                            | 1,800,224 |
| #3 | 'anxiety'/exp OR 'anxiety' OR 'anxiety':ti,ab OR 'angst':ti,ab OR 'nervousness':ti,ab OR 'hypervigilance':ti,ab OR 'anxiousness':ti,ab OR 'social anxiety':ti,ab OR 'social anxieties':ti,ab                                                                                                                                                                                                                                            | 503,287   |
| #4 | 'depression'/exp OR 'central depression':ti,ab OR 'clinical depression':ti,ab OR 'depressive disease':ti,ab OR 'depressive disorder':ti,ab OR 'depressive episode':ti,ab OR 'depressive illness':ti,ab OR 'depressive personality disorder':ti,ab OR 'depressive state':ti,ab OR 'depressive symptom':ti,ab OR 'depressive syndrome':ti,ab OR 'mental depression':ti,ab OR 'parental depression':ti,ab                                  | 632,235   |
| #5 | 'psychology'/exp OR 'psychology':ti,ab OR 'cognitive science':ti,ab OR 'schizophrenic psychology':ti,ab                                                                                                                                                                                                                                                                                                                                 | 470,988   |
| #6 | 'mental health'/exp OR 'mental care':ti,ab OR 'mental condition':ti,ab OR 'mental factor':ti,ab OR 'mental help':ti,ab OR 'mental service':ti,ab OR 'mental state':ti,ab OR 'mental status':ti,ab OR 'mental status schedule':ti,ab OR 'psychic health':ti,ab                                                                                                                                                                           | 268,694   |
| #7 | 'psychosis'/exp                                                                                                                                                                                                                                                                                                                                                                                                                         | 346,169   |
| #8 | #3 OR #4 OR #5 OR #6 OR #7                                                                                                                                                                                                                                                                                                                                                                                                              | 1,743,151 |
| #9 | #1 AND #2 AND #8                                                                                                                                                                                                                                                                                                                                                                                                                        | 3,264     |

---

**Cochrane**

---

|    |                                                                          |        |
|----|--------------------------------------------------------------------------|--------|
| #1 | "back pain":ti,ab,kw OR "low back pain":ti,ab,kw OR "back pain":ti,ab,kw | 29,864 |
|----|--------------------------------------------------------------------------|--------|

---

|    |                                                                                                                                                                                                                                                                                                                                                                                                                                                                                                      |           |
|----|------------------------------------------------------------------------------------------------------------------------------------------------------------------------------------------------------------------------------------------------------------------------------------------------------------------------------------------------------------------------------------------------------------------------------------------------------------------------------------------------------|-----------|
|    | OR "lumbago":ti,ab,kw OR "backache":ti,ab,kw OR "back ache":ti,ab,kw                                                                                                                                                                                                                                                                                                                                                                                                                                 |           |
|    | OR "spinal stenosis":ti,ab,kw OR "canal stenosis":ti,ab,kw OR "lumbar stenosis":ti,ab,kw OR "lateral stenosis ":ti,ab,kw OR "neurogenic claudication":ti,ab,kw OR "radiculopathy":ti,ab,kw OR "radicular pain":ti,ab,kw OR "spondylolisthesis":ti,ab,kw OR "spondylosis":ti,ab,kw OR "sciatica":ti,ab,kw OR "intervertebral disc displacement":ti,ab,kw OR "spinal nerve roots":ti,ab,kw OR "neurologic signs ":ti,ab,kw OR "paresthesia":ti,ab,kw OR "paraesthesia":ti,ab,kw OR "numbness":ti,ab,kw |           |
| #2 | "randomized":ti,ab,kw OR "randomised":ti,ab,kw OR "randomization":ti,ab,kw OR "randomisation":ti,ab,kw OR "randomly":ti,ab,kw OR "placebo":ti,ab,kw OR "trial":ti,ab,kw OR "Random Allocation":ti,ab,kw OR "Randomized Controlled Trial":ti,ab,kw                                                                                                                                                                                                                                                    | 1,447,708 |
| #3 | "anxiety":ti,ab,kw OR "angst":ti,ab,kw OR "nervousness":ti,ab,kw OR "hypervigilance":ti,ab,kw OR "Anxiousness":ti,ab,kw OR "social anxiety":ti,ab,kw OR "social anxieties":ti,ab,kw                                                                                                                                                                                                                                                                                                                  | 97,215    |
| #4 | "depression":ti,ab,kw OR "depressive symptom":ti,ab,kw OR "emotional depression":ti,ab,kw                                                                                                                                                                                                                                                                                                                                                                                                            | 105,781   |
| #5 | "psychology":ti,ab,kw OR "psychological side effect":ti,ab,kw OR "psychosocial factor":ti,ab,kw OR "psychologist":ti,ab,kw                                                                                                                                                                                                                                                                                                                                                                           | 125,845   |
| #6 | "mental health":ti,ab,kw OR "mental hygiene":ti,ab,kw                                                                                                                                                                                                                                                                                                                                                                                                                                                | 27,858    |
| #7 | "psychotic disorder":ti,ab,kw OR "psychosis":ti,ab,kw OR "psychoses":ti,ab,kw OR "schizoaffective disorder":ti,ab,kw OR "schizophreniform disorder":ti,ab,kw OR "brief reactive psychoses":ti,ab,kw OR "brief reactive psychosis":ti,ab,kw                                                                                                                                                                                                                                                           |           |
| #8 | #3 OR #4 OR #5 OR #6 OR #7                                                                                                                                                                                                                                                                                                                                                                                                                                                                           | 259,509   |
| #9 | #1 AND #2 AND #8                                                                                                                                                                                                                                                                                                                                                                                                                                                                                     | 4,354     |

---



**Appendix 2. Main characteristics of included randomized controlled trials**

| Study                 | Country/<br>Region | Intervention Group                                                                |                  |                  |                  | Comparison Group                        |                  |                 |                  | Follow-up                                                                     | Outcome Measures                                             |
|-----------------------|--------------------|-----------------------------------------------------------------------------------|------------------|------------------|------------------|-----------------------------------------|------------------|-----------------|------------------|-------------------------------------------------------------------------------|--------------------------------------------------------------|
|                       |                    | Group (No. of Patients)                                                           | Age<br>(M ± SD)  | BMI<br>(M ± SD)  | Female,<br>n (%) | Group (No. of Patients)                 | Age<br>(M ± SD)  | BMI<br>(M ± SD) | Female,<br>n (%) |                                                                               |                                                              |
| Sıgılan 2023          | Turkey             | Myofascial group (21)                                                             | 38.0 (7.78)      | 26.42<br>(4.57)  | 9 (42.86)        | Control group (21)                      | 38.76<br>(8.96)  | 26.31<br>(5.65) | 13 (61.90)       | 4 weeks                                                                       | Depression (BDI)                                             |
| Sanabria-Mazo<br>2023 | Spain              | Acceptance and commitment therapy group (78)                                      | 54.9 (8.3)       | NR               | 54 (69.2)        | Treatment-as-usual group (78)           | 53.8 (10.0)      | NR              | 51 (65.4)        | 12 weeks                                                                      | Depression (DASS) and Anxiety (DASS)                         |
|                       |                    | Behavioral activation therapy group (78)                                          | 54.9 (10.2)      | NR               | 53 (67.9)        |                                         |                  |                 |                  |                                                                               |                                                              |
| Ogunniran 2023        | Nigeria            | Kinesiology taping and core-stabilization exercises group (13)                    | 42.15<br>(12.05) | 26.15<br>(3.09)  | NR               | Core-stabilization exercises group (17) | 45.29<br>(10.79) | 26.48<br>(4.16) | NR               | 8 weeks                                                                       | Depression (HADS) and Anxiety (HADS)                         |
|                       |                    | Kinesiology taping group (13)                                                     | 43.69<br>(9.53)  | 27.97<br>(2.99)  | NR               |                                         |                  |                 |                  |                                                                               |                                                              |
| Lazaridou 2023        | U.S.A.             | Biofeedback EMG alternative therapy (37)                                          | 46.0 (13.9)      | NR               | NR               | Usual care group (29)                   | 43.5 (13.9)      | NR              | NR               | 12 weeks                                                                      | Depression (HADS) and Anxiety (HADS)                         |
| Kim 2023              | South Korea        | Heat massage group (20)                                                           | 56.30<br>(12.28) | 25.83<br>(2.62)  | 11 (55.0)        | Physical therapy group (20)             | 56.15<br>(9.75)  | 25.93<br>(4.10) | 10 (50.0)        | 4 weeks                                                                       | Depression (BDI)                                             |
| Kanaan 2023           | Jordan             | Comprehensive education (27)                                                      | 46.44<br>(10.88) | 28.28<br>(10.88) | 22 (81)          | Standard physical therapy (27)          | 47.07<br>(11.53) | NR              | 21 (78)          | 3 months                                                                      | Depression (DASS) and Anxiety (DASS)                         |
| Groenveld 2023        | The Netherlands    | Self-administered behavioural therapy-based virtual reality (VR) application (20) | 51 (2.9)         | NR               | 17 (85)          | Standard care (20)                      | 52 (2.5)         | NR              | 16 (80)          | 4 months                                                                      | Depression (HADS), Anxiety (HADS), and Mental Health (SF-12) |
| Zheng 2022            | China              | M-health-based exercise (20)                                                      | 34.0 (14.4)      | 21.5 (2.7)       | 14 (70)          | Exercise only (20)                      | 34.9 (14.5)      | 22.3 (3.6)      | 12 (60)          | 18 weeks                                                                      | Depression (SDS), Anxiety (GAD-7), and Mental Health (SF-36) |
| Singphow 2022         | India              | Yoga group (39)                                                                   | 43.74<br>(7.26)  | 27.77<br>(3.67)  | 15 (38.5)        | Physical exercise group (38)            | 41.47<br>(9.53)  | 27.34<br>(2.91) | 13 (34.2)        | 16 weeks                                                                      | Depression (DASS) and Anxiety (DASS)                         |
| Shaygan 2022          | Iran               | Multimedia method (30)                                                            | 51.0 (9.7)       | NR               | 20 (66.7)        | Routine training (30)                   | 53.2 (12.6)      | NR              | 25 (83.3)        | Control group: 9.73 (6.2) weeks;<br>and Intervention group: 7.83 (5.26) weeks | Depression (BDI)                                             |
| Rim 2022              | Tunisia            | Therapeutic patient education (50)                                                | 45.6 (6.7)       | NR               | 10 (20)          | Usual care (50)                         | 42.9 (8.7)       | NR              | 14 (24)          | One year                                                                      | Depression (HADS) and Anxiety (HADS)                         |
| Lara-Palomo<br>2022   | Spain              | Internet-based E-Health program group (39)                                        | 41.9 (9.4)       | NR               | 22 (56.4)        | Home rehabilitation program group (35)  | 54.6 (12.9)      | NR              | 21 (60.0)        | 6 months                                                                      | Mental Health (SF-36)                                        |

|                            |              |                                                                                           |               |                     |            |                                                                |               |                     |            |                                     |                                                              |
|----------------------------|--------------|-------------------------------------------------------------------------------------------|---------------|---------------------|------------|----------------------------------------------------------------|---------------|---------------------|------------|-------------------------------------|--------------------------------------------------------------|
| Kızıldaş 2022              | Turkey       | Extracorporeal shock wave therapy (36)                                                    | 47.4 (14.3)   | 28.6 (4.9)          | 13 (36.1)  | Conventional physical therapy (34)                             | 45.3 (12.2)   | 35.2 (36.2)         | 20 (58.8)  | 12 weeks                            | Depression (BDI)                                             |
| Hrkać 2022                 | Croatia      | Cognitive-behavioral therapy, group-based combined exercise therapy and education (59)    | 49.2 (11.6)   | 26.4 (4.1)          | 34 (57.6)  | Usual care (58)                                                | 50.2 (11.2)   | 27.0 (3.7)          | 40 (69.0)  | 6 months                            | Depression (HADS), Anxiety (HADS), and Mental Health (SF-12) |
|                            |              | Supervised group-based combined exercise therapy and education (63)                       | 48.6 (12.3)   | 26.3 (3.7)          | 40 (63.5)  |                                                                |               |                     |            |                                     |                                                              |
| Diez 2022                  | Spain        | Mindfulness based intervention (36)                                                       | NR            | NR                  | NR         | Usual care (34)                                                | NR            | NR                  | NR         | 8 weeks                             | Depression (DASS), Anxiety (DASS), and Mental Health (SF-36) |
| Aguilar-Ferrández 2022     | Spain        | Exercises-kinesio taping group (29)                                                       | 44 (9)        | NR                  | 17 (58.62) | Exercises-analgesic current group (29)                         | 46 (5)        | NR                  | 21 (72.41) | One month                           | Depression (BDI) and Anxiety (BDI)                           |
| Yakşi 2021                 | Turkey       | Burst transcutaneous electrical nerve stimulation group (25)                              | 45.6 (9.4)    | 28.6 (4.8)          | 16 (64.0)  | Placebo transcutaneous electrical nerve stimulation group (23) | 40.8 (11.5)   | 29.9 (4.6)          | 18 (78.0)  | 3 months                            | Depression (BDI)                                             |
|                            |              | Conventional transcutaneous electrical nerve stimulation group (25)                       | 43.2 (12.8)   | 27.4 (4.1)          | 13 (52.0)  |                                                                |               |                     |            |                                     |                                                              |
| Schmidt 2021               | Denmark      | Integrated multidisciplinary rehabilitation programme group (65)                          | 51 (12)       | NR                  | 50 (77)    | Existing programme group (67)                                  | 54 (12)       | NR                  | 49 (73)    | One year                            | Depression (MDI)                                             |
| Polaski 2021               | U.S.A.       | Integrated meditation and exercise therapy group (18)                                     | 36.3 (14.1)   | 24.5 (2.9)          | 13 (72.2)  | Audiobook control group (20)                                   | 38.7 (16.8)   | 26.3 (2.7)          | 13 (65.0)  | 48 hours                            | Anxiety (STAI )                                              |
| Karaarslan 2021            | Turkey       | Peloid therapy and home exercise program (53)                                             | 49.66 (9.26)  | 28.70 (26.25–33.05) | 39 (73.6)  | Only home exercise program (53)                                | 44.74 (11.92) | 27.30 (23.95–30.20) | 39 (73.6)  | One month                           | Depression (BDI) and Mental Health (SF-36)                   |
| Darnall 2021               | U.S.A.       | Empowered relief group (87)                                                               | 49.7 (15.0)   | 27.3 (6.0)          | 44 (50.6)  | Health education group (88)                                    | 48.0 (13.2)   | 26.7 (6.3)          | 47 (53.4)  | 3 months                            | Depression (PROMIS) and Anxiety (PROMIS)                     |
|                            |              | Cognitive behavioral therapy group (88)                                                   | 45.9 (13.1)   | 27.0 (6.5)          | 40 (45.5)  |                                                                |               |                     |            |                                     |                                                              |
| Batbay 2021                | Turkey       | Pilates group (28)                                                                        | 49.3 (10.4)   | 25.0 (2.6)          | NR         | home exercise group (25)                                       | 48.4 (9.3)    | 26.3 (2.7)          | NR         | 8 weeks                             | Depression (BDI)                                             |
| Alzahrani 2021             | Saudi Arabia | Wearables-based walking intervention and usual physiotherapy care (12)                    | 49.0 (13.4)   | 29.30 (7.59)        | 3 (11.5)   | Usual physiotherapy care (14)                                  | 39.0 (13.8)   | 29.44 (6.25)        | 8 (30.8)   | 26 weeks                            | Depression (BDI)                                             |
| Ünal 2020                  | Turkey       | Myofascial induction therapy (20)                                                         | 41.25 (9.12)  | 24.65 (2.24)        | 10 (50)    | Pain neuroscience education (20)                               | 42.6 (7.96)   | 25.85 (3.36)        | 10 (50)    | 8 weeks                             | Mental Health (SF-36)                                        |
| Soleymani 2020             | Iran         | Rumination-focused cognitive-behavioral therapy (15)                                      | NR            | NR                  | 11 (36.6)  | Usual care (15)                                                | NR            | NR                  | 10 (33.3)  | 3 months                            | Depression (DASS) and Anxiety (DASS)                         |
| Schlicker 2020             | Germany      | Cognitive behavioral therapy and Web- and mobile-based guided self-help intervention (40) | 51.3 (8.60)   | NR                  | 26 (65)    | Waitlist control group (36)                                    | 50.1 (7.00)   | NR                  | 29 (81)    | 6 months                            | Anxiety (HADS)                                               |
| de Oliveira Meirelles 2020 | Brazil       | Osteopathic manipulation treatment group (20)                                             | 46.0 (10.4)   | 27.1 (4.2)          | 16 (57)    | Active control group (18)                                      | 50.1 (9.3)    | 26.5 (4.0)          | 12 (43)    | Measurement at the end of treatment | Depression (BDI)                                             |
| Suh 2019                   | South Korea  | Flexibility exercise group (13)                                                           | 53.54 (15.69) | NR                  | 8 (61.5)   | Walking exercise group (13)                                    | 54.15 (13.89) | NR                  | 11 (84.6)  | 6 weeks                             | Depression (BDI)                                             |
|                            |              | Stabilization exercise group (10)                                                         | 57.40 (15.88) | NR                  | 6 (60.0)   |                                                                |               |                     |            |                                     |                                                              |

|                    |                 |                                                                         |               |              |            |                                             |               |              |            |                                     |                                                              |  |
|--------------------|-----------------|-------------------------------------------------------------------------|---------------|--------------|------------|---------------------------------------------|---------------|--------------|------------|-------------------------------------|--------------------------------------------------------------|--|
|                    |                 | Stabilization with walking exercise group (12)                          | 54.75 (14.98) | NR           | 8 (66.7)   |                                             |               |              |            |                                     |                                                              |  |
| Petrozzi 2019      | Australia       | MoodGYM plus physical treatments (54)                                   | 50.1 (12.8)   | 27.0 (5.0)   | 29 (53.7)  | physical treatments alone (54)              | 50.6 (14.4)   | 26.7 (4.0)   | 25 (59.3)  | 12 months                           | Depression (DASS) and Anxiety (DASS)                         |  |
| Mariano 2019       | U.S.A.          | Transcranial direct current stimulation (10)                            | 65.7 (8.8)    | NR           | 1 (10.0)   | Sham group (11)                             | 60.7 (11.8)   | NR           | 2 (18.2)   | 6 weeks                             | Depression (PHQ-9) and Anxiety (GAD-7)                       |  |
| Hüppe 2019         | Germany         | Comprehensive health program (189)                                      | 53.4 (8.1)    | 27.6 (4.8)   | 60 (31.7)  | Control group (255)                         | 53.6 (8.7)    | 27.2 (4.9)   | 103 (40.4) | 24 months                           | Depression (PHQ-4) and Mental Health (SF-12)                 |  |
| Huber 2019         | Austria         | Green exercise group (27)                                               | 52.85 (6.43)  | 24.78 (2.73) | 14 (51.9)  | Control group without any intervention (27) | 43.81 (12.07) | 25.06 (3.18) | 17 (63.0)  | 120 days                            | Mental Health (SF-36)                                        |  |
|                    |                 | Green exercise and balneotherapy group (26)                             | 53.35 (8.26)  | 26.32 (4.47) | 14 (53.8)  |                                             |               |              |            |                                     |                                                              |  |
| Gardner 2019       | Australia       | Education combined with patientled goal setting group (37)              | 44 (12.5)     | NR           | 18 (48.6)  | Standardised exercise programme group (38)  | 45 (13.8)     | NR           | 25 (65.8)  | 12 months                           | Depression (DASS) and Anxiety (DASS)                         |  |
| Kuvacic 2018       | Croatia         | Yoga group (15)                                                         | 33.6 (4.30)   | NR           | 6 (40.0)   | Pamphlet group (15)                         | 34.7 (4.83)   | NR           | 8 (53.3)   | one week                            | Depression (SDS) and Anxiety (SAS)                           |  |
| Hohmann 2018       | Germany         | Leech therapy (25)                                                      | 59.29 (6.99)  | 27.69 (5)    | NR         | Exercise therapy (19)                       | 56.53 (7.8)   | 25.53 (5.2)  | NR         | 56±5 days                           | Depression (CES) and Mental Health (SF-36)                   |  |
| Glombiewski 2018   | Germany         | Exposure-long group (30)                                                | 52.7 (9.4)    | NR           | 12 (38.5)  | Cognitive-behavioral therapy group (32)     | 53.5 (9.0)    | NR           | 23 (71.9)  | 6 months                            | Depression (HADS)                                            |  |
|                    |                 | Exposure-short group (26)                                               | 51.8 (9.2)    | NR           | 13 (50.0)  |                                             |               |              |            |                                     |                                                              |  |
| Tüzün 2017         | Northern Cyprus | Dry needling therapy (18)                                               | 50.1 (11.8)   | 29.6 (6.1)   | 8 (44.4)   | Classical physiotherapy (16)                | 50.9 (12.5)   | 27.9 (4.4)   | 12 (75.0)  | Measurement at the end of treatment | Depression (BDI)                                             |  |
| Seo 2017           | South Korea     | Bee venom acupuncture group (27)                                        | 49.85 (14.44) | NR           | 18 (66.67) | Sham group (27)                             | 50.07 (11.06) | NR           | 23 (85.19) | 12 weeks                            | Depression (BDI)                                             |  |
| Nayback-Beebe 2017 | U.S.A.          | Pulsed electromagnetic frequency therapy and usual care group (36)      | 19-60         | NR           | NR         | Usual care group (32)                       | 19-60         | NR           | NR         | 8 weeks                             | Depression (PHQ-9) and Anxiety (GAD-7)                       |  |
| Kumar 2017         | Germany         | Ayurvedic massage group (32)                                            | 55.4 (11.2)   | 25.8 (4.2)   | 26 (81.25) | Control group (32)                          | 54.2 (13.8)   | 26.9 (4.4)   | 23 (71.88) | 4 weeks                             | Depression (POMS) and Mental Health (SF-36)                  |  |
| Harris 2017        | Norway          | Cognitive-behavioural treatment and a brief cognitive intervention (55) | 45.5 (9.1)    | NR           | NR         | Brief cognitive intervention (99)           | 44.8 (9.7)    | NR           | NR         | 12 months                           | Depression (HADS) and Anxiety (HADS)                         |  |
|                    |                 | Physical exercise and a brief cognitive intervention (60)               | 44.2 (10.6)   | NR           | NR         |                                             |               |              |            |                                     |                                                              |  |
| Michalsen 2016     | Germany         | Focused meditation group (32)                                           | 55.5 (10.6)   | NR           | 29 (90.6)  | Self-care exercise group (36)               | 54.8 (10.6)   | NR           | 23 (63.9)  | 8 Weeks                             | Depression (HADS), Anxiety (HADS), and Mental Health (SF-36) |  |
| Trapp 2015         | Germany         | Visual feedback group (15)                                              | 45.53 (7.05)  | NR           | 5 (33.3)   | Control group (15)                          | 40.60 (10.67) | NR           | 9 (60.0)   | Measurement at the end of treatment | Depression (BDI)                                             |  |
| Lawand 2015        | Brazil          | Muscle stretching program using global postural reeducation method (31) | 49.4 (12.0)   | 26.17 (2.95) | 25 (80.6)  | Control group (30)                          | 47.5 (11.9)   | 26.22 (3.18) | 22 (73.3)  | 6 months                            | Depression (BDI) and Mental Health (SF-36)                   |  |
| Kogure 2015        | Japan           | Arthrokinematic Approach-Hakata group (90)                              | 60.0 (12.7)   | 23.7 (5.4)   | 54 (60.0)  | Sham group (89)                             | 59.6 (13.3)   | 22.6 (4.7)   | 57 (64.0)  | 6 months                            | Mental Health (SF-36)                                        |  |
| Zhang 2014         | China           | Health education group (27)                                             | 22.29         | 21.02        | 9 (33.3)   | Exercise group (27)                         | 23.04         | 21.41        | 11 (40.7)  | Measurement at the                  | Mental Health (SF-36)                                        |  |

|                    |         |                                                                                         |             |             |        |           |                                                                   |             |             |         |           |                                        |                                                                      |
|--------------------|---------|-----------------------------------------------------------------------------------------|-------------|-------------|--------|-----------|-------------------------------------------------------------------|-------------|-------------|---------|-----------|----------------------------------------|----------------------------------------------------------------------|
| Monticone 2014     | Italy   | Multidisciplinary rehabilitation programme group (10)                                   | 58.9 (16.4) | (2.85)      | (2.85) | 7 (70)    | Usual-care alone group (10)                                       | 56.6 (14.4) | (2.24)      | (0)1.95 | 4 (40)    | end of treatment<br>3 months           | Mental Health (SF-36)                                                |
| Tekur 2012         | India   | Yoga group (40)                                                                         | 49 (3.6)    |             | NR     | 21 (52.5) | Control group (40)                                                | 48 (4.0)    |             | NR      | 15 (37.5) | Measurement at the<br>end of treatment | Depression (BDI) and Anxiety (STAI)                                  |
| Kader 2012         | U.K.    | Back education and gym ball exercise (20)                                               | 18-65       |             | NR     | NR        | Back education and standard physiotherapy (17)                    | 18-65       |             | NR      | NR        | 10 Weeks                               | Depression (Modified Zung epression index) and Mental Health (SF-36) |
| Cuesta-Vargas 2012 | Spain   | Perifacet injection (19)<br>Deep water running and standard general practice group (29) | 38.6 (12.2) | 18-65       | NR     | NR        | Standard general practice alone group (29)                        | 37.8 (13.2) | 25.2 (4.1)  |         | 16 (56)   | 12 months                              | Mental Health (SF-12)                                                |
| Tavafian 2011      | Iran    | Multidisciplinary rehabilitation program (97)                                           | 44.6 (10.2) |             | NR     | 71 (73.2) | Control group (100)                                               | 45.9 (11.3) |             | NR      | 83 (83.0) | 6 months                               | Mental Health (SF-36)                                                |
| Engbert 2011       | Germany | Therapeutic climbing group (10)                                                         | 51.9        |             | NR     | 6 (60.0)  | Standard exercise group (13)                                      | 50.4        |             | NR      | 6 (46.2)  | Measurement at the<br>end of treatment | Mental Health (SF-36)                                                |
| Glombiewski 2010   | Germany | Cognitive-behavioural therapy including biofeedback tools group (62)                    | 48.9 (10.5) |             | NR     | 41 (66.1) | Cognitive-behavioural therapy group (54)                          | 48.6 (13.1) |             | NR      | 36 (66.7) | 6 months                               | Depression (BDI)                                                     |
| Durmus 2010        | Turkey  | Electrical stimulation and exercises group (20)                                         | 49.00       |             | NR     |           | Only exercises group (20)                                         | 47.05       | 28.50       |         | NR        | 6 weeks                                | Depression (BDI) and Mental Health (SF-36)                           |
|                    |         | Ultrasound therapy and exercises group (19)                                             | (7.87)      | (5.37)      |        | NR        |                                                                   | (12.46)     | (1.84)      |         |           |                                        |                                                                      |
| Williams 2009      | Canada  | Iyengar yoga group (43)                                                                 | 48.4 (1.86) | 25.8 (0.57) |        | 32 (74.4) | Control group receiving standard medical care (47)                | 47.6 (1.47) | 27.4 (0.60) |         | 37 (78.7) | 6 months                               | Depression (BDI)                                                     |
| Sertpoyraz 2009    | Turkey  | Isokinetic exercise group (20)                                                          | 38.75       |             | NR     | 16 (80)   | Standard exercise group (20)                                      | 38.25(7.36) |             | NR      | 15 (75)   | 7 weeks                                | Depression (BDI)                                                     |
| Ribeiro 2008       | Brazil  | Back school program group (26)                                                          | 48.1 (14,1) | 27.1 (4.8)  |        | 19 (73.1) | control group for weekly medical visits (29)                      | 52.8 (10)   | 27.1 (3.2)  |         | 26 (89.7) | 120 days                               | Depression (BDI) and Anxiety (STAI)                                  |
| Koldaş Doğan 2008  | Turkey  | Aerobic exercise and home exercise group (19)                                           | 37.1 (6.5)  |             | NR     | 15 (78.9) | Home exercise only group (18)                                     | 42.1 (9.5)  |             | NR      | 14 (77.8) | 1 month                                | Depression (BDI)                                                     |
|                    |         | Physical therapy (hot pack, ultrasound, TENS) and home exercise group (18)              | 41.5 (8.3)  |             | NR     | 14 (77.8) |                                                                   |             |             |         |           |                                        |                                                                      |
| Tavafian 2007      | Iran    | Back school group (50)                                                                  | 42.9 (10.7) |             | NR     | NR        | Clinic group (52)                                                 | 44.7 (10.8) |             | NR      | NR        | 3 months                               | Mental Health (SF-36)                                                |
| Kaapa 2006         | Finland | Multidisciplinary rehabilitation group (59)                                             | 46 (7.9)    | 25 (4.8)    |        | 59 (100)  | Individual physiotherapy group (61)                               | 46.5 (7.0)  | 26.5 (4.7)  |         | 61 (100)  | 24 months                              | Depression (DEPS)                                                    |
| Galantino 2004     | U.S.A.  | Modified hatha yoga group (11)                                                          | 30-65       |             | NR     | NR        | Wait-list group (11)                                              | 30-65       |             | NR      | NR        | 3 months                               | Depression (BDI)                                                     |
| Weiner 2003        | U.S.A.  | Electrical nerve stimulation and physical therapy group (17)                            | 74.1 (4.6)  |             | NR     | 11 (64.7) | Sham electrical nerve stimulation and physical therapy group (17) | 73.5 (5.7)  |             | NR      | 7 (41.2)  | 3 months                               | Depression (Geriatric Depression Scale)                              |
| Niemisto 2003      | Finland | Combined Manipulation, stabilizing exercises, and physician consultation                | 37.3 (5.6)  |             | NR     | 56 (55)   | Physician consultation alone (102)                                | 36.7 (5.6)  |             | NR      | 54 (53)   | 12 months                              | Depression (DEPS)                                                    |

|                        |        |                                                         |                  |    |          |                                   |                 |    |          |           |                                         |
|------------------------|--------|---------------------------------------------------------|------------------|----|----------|-----------------------------------|-----------------|----|----------|-----------|-----------------------------------------|
| Hernandez-Reif<br>2001 | U.S.A. | (102)<br>Massage group (12)                             | 43.8 (13.7)      | NR | 7 (58.3) | Relaxation training group<br>(12) | 36.7 (16.1)     | NR | 6 (50.0) | 5 weeks   | Depression (POMS) and Anxiety<br>(STAI) |
| Newton-John<br>1995    | U.K.   | Cognitive-behavioural therapy group<br>(16)             | 44.37<br>(12.64) | NR | NR       | Wait-list group (12)              | 47.72<br>(9.76) | NR | NR       | 6 months  | Depression (BDI) and Anxiety<br>(STAI)  |
| Turner 1993            | U.S.A. | Electromyographic biofeedback group<br>(16)             | 44.93<br>(11.91) | NR | NR       |                                   |                 |    |          |           |                                         |
|                        |        | Cognitive therapy group (23)                            | 22-62            | NR | NR       | Wait-list group (30)              | 22-62           | NR | NR       | 12 months | Depression (BDI)                        |
|                        |        | Relaxation training group (24)                          | 22-62            | NR | NR       |                                   |                 |    |          |           |                                         |
|                        |        | Cognitive therapy and Relaxation<br>training group (25) | 22-62            | NR | NR       |                                   |                 |    |          |           |                                         |

**Notes:** Continuous were reported as mean±standard deviation (M ± SD), and dichotomous are reported as n (%), n is the number of participants with chronic low back pain. BMI, Body mass index; No., Number; NR: not reported; BDI, the Beck Depression Inventory; DASS, the Depression Anxiety and Stress Scale; HADS, the Hospital Anxiety and Depression Scale; SF-12/36, 12/36-item short form health survey; GAD-7, Generalized Anxiety Disorder-7; MDI, Major Depression Inventory; STAI, the State/Trait Anxiety Inventory; PROMIS, Patient-Reported Outcomes Measurement Information System short-form measures; PHQ-4/9, the Patient Health Questionnaire-4/9; GAD-7, Generalized Anxiety Disorder-7; SDS, the Self-Rating Depression Scale; SAS, Zung self-rating anxiety scale; CES, Center for Epidemiologic Studies; POMS, the Profile of Mood states; DEPS, Finnish Depression Questionnaire.

### Appendix 3. Coding guide and description of different interventions

| Categories of non-pharmacological intervention | Specific treatments     | Code | Definitions of coding an experimental intervention under the corresponding component                                                                                                 |
|------------------------------------------------|-------------------------|------|--------------------------------------------------------------------------------------------------------------------------------------------------------------------------------------|
| <b>Control</b>                                 |                         | CO   | Active control or usual care                                                                                                                                                         |
|                                                | Active control          | AC   | A regular exercise program of low intensity or regular programmed health education                                                                                                   |
|                                                | Usual care              | UC   | Standard/routine care, no treatment, placebo, wait-list control, or sham treatment                                                                                                   |
| <b>Exercise</b>                                |                         | EX   | Any physical activity that involves the use of skeletal muscles and requires energy expenditure                                                                                      |
|                                                | Aerobic training        | AT   | Exercising with adequate oxygen provision (such as walking, cycling, climbing etc)                                                                                                   |
|                                                | Relaxation training     | RT   | Systematic progressive muscle relaxation training, which involved practice sessions                                                                                                  |
|                                                | Stretching training     | ST   | Exercise emphasizes muscle lengthening through static or isometric movements                                                                                                         |
|                                                | Flexibility training    | FT   | Exercise focuses on the enhancing the range of motion of joint systems through active movements, without including a stretching component                                            |
|                                                | Stabilization exercise  | SE   | Exercise that focuses on modifiable intensity level based on the exercise capacities of each participant, including supine, dead bug, side lying, prone, bird dog, bridge, and plank |
|                                                | Mixed exercise training | ME   | A combination of two or more specific treatments of exercise types                                                                                                                   |
| <b>Mind body therapy</b>                       |                         | MBT  | Interventions that aim at addressing both physical and mental aspects, such as Yoga, Pilates, and Qigong                                                                             |
| <b>Education</b>                               |                         | EDU  | Interventions that prioritize enhancing awareness and promoting positive attitudes and knowledge pertaining to health enhancement                                                    |
| <b>Telemedicine</b>                            |                         | TM   | Internet- or mobile-based interventions, including the application of virtual reality, web-based system, and mobile apps                                                             |
| <b>Biopsychosocial Approach</b>                |                         | BA   | Interventions that aim to modify behavior, emotional state, or feelings, without providing any particular knowledge or information about a specific field                            |

|                         |                                 |      |                                                                                                                                                                                                                                                                                          |
|-------------------------|---------------------------------|------|------------------------------------------------------------------------------------------------------------------------------------------------------------------------------------------------------------------------------------------------------------------------------------------|
| <b>Physical therapy</b> | Cognitive-behavioral treatments | CBT  | Enhancing physical performance by enhancing the mental processing and manipulation of information                                                                                                                                                                                        |
|                         | Psychosocial intervention       | PI   | Interventions that integrate psychological and social elements in its framework, such as counselling, problem adaptation therapy, goal setting, feedback, motivational interview, etc)                                                                                                   |
|                         | Meditation                      | Medi | Sustained recognition of the knowing quality of awareness itself, which focuses on orientation to the present moment with openness and acceptance                                                                                                                                        |
|                         |                                 | PT   | Interventions that aim to improve or recover one's health by utilizing physical factors such as heat, vibration, light, electricity, and orthotic appliances.                                                                                                                            |
|                         | Massage                         | Mass | A healthcare method that stimulates acupuncture points and regulates bodily functions by applying pressure, kneading, rubbing, and other techniques using the hands, fingers, palms, and elbows, to enhance the physiological state of the body                                          |
|                         | Thermal therapy                 | TT   | The therapy that utilizes temperature to improve physical health, by relieving muscle stiffness and pain, reducing inflammation, improving blood circulation and metabolism                                                                                                              |
|                         | Manipulative treatment          | MT   | A typical physical therapy intervention that aims to ameliorate or eradicate complications related to muscles, bones, or joints, such as pain, stiffness, inflammation, and related anomalies                                                                                            |
|                         | Acupuncture                     | Acup | A traditional Chinese medicine technique that involves the insertion of thin needles into specific points on the body to balance the flow of energy, or Qi, within the body, and stimulate the body's natural healing processes                                                          |
|                         | Electrical stimulation          | ES   | The transcutaneous electrical nerve stimulation that utilizes low frequency electrical impulse currents through the skin to stimulate the peripheral nerves and produce various physiological effects                                                                                    |
|                         | Ultrasound therapy              | US   | The intervention that promotes tissue recovery and pain relief through the acoustic force and thermal effect of ultrasound waves by promoting blood and lymph circulation, allowing the tissues to receive sufficient oxygen and nutrients, thus accelerating tissue repair and recovery |
|                         | Kinesiology taping              | KT   | A physical therapy procedure that utilizes a unique adhesive tape to facilitate the therapy, rehabilitation, and prevention of muscular, joint, and soft tissue disorders                                                                                                                |
|                         | Leech therapy                   | LT   | A conventional medical procedure that utilizes                                                                                                                                                                                                                                           |

|                                    |                                          |      |                                                                                                                                                                                                          |
|------------------------------------|------------------------------------------|------|----------------------------------------------------------------------------------------------------------------------------------------------------------------------------------------------------------|
|                                    |                                          |      | medicinal leeches to extract blood from patients' bodies                                                                                                                                                 |
|                                    | Myofascial induction therapy             | MIT  | A form of manual therapy that aims to promote healing and reduce pain by enhancing blood flow, reducing inflammation, and breaking down adhesions in the fascial tissue                                  |
|                                    | Pulsed electromagnetic frequency therapy | PEF  | A complementary therapy that delivers short bursts of electrical microamperes, which are millionths of an ampere, to injured tissues without producing heat or interfering with nerve or muscle function |
|                                    | Perifacet injection therapy              | PIT  | The intervention that relieves the pain from the source of lumbar facet joints and multifidus muscle                                                                                                     |
|                                    | Extracorporeal shock wave therapy        | ESWT | A non-invasive medical treatment that utilizes shock waves to treat an array of musculoskeletal conditions                                                                                               |
|                                    | Mixed physical therapies                 | MPT  | A combination of two or more specific treatments of physical therapy                                                                                                                                     |
| <b>Multicomponent intervention</b> | Multicomponent intervention              | MUI  | Interventions that involve a combination of two or more categories mentioned above                                                                                                                       |



Appendix 4. Summary of risk of bias assessment using Risk of bias 2 on included randomized controlled trials

| Author                 | 1. Randomization process |     |     |               | 2. Deviations from intended interventions |     |     |     |     |     |     |               | 3. Missing outcome data |     |     |     |               | 4. Measurement of the outcome |     |     |     |     |      | 5. Selection of the reported result |     |     |               | Overall Bias  |
|------------------------|--------------------------|-----|-----|---------------|-------------------------------------------|-----|-----|-----|-----|-----|-----|---------------|-------------------------|-----|-----|-----|---------------|-------------------------------|-----|-----|-----|-----|------|-------------------------------------|-----|-----|---------------|---------------|
|                        | 1.1                      | 1.2 | 1.3 | RoB           | 2.1                                       | 2.2 | 2.3 | 2.4 | 2.5 | 2.6 | 2.7 | RoB           | 3.1                     | 3.2 | 3.3 | 3.4 | RoB           | 4.1                           | 4.2 | 4.3 | 4.4 | 4.5 | RoB  | 5.1                                 | 5.2 | 5.3 | RoB           | RoB           |
| Sıgılan 2023           | Y                        | PY  | N   | Low           | N                                         | N   | NA  | NA  | NA  | PY  | NA  | Low           | PY                      | NA  | NA  | NA  | Low           | N                             | PN  | N   | NA  | NA  | Low  | Y                                   | PN  | PN  | Low           | Low           |
| Sanabria-Mazo 2023     | Y                        | Y   | N   | Low           | PY                                        | PY  | PN  | NA  | NA  | PY  | NA  | Low           | PN                      | NA  | NA  | NA  | Low           | PN                            | PN  | PY  | PN  | NA  | Low  | PY                                  | NI  | NI  | Some concerns | Some concerns |
| Ogunniran 2023         | Y                        | Y   | PN  | Low           | PY                                        | Y   | PN  | NA  | NA  | PN  | PN  | Some concerns | PN                      | PY  | NA  | NA  | Low           | PN                            | PN  | PY  | PN  | NA  | Low  | PY                                  | PN  | PN  | Low           | Some concerns |
| Lazaridou 2023         | Y                        | NI  | NI  | Some concerns | NI                                        | PY  | PN  | NA  | NA  | PY  | NA  | Low           | PN                      | PN  | PY  | PN  | Some concerns | PN                            | PN  | PY  | PN  | NA  | Low  | PY                                  | NI  | NI  | Some concerns | Some concerns |
| Kim 2023               | Y                        | Y   | PN  | Low           | PN                                        | PY  | PY  | PY  | PY  | NI  | PN  | Some concerns | PY                      | NA  | NA  | NA  | Low           | PN                            | PN  | Y   | PN  | NA  | Low  | PY                                  | PN  | PN  | Low           | Some concerns |
| Kanaan 2023            | Y                        | PY  | PN  | Low           | PY                                        | PY  | PY  | PN  | NA  | PY  | NA  | Some concerns | PN                      | PY  | NA  | NA  | Low           | PN                            | PN  | PN  | NA  | NA  | Low  | PY                                  | PN  | PN  | Low           | Some concerns |
| Groenveld 2023         | Y                        | PY  | PN  | Low           | PY                                        | PN  | PY  | PN  | NA  | PY  | NA  | Some concerns | PN                      | PN  | PY  | PN  | Some concerns | PN                            | PN  | PY  | PN  | NA  | Low  | PY                                  | PN  | PN  | Low           | Some concerns |
| Zheng 2022             | Y                        | Y   | PN  | Low           | PY                                        | PN  | PY  | PN  | NA  | PY  | NA  | Some concerns | PY                      | NA  | NA  | NA  | Low           | PN                            | PN  | N   | NA  | NA  | Low  | PY                                  | PN  | PN  | Low           | Some concerns |
| Singphow 2022          | Y                        | Y   | PN  | Low           | PY                                        | PY  | PY  | PN  | NA  | PY  | NA  | Some concerns | PY                      | NA  | NA  | NA  | Low           | PN                            | PN  | N   | NA  | NA  | Low  | PY                                  | PN  | PN  | Low           | Some concerns |
| Shaygan 2022           | Y                        | N   | PN  | High          | Y                                         | Y   | PY  | PY  | PN  | PY  | NA  | High          | NI                      | PN  | PY  | PY  | High          | PN                            | PN  | PY  | PN  | NA  | Low  | PN                                  | NI  | NI  | Some concerns | High          |
| Rim 2022               | Y                        | PY  | PN  | Low           | PY                                        | PY  | PY  | PN  | NA  | PY  | NA  | Some concerns | PN                      | PN  | PY  | PN  | Some concerns | PN                            | PN  | PY  | NI  | NI  | High | PY                                  | NI  | NI  | Some concerns | High          |
| Lara-Palomo 2022       | Y                        | PY  | PN  | Low           | PY                                        | PN  | PN  | NA  | NA  | PY  | NA  | Low           | PN                      | PY  | NA  | NA  | Low           | PN                            | PN  | PN  | NA  | NA  | Low  | PY                                  | NI  | NI  | Some concerns | Some concerns |
| Kızıltaş 2022          | Y                        | PY  | PN  | Low           | PY                                        | PY  | PY  | PY  | PY  | PN  | PN  | Some concerns | PN                      | PN  | PY  | PY  | High          | PN                            | PN  | PY  | NI  | NI  | High | PY                                  | NI  | NI  | Some concerns | High          |
| Hrkać 2022             | Y                        | PY  | PN  | Low           | PY                                        | PY  | PN  | NA  | NA  | PY  | NA  | Low           | PN                      | PY  | NA  | NA  | Low           | PN                            | PN  | PN  | NA  | NA  | Low  | PY                                  | PN  | PN  | Low           | Low           |
| Diez 2022              | Y                        | PY  | PN  | Low           | PY                                        | PY  | NI  | NA  | NA  | PY  | NA  | Some concerns | PY                      | NA  | NA  | NA  | Low           | PN                            | PN  | PN  | NA  | NA  | Low  | PY                                  | PN  | PN  | Low           | Some concerns |
| Aguilar-Ferrándiz 2022 | Y                        | PY  | PN  | Low           | PY                                        | PN  | PN  | NA  | NA  | PY  | NA  | Low           | Y                       | NA  | NA  | NA  | Low           | PN                            | PN  | PN  | NA  | NA  | Low  | PY                                  | NI  | NI  | Some concerns | Some concerns |
| Yakşi 2021             | Y                        | Y   | PN  | Low           | N                                         | PY  | PN  | NA  | NA  | PY  | NA  | Low           | PY                      | NA  | NA  | NA  | Low           | PN                            | PN  | PY  | NI  | NI  | High | PY                                  | NI  | NI  | Some concerns | High          |
| Schmidt 2021           | Y                        | PN  | PN  | High          | PY                                        | PY  | PY  | PN  | NA  | PY  | NA  | Some concerns | PN                      | PN  | PY  | NI  | High          | PN                            | PN  | PY  | PN  | NA  | Low  | PY                                  | PN  | PN  | Low           | High          |

|                            |   |    |    |               |    |    |    |    |    |    |    |               |    |    |    |    |               |    |    |    |    |    |               |    |    |    |               |               |
|----------------------------|---|----|----|---------------|----|----|----|----|----|----|----|---------------|----|----|----|----|---------------|----|----|----|----|----|---------------|----|----|----|---------------|---------------|
| Polaski 2021               | Y | PY | PN | Low           | PY | PN | PN | NA | NA | PY | NA | Low           | PN | PY | NA | NA | Low           | PN | PN | PY | PY | PN | Some concerns | PY | NI | NI | Some concerns | Some concerns |
| Karaarslan 2021            | Y | PY | PN | Low           | PY | PY | PN | NA | NA | PY | NA | Low           | PN | PN | PY | PN | Some concerns | PN | PN | N  | NA | NA | Low           | PY | NI | NI | Some concerns | Some concerns |
| Darnall 2021               | Y | PY | PN | Low           | PY | PN | PN | NA | NA | PY | NA | Low           | PN | PY | NA | NA | Low           | PN | PN | PN | NA | NA | Low           | PY | PN | PN | Low           | Low           |
| Batibay 2021               | Y | PY | PN | Low           | PY | PY | PN | NA | NA | PY | NA | Low           | PY | NA | NA | NA | Low           | PN | PN | PY | NI | NI | High          | PY | NI | NI | Some concerns | High          |
| Alzahrani 2021             | Y | PY | PN | Low           | PY | PY | PN | NA | NA | PY | NA | Low           | PY | NA | NA | NA | Low           | PN | PN | PY | NI | PN | Some concerns | PY | NI | NI | Some concerns | Some concerns |
| Ünal 2020                  | Y | PY | PN | Low           | PY | PY | Y  | PN | NA | PN | PN | Some concerns | PY | NA | NA | NA | Low           | PN | PN | PN | NA | NA | Low           | PY | NI | NI | Some concerns | Some concerns |
| Soleymani 2020             | Y | PY | PN | Low           | PY | PY | PN | NA | NA | PY | NA | Low           | PN | PN | PY | PN | Some concerns | PN | PN | PY | PY | PN | Some concerns | PY | NI | NI | Some concerns | Some concerns |
| Schlicker 2020             | Y | Y  | PN | Low           | Y  | PY | PY | PY | PY | Y  | NA | Some concerns | Y  | NA | NA | NA | Low           | PN | PN | PY | PY | PY | High          | PY | PN | PN | Low           | High          |
| de Oliveira Meirelles 2020 | Y | Y  | PN | Low           | PY | N  | PN | NA | NA | PY | NA | Low           | PY | NA | NA | NA | Low           | PN | PN | N  | NA | NA | Low           | PY | NI | NI | Some concerns | Some concerns |
| Suh 2019                   | Y | PY | PY | Some concerns | Y  | PY | PY | PY | PY | Y  | NA | Some concerns | PN | PY | NA | NA | Low           | PN | PN | PY | PN | NA | Low           | PY | NI | NI | Some concerns | Some concerns |
| Petrozzi 2019              | Y | Y  | PY | Some concerns | PY | PN | PN | NA | NA | PY | NA | Low           | PN | PN | PY | PN | Some concerns | PN | PN | PN | NA | NA | Low           | PY | NI | NI | Some concerns | Some concerns |
| Mariano 2019               | Y | NI | PN | Some concerns | PY | PY | PN | NA | NA | PY | NA | Low           | PY | NA | NA | NA | Low           | PN | PN | PY | PN | NA | Low           | PY | NI | NI | Some concerns | Some concerns |
| Hüppe 2019                 | Y | PY | PN | Low           | PY | PY | PY | PY | PY | PN | PN | Some concerns | PN | PN | PY | PY | High          | PN | PN | PY | PN | NA | Low           | PN | NI | NI | Some concerns | High          |
| Huber 2019                 | Y | PY | PN | Low           | PY | PY | PY | PY | PY | PY | NA | Some concerns | PY | NA | NA | NA | Low           | PN | PN | PY | PY | PY | High          | PY | NI | NI | Some concerns | High          |
| Gardner 2019               | Y | PY | PN | Low           | PY | PN | PN | NA | NA | PY | NA | Low           | Y  | NA | NA | NA | Low           | PN | PN | PN | NA | NA | Low           | PY | PN | PN | Low           | Low           |
| Kuvacic 2018               | Y | PY | PY | Some concerns | PY | PY | PY | PN | NA | PY | NA | Some concerns | PY | NA | NA | NA | Low           | PN | PN | PY | PN | NA | Low           | PY | NI | NI | Some concerns | Some concerns |
| Hohmann 2018               | Y | PY | PY | Some concerns | Y  | Y  | PY | PN | NA | PN | PY | High          | PN | PN | PY | NI | High          | PN | PN | Y  | PY | PN | Some concerns | PY | PY | PY | High          | High          |
| Glombiewski 2018           | Y | PY | PY | Some concerns | Y  | PN | NI | NA | NA | PY | NA | Some concerns | PY | NA | NA | NA | Low           | PN | PN | PN | NA | NA | Low           | PY | NI | NI | Some concerns | Some concerns |
| Tüzün 2017                 | Y | PY | PY | Some concerns | PY | PN | PN | NA | NA | PY | NA | Low           | Y  | NA | NA | NA | Low           | PN | PN | PY | PN | NA | Low           | PY | NI | NI | Some concerns | Some concerns |
| Seo 2017                   | Y | PY | PN | Low           | PY | PN | PN | NA | NA | Y  | NA | Low           | PY | NA | NA | NA | Low           | PN | PN | PN | NA | NA | Low           | PY | PN | PN | Low           | Low           |
| Nayback-Beebe 2017         | Y | PY | PY | Some concerns | Y  | Y  | PY | PY | PY | PY | NA | Some concerns | NI | PY | NA | NA | Low           | PN | PN | Y  | PY | PY | High          | PY | NI | NI | Some concerns | High          |
| Kumar 2017                 | Y | PY | PN | Low           | PY | PY | PN | NA | NA | PY | NA | Low           | PN | PY | NA | NA | Low           | PN | PN | PY | PY | PN | Some concerns | PY | NI | NI | Some concerns | Some concerns |

|                    |    |    |    |               |    |    |    |    |    |    |    |               |    |    |    |    |               |    |    |     |    |    |               |    |    |    |               |               |
|--------------------|----|----|----|---------------|----|----|----|----|----|----|----|---------------|----|----|----|----|---------------|----|----|-----|----|----|---------------|----|----|----|---------------|---------------|
| Harris 2017        | Y  | PY | PN | Low           | PY | PN | PY | PN | NA | PY | NA | Some concerns | PN | PN | PY | PN | Some concerns | PN | PN | PY  | PY | PY | High          | PY | NI | NI | Some concerns | High          |
| Michalsen 2016     | Y  | Y  | PN | Low           | Y  | PY | PY | PY | PY | PY | NA | Some concerns | PN | PN | PY | PN | Some concerns | PN | PN | PY  | PY | PN | Some concerns | PY | PN | PN | Low           | Some concerns |
| Trapp 2015         | Y  | PY | PY | Some concerns | PY | PY | PY | PY | PN | PY | NA | High          | PY | NA | NA | NA | Low           | PN | PN | PY  | NI | NI | High          | PY | PN | PN | Low           | High          |
| Lawand 2015        | Y  | PY | PN | Low           | PY | PN | PN | NA | NA | PY | NA | Low           | PY | NA | NA | NA | Low           | PN | PN | PN  | NA | NA | Low           | PY | PN | PN | Low           | Low           |
| Kogure 2015        | Y  | PY | PN | Low           | N  | Y  | PN | NA | NA | PY | NA | Low           | PN | PY | NA | NA | Low           | PN | PN | PY  | PY | PN | Some concerns | PY | NI | NI | Some concerns | Some concerns |
| Zhang 2014         | Y  | Y  | PN | Low           | PY | PY | PY | PY | PY | PY | NA | Some concerns | PY | NA | NA | NA | Low           | PN | PN | PY  | PY | PY | High          | PY | PY | PY | High          | High          |
| Monticone 2014     | Y  | PY | PN | Low           | Y  | Y  | PY | PY | PY | PY | NA | Some concerns | PY | NA | NA | NA | Low           | PN | PN | Y   | PY | PN | Some concerns | Y  | NI | NI | Some concerns | Some concerns |
| Tekur 2012         | Y  | PY | PN | Low           | PY | N  | PN | NA | NA | PY | NA | Low           | Y  | NA | NA | NA | Low           | PN | PN | N   | NA | NA | Low           | PY | PN | PN | Low           | Low           |
| Kader 2012         | Y  | PY | PY | Some concerns | PY | PY | PY | PY | PN | PY | NA | High          | PN | PN | PY | PN | Some concerns | PN | PN | PY  | PY | PY | High          | PY | NI | NI | Some concerns | High          |
| Cuesta-Vargas 2012 | Y  | PY | PN | Low           | PY | PY | PN | NA | NA | PY | NA | Low           | PY | NA | NA | NA | Low           | PN | PN | PY  | PN | NA | Low           | PY | PN | PN | Low           | Low           |
| Tavafian 2011      | Y  | Y  | N  | Low           | Y  | N  | PN | NA | NA | PY | NA | Low           | PN | PY | NA | NA | Low           | PN | PN | N   | NA | NA | Low           | PY | NI | NI | Some concerns | Some concerns |
| Engbert 2011       | Y  | PY | PN | Low           | PY | PN | PN | NA | NA | PY | NA | Low           | PN | PY | NA | NA | Low           | PN | PN | PY  | PN | NA | Low           | PY | PN | PN | Low           | Low           |
| Glombiewski 2010   | Y  | PY | PN | Low           | PY | PY | PY | PN | NA | PY | NA | Some concerns | PY | NA | NA | NA | Low           | PN | PN | PY  | PY | PN | Some concerns | PY | NI | NI | Some concerns | Some concerns |
| Durmus 2010        | PY | PY | PN | Low           | PY | PY | PY | PY | PY | PY | NA | Some concerns | PN | PN | PN | NA | Low           | PN | PN | PY  | PY | PY | High          | PY | PY | PY | High          | High          |
| Williams 2009      | Y  | PY | PN | Low           | PY | PY | PY | PY | PY | PY | NA | Some concerns | PN | PN | PY | PN | Some concerns | PN | PN | PY  | PY | PN | Some concerns | PY | PN | PN | Low           | Some concerns |
| Sertpoyraz 2009    | PY | PY | PN | Low           | PY | PY | PY | PY | PY | PN | PY | High          | Y  | NA | NA | NA | Low           | PN | PN | PY  | PY | PY | High          | PY | NI | NI | Some concerns | High          |
| Ribeiro 2008       | PY | PY | PY | Some concerns | Y  | PN | PY | PY | PY | PY | NA | Some concerns | PN | PY | NA | NA | Low           | PN | PN | PY  | PN | NA | Low           | PY | NI | NI | Some concerns | Some concerns |
| Koldaş Doğan 2008  | Y  | PY | PN | Low           | PY | PY | PY | PY | PY | PY | NA | Some concerns | PY | NA | NA | NA | Low           | PN | PN | PY  | PY | PN | Some concerns | PY | NI | NI | Some concerns | Some concerns |
| Tavafian 2007      | Y  | PY | PN | Low           | Y  | PY | PY | PY | PY | PY | NA | Some concerns | PY | NA | NA | NA | Low           | PN | PN | PY  | PY | PN | Some concerns | PY | PN | PN | Low           | Some concerns |
| Kaapa 2006         | Y  | PY | NI | Low           | PY | PN | PN | NA | NA | PY | NA | Low           | PN | PY | NA | NA | Low           | PN | PN | NI  | PN | NA | Low           | PY | PN | PN | Low           | Low           |
| Galantino 2004     | Y  | Y  | PN | Low           | PY | PY | PY | PY | PY | PY | NA | Some concerns | PN | PY | NA | NA | Low           | PN | PN | PY  | PY | PN | Some concerns | PY | NI | NI | Some concerns | Some concerns |
| Weiner 2003        | Y  | PY | PN | Low           | PY | PY | PY | PN | NA | PY | NA | Some concerns | PY | NA | NA | NA | Low           | PN | PN | PY  | PN | NA | Low           | PY | PN | PN | Low           | Some concerns |
| Niemisto 2003      | Y  | PY | PN | Low           | PY | PY | PY | PY | PY | PY | NA | Some concerns | PN | PN | PY | PN | Some concerns | PN | PY | N A | NA | NA | High          | PY | NI | NI | Some concerns | High          |

|                     |    |    |    |               |    |    |    |    |    |    |    |               |    |    |    |    |               |    |    |    |    |    |               |    |    |    |               |               |
|---------------------|----|----|----|---------------|----|----|----|----|----|----|----|---------------|----|----|----|----|---------------|----|----|----|----|----|---------------|----|----|----|---------------|---------------|
| Hernandez-Reif 2001 | Y  | NI | PN | Some concerns | PY | PY | PY | PN | NA | PY | NA | Some concerns | PY | NA | NA | NA | Low           | PN | PN | PY | PN | NA | Low           | PY | NI | NI | Some concerns | Some concerns |
| Newton-John 1995    | PY | PY | NI | Low           | PY | PY | PY | PY | PY | PN | PN | Some concerns | PN | PN | PY | PN | Some concerns | PN | PN | PY | PN | NA | Low           | PY | NI | NI | Some concerns | Some concerns |
| Turner 1993         | PY | PY | PY | Some concerns | PY | PY | PN | NA | NA | PY | NA | Low           | PN | PN | Y  | PY | High          | PN | PN | PY | PY | PN | Some concerns | PY | NI | NI | Some concerns | High          |

Notes: RoB, risk of bias; High, High risk of bias; Low, Low risk of bias; NI, no information; NA, not applicable; N, No; PN, Probably No; PY, Probably Yes; Y, Yes.

Appendix 5. Detailed results of each domain on risk of bias assessment using Risk of bias 2 on included randomized controlled trials

| Author                     | D1 | D2 | D3 | D4 | D5 | Overall |
|----------------------------|----|----|----|----|----|---------|
| Sıgılan 2023               | +  | +  | +  | +  | +  | +       |
| Sanabria-Mazo 2023         | +  | +  | +  | +  | !  | !       |
| Ogunniran 2023             | +  | !  | +  | +  | +  | !       |
| Lazaridou 2023             | !  | +  | !  | +  | !  | !       |
| Kim 2023                   | +  | !  | +  | +  | +  | !       |
| Kanaan 2023                | +  | !  | +  | +  | +  | !       |
| Groenveld 2023             | +  | !  | !  | +  | +  | !       |
| Zheng 2022                 | +  | !  | +  | +  | +  | !       |
| Singphow 2022              | +  | !  | +  | +  | +  | !       |
| Shaygan 2022               | -  | -  | -  | +  | !  | -       |
| Rim 2022                   | +  | !  | !  | -  | !  | -       |
| Lara-Palomo 2022           | +  | +  | +  | +  | !  | !       |
| Kızıldaş 2022              | +  | !  | -  | -  | !  | -       |
| Hrkać 2022                 | +  | +  | +  | +  | +  | +       |
| Diez 2022                  | +  | !  | +  | +  | +  | !       |
| Aguilar-Ferrándiz 2022     | +  | +  | +  | +  | !  | !       |
| Yakşi 2021                 | +  | +  | +  | -  | !  | -       |
| Schmidt 2021               | -  | !  | -  | +  | +  | -       |
| Polaski 2021               | +  | +  | +  | !  | !  | !       |
| Karaarslan 2021            | +  | +  | !  | +  | !  | !       |
| Darnall 2021               | +  | +  | +  | +  | +  | +       |
| Batbay 2021                | +  | +  | +  | -  | !  | -       |
| Alzahrani 2021             | +  | +  | +  | !  | !  | !       |
| Ünal 2020                  | +  | !  | +  | +  | !  | !       |
| Soleymani 2020             | +  | +  | !  | !  | !  | !       |
| Schlicker 2020             | +  | !  | +  | -  | +  | -       |
| de Oliveira Meirelles 2020 | +  | +  | +  | +  | !  | !       |
| Suh 2019                   | !  | !  | +  | +  | !  | !       |

|                    |   |   |   |   |   |   |
|--------------------|---|---|---|---|---|---|
| Petrozzi 2019      | ! | + | ! | + | ! | ! |
| Mariano 2019       | ! | + | + | + | ! | ! |
| Hüppe 2019         | + | ! | - | + | ! | - |
| Huber 2019         | + | ! | + | - | ! | - |
| Gardner 2019       | + | + | + | + | + | + |
| Kuvacic 2018       | ! | ! | + | + | ! | ! |
| Hohmann 2018       | ! | - | - | ! | - | - |
| Glombiewski 2018   | ! | ! | + | + | ! | ! |
| Tüzün 2017         | ! | + | + | + | ! | ! |
| Seo 2017           | + | + | + | + | + | + |
| Nayback-Beebe 2017 | ! | ! | + | - | ! | - |
| Kumar 2017         | + | + | + | ! | ! | ! |
| Harris 2017        | + | ! | ! | - | ! | - |
| Michalsen 2016     | + | ! | ! | ! | + | ! |
| Trapp 2015         | ! | - | + | - | + | - |
| Lawand 2015        | + | + | + | + | + | + |
| Kogure 2015        | + | + | + | ! | ! | ! |
| Zhang 2014         | + | ! | + | - | - | - |
| Monticone 2014     | + | ! | + | ! | ! | ! |
| Tekur 2012         | + | + | + | + | + | + |
| Kader 2012         | ! | - | ! | - | ! | - |
| Cuesta-Vargas 2012 | + | + | + | + | + | + |
| Tavafian 2011      | + | + | + | + | ! | ! |
| Engbert 2011       | + | + | + | + | + | + |
| Glombiewski 2010   | + | ! | + | ! | ! | ! |
| Durmus 2010        | + | ! | + | - | - | - |
| Williams 2009      | + | ! | ! | ! | + | ! |
| Sertpoyraz 2009    | + | - | + | - | ! | - |
| Ribeiro 2008       | ! | ! | + | + | ! | ! |
| Koldaş Doğan 2008  | + | ! | + | ! | ! | ! |

|                     |  |  |  |  |  |  |
|---------------------|--|--|--|--|--|--|
| Tavafian 2007       |  |  |  |  |  |  |
| Kaapa 2006          |  |  |  |  |  |  |
| Galantino 2004      |  |  |  |  |  |  |
| Weiner 2003         |  |  |  |  |  |  |
| Niemisto 2003       |  |  |  |  |  |  |
| Hernandez-Reif 2001 |  |  |  |  |  |  |
| Newton-John 1995    |  |  |  |  |  |  |
| Turner 1993         |  |  |  |  |  |  |

- Low risk
- Some concerns
- High risk

- D1 Randomisation process
- D2 Deviations from the intended interventions
- D3 Missing outcome data
- D4 Measurement of the outcome
- D5 Selection of the reported result

## Appendix 6. Detailed information of each trial for the risk of bias assessment

| Study                                                     | Siglan 2023                                                                                                                                                                         |            |
|-----------------------------------------------------------|-------------------------------------------------------------------------------------------------------------------------------------------------------------------------------------|------------|
| Domain                                                    | Signalling question                                                                                                                                                                 | Response   |
| <b>Bias arising from the randomization process</b>        | 1.1 Was the allocation sequence random?                                                                                                                                             | Y          |
|                                                           | 1.2 Was the allocation sequence concealed until participants were enrolled and assigned to interventions?                                                                           | PY         |
|                                                           | 1.3 Did baseline differences between intervention groups suggest a problem with the randomization process?                                                                          | N          |
|                                                           | <b>Risk of bias judgement</b>                                                                                                                                                       | <b>Low</b> |
| <b>Bias due to deviations from intended interventions</b> | 2.1. Were participants aware of their assigned intervention during the trial?                                                                                                       | N          |
|                                                           | 2.2. Were carers and people delivering the interventions aware of participants' assigned intervention during the trial?                                                             | N          |
|                                                           | 2.3. If Y/PY/NI to 2.1 or 2.2: Were there deviations from the intended intervention that arose because of the experimental context?                                                 | NA         |
|                                                           | 2.4 If Y/PY to 2.3: Were these deviations likely to have affected the outcome?                                                                                                      | NA         |
|                                                           | 2.5. If Y/PY/NI to 2.4: Were these deviations from intended intervention balanced between groups?                                                                                   | NA         |
|                                                           | 2.6 Was an appropriate analysis used to estimate the effect of assignment to intervention?                                                                                          | PY         |
|                                                           | 2.7 If N/PN/NI to 2.6: Was there potential for a substantial impact (on the result) of the failure to analyse participants in the group to which they were randomized?              | NA         |
| <b>Risk of bias judgement</b>                             | <b>Low</b>                                                                                                                                                                          |            |
| <b>Bias due to missing outcome data</b>                   | 3.1 Were data for this outcome available for all, or nearly all, participants randomized?                                                                                           | PY         |
|                                                           | 3.2 If N/PN/NI to 3.1: Is there evidence that result was not biased by missing outcome data?                                                                                        | NA         |
|                                                           | 3.3 If N/PN to 3.2: Could missingness in the outcome depend on its true value?                                                                                                      | NA         |
|                                                           | 3.4 If Y/PY/NI to 3.3: Is it likely that missingness in the outcome depended on its true value?                                                                                     | NA         |
|                                                           | <b>Risk of bias judgement</b>                                                                                                                                                       | <b>Low</b> |
| <b>Bias in measurement of the outcome</b>                 | 4.1 Was the method of measuring the outcome inappropriate?                                                                                                                          | N          |
|                                                           | 4.2 Could measurement or ascertainment of the outcome have differed between intervention groups?                                                                                    | PN         |
|                                                           | 4.3 Were outcome assessors aware of the intervention received by study participants?                                                                                                | N          |
|                                                           | 4.4 If Y/PY/NI to 4.3: Could assessment of the outcome have been influenced by knowledge of intervention received?                                                                  | NA         |
|                                                           | 4.5 If Y/PY/NI to 4.4: Is it likely that assessment of the outcome was influenced by knowledge of intervention received?                                                            | NA         |
| <b>Risk of bias judgement</b>                             | <b>Low</b>                                                                                                                                                                          |            |
| <b>Bias in selection of the reported result</b>           | 5.1 Were the data that produced this result analysed in accordance with a pre-specified analysis plan that was finalized before unblinded outcome data were available for analysis? | Y          |
|                                                           | 5.2 ... multiple eligible outcome measurements (e.g. scales, definitions, time points) within the outcome domain?                                                                   | PN         |
|                                                           | 5.3 ... multiple eligible analyses of the data?                                                                                                                                     | PN         |
|                                                           | <b>Risk of bias judgement</b>                                                                                                                                                       | <b>Low</b> |
| <b>Overall bias</b>                                       | <b>Risk of bias judgement</b>                                                                                                                                                       | <b>Low</b> |



| Study                                                     | Sanabria-Mazo 2023                                                                                                                                                                  |                      |
|-----------------------------------------------------------|-------------------------------------------------------------------------------------------------------------------------------------------------------------------------------------|----------------------|
| Domain                                                    | Signalling question                                                                                                                                                                 | Response             |
| <b>Bias arising from the randomization process</b>        | 1.1 Was the allocation sequence random?                                                                                                                                             | Y                    |
|                                                           | 1.2 Was the allocation sequence concealed until participants were enrolled and assigned to interventions?                                                                           | Y                    |
|                                                           | 1.3 Did baseline differences between intervention groups suggest a problem with the randomization process?                                                                          | N                    |
|                                                           | <b>Risk of bias judgement</b>                                                                                                                                                       | <b>Low</b>           |
| <b>Bias due to deviations from intended interventions</b> | 2.1. Were participants aware of their assigned intervention during the trial?                                                                                                       | PY                   |
|                                                           | 2.2. Were carers and people delivering the interventions aware of participants' assigned intervention during the trial?                                                             | PY                   |
|                                                           | 2.3. If Y/PY/NI to 2.1 or 2.2: Were there deviations from the intended intervention that arose because of the experimental context?                                                 | PN                   |
|                                                           | 2.4 If Y/PY to 2.3: Were these deviations likely to have affected the outcome?                                                                                                      | NA                   |
|                                                           | 2.5. If Y/PY/NI to 2.4: Were these deviations from intended intervention balanced between groups?                                                                                   | NA                   |
|                                                           | 2.6 Was an appropriate analysis used to estimate the effect of assignment to intervention?                                                                                          | PY                   |
|                                                           | 2.7 If N/PN/NI to 2.6: Was there potential for a substantial impact (on the result) of the failure to analyse participants in the group to which they were randomized?              | NA                   |
| <b>Risk of bias judgement</b>                             | <b>Low</b>                                                                                                                                                                          |                      |
| <b>Bias due to missing outcome data</b>                   | 3.1 Were data for this outcome available for all, or nearly all, participants randomized?                                                                                           | PY                   |
|                                                           | 3.2 If N/PN/NI to 3.1: Is there evidence that result was not biased by missing outcome data?                                                                                        | NA                   |
|                                                           | 3.3 If N/PN to 3.2: Could missingness in the outcome depend on its true value?                                                                                                      | NA                   |
|                                                           | 3.4 If Y/PY/NI to 3.3: Is it likely that missingness in the outcome depended on its true value?                                                                                     | NA                   |
|                                                           | <b>Risk of bias judgement</b>                                                                                                                                                       | <b>Low</b>           |
| <b>Bias in measurement of the outcome</b>                 | 4.1 Was the method of measuring the outcome inappropriate?                                                                                                                          | PN                   |
|                                                           | 4.2 Could measurement or ascertainment of the outcome have differed between intervention groups?                                                                                    | PN                   |
|                                                           | 4.3 Were outcome assessors aware of the intervention received by study participants?                                                                                                | PY                   |
|                                                           | 4.4 If Y/PY/NI to 4.3: Could assessment of the outcome have been influenced by knowledge of intervention received?                                                                  | PN                   |
|                                                           | 4.5 If Y/PY/NI to 4.4: Is it likely that assessment of the outcome was influenced by knowledge of intervention received?                                                            | NA                   |
|                                                           | <b>Risk of bias judgement</b>                                                                                                                                                       | <b>Low</b>           |
| <b>Bias in selection of the reported result</b>           | 5.1 Were the data that produced this result analysed in accordance with a pre-specified analysis plan that was finalized before unblinded outcome data were available for analysis? | PY                   |
|                                                           | 5.2 ... multiple eligible outcome measurements (e.g. scales, definitions, time points) within the outcome domain?                                                                   | NI                   |
|                                                           | 5.3 ... multiple eligible analyses of the data?                                                                                                                                     | NI                   |
|                                                           | <b>Risk of bias judgement</b>                                                                                                                                                       | <b>Some concerns</b> |
| <b>Overall bias</b>                                       | <b>Risk of bias judgement</b>                                                                                                                                                       | <b>Some concerns</b> |

| Study                                                     | Ogunniran 2023                                                                                                                                                                      |                      |
|-----------------------------------------------------------|-------------------------------------------------------------------------------------------------------------------------------------------------------------------------------------|----------------------|
| Domain                                                    | Signalling question                                                                                                                                                                 | Response             |
| <b>Bias arising from the randomization process</b>        | 1.1 Was the allocation sequence random?                                                                                                                                             | Y                    |
|                                                           | 1.2 Was the allocation sequence concealed until participants were enrolled and assigned to interventions?                                                                           | Y                    |
|                                                           | 1.3 Did baseline differences between intervention groups suggest a problem with the randomization process?                                                                          | PN                   |
|                                                           | <b>Risk of bias judgement</b>                                                                                                                                                       | <b>Low</b>           |
| <b>Bias due to deviations from intended interventions</b> | 2.1. Were participants aware of their assigned intervention during the trial?                                                                                                       | PY                   |
|                                                           | 2.2. Were carers and people delivering the interventions aware of participants' assigned intervention during the trial?                                                             | Y                    |
|                                                           | 2.3. If Y/PY/NI to 2.1 or 2.2: Were there deviations from the intended intervention that arose because of the experimental context?                                                 | PN                   |
|                                                           | 2.4 If Y/PY to 2.3: Were these deviations likely to have affected the outcome?                                                                                                      | NA                   |
|                                                           | 2.5. If Y/PY/NI to 2.4: Were these deviations from intended intervention balanced between groups?                                                                                   | NA                   |
|                                                           | 2.6 Was an appropriate analysis used to estimate the effect of assignment to intervention?                                                                                          | PN                   |
|                                                           | 2.7 If N/PN/NI to 2.6: Was there potential for a substantial impact (on the result) of the failure to analyse participants in the group to which they were randomized?              | PN                   |
| <b>Risk of bias judgement</b>                             | <b>Some concerns</b>                                                                                                                                                                |                      |
| <b>Bias due to missing outcome data</b>                   | 3.1 Were data for this outcome available for all, or nearly all, participants randomized?                                                                                           | PN                   |
|                                                           | 3.2 If N/PN/NI to 3.1: Is there evidence that result was not biased by missing outcome data?                                                                                        | PY                   |
|                                                           | 3.3 If N/PN to 3.2: Could missingness in the outcome depend on its true value?                                                                                                      | NA                   |
|                                                           | 3.4 If Y/PY/NI to 3.3: Is it likely that missingness in the outcome depended on its true value?                                                                                     | NA                   |
|                                                           | <b>Risk of bias judgement</b>                                                                                                                                                       | <b>Low</b>           |
| <b>Bias in measurement of the outcome</b>                 | 4.1 Was the method of measuring the outcome inappropriate?                                                                                                                          | PN                   |
|                                                           | 4.2 Could measurement or ascertainment of the outcome have differed between intervention groups?                                                                                    | PN                   |
|                                                           | 4.3 Were outcome assessors aware of the intervention received by study participants?                                                                                                | PY                   |
|                                                           | 4.4 If Y/PY/NI to 4.3: Could assessment of the outcome have been influenced by knowledge of intervention received?                                                                  | PN                   |
|                                                           | 4.5 If Y/PY/NI to 4.4: Is it likely that assessment of the outcome was influenced by knowledge of intervention received?                                                            | NA                   |
|                                                           | <b>Risk of bias judgement</b>                                                                                                                                                       | <b>Low</b>           |
| <b>Bias in selection of the reported result</b>           | 5.1 Were the data that produced this result analysed in accordance with a pre-specified analysis plan that was finalized before unblinded outcome data were available for analysis? | PY                   |
|                                                           | 5.2 ... multiple eligible outcome measurements (e.g. scales, definitions, time points) within the outcome domain?                                                                   | PN                   |
|                                                           | 5.3 ... multiple eligible analyses of the data?                                                                                                                                     | PN                   |
|                                                           | <b>Risk of bias judgement</b>                                                                                                                                                       | <b>Low</b>           |
| <b>Overall bias</b>                                       | <b>Risk of bias judgement</b>                                                                                                                                                       | <b>Some concerns</b> |

| Study                                                     | Lazaridou 2023                                                                                                                                                                      |                      |
|-----------------------------------------------------------|-------------------------------------------------------------------------------------------------------------------------------------------------------------------------------------|----------------------|
| Domain                                                    | Signalling question                                                                                                                                                                 | Response             |
| <b>Bias arising from the randomization process</b>        | 1.1 Was the allocation sequence random?                                                                                                                                             | Y                    |
|                                                           | 1.2 Was the allocation sequence concealed until participants were enrolled and assigned to interventions?                                                                           | NI                   |
|                                                           | 1.3 Did baseline differences between intervention groups suggest a problem with the randomization process?                                                                          | NI                   |
|                                                           | <b>Risk of bias judgement</b>                                                                                                                                                       | <b>Some concerns</b> |
| <b>Bias due to deviations from intended interventions</b> | 2.1. Were participants aware of their assigned intervention during the trial?                                                                                                       | NI                   |
|                                                           | 2.2. Were carers and people delivering the interventions aware of participants' assigned intervention during the trial?                                                             | PY                   |
|                                                           | 2.3. If Y/PY/NI to 2.1 or 2.2: Were there deviations from the intended intervention that arose because of the experimental context?                                                 | PN                   |
|                                                           | 2.4 If Y/PY to 2.3: Were these deviations likely to have affected the outcome?                                                                                                      | NA                   |
|                                                           | 2.5. If Y/PY/NI to 2.4: Were these deviations from intended intervention balanced between groups?                                                                                   | NA                   |
|                                                           | 2.6 Was an appropriate analysis used to estimate the effect of assignment to intervention?                                                                                          | PY                   |
|                                                           | 2.7 If N/PN/NI to 2.6: Was there potential for a substantial impact (on the result) of the failure to analyse participants in the group to which they were randomized?              | NA                   |
|                                                           | <b>Risk of bias judgement</b>                                                                                                                                                       | <b>Low</b>           |
| <b>Bias due to missing outcome data</b>                   | 3.1 Were data for this outcome available for all, or nearly all, participants randomized?                                                                                           | PN                   |
|                                                           | 3.2 If N/PN/NI to 3.1: Is there evidence that result was not biased by missing outcome data?                                                                                        | PN                   |
|                                                           | 3.3 If N/PN to 3.2: Could missingness in the outcome depend on its true value?                                                                                                      | PY                   |
|                                                           | 3.4 If Y/PY/NI to 3.3: Is it likely that missingness in the outcome depended on its true value?                                                                                     | PN                   |
|                                                           | <b>Risk of bias judgement</b>                                                                                                                                                       | <b>Some concerns</b> |
| <b>Bias in measurement of the outcome</b>                 | 4.1 Was the method of measuring the outcome inappropriate?                                                                                                                          | PN                   |
|                                                           | 4.2 Could measurement or ascertainment of the outcome have differed between intervention groups?                                                                                    | PN                   |
|                                                           | 4.3 Were outcome assessors aware of the intervention received by study participants?                                                                                                | PY                   |
|                                                           | 4.4 If Y/PY/NI to 4.3: Could assessment of the outcome have been influenced by knowledge of intervention received?                                                                  | PN                   |
|                                                           | 4.5 If Y/PY/NI to 4.4: Is it likely that assessment of the outcome was influenced by knowledge of intervention received?                                                            | NA                   |
|                                                           | <b>Risk of bias judgement</b>                                                                                                                                                       | <b>Low</b>           |
| <b>Bias in selection of the reported result</b>           | 5.1 Were the data that produced this result analysed in accordance with a pre-specified analysis plan that was finalized before unblinded outcome data were available for analysis? | PY                   |
|                                                           | 5.2 ... multiple eligible outcome measurements (e.g. scales, definitions, time points) within the outcome domain?                                                                   | NI                   |
|                                                           | 5.3 ... multiple eligible analyses of the data?                                                                                                                                     | NI                   |
|                                                           | <b>Risk of bias judgement</b>                                                                                                                                                       | <b>Some concerns</b> |
| <b>Overall bias</b>                                       | <b>Risk of bias judgement</b>                                                                                                                                                       | <b>Some concerns</b> |

| Study                                                     | Kim 2023                                                                                                                                                                            |                      |
|-----------------------------------------------------------|-------------------------------------------------------------------------------------------------------------------------------------------------------------------------------------|----------------------|
| Domain                                                    | Signalling question                                                                                                                                                                 | Response             |
| <b>Bias arising from the randomization process</b>        | 1.1 Was the allocation sequence random?                                                                                                                                             | Y                    |
|                                                           | 1.2 Was the allocation sequence concealed until participants were enrolled and assigned to interventions?                                                                           | Y                    |
|                                                           | 1.3 Did baseline differences between intervention groups suggest a problem with the randomization process?                                                                          | PN                   |
|                                                           | <b>Risk of bias judgement</b>                                                                                                                                                       | <b>Low</b>           |
| <b>Bias due to deviations from intended interventions</b> | 2.1. Were participants aware of their assigned intervention during the trial?                                                                                                       | PN                   |
|                                                           | 2.2. Were carers and people delivering the interventions aware of participants' assigned intervention during the trial?                                                             | PY                   |
|                                                           | 2.3. If Y/PY/NI to 2.1 or 2.2: Were there deviations from the intended intervention that arose because of the experimental context?                                                 | PY                   |
|                                                           | 2.4 If Y/PY to 2.3: Were these deviations likely to have affected the outcome?                                                                                                      | PY                   |
|                                                           | 2.5. If Y/PY/NI to 2.4: Were these deviations from intended intervention balanced between groups?                                                                                   | PY                   |
|                                                           | 2.6 Was an appropriate analysis used to estimate the effect of assignment to intervention?                                                                                          | NI                   |
|                                                           | 2.7 If N/PN/NI to 2.6: Was there potential for a substantial impact (on the result) of the failure to analyse participants in the group to which they were randomized?              | PN                   |
| <b>Risk of bias judgement</b>                             | <b>Some concerns</b>                                                                                                                                                                |                      |
| <b>Bias due to missing outcome data</b>                   | 3.1 Were data for this outcome available for all, or nearly all, participants randomized?                                                                                           | PY                   |
|                                                           | 3.2 If N/PN/NI to 3.1: Is there evidence that result was not biased by missing outcome data?                                                                                        | NA                   |
|                                                           | 3.3 If N/PN to 3.2: Could missingness in the outcome depend on its true value?                                                                                                      | NA                   |
|                                                           | 3.4 If Y/PY/NI to 3.3: Is it likely that missingness in the outcome depended on its true value?                                                                                     | NA                   |
|                                                           | <b>Risk of bias judgement</b>                                                                                                                                                       | <b>Low</b>           |
| <b>Bias in measurement of the outcome</b>                 | 4.1 Was the method of measuring the outcome inappropriate?                                                                                                                          | PN                   |
|                                                           | 4.2 Could measurement or ascertainment of the outcome have differed between intervention groups?                                                                                    | PN                   |
|                                                           | 4.3 Were outcome assessors aware of the intervention received by study participants?                                                                                                | Y                    |
|                                                           | 4.4 If Y/PY/NI to 4.3: Could assessment of the outcome have been influenced by knowledge of intervention received?                                                                  | PN                   |
|                                                           | 4.5 If Y/PY/NI to 4.4: Is it likely that assessment of the outcome was influenced by knowledge of intervention received?                                                            | NA                   |
|                                                           | <b>Risk of bias judgement</b>                                                                                                                                                       | <b>Low</b>           |
| <b>Bias in selection of the reported result</b>           | 5.1 Were the data that produced this result analysed in accordance with a pre-specified analysis plan that was finalized before unblinded outcome data were available for analysis? | PY                   |
|                                                           | 5.2 ... multiple eligible outcome measurements (e.g. scales, definitions, time points) within the outcome domain?                                                                   | PN                   |
|                                                           | 5.3 ... multiple eligible analyses of the data?                                                                                                                                     | PN                   |
|                                                           | <b>Risk of bias judgement</b>                                                                                                                                                       | <b>Low</b>           |
| <b>Overall bias</b>                                       | <b>Risk of bias judgement</b>                                                                                                                                                       | <b>Some concerns</b> |

| Study                                              | Kanaan 2023                                                                                                                                                                         |                      |
|----------------------------------------------------|-------------------------------------------------------------------------------------------------------------------------------------------------------------------------------------|----------------------|
| Domain                                             | Signalling question                                                                                                                                                                 | Response             |
| Bias arising from the randomization process        | 1.1 Was the allocation sequence random?                                                                                                                                             | Y                    |
|                                                    | 1.2 Was the allocation sequence concealed until participants were enrolled and assigned to interventions?                                                                           | PY                   |
|                                                    | 1.3 Did baseline differences between intervention groups suggest a problem with the randomization process?                                                                          | PN                   |
|                                                    | <b>Risk of bias judgement</b>                                                                                                                                                       | <b>Low</b>           |
| Bias due to deviations from intended interventions | 2.1. Were participants aware of their assigned intervention during the trial?                                                                                                       | PY                   |
|                                                    | 2.2. Were carers and people delivering the interventions aware of participants' assigned intervention during the trial?                                                             | PY                   |
|                                                    | 2.3. If Y/PY/NI to 2.1 or 2.2: Were there deviations from the intended intervention that arose because of the experimental context?                                                 | PY                   |
|                                                    | 2.4 If Y/PY to 2.3: Were these deviations likely to have affected the outcome?                                                                                                      | PN                   |
|                                                    | 2.5. If Y/PY/NI to 2.4: Were these deviations from intended intervention balanced between groups?                                                                                   | NA                   |
|                                                    | 2.6 Was an appropriate analysis used to estimate the effect of assignment to intervention?                                                                                          | PY                   |
|                                                    | 2.7 If N/PN/NI to 2.6: Was there potential for a substantial impact (on the result) of the failure to analyse participants in the group to which they were randomized?              | NA                   |
| <b>Risk of bias judgement</b>                      | <b>Some concerns</b>                                                                                                                                                                |                      |
| Bias due to missing outcome data                   | 3.1 Were data for this outcome available for all, or nearly all, participants randomized?                                                                                           | PN                   |
|                                                    | 3.2 If N/PN/NI to 3.1: Is there evidence that result was not biased by missing outcome data?                                                                                        | PY                   |
|                                                    | 3.3 If N/PN to 3.2: Could missingness in the outcome depend on its true value?                                                                                                      | NA                   |
|                                                    | 3.4 If Y/PY/NI to 3.3: Is it likely that missingness in the outcome depended on its true value?                                                                                     | NA                   |
|                                                    | <b>Risk of bias judgement</b>                                                                                                                                                       | <b>Low</b>           |
| Bias in measurement of the outcome                 | 4.1 Was the method of measuring the outcome inappropriate?                                                                                                                          | PN                   |
|                                                    | 4.2 Could measurement or ascertainment of the outcome have differed between intervention groups?                                                                                    | PN                   |
|                                                    | 4.3 Were outcome assessors aware of the intervention received by study participants?                                                                                                | PN                   |
|                                                    | 4.4 If Y/PY/NI to 4.3: Could assessment of the outcome have been influenced by knowledge of intervention received?                                                                  | NA                   |
|                                                    | 4.5 If Y/PY/NI to 4.4: Is it likely that assessment of the outcome was influenced by knowledge of intervention received?                                                            | NA                   |
|                                                    | <b>Risk of bias judgement</b>                                                                                                                                                       | <b>Low</b>           |
| Bias in selection of the reported result           | 5.1 Were the data that produced this result analysed in accordance with a pre-specified analysis plan that was finalized before unblinded outcome data were available for analysis? | PY                   |
|                                                    | 5.2 ... multiple eligible outcome measurements (e.g. scales, definitions, time points) within the outcome domain?                                                                   | PN                   |
|                                                    | 5.3 ... multiple eligible analyses of the data?                                                                                                                                     | PN                   |
|                                                    | <b>Risk of bias judgement</b>                                                                                                                                                       | <b>Low</b>           |
| Overall bias                                       | <b>Risk of bias judgement</b>                                                                                                                                                       | <b>Some concerns</b> |

| Study                                              | Groenveld 2023                                                                                                                                                                      |                      |
|----------------------------------------------------|-------------------------------------------------------------------------------------------------------------------------------------------------------------------------------------|----------------------|
| Domain                                             | Signalling question                                                                                                                                                                 | Response             |
| Bias arising from the randomization process        | 1.1 Was the allocation sequence random?                                                                                                                                             | Y                    |
|                                                    | 1.2 Was the allocation sequence concealed until participants were enrolled and assigned to interventions?                                                                           | PY                   |
|                                                    | 1.3 Did baseline differences between intervention groups suggest a problem with the randomization process?                                                                          | PN                   |
|                                                    | <b>Risk of bias judgement</b>                                                                                                                                                       | <b>Low</b>           |
| Bias due to deviations from intended interventions | 2.1. Were participants aware of their assigned intervention during the trial?                                                                                                       | PY                   |
|                                                    | 2.2. Were carers and people delivering the interventions aware of participants' assigned intervention during the trial?                                                             | PN                   |
|                                                    | 2.3. If Y/PY/NI to 2.1 or 2.2: Were there deviations from the intended intervention that arose because of the experimental context?                                                 | PY                   |
|                                                    | 2.4 If Y/PY to 2.3: Were these deviations likely to have affected the outcome?                                                                                                      | PN                   |
|                                                    | 2.5. If Y/PY/NI to 2.4: Were these deviations from intended intervention balanced between groups?                                                                                   | NA                   |
|                                                    | 2.6 Was an appropriate analysis used to estimate the effect of assignment to intervention?                                                                                          | PY                   |
|                                                    | 2.7 If N/PN/NI to 2.6: Was there potential for a substantial impact (on the result) of the failure to analyse participants in the group to which they were randomized?              | NA                   |
| <b>Risk of bias judgement</b>                      | <b>Some concerns</b>                                                                                                                                                                |                      |
| Bias due to missing outcome data                   | 3.1 Were data for this outcome available for all, or nearly all, participants randomized?                                                                                           | PN                   |
|                                                    | 3.2 If N/PN/NI to 3.1: Is there evidence that result was not biased by missing outcome data?                                                                                        | PN                   |
|                                                    | 3.3 If N/PN to 3.2: Could missingness in the outcome depend on its true value?                                                                                                      | PY                   |
|                                                    | 3.4 If Y/PY/NI to 3.3: Is it likely that missingness in the outcome depended on its true value?                                                                                     | PN                   |
|                                                    | <b>Risk of bias judgement</b>                                                                                                                                                       | <b>Some concerns</b> |
| Bias in measurement of the outcome                 | 4.1 Was the method of measuring the outcome inappropriate?                                                                                                                          | PN                   |
|                                                    | 4.2 Could measurement or ascertainment of the outcome have differed between intervention groups?                                                                                    | PN                   |
|                                                    | 4.3 Were outcome assessors aware of the intervention received by study participants?                                                                                                | PY                   |
|                                                    | 4.4 If Y/PY/NI to 4.3: Could assessment of the outcome have been influenced by knowledge of intervention received?                                                                  | PN                   |
|                                                    | 4.5 If Y/PY/NI to 4.4: Is it likely that assessment of the outcome was influenced by knowledge of intervention received?                                                            | NA                   |
|                                                    | <b>Risk of bias judgement</b>                                                                                                                                                       | <b>Low</b>           |
| Bias in selection of the reported result           | 5.1 Were the data that produced this result analysed in accordance with a pre-specified analysis plan that was finalized before unblinded outcome data were available for analysis? | PY                   |
|                                                    | 5.2 ... multiple eligible outcome measurements (e.g. scales, definitions, time points) within the outcome domain?                                                                   | PN                   |
|                                                    | 5.3 ... multiple eligible analyses of the data?                                                                                                                                     | PN                   |
|                                                    | <b>Risk of bias judgement</b>                                                                                                                                                       | <b>Low</b>           |
| Overall bias                                       | <b>Risk of bias judgement</b>                                                                                                                                                       | <b>Some concerns</b> |

| Study                                                     | Zheng 2022                                                                                                                                                                          |                      |
|-----------------------------------------------------------|-------------------------------------------------------------------------------------------------------------------------------------------------------------------------------------|----------------------|
| Domain                                                    | Signalling question                                                                                                                                                                 | Response             |
| <b>Bias arising from the randomization process</b>        | 1.1 Was the allocation sequence random?                                                                                                                                             | Y                    |
|                                                           | 1.2 Was the allocation sequence concealed until participants were enrolled and assigned to interventions?                                                                           | Y                    |
|                                                           | 1.3 Did baseline differences between intervention groups suggest a problem with the randomization process?                                                                          | PN                   |
|                                                           | <b>Risk of bias judgement</b>                                                                                                                                                       | <b>Low</b>           |
| <b>Bias due to deviations from intended interventions</b> | 2.1. Were participants aware of their assigned intervention during the trial?                                                                                                       | PY                   |
|                                                           | 2.2. Were carers and people delivering the interventions aware of participants' assigned intervention during the trial?                                                             | PN                   |
|                                                           | 2.3. If Y/PY/NI to 2.1 or 2.2: Were there deviations from the intended intervention that arose because of the experimental context?                                                 | PY                   |
|                                                           | 2.4 If Y/PY to 2.3: Were these deviations likely to have affected the outcome?                                                                                                      | PN                   |
|                                                           | 2.5. If Y/PY/NI to 2.4: Were these deviations from intended intervention balanced between groups?                                                                                   | NA                   |
|                                                           | 2.6 Was an appropriate analysis used to estimate the effect of assignment to intervention?                                                                                          | PY                   |
|                                                           | 2.7 If N/PN/NI to 2.6: Was there potential for a substantial impact (on the result) of the failure to analyse participants in the group to which they were randomized?              | NA                   |
| <b>Risk of bias judgement</b>                             | <b>Some concerns</b>                                                                                                                                                                |                      |
| <b>Bias due to missing outcome data</b>                   | 3.1 Were data for this outcome available for all, or nearly all, participants randomized?                                                                                           | PY                   |
|                                                           | 3.2 If N/PN/NI to 3.1: Is there evidence that result was not biased by missing outcome data?                                                                                        | NA                   |
|                                                           | 3.3 If N/PN to 3.2: Could missingness in the outcome depend on its true value?                                                                                                      | NA                   |
|                                                           | 3.4 If Y/PY/NI to 3.3: Is it likely that missingness in the outcome depended on its true value?                                                                                     | NA                   |
|                                                           | <b>Risk of bias judgement</b>                                                                                                                                                       | <b>Low</b>           |
| <b>Bias in measurement of the outcome</b>                 | 4.1 Was the method of measuring the outcome inappropriate?                                                                                                                          | PN                   |
|                                                           | 4.2 Could measurement or ascertainment of the outcome have differed between intervention groups?                                                                                    | PN                   |
|                                                           | 4.3 Were outcome assessors aware of the intervention received by study participants?                                                                                                | N                    |
|                                                           | 4.4 If Y/PY/NI to 4.3: Could assessment of the outcome have been influenced by knowledge of intervention received?                                                                  | NA                   |
|                                                           | 4.5 If Y/PY/NI to 4.4: Is it likely that assessment of the outcome was influenced by knowledge of intervention received?                                                            | NA                   |
|                                                           | <b>Risk of bias judgement</b>                                                                                                                                                       | <b>Low</b>           |
| <b>Bias in selection of the reported result</b>           | 5.1 Were the data that produced this result analysed in accordance with a pre-specified analysis plan that was finalized before unblinded outcome data were available for analysis? | PY                   |
|                                                           | 5.2 ... multiple eligible outcome measurements (e.g. scales, definitions, time points) within the outcome domain?                                                                   | PN                   |
|                                                           | 5.3 ... multiple eligible analyses of the data?                                                                                                                                     | PN                   |
|                                                           | <b>Risk of bias judgement</b>                                                                                                                                                       | <b>Low</b>           |
| <b>Overall bias</b>                                       | <b>Risk of bias judgement</b>                                                                                                                                                       | <b>Some concerns</b> |

| Study                                                     | Singphow 2022                                                                                                                                                                       |                      |
|-----------------------------------------------------------|-------------------------------------------------------------------------------------------------------------------------------------------------------------------------------------|----------------------|
| Domain                                                    | Signalling question                                                                                                                                                                 | Response             |
| <b>Bias arising from the randomization process</b>        | 1.1 Was the allocation sequence random?                                                                                                                                             | Y                    |
|                                                           | 1.2 Was the allocation sequence concealed until participants were enrolled and assigned to interventions?                                                                           | Y                    |
|                                                           | 1.3 Did baseline differences between intervention groups suggest a problem with the randomization process?                                                                          | PN                   |
|                                                           | <b>Risk of bias judgement</b>                                                                                                                                                       | <b>Low</b>           |
| <b>Bias due to deviations from intended interventions</b> | 2.1. Were participants aware of their assigned intervention during the trial?                                                                                                       | PY                   |
|                                                           | 2.2. Were carers and people delivering the interventions aware of participants' assigned intervention during the trial?                                                             | PY                   |
|                                                           | 2.3. If Y/PY/NI to 2.1 or 2.2: Were there deviations from the intended intervention that arose because of the experimental context?                                                 | PY                   |
|                                                           | 2.4 If Y/PY to 2.3: Were these deviations likely to have affected the outcome?                                                                                                      | PN                   |
|                                                           | 2.5. If Y/PY/NI to 2.4: Were these deviations from intended intervention balanced between groups?                                                                                   | NA                   |
|                                                           | 2.6 Was an appropriate analysis used to estimate the effect of assignment to intervention?                                                                                          | PY                   |
|                                                           | 2.7 If N/PN/NI to 2.6: Was there potential for a substantial impact (on the result) of the failure to analyse participants in the group to which they were randomized?              | NA                   |
| <b>Risk of bias judgement</b>                             | <b>Some concerns</b>                                                                                                                                                                |                      |
| <b>Bias due to missing outcome data</b>                   | 3.1 Were data for this outcome available for all, or nearly all, participants randomized?                                                                                           | PY                   |
|                                                           | 3.2 If N/PN/NI to 3.1: Is there evidence that result was not biased by missing outcome data?                                                                                        | NA                   |
|                                                           | 3.3 If N/PN to 3.2: Could missingness in the outcome depend on its true value?                                                                                                      | NA                   |
|                                                           | 3.4 If Y/PY/NI to 3.3: Is it likely that missingness in the outcome depended on its true value?                                                                                     | NA                   |
|                                                           | <b>Risk of bias judgement</b>                                                                                                                                                       | <b>Low</b>           |
| <b>Bias in measurement of the outcome</b>                 | 4.1 Was the method of measuring the outcome inappropriate?                                                                                                                          | PN                   |
|                                                           | 4.2 Could measurement or ascertainment of the outcome have differed between intervention groups?                                                                                    | PN                   |
|                                                           | 4.3 Were outcome assessors aware of the intervention received by study participants?                                                                                                | N                    |
|                                                           | 4.4 If Y/PY/NI to 4.3: Could assessment of the outcome have been influenced by knowledge of intervention received?                                                                  | NA                   |
|                                                           | 4.5 If Y/PY/NI to 4.4: Is it likely that assessment of the outcome was influenced by knowledge of intervention received?                                                            | NA                   |
|                                                           | <b>Risk of bias judgement</b>                                                                                                                                                       | <b>Low</b>           |
| <b>Bias in selection of the reported result</b>           | 5.1 Were the data that produced this result analysed in accordance with a pre-specified analysis plan that was finalized before unblinded outcome data were available for analysis? | PY                   |
|                                                           | 5.2 ... multiple eligible outcome measurements (e.g. scales, definitions, time points) within the outcome domain?                                                                   | PN                   |
|                                                           | 5.3 ... multiple eligible analyses of the data?                                                                                                                                     | PN                   |
|                                                           | <b>Risk of bias judgement</b>                                                                                                                                                       | <b>Low</b>           |
| <b>Overall bias</b>                                       | <b>Risk of bias judgement</b>                                                                                                                                                       | <b>Some concerns</b> |



| Study                                                     | Shaygan 2022                                                                                                                                                                        |                      |
|-----------------------------------------------------------|-------------------------------------------------------------------------------------------------------------------------------------------------------------------------------------|----------------------|
| Domain                                                    | Signalling question                                                                                                                                                                 | Response             |
| <b>Bias arising from the randomization process</b>        | 1.1 Was the allocation sequence random?                                                                                                                                             | Y                    |
|                                                           | 1.2 Was the allocation sequence concealed until participants were enrolled and assigned to interventions?                                                                           | N                    |
|                                                           | 1.3 Did baseline differences between intervention groups suggest a problem with the randomization process?                                                                          | PN                   |
|                                                           | <b>Risk of bias judgement</b>                                                                                                                                                       | <b>High</b>          |
| <b>Bias due to deviations from intended interventions</b> | 2.1. Were participants aware of their assigned intervention during the trial?                                                                                                       | Y                    |
|                                                           | 2.2. Were carers and people delivering the interventions aware of participants' assigned intervention during the trial?                                                             | Y                    |
|                                                           | 2.3. If Y/PY/NI to 2.1 or 2.2: Were there deviations from the intended intervention that arose because of the experimental context?                                                 | PY                   |
|                                                           | 2.4 If Y/PY to 2.3: Were these deviations likely to have affected the outcome?                                                                                                      | PY                   |
|                                                           | 2.5. If Y/PY/NI to 2.4: Were these deviations from intended intervention balanced between groups?                                                                                   | PN                   |
|                                                           | 2.6 Was an appropriate analysis used to estimate the effect of assignment to intervention?                                                                                          | PY                   |
|                                                           | 2.7 If N/PN/NI to 2.6: Was there potential for a substantial impact (on the result) of the failure to analyse participants in the group to which they were randomized?              | NA                   |
| <b>Risk of bias judgement</b>                             | <b>High</b>                                                                                                                                                                         |                      |
| <b>Bias due to missing outcome data</b>                   | 3.1 Were data for this outcome available for all, or nearly all, participants randomized?                                                                                           | NI                   |
|                                                           | 3.2 If N/PN/NI to 3.1: Is there evidence that result was not biased by missing outcome data?                                                                                        | PN                   |
|                                                           | 3.3 If N/PN to 3.2: Could missingness in the outcome depend on its true value?                                                                                                      | PY                   |
|                                                           | 3.4 If Y/PY/NI to 3.3: Is it likely that missingness in the outcome depended on its true value?                                                                                     | PY                   |
|                                                           | <b>Risk of bias judgement</b>                                                                                                                                                       | <b>High</b>          |
| <b>Bias in measurement of the outcome</b>                 | 4.1 Was the method of measuring the outcome inappropriate?                                                                                                                          | PN                   |
|                                                           | 4.2 Could measurement or ascertainment of the outcome have differed between intervention groups?                                                                                    | PN                   |
|                                                           | 4.3 Were outcome assessors aware of the intervention received by study participants?                                                                                                | PY                   |
|                                                           | 4.4 If Y/PY/NI to 4.3: Could assessment of the outcome have been influenced by knowledge of intervention received?                                                                  | PN                   |
|                                                           | 4.5 If Y/PY/NI to 4.4: Is it likely that assessment of the outcome was influenced by knowledge of intervention received?                                                            | NA                   |
|                                                           | <b>Risk of bias judgement</b>                                                                                                                                                       | <b>Low</b>           |
| <b>Bias in selection of the reported result</b>           | 5.1 Were the data that produced this result analysed in accordance with a pre-specified analysis plan that was finalized before unblinded outcome data were available for analysis? | PN                   |
|                                                           | 5.2 ... multiple eligible outcome measurements (e.g. scales, definitions, time points) within the outcome domain?                                                                   | NI                   |
|                                                           | 5.3 ... multiple eligible analyses of the data?                                                                                                                                     | NI                   |
|                                                           | <b>Risk of bias judgement</b>                                                                                                                                                       | <b>Some concerns</b> |
| <b>Overall bias</b>                                       | <b>Risk of bias judgement</b>                                                                                                                                                       | <b>High</b>          |

| Study                                                     | Rim 2022                                                                                                                                                                            |                      |
|-----------------------------------------------------------|-------------------------------------------------------------------------------------------------------------------------------------------------------------------------------------|----------------------|
| Domain                                                    | Signalling question                                                                                                                                                                 | Response             |
| <b>Bias arising from the randomization process</b>        | 1.1 Was the allocation sequence random?                                                                                                                                             | Y                    |
|                                                           | 1.2 Was the allocation sequence concealed until participants were enrolled and assigned to interventions?                                                                           | PY                   |
|                                                           | 1.3 Did baseline differences between intervention groups suggest a problem with the randomization process?                                                                          | PN                   |
|                                                           | <b>Risk of bias judgement</b>                                                                                                                                                       | <b>Low</b>           |
| <b>Bias due to deviations from intended interventions</b> | 2.1. Were participants aware of their assigned intervention during the trial?                                                                                                       | PY                   |
|                                                           | 2.2. Were carers and people delivering the interventions aware of participants' assigned intervention during the trial?                                                             | PY                   |
|                                                           | 2.3. If Y/PY/NI to 2.1 or 2.2: Were there deviations from the intended intervention that arose because of the experimental context?                                                 | PY                   |
|                                                           | 2.4 If Y/PY to 2.3: Were these deviations likely to have affected the outcome?                                                                                                      | PN                   |
|                                                           | 2.5. If Y/PY/NI to 2.4: Were these deviations from intended intervention balanced between groups?                                                                                   | NA                   |
|                                                           | 2.6 Was an appropriate analysis used to estimate the effect of assignment to intervention?                                                                                          | PY                   |
|                                                           | 2.7 If N/PN/NI to 2.6: Was there potential for a substantial impact (on the result) of the failure to analyse participants in the group to which they were randomized?              | NA                   |
| <b>Risk of bias judgement</b>                             | <b>Some concerns</b>                                                                                                                                                                |                      |
| <b>Bias due to missing outcome data</b>                   | 3.1 Were data for this outcome available for all, or nearly all, participants randomized?                                                                                           | PN                   |
|                                                           | 3.2 If N/PN/NI to 3.1: Is there evidence that result was not biased by missing outcome data?                                                                                        | PN                   |
|                                                           | 3.3 If N/PN to 3.2: Could missingness in the outcome depend on its true value?                                                                                                      | PY                   |
|                                                           | 3.4 If Y/PY/NI to 3.3: Is it likely that missingness in the outcome depended on its true value?                                                                                     | PN                   |
|                                                           | <b>Risk of bias judgement</b>                                                                                                                                                       | <b>Some concerns</b> |
| <b>Bias in measurement of the outcome</b>                 | 4.1 Was the method of measuring the outcome inappropriate?                                                                                                                          | PN                   |
|                                                           | 4.2 Could measurement or ascertainment of the outcome have differed between intervention groups?                                                                                    | PN                   |
|                                                           | 4.3 Were outcome assessors aware of the intervention received by study participants?                                                                                                | PY                   |
|                                                           | 4.4 If Y/PY/NI to 4.3: Could assessment of the outcome have been influenced by knowledge of intervention received?                                                                  | NI                   |
|                                                           | 4.5 If Y/PY/NI to 4.4: Is it likely that assessment of the outcome was influenced by knowledge of intervention received?                                                            | NI                   |
|                                                           | <b>Risk of bias judgement</b>                                                                                                                                                       | <b>High</b>          |
| <b>Bias in selection of the reported result</b>           | 5.1 Were the data that produced this result analysed in accordance with a pre-specified analysis plan that was finalized before unblinded outcome data were available for analysis? | PY                   |
|                                                           | 5.2 ... multiple eligible outcome measurements (e.g. scales, definitions, time points) within the outcome domain?                                                                   | NI                   |
|                                                           | 5.3 ... multiple eligible analyses of the data?                                                                                                                                     | NI                   |
|                                                           | <b>Risk of bias judgement</b>                                                                                                                                                       | <b>Some concerns</b> |
| <b>Overall bias</b>                                       | <b>Risk of bias judgement</b>                                                                                                                                                       | <b>High</b>          |

| Study                                                     | Lara-Palomo 2022                                                                                                                                                                    |                      |
|-----------------------------------------------------------|-------------------------------------------------------------------------------------------------------------------------------------------------------------------------------------|----------------------|
| Domain                                                    | Signalling question                                                                                                                                                                 | Response             |
| <b>Bias arising from the randomization process</b>        | 1.1 Was the allocation sequence random?                                                                                                                                             | Y                    |
|                                                           | 1.2 Was the allocation sequence concealed until participants were enrolled and assigned to interventions?                                                                           | PY                   |
|                                                           | 1.3 Did baseline differences between intervention groups suggest a problem with the randomization process?                                                                          | PN                   |
|                                                           | <b>Risk of bias judgement</b>                                                                                                                                                       | <b>Low</b>           |
| <b>Bias due to deviations from intended interventions</b> | 2.1. Were participants aware of their assigned intervention during the trial?                                                                                                       | PY                   |
|                                                           | 2.2. Were carers and people delivering the interventions aware of participants' assigned intervention during the trial?                                                             | PN                   |
|                                                           | 2.3. If Y/PY/NI to 2.1 or 2.2: Were there deviations from the intended intervention that arose because of the experimental context?                                                 | PN                   |
|                                                           | 2.4 If Y/PY to 2.3: Were these deviations likely to have affected the outcome?                                                                                                      | NA                   |
|                                                           | 2.5. If Y/PY/NI to 2.4: Were these deviations from intended intervention balanced between groups?                                                                                   | NA                   |
|                                                           | 2.6 Was an appropriate analysis used to estimate the effect of assignment to intervention?                                                                                          | PY                   |
|                                                           | 2.7 If N/PN/NI to 2.6: Was there potential for a substantial impact (on the result) of the failure to analyse participants in the group to which they were randomized?              | NA                   |
| <b>Risk of bias judgement</b>                             | <b>Low</b>                                                                                                                                                                          |                      |
| <b>Bias due to missing outcome data</b>                   | 3.1 Were data for this outcome available for all, or nearly all, participants randomized?                                                                                           | PN                   |
|                                                           | 3.2 If N/PN/NI to 3.1: Is there evidence that result was not biased by missing outcome data?                                                                                        | PY                   |
|                                                           | 3.3 If N/PN to 3.2: Could missingness in the outcome depend on its true value?                                                                                                      | NA                   |
|                                                           | 3.4 If Y/PY/NI to 3.3: Is it likely that missingness in the outcome depended on its true value?                                                                                     | NA                   |
|                                                           | <b>Risk of bias judgement</b>                                                                                                                                                       | <b>Low</b>           |
| <b>Bias in measurement of the outcome</b>                 | 4.1 Was the method of measuring the outcome inappropriate?                                                                                                                          | PN                   |
|                                                           | 4.2 Could measurement or ascertainment of the outcome have differed between intervention groups?                                                                                    | PN                   |
|                                                           | 4.3 Were outcome assessors aware of the intervention received by study participants?                                                                                                | PN                   |
|                                                           | 4.4 If Y/PY/NI to 4.3: Could assessment of the outcome have been influenced by knowledge of intervention received?                                                                  | NA                   |
|                                                           | 4.5 If Y/PY/NI to 4.4: Is it likely that assessment of the outcome was influenced by knowledge of intervention received?                                                            | NA                   |
|                                                           | <b>Risk of bias judgement</b>                                                                                                                                                       | <b>Low</b>           |
| <b>Bias in selection of the reported result</b>           | 5.1 Were the data that produced this result analysed in accordance with a pre-specified analysis plan that was finalized before unblinded outcome data were available for analysis? | PY                   |
|                                                           | 5.2 ... multiple eligible outcome measurements (e.g. scales, definitions, time points) within the outcome domain?                                                                   | NI                   |
|                                                           | 5.3 ... multiple eligible analyses of the data?                                                                                                                                     | NI                   |
|                                                           | <b>Risk of bias judgement</b>                                                                                                                                                       | <b>Some concerns</b> |
| <b>Overall bias</b>                                       | <b>Risk of bias judgement</b>                                                                                                                                                       | <b>Some concerns</b> |

| Study                                              | Kızıltaş 2022                                                                                                                                                                       |                      |
|----------------------------------------------------|-------------------------------------------------------------------------------------------------------------------------------------------------------------------------------------|----------------------|
| Domain                                             | Signalling question                                                                                                                                                                 | Response             |
| Bias arising from the randomization process        | 1.1 Was the allocation sequence random?                                                                                                                                             | Y                    |
|                                                    | 1.2 Was the allocation sequence concealed until participants were enrolled and assigned to interventions?                                                                           | PY                   |
|                                                    | 1.3 Did baseline differences between intervention groups suggest a problem with the randomization process?                                                                          | PN                   |
|                                                    | <b>Risk of bias judgement</b>                                                                                                                                                       | <b>Low</b>           |
| Bias due to deviations from intended interventions | 2.1. Were participants aware of their assigned intervention during the trial?                                                                                                       | PY                   |
|                                                    | 2.2. Were carers and people delivering the interventions aware of participants' assigned intervention during the trial?                                                             | PY                   |
|                                                    | 2.3. If Y/PY/NI to 2.1 or 2.2: Were there deviations from the intended intervention that arose because of the experimental context?                                                 | PY                   |
|                                                    | 2.4 If Y/PY to 2.3: Were these deviations likely to have affected the outcome?                                                                                                      | PY                   |
|                                                    | 2.5. If Y/PY/NI to 2.4: Were these deviations from intended intervention balanced between groups?                                                                                   | PY                   |
|                                                    | 2.6 Was an appropriate analysis used to estimate the effect of assignment to intervention?                                                                                          | PN                   |
|                                                    | 2.7 If N/PN/NI to 2.6: Was there potential for a substantial impact (on the result) of the failure to analyse participants in the group to which they were randomized?              | PN                   |
|                                                    | <b>Risk of bias judgement</b>                                                                                                                                                       | <b>Some concerns</b> |
| Bias due to missing outcome data                   | 3.1 Were data for this outcome available for all, or nearly all, participants randomized?                                                                                           | PN                   |
|                                                    | 3.2 If N/PN/NI to 3.1: Is there evidence that result was not biased by missing outcome data?                                                                                        | PN                   |
|                                                    | 3.3 If N/PN to 3.2: Could missingness in the outcome depend on its true value?                                                                                                      | PY                   |
|                                                    | 3.4 If Y/PY/NI to 3.3: Is it likely that missingness in the outcome depended on its true value?                                                                                     | PY                   |
|                                                    | <b>Risk of bias judgement</b>                                                                                                                                                       | <b>High</b>          |
| Bias in measurement of the outcome                 | 4.1 Was the method of measuring the outcome inappropriate?                                                                                                                          | PN                   |
|                                                    | 4.2 Could measurement or ascertainment of the outcome have differed between intervention groups?                                                                                    | PN                   |
|                                                    | 4.3 Were outcome assessors aware of the intervention received by study participants?                                                                                                | PY                   |
|                                                    | 4.4 If Y/PY/NI to 4.3: Could assessment of the outcome have been influenced by knowledge of intervention received?                                                                  | NI                   |
|                                                    | 4.5 If Y/PY/NI to 4.4: Is it likely that assessment of the outcome was influenced by knowledge of intervention received?                                                            | NI                   |
|                                                    | <b>Risk of bias judgement</b>                                                                                                                                                       | <b>High</b>          |
| Bias in selection of the reported result           | 5.1 Were the data that produced this result analysed in accordance with a pre-specified analysis plan that was finalized before unblinded outcome data were available for analysis? | PY                   |
|                                                    | 5.2 ... multiple eligible outcome measurements (e.g. scales, definitions, time points) within the outcome domain?                                                                   | NI                   |
|                                                    | 5.3 ... multiple eligible analyses of the data?                                                                                                                                     | NI                   |
|                                                    | <b>Risk of bias judgement</b>                                                                                                                                                       | <b>Some concerns</b> |
| Overall bias                                       | <b>Risk of bias judgement</b>                                                                                                                                                       | <b>High</b>          |

| Study                                                     | Hrkać 2022                                                                                                                                                                          |            |
|-----------------------------------------------------------|-------------------------------------------------------------------------------------------------------------------------------------------------------------------------------------|------------|
| Domain                                                    | Signalling question                                                                                                                                                                 | Response   |
| <b>Bias arising from the randomization process</b>        | 1.1 Was the allocation sequence random?                                                                                                                                             | Y          |
|                                                           | 1.2 Was the allocation sequence concealed until participants were enrolled and assigned to interventions?                                                                           | PY         |
|                                                           | 1.3 Did baseline differences between intervention groups suggest a problem with the randomization process?                                                                          | PN         |
|                                                           | <b>Risk of bias judgement</b>                                                                                                                                                       | <b>Low</b> |
| <b>Bias due to deviations from intended interventions</b> | 2.1. Were participants aware of their assigned intervention during the trial?                                                                                                       | PY         |
|                                                           | 2.2. Were carers and people delivering the interventions aware of participants' assigned intervention during the trial?                                                             | PY         |
|                                                           | 2.3. If Y/PY/NI to 2.1 or 2.2: Were there deviations from the intended intervention that arose because of the experimental context?                                                 | PN         |
|                                                           | 2.4 If Y/PY to 2.3: Were these deviations likely to have affected the outcome?                                                                                                      | NA         |
|                                                           | 2.5. If Y/PY/NI to 2.4: Were these deviations from intended intervention balanced between groups?                                                                                   | NA         |
|                                                           | 2.6 Was an appropriate analysis used to estimate the effect of assignment to intervention?                                                                                          | PY         |
|                                                           | 2.7 If N/PN/NI to 2.6: Was there potential for a substantial impact (on the result) of the failure to analyse participants in the group to which they were randomized?              | NA         |
| <b>Risk of bias judgement</b>                             | <b>Low</b>                                                                                                                                                                          |            |
| <b>Bias due to missing outcome data</b>                   | 3.1 Were data for this outcome available for all, or nearly all, participants randomized?                                                                                           | PN         |
|                                                           | 3.2 If N/PN/NI to 3.1: Is there evidence that result was not biased by missing outcome data?                                                                                        | PY         |
|                                                           | 3.3 If N/PN to 3.2: Could missingness in the outcome depend on its true value?                                                                                                      | NA         |
|                                                           | 3.4 If Y/PY/NI to 3.3: Is it likely that missingness in the outcome depended on its true value?                                                                                     | NA         |
|                                                           | <b>Risk of bias judgement</b>                                                                                                                                                       | <b>Low</b> |
| <b>Bias in measurement of the outcome</b>                 | 4.1 Was the method of measuring the outcome inappropriate?                                                                                                                          | PN         |
|                                                           | 4.2 Could measurement or ascertainment of the outcome have differed between intervention groups?                                                                                    | PN         |
|                                                           | 4.3 Were outcome assessors aware of the intervention received by study participants?                                                                                                | PN         |
|                                                           | 4.4 If Y/PY/NI to 4.3: Could assessment of the outcome have been influenced by knowledge of intervention received?                                                                  | NA         |
|                                                           | 4.5 If Y/PY/NI to 4.4: Is it likely that assessment of the outcome was influenced by knowledge of intervention received?                                                            | NA         |
|                                                           | <b>Risk of bias judgement</b>                                                                                                                                                       | <b>Low</b> |
| <b>Bias in selection of the reported result</b>           | 5.1 Were the data that produced this result analysed in accordance with a pre-specified analysis plan that was finalized before unblinded outcome data were available for analysis? | PY         |
|                                                           | 5.2 ... multiple eligible outcome measurements (e.g. scales, definitions, time points) within the outcome domain?                                                                   | PN         |
|                                                           | 5.3 ... multiple eligible analyses of the data?                                                                                                                                     | PN         |
|                                                           | <b>Risk of bias judgement</b>                                                                                                                                                       | <b>Low</b> |
| <b>Overall bias</b>                                       | <b>Risk of bias judgement</b>                                                                                                                                                       | <b>Low</b> |

| Study                                              | Diez 2022                                                                                                                                                                           |                      |
|----------------------------------------------------|-------------------------------------------------------------------------------------------------------------------------------------------------------------------------------------|----------------------|
| Domain                                             | Signalling question                                                                                                                                                                 | Response             |
| Bias arising from the randomization process        | 1.1 Was the allocation sequence random?                                                                                                                                             | Y                    |
|                                                    | 1.2 Was the allocation sequence concealed until participants were enrolled and assigned to interventions?                                                                           | PY                   |
|                                                    | 1.3 Did baseline differences between intervention groups suggest a problem with the randomization process?                                                                          | PN                   |
|                                                    | <b>Risk of bias judgement</b>                                                                                                                                                       | <b>Low</b>           |
| Bias due to deviations from intended interventions | 2.1. Were participants aware of their assigned intervention during the trial?                                                                                                       | PY                   |
|                                                    | 2.2. Were carers and people delivering the interventions aware of participants' assigned intervention during the trial?                                                             | PY                   |
|                                                    | 2.3. If Y/PY/NI to 2.1 or 2.2: Were there deviations from the intended intervention that arose because of the experimental context?                                                 | NI                   |
|                                                    | 2.4 If Y/PY to 2.3: Were these deviations likely to have affected the outcome?                                                                                                      | NA                   |
|                                                    | 2.5. If Y/PY/NI to 2.4: Were these deviations from intended intervention balanced between groups?                                                                                   | NA                   |
|                                                    | 2.6 Was an appropriate analysis used to estimate the effect of assignment to intervention?                                                                                          | PY                   |
|                                                    | 2.7 If N/PN/NI to 2.6: Was there potential for a substantial impact (on the result) of the failure to analyse participants in the group to which they were randomized?              | NA                   |
|                                                    | <b>Risk of bias judgement</b>                                                                                                                                                       | <b>Some concerns</b> |
| Bias due to missing outcome data                   | 3.1 Were data for this outcome available for all, or nearly all, participants randomized?                                                                                           | PY                   |
|                                                    | 3.2 If N/PN/NI to 3.1: Is there evidence that result was not biased by missing outcome data?                                                                                        | NA                   |
|                                                    | 3.3 If N/PN to 3.2: Could missingness in the outcome depend on its true value?                                                                                                      | NA                   |
|                                                    | 3.4 If Y/PY/NI to 3.3: Is it likely that missingness in the outcome depended on its true value?                                                                                     | NA                   |
|                                                    | <b>Risk of bias judgement</b>                                                                                                                                                       | <b>Low</b>           |
| Bias in measurement of the outcome                 | 4.1 Was the method of measuring the outcome inappropriate?                                                                                                                          | PN                   |
|                                                    | 4.2 Could measurement or ascertainment of the outcome have differed between intervention groups?                                                                                    | PN                   |
|                                                    | 4.3 Were outcome assessors aware of the intervention received by study participants?                                                                                                | PN                   |
|                                                    | 4.4 If Y/PY/NI to 4.3: Could assessment of the outcome have been influenced by knowledge of intervention received?                                                                  | NA                   |
|                                                    | 4.5 If Y/PY/NI to 4.4: Is it likely that assessment of the outcome was influenced by knowledge of intervention received?                                                            | NA                   |
|                                                    | <b>Risk of bias judgement</b>                                                                                                                                                       | <b>Low</b>           |
| Bias in selection of the reported result           | 5.1 Were the data that produced this result analysed in accordance with a pre-specified analysis plan that was finalized before unblinded outcome data were available for analysis? | PY                   |
|                                                    | 5.2 ... multiple eligible outcome measurements (e.g. scales, definitions, time points) within the outcome domain?                                                                   | PN                   |
|                                                    | 5.3 ... multiple eligible analyses of the data?                                                                                                                                     | PN                   |
|                                                    | <b>Risk of bias judgement</b>                                                                                                                                                       | <b>Low</b>           |
| Overall bias                                       | <b>Risk of bias judgement</b>                                                                                                                                                       | <b>Some concerns</b> |

| Study                                                     | Aguilar-Ferrándiz 2022                                                                                                                                                              |                      |
|-----------------------------------------------------------|-------------------------------------------------------------------------------------------------------------------------------------------------------------------------------------|----------------------|
| Domain                                                    | Signalling question                                                                                                                                                                 | Response             |
| <b>Bias arising from the randomization process</b>        | 1.1 Was the allocation sequence random?                                                                                                                                             | Y                    |
|                                                           | 1.2 Was the allocation sequence concealed until participants were enrolled and assigned to interventions?                                                                           | PY                   |
|                                                           | 1.3 Did baseline differences between intervention groups suggest a problem with the randomization process?                                                                          | PN                   |
|                                                           | <b>Risk of bias judgement</b>                                                                                                                                                       | <b>Low</b>           |
| <b>Bias due to deviations from intended interventions</b> | 2.1. Were participants aware of their assigned intervention during the trial?                                                                                                       | PY                   |
|                                                           | 2.2. Were carers and people delivering the interventions aware of participants' assigned intervention during the trial?                                                             | PN                   |
|                                                           | 2.3. If Y/PY/NI to 2.1 or 2.2: Were there deviations from the intended intervention that arose because of the experimental context?                                                 | PN                   |
|                                                           | 2.4 If Y/PY to 2.3: Were these deviations likely to have affected the outcome?                                                                                                      | NA                   |
|                                                           | 2.5. If Y/PY/NI to 2.4: Were these deviations from intended intervention balanced between groups?                                                                                   | NA                   |
|                                                           | 2.6 Was an appropriate analysis used to estimate the effect of assignment to intervention?                                                                                          | PY                   |
|                                                           | 2.7 If N/PN/NI to 2.6: Was there potential for a substantial impact (on the result) of the failure to analyse participants in the group to which they were randomized?              | NA                   |
| <b>Risk of bias judgement</b>                             | <b>Low</b>                                                                                                                                                                          |                      |
| <b>Bias due to missing outcome data</b>                   | 3.1 Were data for this outcome available for all, or nearly all, participants randomized?                                                                                           | Y                    |
|                                                           | 3.2 If N/PN/NI to 3.1: Is there evidence that result was not biased by missing outcome data?                                                                                        | NA                   |
|                                                           | 3.3 If N/PN to 3.2: Could missingness in the outcome depend on its true value?                                                                                                      | NA                   |
|                                                           | 3.4 If Y/PY/NI to 3.3: Is it likely that missingness in the outcome depended on its true value?                                                                                     | NA                   |
|                                                           | <b>Risk of bias judgement</b>                                                                                                                                                       | <b>Low</b>           |
| <b>Bias in measurement of the outcome</b>                 | 4.1 Was the method of measuring the outcome inappropriate?                                                                                                                          | PN                   |
|                                                           | 4.2 Could measurement or ascertainment of the outcome have differed between intervention groups?                                                                                    | PN                   |
|                                                           | 4.3 Were outcome assessors aware of the intervention received by study participants?                                                                                                | PN                   |
|                                                           | 4.4 If Y/PY/NI to 4.3: Could assessment of the outcome have been influenced by knowledge of intervention received?                                                                  | NA                   |
|                                                           | 4.5 If Y/PY/NI to 4.4: Is it likely that assessment of the outcome was influenced by knowledge of intervention received?                                                            | NA                   |
|                                                           | <b>Risk of bias judgement</b>                                                                                                                                                       | <b>Low</b>           |
| <b>Bias in selection of the reported result</b>           | 5.1 Were the data that produced this result analysed in accordance with a pre-specified analysis plan that was finalized before unblinded outcome data were available for analysis? | PY                   |
|                                                           | 5.2 ... multiple eligible outcome measurements (e.g. scales, definitions, time points) within the outcome domain?                                                                   | NI                   |
|                                                           | 5.3 ... multiple eligible analyses of the data?                                                                                                                                     | NI                   |
|                                                           | <b>Risk of bias judgement</b>                                                                                                                                                       | <b>Some concerns</b> |
| <b>Overall bias</b>                                       | <b>Risk of bias judgement</b>                                                                                                                                                       | <b>Some concerns</b> |

| Study                                                     | Yakşi 2021                                                                                                                                                                          |                      |
|-----------------------------------------------------------|-------------------------------------------------------------------------------------------------------------------------------------------------------------------------------------|----------------------|
| Domain                                                    | Signalling question                                                                                                                                                                 | Response             |
| <b>Bias arising from the randomization process</b>        | 1.1 Was the allocation sequence random?                                                                                                                                             | Y                    |
|                                                           | 1.2 Was the allocation sequence concealed until participants were enrolled and assigned to interventions?                                                                           | Y                    |
|                                                           | 1.3 Did baseline differences between intervention groups suggest a problem with the randomization process?                                                                          | PN                   |
|                                                           | <b>Risk of bias judgement</b>                                                                                                                                                       | <b>Low</b>           |
| <b>Bias due to deviations from intended interventions</b> | 2.1. Were participants aware of their assigned intervention during the trial?                                                                                                       | N                    |
|                                                           | 2.2. Were carers and people delivering the interventions aware of participants' assigned intervention during the trial?                                                             | PY                   |
|                                                           | 2.3. If Y/PY/NI to 2.1 or 2.2: Were there deviations from the intended intervention that arose because of the experimental context?                                                 | PN                   |
|                                                           | 2.4 If Y/PY to 2.3: Were these deviations likely to have affected the outcome?                                                                                                      | NA                   |
|                                                           | 2.5. If Y/PY/NI to 2.4: Were these deviations from intended intervention balanced between groups?                                                                                   | NA                   |
|                                                           | 2.6 Was an appropriate analysis used to estimate the effect of assignment to intervention?                                                                                          | PY                   |
|                                                           | 2.7 If N/PN/NI to 2.6: Was there potential for a substantial impact (on the result) of the failure to analyse participants in the group to which they were randomized?              | NA                   |
|                                                           | <b>Risk of bias judgement</b>                                                                                                                                                       | <b>Low</b>           |
| <b>Bias due to missing outcome data</b>                   | 3.1 Were data for this outcome available for all, or nearly all, participants randomized?                                                                                           | PY                   |
|                                                           | 3.2 If N/PN/NI to 3.1: Is there evidence that result was not biased by missing outcome data?                                                                                        | NA                   |
|                                                           | 3.3 If N/PN to 3.2: Could missingness in the outcome depend on its true value?                                                                                                      | NA                   |
|                                                           | 3.4 If Y/PY/NI to 3.3: Is it likely that missingness in the outcome depended on its true value?                                                                                     | NA                   |
|                                                           | <b>Risk of bias judgement</b>                                                                                                                                                       | <b>Low</b>           |
| <b>Bias in measurement of the outcome</b>                 | 4.1 Was the method of measuring the outcome inappropriate?                                                                                                                          | PN                   |
|                                                           | 4.2 Could measurement or ascertainment of the outcome have differed between intervention groups?                                                                                    | PN                   |
|                                                           | 4.3 Were outcome assessors aware of the intervention received by study participants?                                                                                                | PY                   |
|                                                           | 4.4 If Y/PY/NI to 4.3: Could assessment of the outcome have been influenced by knowledge of intervention received?                                                                  | NI                   |
|                                                           | 4.5 If Y/PY/NI to 4.4: Is it likely that assessment of the outcome was influenced by knowledge of intervention received?                                                            | NI                   |
|                                                           | <b>Risk of bias judgement</b>                                                                                                                                                       | <b>High</b>          |
| <b>Bias in selection of the reported result</b>           | 5.1 Were the data that produced this result analysed in accordance with a pre-specified analysis plan that was finalized before unblinded outcome data were available for analysis? | PY                   |
|                                                           | 5.2 ... multiple eligible outcome measurements (e.g. scales, definitions, time points) within the outcome domain?                                                                   | NI                   |
|                                                           | 5.3 ... multiple eligible analyses of the data?                                                                                                                                     | NI                   |
|                                                           | <b>Risk of bias judgement</b>                                                                                                                                                       | <b>Some concerns</b> |
| <b>Overall bias</b>                                       | <b>Risk of bias judgement</b>                                                                                                                                                       | <b>High</b>          |



| Study                                                     | Schmidt 2021                                                                                                                                                                        |             |
|-----------------------------------------------------------|-------------------------------------------------------------------------------------------------------------------------------------------------------------------------------------|-------------|
| Domain                                                    | Signalling question                                                                                                                                                                 | Response    |
| <b>Bias arising from the randomization process</b>        | 1.1 Was the allocation sequence random?                                                                                                                                             | Y           |
|                                                           | 1.2 Was the allocation sequence concealed until participants were enrolled and assigned to interventions?                                                                           | PN          |
|                                                           | 1.3 Did baseline differences between intervention groups suggest a problem with the randomization process?                                                                          | PN          |
|                                                           | <b>Risk of bias judgement</b>                                                                                                                                                       | <b>High</b> |
| <b>Bias due to deviations from intended interventions</b> | 2.1. Were participants aware of their assigned intervention during the trial?                                                                                                       | PY          |
|                                                           | 2.2. Were carers and people delivering the interventions aware of participants' assigned intervention during the trial?                                                             | PY          |
|                                                           | 2.3. If Y/PY/NI to 2.1 or 2.2: Were there deviations from the intended intervention that arose because of the experimental context?                                                 | PY          |
|                                                           | 2.4 If Y/PY to 2.3: Were these deviations likely to have affected the outcome?                                                                                                      | PN          |
|                                                           | 2.5. If Y/PY/NI to 2.4: Were these deviations from intended intervention balanced between groups?                                                                                   | NA          |
|                                                           | 2.6 Was an appropriate analysis used to estimate the effect of assignment to intervention?                                                                                          | PY          |
|                                                           | 2.7 If N/PN/NI to 2.6: Was there potential for a substantial impact (on the result) of the failure to analyse participants in the group to which they were randomized?              | NA          |
| <b>Risk of bias judgement</b>                             | <b>Some concerns</b>                                                                                                                                                                |             |
| <b>Bias due to missing outcome data</b>                   | 3.1 Were data for this outcome available for all, or nearly all, participants randomized?                                                                                           | PN          |
|                                                           | 3.2 If N/PN/NI to 3.1: Is there evidence that result was not biased by missing outcome data?                                                                                        | PN          |
|                                                           | 3.3 If N/PN to 3.2: Could missingness in the outcome depend on its true value?                                                                                                      | PY          |
|                                                           | 3.4 If Y/PY/NI to 3.3: Is it likely that missingness in the outcome depended on its true value?                                                                                     | NI          |
|                                                           | <b>Risk of bias judgement</b>                                                                                                                                                       | <b>High</b> |
| <b>Bias in measurement of the outcome</b>                 | 4.1 Was the method of measuring the outcome inappropriate?                                                                                                                          | PN          |
|                                                           | 4.2 Could measurement or ascertainment of the outcome have differed between intervention groups?                                                                                    | PN          |
|                                                           | 4.3 Were outcome assessors aware of the intervention received by study participants?                                                                                                | PY          |
|                                                           | 4.4 If Y/PY/NI to 4.3: Could assessment of the outcome have been influenced by knowledge of intervention received?                                                                  | PN          |
|                                                           | 4.5 If Y/PY/NI to 4.4: Is it likely that assessment of the outcome was influenced by knowledge of intervention received?                                                            | NA          |
|                                                           | <b>Risk of bias judgement</b>                                                                                                                                                       | <b>Low</b>  |
| <b>Bias in selection of the reported result</b>           | 5.1 Were the data that produced this result analysed in accordance with a pre-specified analysis plan that was finalized before unblinded outcome data were available for analysis? | PY          |
|                                                           | 5.2 ... multiple eligible outcome measurements (e.g. scales, definitions, time points) within the outcome domain?                                                                   | PN          |
|                                                           | 5.3 ... multiple eligible analyses of the data?                                                                                                                                     | PN          |
|                                                           | <b>Risk of bias judgement</b>                                                                                                                                                       | <b>Low</b>  |
| <b>Overall bias</b>                                       | <b>Risk of bias judgement</b>                                                                                                                                                       | <b>High</b> |

| Study                                                     | Polaski 2021                                                                                                                                                                        |                      |
|-----------------------------------------------------------|-------------------------------------------------------------------------------------------------------------------------------------------------------------------------------------|----------------------|
| Domain                                                    | Signalling question                                                                                                                                                                 | Response             |
| <b>Bias arising from the randomization process</b>        | 1.1 Was the allocation sequence random?                                                                                                                                             | Y                    |
|                                                           | 1.2 Was the allocation sequence concealed until participants were enrolled and assigned to interventions?                                                                           | PY                   |
|                                                           | 1.3 Did baseline differences between intervention groups suggest a problem with the randomization process?                                                                          | PN                   |
|                                                           | <b>Risk of bias judgement</b>                                                                                                                                                       | <b>Low</b>           |
| <b>Bias due to deviations from intended interventions</b> | 2.1. Were participants aware of their assigned intervention during the trial?                                                                                                       | PY                   |
|                                                           | 2.2. Were carers and people delivering the interventions aware of participants' assigned intervention during the trial?                                                             | PN                   |
|                                                           | 2.3. If Y/PY/NI to 2.1 or 2.2: Were there deviations from the intended intervention that arose because of the experimental context?                                                 | PN                   |
|                                                           | 2.4 If Y/PY to 2.3: Were these deviations likely to have affected the outcome?                                                                                                      | NA                   |
|                                                           | 2.5. If Y/PY/NI to 2.4: Were these deviations from intended intervention balanced between groups?                                                                                   | NA                   |
|                                                           | 2.6 Was an appropriate analysis used to estimate the effect of assignment to intervention?                                                                                          | PY                   |
|                                                           | 2.7 If N/PN/NI to 2.6: Was there potential for a substantial impact (on the result) of the failure to analyse participants in the group to which they were randomized?              | NA                   |
| <b>Risk of bias judgement</b>                             | <b>Low</b>                                                                                                                                                                          |                      |
| <b>Bias due to missing outcome data</b>                   | 3.1 Were data for this outcome available for all, or nearly all, participants randomized?                                                                                           | PN                   |
|                                                           | 3.2 If N/PN/NI to 3.1: Is there evidence that result was not biased by missing outcome data?                                                                                        | PY                   |
|                                                           | 3.3 If N/PN to 3.2: Could missingness in the outcome depend on its true value?                                                                                                      | NA                   |
|                                                           | 3.4 If Y/PY/NI to 3.3: Is it likely that missingness in the outcome depended on its true value?                                                                                     | NA                   |
|                                                           | <b>Risk of bias judgement</b>                                                                                                                                                       | <b>Low</b>           |
| <b>Bias in measurement of the outcome</b>                 | 4.1 Was the method of measuring the outcome inappropriate?                                                                                                                          | PN                   |
|                                                           | 4.2 Could measurement or ascertainment of the outcome have differed between intervention groups?                                                                                    | PN                   |
|                                                           | 4.3 Were outcome assessors aware of the intervention received by study participants?                                                                                                | PY                   |
|                                                           | 4.4 If Y/PY/NI to 4.3: Could assessment of the outcome have been influenced by knowledge of intervention received?                                                                  | PY                   |
|                                                           | 4.5 If Y/PY/NI to 4.4: Is it likely that assessment of the outcome was influenced by knowledge of intervention received?                                                            | PN                   |
|                                                           | <b>Risk of bias judgement</b>                                                                                                                                                       | <b>Some concerns</b> |
| <b>Bias in selection of the reported result</b>           | 5.1 Were the data that produced this result analysed in accordance with a pre-specified analysis plan that was finalized before unblinded outcome data were available for analysis? | PY                   |
|                                                           | 5.2 ... multiple eligible outcome measurements (e.g. scales, definitions, time points) within the outcome domain?                                                                   | NI                   |
|                                                           | 5.3 ... multiple eligible analyses of the data?                                                                                                                                     | NI                   |
|                                                           | <b>Risk of bias judgement</b>                                                                                                                                                       | <b>Some concerns</b> |
| <b>Overall bias</b>                                       | <b>Risk of bias judgement</b>                                                                                                                                                       | <b>Some concerns</b> |

| Study                                                     | Karaarslan 2021                                                                                                                                                                     |                      |
|-----------------------------------------------------------|-------------------------------------------------------------------------------------------------------------------------------------------------------------------------------------|----------------------|
| Domain                                                    | Signalling question                                                                                                                                                                 | Response             |
| <b>Bias arising from the randomization process</b>        | 1.1 Was the allocation sequence random?                                                                                                                                             | Y                    |
|                                                           | 1.2 Was the allocation sequence concealed until participants were enrolled and assigned to interventions?                                                                           | PY                   |
|                                                           | 1.3 Did baseline differences between intervention groups suggest a problem with the randomization process?                                                                          | PN                   |
|                                                           | <b>Risk of bias judgement</b>                                                                                                                                                       | <b>Low</b>           |
| <b>Bias due to deviations from intended interventions</b> | 2.1. Were participants aware of their assigned intervention during the trial?                                                                                                       | PY                   |
|                                                           | 2.2. Were carers and people delivering the interventions aware of participants' assigned intervention during the trial?                                                             | PY                   |
|                                                           | 2.3. If Y/PY/NI to 2.1 or 2.2: Were there deviations from the intended intervention that arose because of the experimental context?                                                 | PN                   |
|                                                           | 2.4 If Y/PY to 2.3: Were these deviations likely to have affected the outcome?                                                                                                      | NA                   |
|                                                           | 2.5. If Y/PY/NI to 2.4: Were these deviations from intended intervention balanced between groups?                                                                                   | NA                   |
|                                                           | 2.6 Was an appropriate analysis used to estimate the effect of assignment to intervention?                                                                                          | PY                   |
|                                                           | 2.7 If N/PN/NI to 2.6: Was there potential for a substantial impact (on the result) of the failure to analyse participants in the group to which they were randomized?              | NA                   |
| <b>Risk of bias judgement</b>                             | <b>Low</b>                                                                                                                                                                          |                      |
| <b>Bias due to missing outcome data</b>                   | 3.1 Were data for this outcome available for all, or nearly all, participants randomized?                                                                                           | PN                   |
|                                                           | 3.2 If N/PN/NI to 3.1: Is there evidence that result was not biased by missing outcome data?                                                                                        | PN                   |
|                                                           | 3.3 If N/PN to 3.2: Could missingness in the outcome depend on its true value?                                                                                                      | PY                   |
|                                                           | 3.4 If Y/PY/NI to 3.3: Is it likely that missingness in the outcome depended on its true value?                                                                                     | PN                   |
|                                                           | <b>Risk of bias judgement</b>                                                                                                                                                       | <b>Some concerns</b> |
| <b>Bias in measurement of the outcome</b>                 | 4.1 Was the method of measuring the outcome inappropriate?                                                                                                                          | PN                   |
|                                                           | 4.2 Could measurement or ascertainment of the outcome have differed between intervention groups?                                                                                    | PN                   |
|                                                           | 4.3 Were outcome assessors aware of the intervention received by study participants?                                                                                                | N                    |
|                                                           | 4.4 If Y/PY/NI to 4.3: Could assessment of the outcome have been influenced by knowledge of intervention received?                                                                  | NA                   |
|                                                           | 4.5 If Y/PY/NI to 4.4: Is it likely that assessment of the outcome was influenced by knowledge of intervention received?                                                            | NA                   |
|                                                           | <b>Risk of bias judgement</b>                                                                                                                                                       | <b>Low</b>           |
| <b>Bias in selection of the reported result</b>           | 5.1 Were the data that produced this result analysed in accordance with a pre-specified analysis plan that was finalized before unblinded outcome data were available for analysis? | PY                   |
|                                                           | 5.2 ... multiple eligible outcome measurements (e.g. scales, definitions, time points) within the outcome domain?                                                                   | NI                   |
|                                                           | 5.3 ... multiple eligible analyses of the data?                                                                                                                                     | NI                   |
|                                                           | <b>Risk of bias judgement</b>                                                                                                                                                       | <b>Some concerns</b> |
| <b>Overall bias</b>                                       | <b>Risk of bias judgement</b>                                                                                                                                                       | <b>Some concerns</b> |

| Study                                                     | Darnall 2021                                                                                                                                                                        |            |
|-----------------------------------------------------------|-------------------------------------------------------------------------------------------------------------------------------------------------------------------------------------|------------|
| Domain                                                    | Signalling question                                                                                                                                                                 | Response   |
| <b>Bias arising from the randomization process</b>        | 1.1 Was the allocation sequence random?                                                                                                                                             | Y          |
|                                                           | 1.2 Was the allocation sequence concealed until participants were enrolled and assigned to interventions?                                                                           | PY         |
|                                                           | 1.3 Did baseline differences between intervention groups suggest a problem with the randomization process?                                                                          | PN         |
|                                                           | <b>Risk of bias judgement</b>                                                                                                                                                       | <b>Low</b> |
| <b>Bias due to deviations from intended interventions</b> | 2.1. Were participants aware of their assigned intervention during the trial?                                                                                                       | PY         |
|                                                           | 2.2. Were carers and people delivering the interventions aware of participants' assigned intervention during the trial?                                                             | PN         |
|                                                           | 2.3. If Y/PY/NI to 2.1 or 2.2: Were there deviations from the intended intervention that arose because of the experimental context?                                                 | PN         |
|                                                           | 2.4 If Y/PY to 2.3: Were these deviations likely to have affected the outcome?                                                                                                      | NA         |
|                                                           | 2.5. If Y/PY/NI to 2.4: Were these deviations from intended intervention balanced between groups?                                                                                   | NA         |
|                                                           | 2.6 Was an appropriate analysis used to estimate the effect of assignment to intervention?                                                                                          | PY         |
|                                                           | 2.7 If N/PN/NI to 2.6: Was there potential for a substantial impact (on the result) of the failure to analyse participants in the group to which they were randomized?              | NA         |
| <b>Risk of bias judgement</b>                             | <b>Low</b>                                                                                                                                                                          |            |
| <b>Bias due to missing outcome data</b>                   | 3.1 Were data for this outcome available for all, or nearly all, participants randomized?                                                                                           | PN         |
|                                                           | 3.2 If N/PN/NI to 3.1: Is there evidence that result was not biased by missing outcome data?                                                                                        | PY         |
|                                                           | 3.3 If N/PN to 3.2: Could missingness in the outcome depend on its true value?                                                                                                      | NA         |
|                                                           | 3.4 If Y/PY/NI to 3.3: Is it likely that missingness in the outcome depended on its true value?                                                                                     | NA         |
|                                                           | <b>Risk of bias judgement</b>                                                                                                                                                       | <b>Low</b> |
| <b>Bias in measurement of the outcome</b>                 | 4.1 Was the method of measuring the outcome inappropriate?                                                                                                                          | PN         |
|                                                           | 4.2 Could measurement or ascertainment of the outcome have differed between intervention groups?                                                                                    | PN         |
|                                                           | 4.3 Were outcome assessors aware of the intervention received by study participants?                                                                                                | PN         |
|                                                           | 4.4 If Y/PY/NI to 4.3: Could assessment of the outcome have been influenced by knowledge of intervention received?                                                                  | NA         |
|                                                           | 4.5 If Y/PY/NI to 4.4: Is it likely that assessment of the outcome was influenced by knowledge of intervention received?                                                            | NA         |
|                                                           | <b>Risk of bias judgement</b>                                                                                                                                                       | <b>Low</b> |
| <b>Bias in selection of the reported result</b>           | 5.1 Were the data that produced this result analysed in accordance with a pre-specified analysis plan that was finalized before unblinded outcome data were available for analysis? | PY         |
|                                                           | 5.2 ... multiple eligible outcome measurements (e.g. scales, definitions, time points) within the outcome domain?                                                                   | PN         |
|                                                           | 5.3 ... multiple eligible analyses of the data?                                                                                                                                     | PN         |
|                                                           | <b>Risk of bias judgement</b>                                                                                                                                                       | <b>Low</b> |
| <b>Overall bias</b>                                       | <b>Risk of bias judgement</b>                                                                                                                                                       | <b>Low</b> |

| Study                                                     | Batibay 2021                                                                                                                                                                        |                      |
|-----------------------------------------------------------|-------------------------------------------------------------------------------------------------------------------------------------------------------------------------------------|----------------------|
| Domain                                                    | Signalling question                                                                                                                                                                 | Response             |
| <b>Bias arising from the randomization process</b>        | 1.1 Was the allocation sequence random?                                                                                                                                             | Y                    |
|                                                           | 1.2 Was the allocation sequence concealed until participants were enrolled and assigned to interventions?                                                                           | PY                   |
|                                                           | 1.3 Did baseline differences between intervention groups suggest a problem with the randomization process?                                                                          | PN                   |
|                                                           | <b>Risk of bias judgement</b>                                                                                                                                                       | <b>Low</b>           |
| <b>Bias due to deviations from intended interventions</b> | 2.1. Were participants aware of their assigned intervention during the trial?                                                                                                       | PY                   |
|                                                           | 2.2. Were carers and people delivering the interventions aware of participants' assigned intervention during the trial?                                                             | PY                   |
|                                                           | 2.3. If Y/PY/NI to 2.1 or 2.2: Were there deviations from the intended intervention that arose because of the experimental context?                                                 | PN                   |
|                                                           | 2.4 If Y/PY to 2.3: Were these deviations likely to have affected the outcome?                                                                                                      | NA                   |
|                                                           | 2.5. If Y/PY/NI to 2.4: Were these deviations from intended intervention balanced between groups?                                                                                   | NA                   |
|                                                           | 2.6 Was an appropriate analysis used to estimate the effect of assignment to intervention?                                                                                          | PY                   |
|                                                           | 2.7 If N/PN/NI to 2.6: Was there potential for a substantial impact (on the result) of the failure to analyse participants in the group to which they were randomized?              | NA                   |
| <b>Risk of bias judgement</b>                             | <b>Low</b>                                                                                                                                                                          |                      |
| <b>Bias due to missing outcome data</b>                   | 3.1 Were data for this outcome available for all, or nearly all, participants randomized?                                                                                           | PY                   |
|                                                           | 3.2 If N/PN/NI to 3.1: Is there evidence that result was not biased by missing outcome data?                                                                                        | NA                   |
|                                                           | 3.3 If N/PN to 3.2: Could missingness in the outcome depend on its true value?                                                                                                      | NA                   |
|                                                           | 3.4 If Y/PY/NI to 3.3: Is it likely that missingness in the outcome depended on its true value?                                                                                     | NA                   |
|                                                           | <b>Risk of bias judgement</b>                                                                                                                                                       | <b>Low</b>           |
| <b>Bias in measurement of the outcome</b>                 | 4.1 Was the method of measuring the outcome inappropriate?                                                                                                                          | PN                   |
|                                                           | 4.2 Could measurement or ascertainment of the outcome have differed between intervention groups?                                                                                    | PN                   |
|                                                           | 4.3 Were outcome assessors aware of the intervention received by study participants?                                                                                                | PY                   |
|                                                           | 4.4 If Y/PY/NI to 4.3: Could assessment of the outcome have been influenced by knowledge of intervention received?                                                                  | NI                   |
|                                                           | 4.5 If Y/PY/NI to 4.4: Is it likely that assessment of the outcome was influenced by knowledge of intervention received?                                                            | NI                   |
|                                                           | <b>Risk of bias judgement</b>                                                                                                                                                       | <b>High</b>          |
| <b>Bias in selection of the reported result</b>           | 5.1 Were the data that produced this result analysed in accordance with a pre-specified analysis plan that was finalized before unblinded outcome data were available for analysis? | PY                   |
|                                                           | 5.2 ... multiple eligible outcome measurements (e.g. scales, definitions, time points) within the outcome domain?                                                                   | NI                   |
|                                                           | 5.3 ... multiple eligible analyses of the data?                                                                                                                                     | NI                   |
|                                                           | <b>Risk of bias judgement</b>                                                                                                                                                       | <b>Some concerns</b> |
| <b>Overall bias</b>                                       | <b>Risk of bias judgement</b>                                                                                                                                                       | <b>High</b>          |

| Study                                                     | Alzahrani 2021                                                                                                                                                                      |                      |
|-----------------------------------------------------------|-------------------------------------------------------------------------------------------------------------------------------------------------------------------------------------|----------------------|
| Domain                                                    | Signalling question                                                                                                                                                                 | Response             |
| <b>Bias arising from the randomization process</b>        | 1.1 Was the allocation sequence random?                                                                                                                                             | Y                    |
|                                                           | 1.2 Was the allocation sequence concealed until participants were enrolled and assigned to interventions?                                                                           | PY                   |
|                                                           | 1.3 Did baseline differences between intervention groups suggest a problem with the randomization process?                                                                          | PN                   |
|                                                           | <b>Risk of bias judgement</b>                                                                                                                                                       | <b>Low</b>           |
| <b>Bias due to deviations from intended interventions</b> | 2.1. Were participants aware of their assigned intervention during the trial?                                                                                                       | PY                   |
|                                                           | 2.2. Were carers and people delivering the interventions aware of participants' assigned intervention during the trial?                                                             | PY                   |
|                                                           | 2.3. If Y/PY/NI to 2.1 or 2.2: Were there deviations from the intended intervention that arose because of the experimental context?                                                 | PN                   |
|                                                           | 2.4 If Y/PY to 2.3: Were these deviations likely to have affected the outcome?                                                                                                      | NA                   |
|                                                           | 2.5. If Y/PY/NI to 2.4: Were these deviations from intended intervention balanced between groups?                                                                                   | NA                   |
|                                                           | 2.6 Was an appropriate analysis used to estimate the effect of assignment to intervention?                                                                                          | PY                   |
|                                                           | 2.7 If N/PN/NI to 2.6: Was there potential for a substantial impact (on the result) of the failure to analyse participants in the group to which they were randomized?              | NA                   |
| <b>Risk of bias judgement</b>                             | <b>Low</b>                                                                                                                                                                          |                      |
| <b>Bias due to missing outcome data</b>                   | 3.1 Were data for this outcome available for all, or nearly all, participants randomized?                                                                                           | PY                   |
|                                                           | 3.2 If N/PN/NI to 3.1: Is there evidence that result was not biased by missing outcome data?                                                                                        | NA                   |
|                                                           | 3.3 If N/PN to 3.2: Could missingness in the outcome depend on its true value?                                                                                                      | NA                   |
|                                                           | 3.4 If Y/PY/NI to 3.3: Is it likely that missingness in the outcome depended on its true value?                                                                                     | NA                   |
|                                                           | <b>Risk of bias judgement</b>                                                                                                                                                       | <b>Low</b>           |
| <b>Bias in measurement of the outcome</b>                 | 4.1 Was the method of measuring the outcome inappropriate?                                                                                                                          | PN                   |
|                                                           | 4.2 Could measurement or ascertainment of the outcome have differed between intervention groups?                                                                                    | PN                   |
|                                                           | 4.3 Were outcome assessors aware of the intervention received by study participants?                                                                                                | PY                   |
|                                                           | 4.4 If Y/PY/NI to 4.3: Could assessment of the outcome have been influenced by knowledge of intervention received?                                                                  | NI                   |
|                                                           | 4.5 If Y/PY/NI to 4.4: Is it likely that assessment of the outcome was influenced by knowledge of intervention received?                                                            | PN                   |
|                                                           | <b>Risk of bias judgement</b>                                                                                                                                                       | <b>Some concerns</b> |
| <b>Bias in selection of the reported result</b>           | 5.1 Were the data that produced this result analysed in accordance with a pre-specified analysis plan that was finalized before unblinded outcome data were available for analysis? | PY                   |
|                                                           | 5.2 ... multiple eligible outcome measurements (e.g. scales, definitions, time points) within the outcome domain?                                                                   | NI                   |
|                                                           | 5.3 ... multiple eligible analyses of the data?                                                                                                                                     | NI                   |
|                                                           | <b>Risk of bias judgement</b>                                                                                                                                                       | <b>Some concerns</b> |
| <b>Overall bias</b>                                       | <b>Risk of bias judgement</b>                                                                                                                                                       | <b>Some concerns</b> |

| Study                                                     | Ünal 2020                                                                                                                                                                           |                      |
|-----------------------------------------------------------|-------------------------------------------------------------------------------------------------------------------------------------------------------------------------------------|----------------------|
| Domain                                                    | Signalling question                                                                                                                                                                 | Response             |
| <b>Bias arising from the randomization process</b>        | 1.1 Was the allocation sequence random?                                                                                                                                             | Y                    |
|                                                           | 1.2 Was the allocation sequence concealed until participants were enrolled and assigned to interventions?                                                                           | PY                   |
|                                                           | 1.3 Did baseline differences between intervention groups suggest a problem with the randomization process?                                                                          | PN                   |
|                                                           | <b>Risk of bias judgement</b>                                                                                                                                                       | <b>Low</b>           |
| <b>Bias due to deviations from intended interventions</b> | 2.1. Were participants aware of their assigned intervention during the trial?                                                                                                       | PY                   |
|                                                           | 2.2. Were carers and people delivering the interventions aware of participants' assigned intervention during the trial?                                                             | PY                   |
|                                                           | 2.3. If Y/PY/NI to 2.1 or 2.2: Were there deviations from the intended intervention that arose because of the experimental context?                                                 | Y                    |
|                                                           | 2.4 If Y/PY to 2.3: Were these deviations likely to have affected the outcome?                                                                                                      | PN                   |
|                                                           | 2.5. If Y/PY/NI to 2.4: Were these deviations from intended intervention balanced between groups?                                                                                   | NA                   |
|                                                           | 2.6 Was an appropriate analysis used to estimate the effect of assignment to intervention?                                                                                          | PN                   |
|                                                           | 2.7 If N/PN/NI to 2.6: Was there potential for a substantial impact (on the result) of the failure to analyse participants in the group to which they were randomized?              | PN                   |
| <b>Risk of bias judgement</b>                             | <b>Some concerns</b>                                                                                                                                                                |                      |
| <b>Bias due to missing outcome data</b>                   | 3.1 Were data for this outcome available for all, or nearly all, participants randomized?                                                                                           | PY                   |
|                                                           | 3.2 If N/PN/NI to 3.1: Is there evidence that result was not biased by missing outcome data?                                                                                        | NA                   |
|                                                           | 3.3 If N/PN to 3.2: Could missingness in the outcome depend on its true value?                                                                                                      | NA                   |
|                                                           | 3.4 If Y/PY/NI to 3.3: Is it likely that missingness in the outcome depended on its true value?                                                                                     | NA                   |
|                                                           | <b>Risk of bias judgement</b>                                                                                                                                                       | <b>Low</b>           |
| <b>Bias in measurement of the outcome</b>                 | 4.1 Was the method of measuring the outcome inappropriate?                                                                                                                          | PN                   |
|                                                           | 4.2 Could measurement or ascertainment of the outcome have differed between intervention groups?                                                                                    | PN                   |
|                                                           | 4.3 Were outcome assessors aware of the intervention received by study participants?                                                                                                | PN                   |
|                                                           | 4.4 If Y/PY/NI to 4.3: Could assessment of the outcome have been influenced by knowledge of intervention received?                                                                  | NA                   |
|                                                           | 4.5 If Y/PY/NI to 4.4: Is it likely that assessment of the outcome was influenced by knowledge of intervention received?                                                            | NA                   |
|                                                           | <b>Risk of bias judgement</b>                                                                                                                                                       | <b>Low</b>           |
| <b>Bias in selection of the reported result</b>           | 5.1 Were the data that produced this result analysed in accordance with a pre-specified analysis plan that was finalized before unblinded outcome data were available for analysis? | PY                   |
|                                                           | 5.2 ... multiple eligible outcome measurements (e.g. scales, definitions, time points) within the outcome domain?                                                                   | NI                   |
|                                                           | 5.3 ... multiple eligible analyses of the data?                                                                                                                                     | NI                   |
|                                                           | <b>Risk of bias judgement</b>                                                                                                                                                       | <b>Some concerns</b> |
| <b>Overall bias</b>                                       | <b>Risk of bias judgement</b>                                                                                                                                                       | <b>Some concerns</b> |

| Study                                              | Soleymani 2020                                                                                                                                                                      |                      |
|----------------------------------------------------|-------------------------------------------------------------------------------------------------------------------------------------------------------------------------------------|----------------------|
| Domain                                             | Signalling question                                                                                                                                                                 | Response             |
| Bias arising from the randomization process        | 1.1 Was the allocation sequence random?                                                                                                                                             | Y                    |
|                                                    | 1.2 Was the allocation sequence concealed until participants were enrolled and assigned to interventions?                                                                           | PY                   |
|                                                    | 1.3 Did baseline differences between intervention groups suggest a problem with the randomization process?                                                                          | PN                   |
|                                                    | <b>Risk of bias judgement</b>                                                                                                                                                       | <b>Low</b>           |
| Bias due to deviations from intended interventions | 2.1. Were participants aware of their assigned intervention during the trial?                                                                                                       | PY                   |
|                                                    | 2.2. Were carers and people delivering the interventions aware of participants' assigned intervention during the trial?                                                             | PY                   |
|                                                    | 2.3. If Y/PY/NI to 2.1 or 2.2: Were there deviations from the intended intervention that arose because of the experimental context?                                                 | PN                   |
|                                                    | 2.4 If Y/PY to 2.3: Were these deviations likely to have affected the outcome?                                                                                                      | NA                   |
|                                                    | 2.5. If Y/PY/NI to 2.4: Were these deviations from intended intervention balanced between groups?                                                                                   | NA                   |
|                                                    | 2.6 Was an appropriate analysis used to estimate the effect of assignment to intervention?                                                                                          | PY                   |
|                                                    | 2.7 If N/PN/NI to 2.6: Was there potential for a substantial impact (on the result) of the failure to analyse participants in the group to which they were randomized?              | NA                   |
| <b>Risk of bias judgement</b>                      | <b>Low</b>                                                                                                                                                                          |                      |
| Bias due to missing outcome data                   | 3.1 Were data for this outcome available for all, or nearly all, participants randomized?                                                                                           | PN                   |
|                                                    | 3.2 If N/PN/NI to 3.1: Is there evidence that result was not biased by missing outcome data?                                                                                        | PN                   |
|                                                    | 3.3 If N/PN to 3.2: Could missingness in the outcome depend on its true value?                                                                                                      | PY                   |
|                                                    | 3.4 If Y/PY/NI to 3.3: Is it likely that missingness in the outcome depended on its true value?                                                                                     | PN                   |
|                                                    | <b>Risk of bias judgement</b>                                                                                                                                                       | <b>Some concerns</b> |
| Bias in measurement of the outcome                 | 4.1 Was the method of measuring the outcome inappropriate?                                                                                                                          | PN                   |
|                                                    | 4.2 Could measurement or ascertainment of the outcome have differed between intervention groups?                                                                                    | PN                   |
|                                                    | 4.3 Were outcome assessors aware of the intervention received by study participants?                                                                                                | PY                   |
|                                                    | 4.4 If Y/PY/NI to 4.3: Could assessment of the outcome have been influenced by knowledge of intervention received?                                                                  | PY                   |
|                                                    | 4.5 If Y/PY/NI to 4.4: Is it likely that assessment of the outcome was influenced by knowledge of intervention received?                                                            | PN                   |
|                                                    | <b>Risk of bias judgement</b>                                                                                                                                                       | <b>Some concerns</b> |
| Bias in selection of the reported result           | 5.1 Were the data that produced this result analysed in accordance with a pre-specified analysis plan that was finalized before unblinded outcome data were available for analysis? | PY                   |
|                                                    | 5.2 ... multiple eligible outcome measurements (e.g. scales, definitions, time points) within the outcome domain?                                                                   | NI                   |
|                                                    | 5.3 ... multiple eligible analyses of the data?                                                                                                                                     | NI                   |
|                                                    | <b>Risk of bias judgement</b>                                                                                                                                                       | <b>Some concerns</b> |
| Overall bias                                       | <b>Risk of bias judgement</b>                                                                                                                                                       | <b>Some concerns</b> |



| Study                                                     | Schlicker 2020                                                                                                                                                                      |             |
|-----------------------------------------------------------|-------------------------------------------------------------------------------------------------------------------------------------------------------------------------------------|-------------|
| Domain                                                    | Signalling question                                                                                                                                                                 | Response    |
| <b>Bias arising from the randomization process</b>        | 1.1 Was the allocation sequence random?                                                                                                                                             | Y           |
|                                                           | 1.2 Was the allocation sequence concealed until participants were enrolled and assigned to interventions?                                                                           | Y           |
|                                                           | 1.3 Did baseline differences between intervention groups suggest a problem with the randomization process?                                                                          | PN          |
|                                                           | <b>Risk of bias judgement</b>                                                                                                                                                       | <b>Low</b>  |
| <b>Bias due to deviations from intended interventions</b> | 2.1. Were participants aware of their assigned intervention during the trial?                                                                                                       | Y           |
|                                                           | 2.2. Were carers and people delivering the interventions aware of participants' assigned intervention during the trial?                                                             | PY          |
|                                                           | 2.3. If Y/PY/NI to 2.1 or 2.2: Were there deviations from the intended intervention that arose because of the experimental context?                                                 | PY          |
|                                                           | 2.4 If Y/PY to 2.3: Were these deviations likely to have affected the outcome?                                                                                                      | PY          |
|                                                           | 2.5. If Y/PY/NI to 2.4: Were these deviations from intended intervention balanced between groups?                                                                                   | PY          |
|                                                           | 2.6 Was an appropriate analysis used to estimate the effect of assignment to intervention?                                                                                          | Y           |
|                                                           | 2.7 If N/PN/NI to 2.6: Was there potential for a substantial impact (on the result) of the failure to analyse participants in the group to which they were randomized?              | NA          |
| <b>Risk of bias judgement</b>                             | <b>Some concerns</b>                                                                                                                                                                |             |
| <b>Bias due to missing outcome data</b>                   | 3.1 Were data for this outcome available for all, or nearly all, participants randomized?                                                                                           | Y           |
|                                                           | 3.2 If N/PN/NI to 3.1: Is there evidence that result was not biased by missing outcome data?                                                                                        | NA          |
|                                                           | 3.3 If N/PN to 3.2: Could missingness in the outcome depend on its true value?                                                                                                      | NA          |
|                                                           | 3.4 If Y/PY/NI to 3.3: Is it likely that missingness in the outcome depended on its true value?                                                                                     | NA          |
|                                                           | <b>Risk of bias judgement</b>                                                                                                                                                       | <b>Low</b>  |
| <b>Bias in measurement of the outcome</b>                 | 4.1 Was the method of measuring the outcome inappropriate?                                                                                                                          | PN          |
|                                                           | 4.2 Could measurement or ascertainment of the outcome have differed between intervention groups?                                                                                    | PN          |
|                                                           | 4.3 Were outcome assessors aware of the intervention received by study participants?                                                                                                | PY          |
|                                                           | 4.4 If Y/PY/NI to 4.3: Could assessment of the outcome have been influenced by knowledge of intervention received?                                                                  | PY          |
|                                                           | 4.5 If Y/PY/NI to 4.4: Is it likely that assessment of the outcome was influenced by knowledge of intervention received?                                                            | PY          |
|                                                           | <b>Risk of bias judgement</b>                                                                                                                                                       | <b>High</b> |
| <b>Bias in selection of the reported result</b>           | 5.1 Were the data that produced this result analysed in accordance with a pre-specified analysis plan that was finalized before unblinded outcome data were available for analysis? | PY          |
|                                                           | 5.2 ... multiple eligible outcome measurements (e.g. scales, definitions, time points) within the outcome domain?                                                                   | PN          |
|                                                           | 5.3 ... multiple eligible analyses of the data?                                                                                                                                     | PN          |
|                                                           | <b>Risk of bias judgement</b>                                                                                                                                                       | <b>Low</b>  |
| <b>Overall bias</b>                                       | <b>Risk of bias judgement</b>                                                                                                                                                       | <b>High</b> |

| Study                                                     | de Oliveira Meirelles 2020                                                                                                                                                          |                      |
|-----------------------------------------------------------|-------------------------------------------------------------------------------------------------------------------------------------------------------------------------------------|----------------------|
| Domain                                                    | Signalling question                                                                                                                                                                 | Response             |
| <b>Bias arising from the randomization process</b>        | 1.1 Was the allocation sequence random?                                                                                                                                             | Y                    |
|                                                           | 1.2 Was the allocation sequence concealed until participants were enrolled and assigned to interventions?                                                                           | Y                    |
|                                                           | 1.3 Did baseline differences between intervention groups suggest a problem with the randomization process?                                                                          | PN                   |
|                                                           | <b>Risk of bias judgement</b>                                                                                                                                                       | <b>Low</b>           |
| <b>Bias due to deviations from intended interventions</b> | 2.1. Were participants aware of their assigned intervention during the trial?                                                                                                       | PY                   |
|                                                           | 2.2. Were carers and people delivering the interventions aware of participants' assigned intervention during the trial?                                                             | N                    |
|                                                           | 2.3. If Y/PY/NI to 2.1 or 2.2: Were there deviations from the intended intervention that arose because of the experimental context?                                                 | PN                   |
|                                                           | 2.4 If Y/PY to 2.3: Were these deviations likely to have affected the outcome?                                                                                                      | NA                   |
|                                                           | 2.5. If Y/PY/NI to 2.4: Were these deviations from intended intervention balanced between groups?                                                                                   | NA                   |
|                                                           | 2.6 Was an appropriate analysis used to estimate the effect of assignment to intervention?                                                                                          | PY                   |
|                                                           | 2.7 If N/PN/NI to 2.6: Was there potential for a substantial impact (on the result) of the failure to analyse participants in the group to which they were randomized?              | NA                   |
| <b>Risk of bias judgement</b>                             | <b>Low</b>                                                                                                                                                                          |                      |
| <b>Bias due to missing outcome data</b>                   | 3.1 Were data for this outcome available for all, or nearly all, participants randomized?                                                                                           | PY                   |
|                                                           | 3.2 If N/PN/NI to 3.1: Is there evidence that result was not biased by missing outcome data?                                                                                        | NA                   |
|                                                           | 3.3 If N/PN to 3.2: Could missingness in the outcome depend on its true value?                                                                                                      | NA                   |
|                                                           | 3.4 If Y/PY/NI to 3.3: Is it likely that missingness in the outcome depended on its true value?                                                                                     | NA                   |
|                                                           | <b>Risk of bias judgement</b>                                                                                                                                                       | <b>Low</b>           |
| <b>Bias in measurement of the outcome</b>                 | 4.1 Was the method of measuring the outcome inappropriate?                                                                                                                          | PN                   |
|                                                           | 4.2 Could measurement or ascertainment of the outcome have differed between intervention groups?                                                                                    | PN                   |
|                                                           | 4.3 Were outcome assessors aware of the intervention received by study participants?                                                                                                | N                    |
|                                                           | 4.4 If Y/PY/NI to 4.3: Could assessment of the outcome have been influenced by knowledge of intervention received?                                                                  | NA                   |
|                                                           | 4.5 If Y/PY/NI to 4.4: Is it likely that assessment of the outcome was influenced by knowledge of intervention received?                                                            | NA                   |
|                                                           | <b>Risk of bias judgement</b>                                                                                                                                                       | <b>Low</b>           |
| <b>Bias in selection of the reported result</b>           | 5.1 Were the data that produced this result analysed in accordance with a pre-specified analysis plan that was finalized before unblinded outcome data were available for analysis? | PY                   |
|                                                           | 5.2 ... multiple eligible outcome measurements (e.g. scales, definitions, time points) within the outcome domain?                                                                   | NI                   |
|                                                           | 5.3 ... multiple eligible analyses of the data?                                                                                                                                     | NI                   |
|                                                           | <b>Risk of bias judgement</b>                                                                                                                                                       | <b>Some concerns</b> |
| <b>Overall bias</b>                                       | <b>Risk of bias judgement</b>                                                                                                                                                       | <b>Some concerns</b> |

| Study                                                     | Suh 2019                                                                                                                                                                            |                      |
|-----------------------------------------------------------|-------------------------------------------------------------------------------------------------------------------------------------------------------------------------------------|----------------------|
| Domain                                                    | Signalling question                                                                                                                                                                 | Response             |
| <b>Bias arising from the randomization process</b>        | 1.1 Was the allocation sequence random?                                                                                                                                             | Y                    |
|                                                           | 1.2 Was the allocation sequence concealed until participants were enrolled and assigned to interventions?                                                                           | PY                   |
|                                                           | 1.3 Did baseline differences between intervention groups suggest a problem with the randomization process?                                                                          | PY                   |
|                                                           | <b>Risk of bias judgement</b>                                                                                                                                                       | <b>Some concerns</b> |
| <b>Bias due to deviations from intended interventions</b> | 2.1. Were participants aware of their assigned intervention during the trial?                                                                                                       | Y                    |
|                                                           | 2.2. Were carers and people delivering the interventions aware of participants' assigned intervention during the trial?                                                             | PY                   |
|                                                           | 2.3. If Y/PY/NI to 2.1 or 2.2: Were there deviations from the intended intervention that arose because of the experimental context?                                                 | PY                   |
|                                                           | 2.4 If Y/PY to 2.3: Were these deviations likely to have affected the outcome?                                                                                                      | PY                   |
|                                                           | 2.5. If Y/PY/NI to 2.4: Were these deviations from intended intervention balanced between groups?                                                                                   | PY                   |
|                                                           | 2.6 Was an appropriate analysis used to estimate the effect of assignment to intervention?                                                                                          | Y                    |
|                                                           | 2.7 If N/PN/NI to 2.6: Was there potential for a substantial impact (on the result) of the failure to analyse participants in the group to which they were randomized?              | NA                   |
| <b>Risk of bias judgement</b>                             | <b>Some concerns</b>                                                                                                                                                                |                      |
| <b>Bias due to missing outcome data</b>                   | 3.1 Were data for this outcome available for all, or nearly all, participants randomized?                                                                                           | PN                   |
|                                                           | 3.2 If N/PN/NI to 3.1: Is there evidence that result was not biased by missing outcome data?                                                                                        | PY                   |
|                                                           | 3.3 If N/PN to 3.2: Could missingness in the outcome depend on its true value?                                                                                                      | NA                   |
|                                                           | 3.4 If Y/PY/NI to 3.3: Is it likely that missingness in the outcome depended on its true value?                                                                                     | NA                   |
|                                                           | <b>Risk of bias judgement</b>                                                                                                                                                       | <b>Low</b>           |
| <b>Bias in measurement of the outcome</b>                 | 4.1 Was the method of measuring the outcome inappropriate?                                                                                                                          | PN                   |
|                                                           | 4.2 Could measurement or ascertainment of the outcome have differed between intervention groups?                                                                                    | PN                   |
|                                                           | 4.3 Were outcome assessors aware of the intervention received by study participants?                                                                                                | PY                   |
|                                                           | 4.4 If Y/PY/NI to 4.3: Could assessment of the outcome have been influenced by knowledge of intervention received?                                                                  | PN                   |
|                                                           | 4.5 If Y/PY/NI to 4.4: Is it likely that assessment of the outcome was influenced by knowledge of intervention received?                                                            | NA                   |
|                                                           | <b>Risk of bias judgement</b>                                                                                                                                                       | <b>Low</b>           |
| <b>Bias in selection of the reported result</b>           | 5.1 Were the data that produced this result analysed in accordance with a pre-specified analysis plan that was finalized before unblinded outcome data were available for analysis? | PY                   |
|                                                           | 5.2 ... multiple eligible outcome measurements (e.g. scales, definitions, time points) within the outcome domain?                                                                   | NI                   |
|                                                           | 5.3 ... multiple eligible analyses of the data?                                                                                                                                     | NI                   |
|                                                           | <b>Risk of bias judgement</b>                                                                                                                                                       | <b>Some concerns</b> |
| <b>Overall bias</b>                                       | <b>Risk of bias judgement</b>                                                                                                                                                       | <b>Some concerns</b> |

| Study                                                     | Petrozzi 2019                                                                                                                                                                       |                      |
|-----------------------------------------------------------|-------------------------------------------------------------------------------------------------------------------------------------------------------------------------------------|----------------------|
| Domain                                                    | Signalling question                                                                                                                                                                 | Response             |
| <b>Bias arising from the randomization process</b>        | 1.1 Was the allocation sequence random?                                                                                                                                             | Y                    |
|                                                           | 1.2 Was the allocation sequence concealed until participants were enrolled and assigned to interventions?                                                                           | Y                    |
|                                                           | 1.3 Did baseline differences between intervention groups suggest a problem with the randomization process?                                                                          | PY                   |
|                                                           | <b>Risk of bias judgement</b>                                                                                                                                                       | <b>Some concerns</b> |
| <b>Bias due to deviations from intended interventions</b> | 2.1. Were participants aware of their assigned intervention during the trial?                                                                                                       | PY                   |
|                                                           | 2.2. Were carers and people delivering the interventions aware of participants' assigned intervention during the trial?                                                             | PN                   |
|                                                           | 2.3. If Y/PY/NI to 2.1 or 2.2: Were there deviations from the intended intervention that arose because of the experimental context?                                                 | PN                   |
|                                                           | 2.4 If Y/PY to 2.3: Were these deviations likely to have affected the outcome?                                                                                                      | NA                   |
|                                                           | 2.5. If Y/PY/NI to 2.4: Were these deviations from intended intervention balanced between groups?                                                                                   | NA                   |
|                                                           | 2.6 Was an appropriate analysis used to estimate the effect of assignment to intervention?                                                                                          | PY                   |
|                                                           | 2.7 If N/PN/NI to 2.6: Was there potential for a substantial impact (on the result) of the failure to analyse participants in the group to which they were randomized?              | NA                   |
|                                                           | <b>Risk of bias judgement</b>                                                                                                                                                       | <b>Low</b>           |
| <b>Bias due to missing outcome data</b>                   | 3.1 Were data for this outcome available for all, or nearly all, participants randomized?                                                                                           | PN                   |
|                                                           | 3.2 If N/PN/NI to 3.1: Is there evidence that result was not biased by missing outcome data?                                                                                        | PN                   |
|                                                           | 3.3 If N/PN to 3.2: Could missingness in the outcome depend on its true value?                                                                                                      | PY                   |
|                                                           | 3.4 If Y/PY/NI to 3.3: Is it likely that missingness in the outcome depended on its true value?                                                                                     | PN                   |
|                                                           | <b>Risk of bias judgement</b>                                                                                                                                                       | <b>Some concerns</b> |
| <b>Bias in measurement of the outcome</b>                 | 4.1 Was the method of measuring the outcome inappropriate?                                                                                                                          | PN                   |
|                                                           | 4.2 Could measurement or ascertainment of the outcome have differed between intervention groups?                                                                                    | PN                   |
|                                                           | 4.3 Were outcome assessors aware of the intervention received by study participants?                                                                                                | PN                   |
|                                                           | 4.4 If Y/PY/NI to 4.3: Could assessment of the outcome have been influenced by knowledge of intervention received?                                                                  | NA                   |
|                                                           | 4.5 If Y/PY/NI to 4.4: Is it likely that assessment of the outcome was influenced by knowledge of intervention received?                                                            | NA                   |
|                                                           | <b>Risk of bias judgement</b>                                                                                                                                                       | <b>Low</b>           |
| <b>Bias in selection of the reported result</b>           | 5.1 Were the data that produced this result analysed in accordance with a pre-specified analysis plan that was finalized before unblinded outcome data were available for analysis? | PY                   |
|                                                           | 5.2 ... multiple eligible outcome measurements (e.g. scales, definitions, time points) within the outcome domain?                                                                   | NI                   |
|                                                           | 5.3 ... multiple eligible analyses of the data?                                                                                                                                     | NI                   |
|                                                           | <b>Risk of bias judgement</b>                                                                                                                                                       | <b>Some concerns</b> |
| <b>Overall bias</b>                                       | <b>Risk of bias judgement</b>                                                                                                                                                       | <b>Some concerns</b> |

| Study                                              | Mariano 2019                                                                                                                                                                        |                      |
|----------------------------------------------------|-------------------------------------------------------------------------------------------------------------------------------------------------------------------------------------|----------------------|
| Domain                                             | Signalling question                                                                                                                                                                 | Response             |
| Bias arising from the randomization process        | 1.1 Was the allocation sequence random?                                                                                                                                             | Y                    |
|                                                    | 1.2 Was the allocation sequence concealed until participants were enrolled and assigned to interventions?                                                                           | NI                   |
|                                                    | 1.3 Did baseline differences between intervention groups suggest a problem with the randomization process?                                                                          | PN                   |
|                                                    | <b>Risk of bias judgement</b>                                                                                                                                                       | <b>Some concerns</b> |
| Bias due to deviations from intended interventions | 2.1. Were participants aware of their assigned intervention during the trial?                                                                                                       | PY                   |
|                                                    | 2.2. Were carers and people delivering the interventions aware of participants' assigned intervention during the trial?                                                             | PY                   |
|                                                    | 2.3. If Y/PY/NI to 2.1 or 2.2: Were there deviations from the intended intervention that arose because of the experimental context?                                                 | PN                   |
|                                                    | 2.4 If Y/PY to 2.3: Were these deviations likely to have affected the outcome?                                                                                                      | NA                   |
|                                                    | 2.5. If Y/PY/NI to 2.4: Were these deviations from intended intervention balanced between groups?                                                                                   | NA                   |
|                                                    | 2.6 Was an appropriate analysis used to estimate the effect of assignment to intervention?                                                                                          | PY                   |
|                                                    | 2.7 If N/PN/NI to 2.6: Was there potential for a substantial impact (on the result) of the failure to analyse participants in the group to which they were randomized?              | NA                   |
|                                                    | <b>Risk of bias judgement</b>                                                                                                                                                       | <b>Low</b>           |
| Bias due to missing outcome data                   | 3.1 Were data for this outcome available for all, or nearly all, participants randomized?                                                                                           | PY                   |
|                                                    | 3.2 If N/PN/NI to 3.1: Is there evidence that result was not biased by missing outcome data?                                                                                        | NA                   |
|                                                    | 3.3 If N/PN to 3.2: Could missingness in the outcome depend on its true value?                                                                                                      | NA                   |
|                                                    | 3.4 If Y/PY/NI to 3.3: Is it likely that missingness in the outcome depended on its true value?                                                                                     | NA                   |
|                                                    | <b>Risk of bias judgement</b>                                                                                                                                                       | <b>Low</b>           |
| Bias in measurement of the outcome                 | 4.1 Was the method of measuring the outcome inappropriate?                                                                                                                          | PN                   |
|                                                    | 4.2 Could measurement or ascertainment of the outcome have differed between intervention groups?                                                                                    | PN                   |
|                                                    | 4.3 Were outcome assessors aware of the intervention received by study participants?                                                                                                | PY                   |
|                                                    | 4.4 If Y/PY/NI to 4.3: Could assessment of the outcome have been influenced by knowledge of intervention received?                                                                  | PN                   |
|                                                    | 4.5 If Y/PY/NI to 4.4: Is it likely that assessment of the outcome was influenced by knowledge of intervention received?                                                            | NA                   |
|                                                    | <b>Risk of bias judgement</b>                                                                                                                                                       | <b>Low</b>           |
| Bias in selection of the reported result           | 5.1 Were the data that produced this result analysed in accordance with a pre-specified analysis plan that was finalized before unblinded outcome data were available for analysis? | PY                   |
|                                                    | 5.2 ... multiple eligible outcome measurements (e.g. scales, definitions, time points) within the outcome domain?                                                                   | NI                   |
|                                                    | 5.3 ... multiple eligible analyses of the data?                                                                                                                                     | NI                   |
|                                                    | <b>Risk of bias judgement</b>                                                                                                                                                       | <b>Some concerns</b> |
| Overall bias                                       | <b>Risk of bias judgement</b>                                                                                                                                                       | <b>Some concerns</b> |

| Study                                                     | Hüppe 2019                                                                                                                                                                          |                      |
|-----------------------------------------------------------|-------------------------------------------------------------------------------------------------------------------------------------------------------------------------------------|----------------------|
| Domain                                                    | Signalling question                                                                                                                                                                 | Response             |
| <b>Bias arising from the randomization process</b>        | 1.1 Was the allocation sequence random?                                                                                                                                             | Y                    |
|                                                           | 1.2 Was the allocation sequence concealed until participants were enrolled and assigned to interventions?                                                                           | PY                   |
|                                                           | 1.3 Did baseline differences between intervention groups suggest a problem with the randomization process?                                                                          | PN                   |
|                                                           | <b>Risk of bias judgement</b>                                                                                                                                                       | <b>Low</b>           |
| <b>Bias due to deviations from intended interventions</b> | 2.1. Were participants aware of their assigned intervention during the trial?                                                                                                       | PY                   |
|                                                           | 2.2. Were carers and people delivering the interventions aware of participants' assigned intervention during the trial?                                                             | PY                   |
|                                                           | 2.3. If Y/PY/NI to 2.1 or 2.2: Were there deviations from the intended intervention that arose because of the experimental context?                                                 | PY                   |
|                                                           | 2.4 If Y/PY to 2.3: Were these deviations likely to have affected the outcome?                                                                                                      | PY                   |
|                                                           | 2.5. If Y/PY/NI to 2.4: Were these deviations from intended intervention balanced between groups?                                                                                   | PY                   |
|                                                           | 2.6 Was an appropriate analysis used to estimate the effect of assignment to intervention?                                                                                          | PN                   |
|                                                           | 2.7 If N/PN/NI to 2.6: Was there potential for a substantial impact (on the result) of the failure to analyse participants in the group to which they were randomized?              | PN                   |
|                                                           | <b>Risk of bias judgement</b>                                                                                                                                                       | <b>Some concerns</b> |
| <b>Bias due to missing outcome data</b>                   | 3.1 Were data for this outcome available for all, or nearly all, participants randomized?                                                                                           | PN                   |
|                                                           | 3.2 If N/PN/NI to 3.1: Is there evidence that result was not biased by missing outcome data?                                                                                        | PN                   |
|                                                           | 3.3 If N/PN to 3.2: Could missingness in the outcome depend on its true value?                                                                                                      | PY                   |
|                                                           | 3.4 If Y/PY/NI to 3.3: Is it likely that missingness in the outcome depended on its true value?                                                                                     | PY                   |
|                                                           | <b>Risk of bias judgement</b>                                                                                                                                                       | <b>High</b>          |
| <b>Bias in measurement of the outcome</b>                 | 4.1 Was the method of measuring the outcome inappropriate?                                                                                                                          | PN                   |
|                                                           | 4.2 Could measurement or ascertainment of the outcome have differed between intervention groups?                                                                                    | PN                   |
|                                                           | 4.3 Were outcome assessors aware of the intervention received by study participants?                                                                                                | PY                   |
|                                                           | 4.4 If Y/PY/NI to 4.3: Could assessment of the outcome have been influenced by knowledge of intervention received?                                                                  | PN                   |
|                                                           | 4.5 If Y/PY/NI to 4.4: Is it likely that assessment of the outcome was influenced by knowledge of intervention received?                                                            | NA                   |
|                                                           | <b>Risk of bias judgement</b>                                                                                                                                                       | <b>Low</b>           |
| <b>Bias in selection of the reported result</b>           | 5.1 Were the data that produced this result analysed in accordance with a pre-specified analysis plan that was finalized before unblinded outcome data were available for analysis? | PN                   |
|                                                           | 5.2 ... multiple eligible outcome measurements (e.g. scales, definitions, time points) within the outcome domain?                                                                   | NI                   |
|                                                           | 5.3 ... multiple eligible analyses of the data?                                                                                                                                     | NI                   |
|                                                           | <b>Risk of bias judgement</b>                                                                                                                                                       | <b>Some concerns</b> |
| <b>Overall bias</b>                                       | <b>Risk of bias judgement</b>                                                                                                                                                       | <b>High</b>          |

| Study                                                     | Huber 2019                                                                                                                                                                          |                      |
|-----------------------------------------------------------|-------------------------------------------------------------------------------------------------------------------------------------------------------------------------------------|----------------------|
| Domain                                                    | Signalling question                                                                                                                                                                 | Response             |
| <b>Bias arising from the randomization process</b>        | 1.1 Was the allocation sequence random?                                                                                                                                             | Y                    |
|                                                           | 1.2 Was the allocation sequence concealed until participants were enrolled and assigned to interventions?                                                                           | PY                   |
|                                                           | 1.3 Did baseline differences between intervention groups suggest a problem with the randomization process?                                                                          | PN                   |
|                                                           | <b>Risk of bias judgement</b>                                                                                                                                                       | <b>Low</b>           |
| <b>Bias due to deviations from intended interventions</b> | 2.1. Were participants aware of their assigned intervention during the trial?                                                                                                       | PY                   |
|                                                           | 2.2. Were carers and people delivering the interventions aware of participants' assigned intervention during the trial?                                                             | PY                   |
|                                                           | 2.3. If Y/PY/NI to 2.1 or 2.2: Were there deviations from the intended intervention that arose because of the experimental context?                                                 | PY                   |
|                                                           | 2.4 If Y/PY to 2.3: Were these deviations likely to have affected the outcome?                                                                                                      | PY                   |
|                                                           | 2.5. If Y/PY/NI to 2.4: Were these deviations from intended intervention balanced between groups?                                                                                   | PY                   |
|                                                           | 2.6 Was an appropriate analysis used to estimate the effect of assignment to intervention?                                                                                          | PY                   |
|                                                           | 2.7 If N/PN/NI to 2.6: Was there potential for a substantial impact (on the result) of the failure to analyse participants in the group to which they were randomized?              | NA                   |
| <b>Risk of bias judgement</b>                             | <b>Some concerns</b>                                                                                                                                                                |                      |
| <b>Bias due to missing outcome data</b>                   | 3.1 Were data for this outcome available for all, or nearly all, participants randomized?                                                                                           | PY                   |
|                                                           | 3.2 If N/PN/NI to 3.1: Is there evidence that result was not biased by missing outcome data?                                                                                        | NA                   |
|                                                           | 3.3 If N/PN to 3.2: Could missingness in the outcome depend on its true value?                                                                                                      | NA                   |
|                                                           | 3.4 If Y/PY/NI to 3.3: Is it likely that missingness in the outcome depended on its true value?                                                                                     | NA                   |
|                                                           | <b>Risk of bias judgement</b>                                                                                                                                                       | <b>Low</b>           |
| <b>Bias in measurement of the outcome</b>                 | 4.1 Was the method of measuring the outcome inappropriate?                                                                                                                          | PN                   |
|                                                           | 4.2 Could measurement or ascertainment of the outcome have differed between intervention groups?                                                                                    | PN                   |
|                                                           | 4.3 Were outcome assessors aware of the intervention received by study participants?                                                                                                | PY                   |
|                                                           | 4.4 If Y/PY/NI to 4.3: Could assessment of the outcome have been influenced by knowledge of intervention received?                                                                  | PY                   |
|                                                           | 4.5 If Y/PY/NI to 4.4: Is it likely that assessment of the outcome was influenced by knowledge of intervention received?                                                            | PY                   |
|                                                           | <b>Risk of bias judgement</b>                                                                                                                                                       | <b>High</b>          |
| <b>Bias in selection of the reported result</b>           | 5.1 Were the data that produced this result analysed in accordance with a pre-specified analysis plan that was finalized before unblinded outcome data were available for analysis? | PY                   |
|                                                           | 5.2 ... multiple eligible outcome measurements (e.g. scales, definitions, time points) within the outcome domain?                                                                   | NI                   |
|                                                           | 5.3 ... multiple eligible analyses of the data?                                                                                                                                     | NI                   |
|                                                           | <b>Risk of bias judgement</b>                                                                                                                                                       | <b>Some concerns</b> |
| <b>Overall bias</b>                                       | <b>Risk of bias judgement</b>                                                                                                                                                       | <b>High</b>          |

| Study                                              | Gardner 2019                                                                                                                                                                        |            |
|----------------------------------------------------|-------------------------------------------------------------------------------------------------------------------------------------------------------------------------------------|------------|
| Domain                                             | Signalling question                                                                                                                                                                 | Response   |
| Bias arising from the randomization process        | 1.1 Was the allocation sequence random?                                                                                                                                             | Y          |
|                                                    | 1.2 Was the allocation sequence concealed until participants were enrolled and assigned to interventions?                                                                           | PY         |
|                                                    | 1.3 Did baseline differences between intervention groups suggest a problem with the randomization process?                                                                          | PN         |
|                                                    | <b>Risk of bias judgement</b>                                                                                                                                                       | <b>Low</b> |
| Bias due to deviations from intended interventions | 2.1. Were participants aware of their assigned intervention during the trial?                                                                                                       | PY         |
|                                                    | 2.2. Were carers and people delivering the interventions aware of participants' assigned intervention during the trial?                                                             | PN         |
|                                                    | 2.3. If Y/PY/NI to 2.1 or 2.2: Were there deviations from the intended intervention that arose because of the experimental context?                                                 | PN         |
|                                                    | 2.4 If Y/PY to 2.3: Were these deviations likely to have affected the outcome?                                                                                                      | NA         |
|                                                    | 2.5. If Y/PY/NI to 2.4: Were these deviations from intended intervention balanced between groups?                                                                                   | NA         |
|                                                    | 2.6 Was an appropriate analysis used to estimate the effect of assignment to intervention?                                                                                          | PY         |
|                                                    | 2.7 If N/PN/NI to 2.6: Was there potential for a substantial impact (on the result) of the failure to analyse participants in the group to which they were randomized?              | NA         |
| <b>Risk of bias judgement</b>                      | <b>Low</b>                                                                                                                                                                          |            |
| Bias due to missing outcome data                   | 3.1 Were data for this outcome available for all, or nearly all, participants randomized?                                                                                           | Y          |
|                                                    | 3.2 If N/PN/NI to 3.1: Is there evidence that result was not biased by missing outcome data?                                                                                        | NA         |
|                                                    | 3.3 If N/PN to 3.2: Could missingness in the outcome depend on its true value?                                                                                                      | NA         |
|                                                    | 3.4 If Y/PY/NI to 3.3: Is it likely that missingness in the outcome depended on its true value?                                                                                     | NA         |
|                                                    | <b>Risk of bias judgement</b>                                                                                                                                                       | <b>Low</b> |
| Bias in measurement of the outcome                 | 4.1 Was the method of measuring the outcome inappropriate?                                                                                                                          | PN         |
|                                                    | 4.2 Could measurement or ascertainment of the outcome have differed between intervention groups?                                                                                    | PN         |
|                                                    | 4.3 Were outcome assessors aware of the intervention received by study participants?                                                                                                | PN         |
|                                                    | 4.4 If Y/PY/NI to 4.3: Could assessment of the outcome have been influenced by knowledge of intervention received?                                                                  | NA         |
|                                                    | 4.5 If Y/PY/NI to 4.4: Is it likely that assessment of the outcome was influenced by knowledge of intervention received?                                                            | NA         |
|                                                    | <b>Risk of bias judgement</b>                                                                                                                                                       | <b>Low</b> |
| Bias in selection of the reported result           | 5.1 Were the data that produced this result analysed in accordance with a pre-specified analysis plan that was finalized before unblinded outcome data were available for analysis? | PY         |
|                                                    | 5.2 ... multiple eligible outcome measurements (e.g. scales, definitions, time points) within the outcome domain?                                                                   | PN         |
|                                                    | 5.3 ... multiple eligible analyses of the data?                                                                                                                                     | PN         |
|                                                    | <b>Risk of bias judgement</b>                                                                                                                                                       | <b>Low</b> |
| Overall bias                                       | <b>Risk of bias judgement</b>                                                                                                                                                       | <b>Low</b> |



| Study                                                     | Kuvacic 2018                                                                                                                                                                        |                      |
|-----------------------------------------------------------|-------------------------------------------------------------------------------------------------------------------------------------------------------------------------------------|----------------------|
| Domain                                                    | Signalling question                                                                                                                                                                 | Response             |
| <b>Bias arising from the randomization process</b>        | 1.1 Was the allocation sequence random?                                                                                                                                             | Y                    |
|                                                           | 1.2 Was the allocation sequence concealed until participants were enrolled and assigned to interventions?                                                                           | PY                   |
|                                                           | 1.3 Did baseline differences between intervention groups suggest a problem with the randomization process?                                                                          | PY                   |
|                                                           | <b>Risk of bias judgement</b>                                                                                                                                                       | <b>Some concerns</b> |
| <b>Bias due to deviations from intended interventions</b> | 2.1. Were participants aware of their assigned intervention during the trial?                                                                                                       | PY                   |
|                                                           | 2.2. Were carers and people delivering the interventions aware of participants' assigned intervention during the trial?                                                             | PY                   |
|                                                           | 2.3. If Y/PY/NI to 2.1 or 2.2: Were there deviations from the intended intervention that arose because of the experimental context?                                                 | PY                   |
|                                                           | 2.4 If Y/PY to 2.3: Were these deviations likely to have affected the outcome?                                                                                                      | PN                   |
|                                                           | 2.5. If Y/PY/NI to 2.4: Were these deviations from intended intervention balanced between groups?                                                                                   | NA                   |
|                                                           | 2.6 Was an appropriate analysis used to estimate the effect of assignment to intervention?                                                                                          | PY                   |
|                                                           | 2.7 If N/PN/NI to 2.6: Was there potential for a substantial impact (on the result) of the failure to analyse participants in the group to which they were randomized?              | NA                   |
| <b>Risk of bias judgement</b>                             | <b>Some concerns</b>                                                                                                                                                                |                      |
| <b>Bias due to missing outcome data</b>                   | 3.1 Were data for this outcome available for all, or nearly all, participants randomized?                                                                                           | PY                   |
|                                                           | 3.2 If N/PN/NI to 3.1: Is there evidence that result was not biased by missing outcome data?                                                                                        | NA                   |
|                                                           | 3.3 If N/PN to 3.2: Could missingness in the outcome depend on its true value?                                                                                                      | NA                   |
|                                                           | 3.4 If Y/PY/NI to 3.3: Is it likely that missingness in the outcome depended on its true value?                                                                                     | NA                   |
|                                                           | <b>Risk of bias judgement</b>                                                                                                                                                       | <b>Low</b>           |
| <b>Bias in measurement of the outcome</b>                 | 4.1 Was the method of measuring the outcome inappropriate?                                                                                                                          | PN                   |
|                                                           | 4.2 Could measurement or ascertainment of the outcome have differed between intervention groups?                                                                                    | PN                   |
|                                                           | 4.3 Were outcome assessors aware of the intervention received by study participants?                                                                                                | PY                   |
|                                                           | 4.4 If Y/PY/NI to 4.3: Could assessment of the outcome have been influenced by knowledge of intervention received?                                                                  | PN                   |
|                                                           | 4.5 If Y/PY/NI to 4.4: Is it likely that assessment of the outcome was influenced by knowledge of intervention received?                                                            | NA                   |
|                                                           | <b>Risk of bias judgement</b>                                                                                                                                                       | <b>Low</b>           |
| <b>Bias in selection of the reported result</b>           | 5.1 Were the data that produced this result analysed in accordance with a pre-specified analysis plan that was finalized before unblinded outcome data were available for analysis? | PY                   |
|                                                           | 5.2 ... multiple eligible outcome measurements (e.g. scales, definitions, time points) within the outcome domain?                                                                   | NI                   |
|                                                           | 5.3 ... multiple eligible analyses of the data?                                                                                                                                     | NI                   |
|                                                           | <b>Risk of bias judgement</b>                                                                                                                                                       | <b>Some concerns</b> |
| <b>Overall bias</b>                                       | <b>Risk of bias judgement</b>                                                                                                                                                       | <b>Some concerns</b> |

| Study                                                     | Hohmann 2018                                                                                                                                                                        |                      |
|-----------------------------------------------------------|-------------------------------------------------------------------------------------------------------------------------------------------------------------------------------------|----------------------|
| Domain                                                    | Signalling question                                                                                                                                                                 | Response             |
| <b>Bias arising from the randomization process</b>        | 1.1 Was the allocation sequence random?                                                                                                                                             | Y                    |
|                                                           | 1.2 Was the allocation sequence concealed until participants were enrolled and assigned to interventions?                                                                           | PY                   |
|                                                           | 1.3 Did baseline differences between intervention groups suggest a problem with the randomization process?                                                                          | PY                   |
|                                                           | <b>Risk of bias judgement</b>                                                                                                                                                       | <b>Some concerns</b> |
| <b>Bias due to deviations from intended interventions</b> | 2.1. Were participants aware of their assigned intervention during the trial?                                                                                                       | Y                    |
|                                                           | 2.2. Were carers and people delivering the interventions aware of participants' assigned intervention during the trial?                                                             | Y                    |
|                                                           | 2.3. If Y/PY/NI to 2.1 or 2.2: Were there deviations from the intended intervention that arose because of the experimental context?                                                 | PY                   |
|                                                           | 2.4 If Y/PY to 2.3: Were these deviations likely to have affected the outcome?                                                                                                      | PN                   |
|                                                           | 2.5. If Y/PY/NI to 2.4: Were these deviations from intended intervention balanced between groups?                                                                                   | NA                   |
|                                                           | 2.6 Was an appropriate analysis used to estimate the effect of assignment to intervention?                                                                                          | PN                   |
|                                                           | 2.7 If N/PN/NI to 2.6: Was there potential for a substantial impact (on the result) of the failure to analyse participants in the group to which they were randomized?              | PY                   |
| <b>Risk of bias judgement</b>                             | <b>High</b>                                                                                                                                                                         |                      |
| <b>Bias due to missing outcome data</b>                   | 3.1 Were data for this outcome available for all, or nearly all, participants randomized?                                                                                           | PN                   |
|                                                           | 3.2 If N/PN/NI to 3.1: Is there evidence that result was not biased by missing outcome data?                                                                                        | PN                   |
|                                                           | 3.3 If N/PN to 3.2: Could missingness in the outcome depend on its true value?                                                                                                      | PY                   |
|                                                           | 3.4 If Y/PY/NI to 3.3: Is it likely that missingness in the outcome depended on its true value?                                                                                     | NI                   |
|                                                           | <b>Risk of bias judgement</b>                                                                                                                                                       | <b>High</b>          |
| <b>Bias in measurement of the outcome</b>                 | 4.1 Was the method of measuring the outcome inappropriate?                                                                                                                          | PN                   |
|                                                           | 4.2 Could measurement or ascertainment of the outcome have differed between intervention groups?                                                                                    | PN                   |
|                                                           | 4.3 Were outcome assessors aware of the intervention received by study participants?                                                                                                | Y                    |
|                                                           | 4.4 If Y/PY/NI to 4.3: Could assessment of the outcome have been influenced by knowledge of intervention received?                                                                  | PY                   |
|                                                           | 4.5 If Y/PY/NI to 4.4: Is it likely that assessment of the outcome was influenced by knowledge of intervention received?                                                            | PN                   |
|                                                           | <b>Risk of bias judgement</b>                                                                                                                                                       | <b>Some concerns</b> |
| <b>Bias in selection of the reported result</b>           | 5.1 Were the data that produced this result analysed in accordance with a pre-specified analysis plan that was finalized before unblinded outcome data were available for analysis? | PY                   |
|                                                           | 5.2 ... multiple eligible outcome measurements (e.g. scales, definitions, time points) within the outcome domain?                                                                   | PY                   |
|                                                           | 5.3 ... multiple eligible analyses of the data?                                                                                                                                     | PY                   |
|                                                           | <b>Risk of bias judgement</b>                                                                                                                                                       | <b>High</b>          |
| <b>Overall bias</b>                                       | <b>Risk of bias judgement</b>                                                                                                                                                       | <b>High</b>          |

| Study                                                     | Glombiewski 2018                                                                                                                                                                    |                      |
|-----------------------------------------------------------|-------------------------------------------------------------------------------------------------------------------------------------------------------------------------------------|----------------------|
| Domain                                                    | Signalling question                                                                                                                                                                 | Response             |
| <b>Bias arising from the randomization process</b>        | 1.1 Was the allocation sequence random?                                                                                                                                             | Y                    |
|                                                           | 1.2 Was the allocation sequence concealed until participants were enrolled and assigned to interventions?                                                                           | PY                   |
|                                                           | 1.3 Did baseline differences between intervention groups suggest a problem with the randomization process?                                                                          | PY                   |
|                                                           | <b>Risk of bias judgement</b>                                                                                                                                                       | <b>Some concerns</b> |
| <b>Bias due to deviations from intended interventions</b> | 2.1. Were participants aware of their assigned intervention during the trial?                                                                                                       | Y                    |
|                                                           | 2.2. Were carers and people delivering the interventions aware of participants' assigned intervention during the trial?                                                             | PN                   |
|                                                           | 2.3. If Y/PY/NI to 2.1 or 2.2: Were there deviations from the intended intervention that arose because of the experimental context?                                                 | NI                   |
|                                                           | 2.4 If Y/PY to 2.3: Were these deviations likely to have affected the outcome?                                                                                                      | NA                   |
|                                                           | 2.5. If Y/PY/NI to 2.4: Were these deviations from intended intervention balanced between groups?                                                                                   | NA                   |
|                                                           | 2.6 Was an appropriate analysis used to estimate the effect of assignment to intervention?                                                                                          | PY                   |
|                                                           | 2.7 If N/PN/NI to 2.6: Was there potential for a substantial impact (on the result) of the failure to analyse participants in the group to which they were randomized?              | NA                   |
| <b>Risk of bias judgement</b>                             | <b>Some concerns</b>                                                                                                                                                                |                      |
| <b>Bias due to missing outcome data</b>                   | 3.1 Were data for this outcome available for all, or nearly all, participants randomized?                                                                                           | PY                   |
|                                                           | 3.2 If N/PN/NI to 3.1: Is there evidence that result was not biased by missing outcome data?                                                                                        | NA                   |
|                                                           | 3.3 If N/PN to 3.2: Could missingness in the outcome depend on its true value?                                                                                                      | NA                   |
|                                                           | 3.4 If Y/PY/NI to 3.3: Is it likely that missingness in the outcome depended on its true value?                                                                                     | NA                   |
|                                                           | <b>Risk of bias judgement</b>                                                                                                                                                       | <b>Low</b>           |
| <b>Bias in measurement of the outcome</b>                 | 4.1 Was the method of measuring the outcome inappropriate?                                                                                                                          | PN                   |
|                                                           | 4.2 Could measurement or ascertainment of the outcome have differed between intervention groups?                                                                                    | PN                   |
|                                                           | 4.3 Were outcome assessors aware of the intervention received by study participants?                                                                                                | PN                   |
|                                                           | 4.4 If Y/PY/NI to 4.3: Could assessment of the outcome have been influenced by knowledge of intervention received?                                                                  | NA                   |
|                                                           | 4.5 If Y/PY/NI to 4.4: Is it likely that assessment of the outcome was influenced by knowledge of intervention received?                                                            | NA                   |
|                                                           | <b>Risk of bias judgement</b>                                                                                                                                                       | <b>Low</b>           |
| <b>Bias in selection of the reported result</b>           | 5.1 Were the data that produced this result analysed in accordance with a pre-specified analysis plan that was finalized before unblinded outcome data were available for analysis? | PY                   |
|                                                           | 5.2 ... multiple eligible outcome measurements (e.g. scales, definitions, time points) within the outcome domain?                                                                   | NI                   |
|                                                           | 5.3 ... multiple eligible analyses of the data?                                                                                                                                     | NI                   |
|                                                           | <b>Risk of bias judgement</b>                                                                                                                                                       | <b>Some concerns</b> |
| <b>Overall bias</b>                                       | <b>Risk of bias judgement</b>                                                                                                                                                       | <b>Some concerns</b> |

| Study                                                     | Tüzün 2017                                                                                                                                                                          |                      |
|-----------------------------------------------------------|-------------------------------------------------------------------------------------------------------------------------------------------------------------------------------------|----------------------|
| Domain                                                    | Signalling question                                                                                                                                                                 | Response             |
| <b>Bias arising from the randomization process</b>        | 1.1 Was the allocation sequence random?                                                                                                                                             | Y                    |
|                                                           | 1.2 Was the allocation sequence concealed until participants were enrolled and assigned to interventions?                                                                           | PY                   |
|                                                           | 1.3 Did baseline differences between intervention groups suggest a problem with the randomization process?                                                                          | PY                   |
|                                                           | <b>Risk of bias judgement</b>                                                                                                                                                       | <b>Some concerns</b> |
| <b>Bias due to deviations from intended interventions</b> | 2.1. Were participants aware of their assigned intervention during the trial?                                                                                                       | PY                   |
|                                                           | 2.2. Were carers and people delivering the interventions aware of participants' assigned intervention during the trial?                                                             | PN                   |
|                                                           | 2.3. If Y/PY/NI to 2.1 or 2.2: Were there deviations from the intended intervention that arose because of the experimental context?                                                 | PN                   |
|                                                           | 2.4 If Y/PY to 2.3: Were these deviations likely to have affected the outcome?                                                                                                      | NA                   |
|                                                           | 2.5. If Y/PY/NI to 2.4: Were these deviations from intended intervention balanced between groups?                                                                                   | NA                   |
|                                                           | 2.6 Was an appropriate analysis used to estimate the effect of assignment to intervention?                                                                                          | PY                   |
|                                                           | 2.7 If N/PN/NI to 2.6: Was there potential for a substantial impact (on the result) of the failure to analyse participants in the group to which they were randomized?              | NA                   |
|                                                           | <b>Risk of bias judgement</b>                                                                                                                                                       | <b>Low</b>           |
| <b>Bias due to missing outcome data</b>                   | 3.1 Were data for this outcome available for all, or nearly all, participants randomized?                                                                                           | Y                    |
|                                                           | 3.2 If N/PN/NI to 3.1: Is there evidence that result was not biased by missing outcome data?                                                                                        | NA                   |
|                                                           | 3.3 If N/PN to 3.2: Could missingness in the outcome depend on its true value?                                                                                                      | NA                   |
|                                                           | 3.4 If Y/PY/NI to 3.3: Is it likely that missingness in the outcome depended on its true value?                                                                                     | NA                   |
|                                                           | <b>Risk of bias judgement</b>                                                                                                                                                       | <b>Low</b>           |
| <b>Bias in measurement of the outcome</b>                 | 4.1 Was the method of measuring the outcome inappropriate?                                                                                                                          | PN                   |
|                                                           | 4.2 Could measurement or ascertainment of the outcome have differed between intervention groups?                                                                                    | PN                   |
|                                                           | 4.3 Were outcome assessors aware of the intervention received by study participants?                                                                                                | PY                   |
|                                                           | 4.4 If Y/PY/NI to 4.3: Could assessment of the outcome have been influenced by knowledge of intervention received?                                                                  | PN                   |
|                                                           | 4.5 If Y/PY/NI to 4.4: Is it likely that assessment of the outcome was influenced by knowledge of intervention received?                                                            | NA                   |
|                                                           | <b>Risk of bias judgement</b>                                                                                                                                                       | <b>Low</b>           |
| <b>Bias in selection of the reported result</b>           | 5.1 Were the data that produced this result analysed in accordance with a pre-specified analysis plan that was finalized before unblinded outcome data were available for analysis? | PY                   |
|                                                           | 5.2 ... multiple eligible outcome measurements (e.g. scales, definitions, time points) within the outcome domain?                                                                   | NI                   |
|                                                           | 5.3 ... multiple eligible analyses of the data?                                                                                                                                     | NI                   |
|                                                           | <b>Risk of bias judgement</b>                                                                                                                                                       | <b>Some concerns</b> |
| <b>Overall bias</b>                                       | <b>Risk of bias judgement</b>                                                                                                                                                       | <b>Some concerns</b> |

| Study                                              | Seo 2017                                                                                                                                                                            |            |
|----------------------------------------------------|-------------------------------------------------------------------------------------------------------------------------------------------------------------------------------------|------------|
| Domain                                             | Signalling question                                                                                                                                                                 | Response   |
| Bias arising from the randomization process        | 1.1 Was the allocation sequence random?                                                                                                                                             | Y          |
|                                                    | 1.2 Was the allocation sequence concealed until participants were enrolled and assigned to interventions?                                                                           | PY         |
|                                                    | 1.3 Did baseline differences between intervention groups suggest a problem with the randomization process?                                                                          | PN         |
|                                                    | <b>Risk of bias judgement</b>                                                                                                                                                       | <b>Low</b> |
| Bias due to deviations from intended interventions | 2.1. Were participants aware of their assigned intervention during the trial?                                                                                                       | PY         |
|                                                    | 2.2. Were carers and people delivering the interventions aware of participants' assigned intervention during the trial?                                                             | PN         |
|                                                    | 2.3. If Y/PY/NI to 2.1 or 2.2: Were there deviations from the intended intervention that arose because of the experimental context?                                                 | PN         |
|                                                    | 2.4 If Y/PY to 2.3: Were these deviations likely to have affected the outcome?                                                                                                      | NA         |
|                                                    | 2.5. If Y/PY/NI to 2.4: Were these deviations from intended intervention balanced between groups?                                                                                   | NA         |
|                                                    | 2.6 Was an appropriate analysis used to estimate the effect of assignment to intervention?                                                                                          | Y          |
|                                                    | 2.7 If N/PN/NI to 2.6: Was there potential for a substantial impact (on the result) of the failure to analyse participants in the group to which they were randomized?              | NA         |
| <b>Risk of bias judgement</b>                      | <b>Low</b>                                                                                                                                                                          |            |
| Bias due to missing outcome data                   | 3.1 Were data for this outcome available for all, or nearly all, participants randomized?                                                                                           | PY         |
|                                                    | 3.2 If N/PN/NI to 3.1: Is there evidence that result was not biased by missing outcome data?                                                                                        | NA         |
|                                                    | 3.3 If N/PN to 3.2: Could missingness in the outcome depend on its true value?                                                                                                      | NA         |
|                                                    | 3.4 If Y/PY/NI to 3.3: Is it likely that missingness in the outcome depended on its true value?                                                                                     | NA         |
|                                                    | <b>Risk of bias judgement</b>                                                                                                                                                       | <b>Low</b> |
| Bias in measurement of the outcome                 | 4.1 Was the method of measuring the outcome inappropriate?                                                                                                                          | PN         |
|                                                    | 4.2 Could measurement or ascertainment of the outcome have differed between intervention groups?                                                                                    | PN         |
|                                                    | 4.3 Were outcome assessors aware of the intervention received by study participants?                                                                                                | PN         |
|                                                    | 4.4 If Y/PY/NI to 4.3: Could assessment of the outcome have been influenced by knowledge of intervention received?                                                                  | NA         |
|                                                    | 4.5 If Y/PY/NI to 4.4: Is it likely that assessment of the outcome was influenced by knowledge of intervention received?                                                            | NA         |
|                                                    | <b>Risk of bias judgement</b>                                                                                                                                                       | <b>Low</b> |
| Bias in selection of the reported result           | 5.1 Were the data that produced this result analysed in accordance with a pre-specified analysis plan that was finalized before unblinded outcome data were available for analysis? | PY         |
|                                                    | 5.2 ... multiple eligible outcome measurements (e.g. scales, definitions, time points) within the outcome domain?                                                                   | PN         |
|                                                    | 5.3 ... multiple eligible analyses of the data?                                                                                                                                     | PN         |
|                                                    | <b>Risk of bias judgement</b>                                                                                                                                                       | <b>Low</b> |
| Overall bias                                       | <b>Risk of bias judgement</b>                                                                                                                                                       | <b>Low</b> |

| Study                                                     | Nayback-Beebe 2017                                                                                                                                                                  |                      |
|-----------------------------------------------------------|-------------------------------------------------------------------------------------------------------------------------------------------------------------------------------------|----------------------|
| Domain                                                    | Signalling question                                                                                                                                                                 | Response             |
| <b>Bias arising from the randomization process</b>        | 1.1 Was the allocation sequence random?                                                                                                                                             | Y                    |
|                                                           | 1.2 Was the allocation sequence concealed until participants were enrolled and assigned to interventions?                                                                           | PY                   |
|                                                           | 1.3 Did baseline differences between intervention groups suggest a problem with the randomization process?                                                                          | PY                   |
|                                                           | <b>Risk of bias judgement</b>                                                                                                                                                       | <b>Some concerns</b> |
| <b>Bias due to deviations from intended interventions</b> | 2.1. Were participants aware of their assigned intervention during the trial?                                                                                                       | Y                    |
|                                                           | 2.2. Were carers and people delivering the interventions aware of participants' assigned intervention during the trial?                                                             | Y                    |
|                                                           | 2.3. If Y/PY/NI to 2.1 or 2.2: Were there deviations from the intended intervention that arose because of the experimental context?                                                 | PY                   |
|                                                           | 2.4 If Y/PY to 2.3: Were these deviations likely to have affected the outcome?                                                                                                      | PY                   |
|                                                           | 2.5. If Y/PY/NI to 2.4: Were these deviations from intended intervention balanced between groups?                                                                                   | PY                   |
|                                                           | 2.6 Was an appropriate analysis used to estimate the effect of assignment to intervention?                                                                                          | PY                   |
|                                                           | 2.7 If N/PN/NI to 2.6: Was there potential for a substantial impact (on the result) of the failure to analyse participants in the group to which they were randomized?              | NA                   |
| <b>Risk of bias judgement</b>                             | <b>Some concerns</b>                                                                                                                                                                |                      |
| <b>Bias due to missing outcome data</b>                   | 3.1 Were data for this outcome available for all, or nearly all, participants randomized?                                                                                           | NI                   |
|                                                           | 3.2 If N/PN/NI to 3.1: Is there evidence that result was not biased by missing outcome data?                                                                                        | PY                   |
|                                                           | 3.3 If N/PN to 3.2: Could missingness in the outcome depend on its true value?                                                                                                      | NA                   |
|                                                           | 3.4 If Y/PY/NI to 3.3: Is it likely that missingness in the outcome depended on its true value?                                                                                     | NA                   |
|                                                           | <b>Risk of bias judgement</b>                                                                                                                                                       | <b>Low</b>           |
| <b>Bias in measurement of the outcome</b>                 | 4.1 Was the method of measuring the outcome inappropriate?                                                                                                                          | PN                   |
|                                                           | 4.2 Could measurement or ascertainment of the outcome have differed between intervention groups?                                                                                    | PN                   |
|                                                           | 4.3 Were outcome assessors aware of the intervention received by study participants?                                                                                                | Y                    |
|                                                           | 4.4 If Y/PY/NI to 4.3: Could assessment of the outcome have been influenced by knowledge of intervention received?                                                                  | PY                   |
|                                                           | 4.5 If Y/PY/NI to 4.4: Is it likely that assessment of the outcome was influenced by knowledge of intervention received?                                                            | PY                   |
|                                                           | <b>Risk of bias judgement</b>                                                                                                                                                       | <b>High</b>          |
| <b>Bias in selection of the reported result</b>           | 5.1 Were the data that produced this result analysed in accordance with a pre-specified analysis plan that was finalized before unblinded outcome data were available for analysis? | PY                   |
|                                                           | 5.2 ... multiple eligible outcome measurements (e.g. scales, definitions, time points) within the outcome domain?                                                                   | NI                   |
|                                                           | 5.3 ... multiple eligible analyses of the data?                                                                                                                                     | NI                   |
|                                                           | <b>Risk of bias judgement</b>                                                                                                                                                       | <b>Some concerns</b> |
| <b>Overall bias</b>                                       | <b>Risk of bias judgement</b>                                                                                                                                                       | <b>High</b>          |

| Study                                              | Kumar 2017                                                                                                                                                                          |                      |
|----------------------------------------------------|-------------------------------------------------------------------------------------------------------------------------------------------------------------------------------------|----------------------|
| Domain                                             | Signalling question                                                                                                                                                                 | Response             |
| Bias arising from the randomization process        | 1.1 Was the allocation sequence random?                                                                                                                                             | Y                    |
|                                                    | 1.2 Was the allocation sequence concealed until participants were enrolled and assigned to interventions?                                                                           | PY                   |
|                                                    | 1.3 Did baseline differences between intervention groups suggest a problem with the randomization process?                                                                          | PN                   |
|                                                    | <b>Risk of bias judgement</b>                                                                                                                                                       | <b>Low</b>           |
| Bias due to deviations from intended interventions | 2.1. Were participants aware of their assigned intervention during the trial?                                                                                                       | PY                   |
|                                                    | 2.2. Were carers and people delivering the interventions aware of participants' assigned intervention during the trial?                                                             | PY                   |
|                                                    | 2.3. If Y/PY/NI to 2.1 or 2.2: Were there deviations from the intended intervention that arose because of the experimental context?                                                 | PN                   |
|                                                    | 2.4 If Y/PY to 2.3: Were these deviations likely to have affected the outcome?                                                                                                      | NA                   |
|                                                    | 2.5. If Y/PY/NI to 2.4: Were these deviations from intended intervention balanced between groups?                                                                                   | NA                   |
|                                                    | 2.6 Was an appropriate analysis used to estimate the effect of assignment to intervention?                                                                                          | PY                   |
|                                                    | 2.7 If N/PN/NI to 2.6: Was there potential for a substantial impact (on the result) of the failure to analyse participants in the group to which they were randomized?              | NA                   |
| <b>Risk of bias judgement</b>                      | <b>Low</b>                                                                                                                                                                          |                      |
| Bias due to missing outcome data                   | 3.1 Were data for this outcome available for all, or nearly all, participants randomized?                                                                                           | PN                   |
|                                                    | 3.2 If N/PN/NI to 3.1: Is there evidence that result was not biased by missing outcome data?                                                                                        | PY                   |
|                                                    | 3.3 If N/PN to 3.2: Could missingness in the outcome depend on its true value?                                                                                                      | NA                   |
|                                                    | 3.4 If Y/PY/NI to 3.3: Is it likely that missingness in the outcome depended on its true value?                                                                                     | NA                   |
|                                                    | <b>Risk of bias judgement</b>                                                                                                                                                       | <b>Low</b>           |
| Bias in measurement of the outcome                 | 4.1 Was the method of measuring the outcome inappropriate?                                                                                                                          | PN                   |
|                                                    | 4.2 Could measurement or ascertainment of the outcome have differed between intervention groups?                                                                                    | PN                   |
|                                                    | 4.3 Were outcome assessors aware of the intervention received by study participants?                                                                                                | PY                   |
|                                                    | 4.4 If Y/PY/NI to 4.3: Could assessment of the outcome have been influenced by knowledge of intervention received?                                                                  | PY                   |
|                                                    | 4.5 If Y/PY/NI to 4.4: Is it likely that assessment of the outcome was influenced by knowledge of intervention received?                                                            | PN                   |
|                                                    | <b>Risk of bias judgement</b>                                                                                                                                                       | <b>Some concerns</b> |
| Bias in selection of the reported result           | 5.1 Were the data that produced this result analysed in accordance with a pre-specified analysis plan that was finalized before unblinded outcome data were available for analysis? | PY                   |
|                                                    | 5.2 ... multiple eligible outcome measurements (e.g. scales, definitions, time points) within the outcome domain?                                                                   | NI                   |
|                                                    | 5.3 ... multiple eligible analyses of the data?                                                                                                                                     | NI                   |
|                                                    | <b>Risk of bias judgement</b>                                                                                                                                                       | <b>Some concerns</b> |
| Overall bias                                       | <b>Risk of bias judgement</b>                                                                                                                                                       | <b>Some concerns</b> |

| Study                                                     | Harris 2017                                                                                                                                                                         |                      |
|-----------------------------------------------------------|-------------------------------------------------------------------------------------------------------------------------------------------------------------------------------------|----------------------|
| Domain                                                    | Signalling question                                                                                                                                                                 | Response             |
| <b>Bias arising from the randomization process</b>        | 1.1 Was the allocation sequence random?                                                                                                                                             | Y                    |
|                                                           | 1.2 Was the allocation sequence concealed until participants were enrolled and assigned to interventions?                                                                           | PY                   |
|                                                           | 1.3 Did baseline differences between intervention groups suggest a problem with the randomization process?                                                                          | PN                   |
|                                                           | <b>Risk of bias judgement</b>                                                                                                                                                       | <b>Low</b>           |
| <b>Bias due to deviations from intended interventions</b> | 2.1. Were participants aware of their assigned intervention during the trial?                                                                                                       | PY                   |
|                                                           | 2.2. Were carers and people delivering the interventions aware of participants' assigned intervention during the trial?                                                             | PN                   |
|                                                           | 2.3. If Y/PY/NI to 2.1 or 2.2: Were there deviations from the intended intervention that arose because of the experimental context?                                                 | PY                   |
|                                                           | 2.4 If Y/PY to 2.3: Were these deviations likely to have affected the outcome?                                                                                                      | PN                   |
|                                                           | 2.5. If Y/PY/NI to 2.4: Were these deviations from intended intervention balanced between groups?                                                                                   | NA                   |
|                                                           | 2.6 Was an appropriate analysis used to estimate the effect of assignment to intervention?                                                                                          | PY                   |
|                                                           | 2.7 If N/PN/NI to 2.6: Was there potential for a substantial impact (on the result) of the failure to analyse participants in the group to which they were randomized?              | NA                   |
| <b>Risk of bias judgement</b>                             | <b>Some concerns</b>                                                                                                                                                                |                      |
| <b>Bias due to missing outcome data</b>                   | 3.1 Were data for this outcome available for all, or nearly all, participants randomized?                                                                                           | PN                   |
|                                                           | 3.2 If N/PN/NI to 3.1: Is there evidence that result was not biased by missing outcome data?                                                                                        | PN                   |
|                                                           | 3.3 If N/PN to 3.2: Could missingness in the outcome depend on its true value?                                                                                                      | PY                   |
|                                                           | 3.4 If Y/PY/NI to 3.3: Is it likely that missingness in the outcome depended on its true value?                                                                                     | PN                   |
|                                                           | <b>Risk of bias judgement</b>                                                                                                                                                       | <b>Some concerns</b> |
| <b>Bias in measurement of the outcome</b>                 | 4.1 Was the method of measuring the outcome inappropriate?                                                                                                                          | PN                   |
|                                                           | 4.2 Could measurement or ascertainment of the outcome have differed between intervention groups?                                                                                    | PN                   |
|                                                           | 4.3 Were outcome assessors aware of the intervention received by study participants?                                                                                                | PY                   |
|                                                           | 4.4 If Y/PY/NI to 4.3: Could assessment of the outcome have been influenced by knowledge of intervention received?                                                                  | PY                   |
|                                                           | 4.5 If Y/PY/NI to 4.4: Is it likely that assessment of the outcome was influenced by knowledge of intervention received?                                                            | PY                   |
|                                                           | <b>Risk of bias judgement</b>                                                                                                                                                       | <b>High</b>          |
| <b>Bias in selection of the reported result</b>           | 5.1 Were the data that produced this result analysed in accordance with a pre-specified analysis plan that was finalized before unblinded outcome data were available for analysis? | PY                   |
|                                                           | 5.2 ... multiple eligible outcome measurements (e.g. scales, definitions, time points) within the outcome domain?                                                                   | NI                   |
|                                                           | 5.3 ... multiple eligible analyses of the data?                                                                                                                                     | NI                   |
|                                                           | <b>Risk of bias judgement</b>                                                                                                                                                       | <b>Some concerns</b> |
| <b>Overall bias</b>                                       | <b>Risk of bias judgement</b>                                                                                                                                                       | <b>High</b>          |



| Study                                                     | Michalsen 2016                                                                                                                                                                      |                      |
|-----------------------------------------------------------|-------------------------------------------------------------------------------------------------------------------------------------------------------------------------------------|----------------------|
| Domain                                                    | Signalling question                                                                                                                                                                 | Response             |
| <b>Bias arising from the randomization process</b>        | 1.1 Was the allocation sequence random?                                                                                                                                             | Y                    |
|                                                           | 1.2 Was the allocation sequence concealed until participants were enrolled and assigned to interventions?                                                                           | Y                    |
|                                                           | 1.3 Did baseline differences between intervention groups suggest a problem with the randomization process?                                                                          | PN                   |
|                                                           | <b>Risk of bias judgement</b>                                                                                                                                                       | <b>Low</b>           |
| <b>Bias due to deviations from intended interventions</b> | 2.1. Were participants aware of their assigned intervention during the trial?                                                                                                       | Y                    |
|                                                           | 2.2. Were carers and people delivering the interventions aware of participants' assigned intervention during the trial?                                                             | PY                   |
|                                                           | 2.3. If Y/PY/NI to 2.1 or 2.2: Were there deviations from the intended intervention that arose because of the experimental context?                                                 | PY                   |
|                                                           | 2.4 If Y/PY to 2.3: Were these deviations likely to have affected the outcome?                                                                                                      | PY                   |
|                                                           | 2.5. If Y/PY/NI to 2.4: Were these deviations from intended intervention balanced between groups?                                                                                   | PY                   |
|                                                           | 2.6 Was an appropriate analysis used to estimate the effect of assignment to intervention?                                                                                          | PY                   |
|                                                           | 2.7 If N/PN/NI to 2.6: Was there potential for a substantial impact (on the result) of the failure to analyse participants in the group to which they were randomized?              | NA                   |
| <b>Risk of bias judgement</b>                             | <b>Some concerns</b>                                                                                                                                                                |                      |
| <b>Bias due to missing outcome data</b>                   | 3.1 Were data for this outcome available for all, or nearly all, participants randomized?                                                                                           | PN                   |
|                                                           | 3.2 If N/PN/NI to 3.1: Is there evidence that result was not biased by missing outcome data?                                                                                        | PN                   |
|                                                           | 3.3 If N/PN to 3.2: Could missingness in the outcome depend on its true value?                                                                                                      | PY                   |
|                                                           | 3.4 If Y/PY/NI to 3.3: Is it likely that missingness in the outcome depended on its true value?                                                                                     | PN                   |
|                                                           | <b>Risk of bias judgement</b>                                                                                                                                                       | <b>Some concerns</b> |
| <b>Bias in measurement of the outcome</b>                 | 4.1 Was the method of measuring the outcome inappropriate?                                                                                                                          | PN                   |
|                                                           | 4.2 Could measurement or ascertainment of the outcome have differed between intervention groups?                                                                                    | PN                   |
|                                                           | 4.3 Were outcome assessors aware of the intervention received by study participants?                                                                                                | PY                   |
|                                                           | 4.4 If Y/PY/NI to 4.3: Could assessment of the outcome have been influenced by knowledge of intervention received?                                                                  | PY                   |
|                                                           | 4.5 If Y/PY/NI to 4.4: Is it likely that assessment of the outcome was influenced by knowledge of intervention received?                                                            | PN                   |
|                                                           | <b>Risk of bias judgement</b>                                                                                                                                                       | <b>Some concerns</b> |
| <b>Bias in selection of the reported result</b>           | 5.1 Were the data that produced this result analysed in accordance with a pre-specified analysis plan that was finalized before unblinded outcome data were available for analysis? | PY                   |
|                                                           | 5.2 ... multiple eligible outcome measurements (e.g. scales, definitions, time points) within the outcome domain?                                                                   | PN                   |
|                                                           | 5.3 ... multiple eligible analyses of the data?                                                                                                                                     | PN                   |
|                                                           | <b>Risk of bias judgement</b>                                                                                                                                                       | <b>Low</b>           |
| <b>Overall bias</b>                                       | <b>Risk of bias judgement</b>                                                                                                                                                       | <b>Some concerns</b> |

| Study                                                     | Trapp 2015                                                                                                                                                                          |                      |
|-----------------------------------------------------------|-------------------------------------------------------------------------------------------------------------------------------------------------------------------------------------|----------------------|
| Domain                                                    | Signalling question                                                                                                                                                                 | Response             |
| <b>Bias arising from the randomization process</b>        | 1.1 Was the allocation sequence random?                                                                                                                                             | Y                    |
|                                                           | 1.2 Was the allocation sequence concealed until participants were enrolled and assigned to interventions?                                                                           | PY                   |
|                                                           | 1.3 Did baseline differences between intervention groups suggest a problem with the randomization process?                                                                          | PY                   |
|                                                           | <b>Risk of bias judgement</b>                                                                                                                                                       | <b>Some concerns</b> |
| <b>Bias due to deviations from intended interventions</b> | 2.1. Were participants aware of their assigned intervention during the trial?                                                                                                       | PY                   |
|                                                           | 2.2. Were carers and people delivering the interventions aware of participants' assigned intervention during the trial?                                                             | PY                   |
|                                                           | 2.3. If Y/PY/NI to 2.1 or 2.2: Were there deviations from the intended intervention that arose because of the experimental context?                                                 | PY                   |
|                                                           | 2.4 If Y/PY to 2.3: Were these deviations likely to have affected the outcome?                                                                                                      | PY                   |
|                                                           | 2.5. If Y/PY/NI to 2.4: Were these deviations from intended intervention balanced between groups?                                                                                   | PN                   |
|                                                           | 2.6 Was an appropriate analysis used to estimate the effect of assignment to intervention?                                                                                          | PY                   |
|                                                           | 2.7 If N/PN/NI to 2.6: Was there potential for a substantial impact (on the result) of the failure to analyse participants in the group to which they were randomized?              | NA                   |
| <b>Risk of bias judgement</b>                             | <b>High</b>                                                                                                                                                                         |                      |
| <b>Bias due to missing outcome data</b>                   | 3.1 Were data for this outcome available for all, or nearly all, participants randomized?                                                                                           | PY                   |
|                                                           | 3.2 If N/PN/NI to 3.1: Is there evidence that result was not biased by missing outcome data?                                                                                        | NA                   |
|                                                           | 3.3 If N/PN to 3.2: Could missingness in the outcome depend on its true value?                                                                                                      | NA                   |
|                                                           | 3.4 If Y/PY/NI to 3.3: Is it likely that missingness in the outcome depended on its true value?                                                                                     | NA                   |
|                                                           | <b>Risk of bias judgement</b>                                                                                                                                                       | <b>Low</b>           |
| <b>Bias in measurement of the outcome</b>                 | 4.1 Was the method of measuring the outcome inappropriate?                                                                                                                          | PN                   |
|                                                           | 4.2 Could measurement or ascertainment of the outcome have differed between intervention groups?                                                                                    | PN                   |
|                                                           | 4.3 Were outcome assessors aware of the intervention received by study participants?                                                                                                | PY                   |
|                                                           | 4.4 If Y/PY/NI to 4.3: Could assessment of the outcome have been influenced by knowledge of intervention received?                                                                  | NI                   |
|                                                           | 4.5 If Y/PY/NI to 4.4: Is it likely that assessment of the outcome was influenced by knowledge of intervention received?                                                            | NI                   |
|                                                           | <b>Risk of bias judgement</b>                                                                                                                                                       | <b>High</b>          |
| <b>Bias in selection of the reported result</b>           | 5.1 Were the data that produced this result analysed in accordance with a pre-specified analysis plan that was finalized before unblinded outcome data were available for analysis? | PY                   |
|                                                           | 5.2 ... multiple eligible outcome measurements (e.g. scales, definitions, time points) within the outcome domain?                                                                   | PN                   |
|                                                           | 5.3 ... multiple eligible analyses of the data?                                                                                                                                     | PN                   |
|                                                           | <b>Risk of bias judgement</b>                                                                                                                                                       | <b>Low</b>           |
| <b>Overall bias</b>                                       | <b>Risk of bias judgement</b>                                                                                                                                                       | <b>High</b>          |

| Study                                                     | Lawand 2015                                                                                                                                                                         |            |
|-----------------------------------------------------------|-------------------------------------------------------------------------------------------------------------------------------------------------------------------------------------|------------|
| Domain                                                    | Signalling question                                                                                                                                                                 | Response   |
| <b>Bias arising from the randomization process</b>        | 1.1 Was the allocation sequence random?                                                                                                                                             | Y          |
|                                                           | 1.2 Was the allocation sequence concealed until participants were enrolled and assigned to interventions?                                                                           | PY         |
|                                                           | 1.3 Did baseline differences between intervention groups suggest a problem with the randomization process?                                                                          | PN         |
|                                                           | <b>Risk of bias judgement</b>                                                                                                                                                       | <b>Low</b> |
| <b>Bias due to deviations from intended interventions</b> | 2.1. Were participants aware of their assigned intervention during the trial?                                                                                                       | PY         |
|                                                           | 2.2. Were carers and people delivering the interventions aware of participants' assigned intervention during the trial?                                                             | PN         |
|                                                           | 2.3. If Y/PY/NI to 2.1 or 2.2: Were there deviations from the intended intervention that arose because of the experimental context?                                                 | PN         |
|                                                           | 2.4 If Y/PY to 2.3: Were these deviations likely to have affected the outcome?                                                                                                      | NA         |
|                                                           | 2.5. If Y/PY/NI to 2.4: Were these deviations from intended intervention balanced between groups?                                                                                   | NA         |
|                                                           | 2.6 Was an appropriate analysis used to estimate the effect of assignment to intervention?                                                                                          | PY         |
|                                                           | 2.7 If N/PN/NI to 2.6: Was there potential for a substantial impact (on the result) of the failure to analyse participants in the group to which they were randomized?              | NA         |
| <b>Risk of bias judgement</b>                             | <b>Low</b>                                                                                                                                                                          |            |
| <b>Bias due to missing outcome data</b>                   | 3.1 Were data for this outcome available for all, or nearly all, participants randomized?                                                                                           | PY         |
|                                                           | 3.2 If N/PN/NI to 3.1: Is there evidence that result was not biased by missing outcome data?                                                                                        | NA         |
|                                                           | 3.3 If N/PN to 3.2: Could missingness in the outcome depend on its true value?                                                                                                      | NA         |
|                                                           | 3.4 If Y/PY/NI to 3.3: Is it likely that missingness in the outcome depended on its true value?                                                                                     | NA         |
|                                                           | <b>Risk of bias judgement</b>                                                                                                                                                       | <b>Low</b> |
| <b>Bias in measurement of the outcome</b>                 | 4.1 Was the method of measuring the outcome inappropriate?                                                                                                                          | PN         |
|                                                           | 4.2 Could measurement or ascertainment of the outcome have differed between intervention groups?                                                                                    | PN         |
|                                                           | 4.3 Were outcome assessors aware of the intervention received by study participants?                                                                                                | PN         |
|                                                           | 4.4 If Y/PY/NI to 4.3: Could assessment of the outcome have been influenced by knowledge of intervention received?                                                                  | NA         |
|                                                           | 4.5 If Y/PY/NI to 4.4: Is it likely that assessment of the outcome was influenced by knowledge of intervention received?                                                            | NA         |
|                                                           | <b>Risk of bias judgement</b>                                                                                                                                                       | <b>Low</b> |
| <b>Bias in selection of the reported result</b>           | 5.1 Were the data that produced this result analysed in accordance with a pre-specified analysis plan that was finalized before unblinded outcome data were available for analysis? | PY         |
|                                                           | 5.2 ... multiple eligible outcome measurements (e.g. scales, definitions, time points) within the outcome domain?                                                                   | PN         |
|                                                           | 5.3 ... multiple eligible analyses of the data?                                                                                                                                     | PN         |
|                                                           | <b>Risk of bias judgement</b>                                                                                                                                                       | <b>Low</b> |
| <b>Overall bias</b>                                       | <b>Risk of bias judgement</b>                                                                                                                                                       | <b>Low</b> |

| Study                                                     | Kogure 2015                                                                                                                                                                         |                      |
|-----------------------------------------------------------|-------------------------------------------------------------------------------------------------------------------------------------------------------------------------------------|----------------------|
| Domain                                                    | Signalling question                                                                                                                                                                 | Response             |
| <b>Bias arising from the randomization process</b>        | 1.1 Was the allocation sequence random?                                                                                                                                             | Y                    |
|                                                           | 1.2 Was the allocation sequence concealed until participants were enrolled and assigned to interventions?                                                                           | PY                   |
|                                                           | 1.3 Did baseline differences between intervention groups suggest a problem with the randomization process?                                                                          | PN                   |
|                                                           | <b>Risk of bias judgement</b>                                                                                                                                                       | <b>Low</b>           |
| <b>Bias due to deviations from intended interventions</b> | 2.1. Were participants aware of their assigned intervention during the trial?                                                                                                       | N                    |
|                                                           | 2.2. Were carers and people delivering the interventions aware of participants' assigned intervention during the trial?                                                             | Y                    |
|                                                           | 2.3. If Y/PY/NI to 2.1 or 2.2: Were there deviations from the intended intervention that arose because of the experimental context?                                                 | PN                   |
|                                                           | 2.4 If Y/PY to 2.3: Were these deviations likely to have affected the outcome?                                                                                                      | NA                   |
|                                                           | 2.5. If Y/PY/NI to 2.4: Were these deviations from intended intervention balanced between groups?                                                                                   | NA                   |
|                                                           | 2.6 Was an appropriate analysis used to estimate the effect of assignment to intervention?                                                                                          | PY                   |
|                                                           | 2.7 If N/PN/NI to 2.6: Was there potential for a substantial impact (on the result) of the failure to analyse participants in the group to which they were randomized?              | NA                   |
| <b>Risk of bias judgement</b>                             | <b>Low</b>                                                                                                                                                                          |                      |
| <b>Bias due to missing outcome data</b>                   | 3.1 Were data for this outcome available for all, or nearly all, participants randomized?                                                                                           | PN                   |
|                                                           | 3.2 If N/PN/NI to 3.1: Is there evidence that result was not biased by missing outcome data?                                                                                        | PY                   |
|                                                           | 3.3 If N/PN to 3.2: Could missingness in the outcome depend on its true value?                                                                                                      | NA                   |
|                                                           | 3.4 If Y/PY/NI to 3.3: Is it likely that missingness in the outcome depended on its true value?                                                                                     | NA                   |
|                                                           | <b>Risk of bias judgement</b>                                                                                                                                                       | <b>Low</b>           |
| <b>Bias in measurement of the outcome</b>                 | 4.1 Was the method of measuring the outcome inappropriate?                                                                                                                          | PN                   |
|                                                           | 4.2 Could measurement or ascertainment of the outcome have differed between intervention groups?                                                                                    | PN                   |
|                                                           | 4.3 Were outcome assessors aware of the intervention received by study participants?                                                                                                | PY                   |
|                                                           | 4.4 If Y/PY/NI to 4.3: Could assessment of the outcome have been influenced by knowledge of intervention received?                                                                  | PY                   |
|                                                           | 4.5 If Y/PY/NI to 4.4: Is it likely that assessment of the outcome was influenced by knowledge of intervention received?                                                            | PN                   |
|                                                           | <b>Risk of bias judgement</b>                                                                                                                                                       | <b>Some concerns</b> |
| <b>Bias in selection of the reported result</b>           | 5.1 Were the data that produced this result analysed in accordance with a pre-specified analysis plan that was finalized before unblinded outcome data were available for analysis? | PY                   |
|                                                           | 5.2 ... multiple eligible outcome measurements (e.g. scales, definitions, time points) within the outcome domain?                                                                   | NI                   |
|                                                           | 5.3 ... multiple eligible analyses of the data?                                                                                                                                     | NI                   |
|                                                           | <b>Risk of bias judgement</b>                                                                                                                                                       | <b>Some concerns</b> |
| <b>Overall bias</b>                                       | <b>Risk of bias judgement</b>                                                                                                                                                       | <b>Some concerns</b> |

| Study                                                     | Zhang 2014                                                                                                                                                                          |             |
|-----------------------------------------------------------|-------------------------------------------------------------------------------------------------------------------------------------------------------------------------------------|-------------|
| Domain                                                    | Signalling question                                                                                                                                                                 | Response    |
| <b>Bias arising from the randomization process</b>        | 1.1 Was the allocation sequence random?                                                                                                                                             | Y           |
|                                                           | 1.2 Was the allocation sequence concealed until participants were enrolled and assigned to interventions?                                                                           | Y           |
|                                                           | 1.3 Did baseline differences between intervention groups suggest a problem with the randomization process?                                                                          | PN          |
|                                                           | <b>Risk of bias judgement</b>                                                                                                                                                       | <b>Low</b>  |
| <b>Bias due to deviations from intended interventions</b> | 2.1. Were participants aware of their assigned intervention during the trial?                                                                                                       | PY          |
|                                                           | 2.2. Were carers and people delivering the interventions aware of participants' assigned intervention during the trial?                                                             | PY          |
|                                                           | 2.3. If Y/PY/NI to 2.1 or 2.2: Were there deviations from the intended intervention that arose because of the experimental context?                                                 | PY          |
|                                                           | 2.4 If Y/PY to 2.3: Were these deviations likely to have affected the outcome?                                                                                                      | PY          |
|                                                           | 2.5. If Y/PY/NI to 2.4: Were these deviations from intended intervention balanced between groups?                                                                                   | PY          |
|                                                           | 2.6 Was an appropriate analysis used to estimate the effect of assignment to intervention?                                                                                          | PY          |
|                                                           | 2.7 If N/PN/NI to 2.6: Was there potential for a substantial impact (on the result) of the failure to analyse participants in the group to which they were randomized?              | NA          |
| <b>Risk of bias judgement</b>                             | <b>Some concerns</b>                                                                                                                                                                |             |
| <b>Bias due to missing outcome data</b>                   | 3.1 Were data for this outcome available for all, or nearly all, participants randomized?                                                                                           | PY          |
|                                                           | 3.2 If N/PN/NI to 3.1: Is there evidence that result was not biased by missing outcome data?                                                                                        | NA          |
|                                                           | 3.3 If N/PN to 3.2: Could missingness in the outcome depend on its true value?                                                                                                      | NA          |
|                                                           | 3.4 If Y/PY/NI to 3.3: Is it likely that missingness in the outcome depended on its true value?                                                                                     | NA          |
|                                                           | <b>Risk of bias judgement</b>                                                                                                                                                       | <b>Low</b>  |
| <b>Bias in measurement of the outcome</b>                 | 4.1 Was the method of measuring the outcome inappropriate?                                                                                                                          | PN          |
|                                                           | 4.2 Could measurement or ascertainment of the outcome have differed between intervention groups?                                                                                    | PN          |
|                                                           | 4.3 Were outcome assessors aware of the intervention received by study participants?                                                                                                | PY          |
|                                                           | 4.4 If Y/PY/NI to 4.3: Could assessment of the outcome have been influenced by knowledge of intervention received?                                                                  | PY          |
|                                                           | 4.5 If Y/PY/NI to 4.4: Is it likely that assessment of the outcome was influenced by knowledge of intervention received?                                                            | PY          |
|                                                           | <b>Risk of bias judgement</b>                                                                                                                                                       | <b>High</b> |
| <b>Bias in selection of the reported result</b>           | 5.1 Were the data that produced this result analysed in accordance with a pre-specified analysis plan that was finalized before unblinded outcome data were available for analysis? | PY          |
|                                                           | 5.2 ... multiple eligible outcome measurements (e.g. scales, definitions, time points) within the outcome domain?                                                                   | PY          |
|                                                           | 5.3 ... multiple eligible analyses of the data?                                                                                                                                     | PY          |
|                                                           | <b>Risk of bias judgement</b>                                                                                                                                                       | <b>High</b> |
| <b>Overall bias</b>                                       | <b>Risk of bias judgement</b>                                                                                                                                                       | <b>High</b> |

| Study                                              | Monticone 2014                                                                                                                                                                      |                      |
|----------------------------------------------------|-------------------------------------------------------------------------------------------------------------------------------------------------------------------------------------|----------------------|
| Domain                                             | Signalling question                                                                                                                                                                 | Response             |
| Bias arising from the randomization process        | 1.1 Was the allocation sequence random?                                                                                                                                             | Y                    |
|                                                    | 1.2 Was the allocation sequence concealed until participants were enrolled and assigned to interventions?                                                                           | PY                   |
|                                                    | 1.3 Did baseline differences between intervention groups suggest a problem with the randomization process?                                                                          | PN                   |
|                                                    | <b>Risk of bias judgement</b>                                                                                                                                                       | <b>Low</b>           |
| Bias due to deviations from intended interventions | 2.1. Were participants aware of their assigned intervention during the trial?                                                                                                       | Y                    |
|                                                    | 2.2. Were carers and people delivering the interventions aware of participants' assigned intervention during the trial?                                                             | Y                    |
|                                                    | 2.3. If Y/PY/NI to 2.1 or 2.2: Were there deviations from the intended intervention that arose because of the experimental context?                                                 | PY                   |
|                                                    | 2.4 If Y/PY to 2.3: Were these deviations likely to have affected the outcome?                                                                                                      | PY                   |
|                                                    | 2.5. If Y/PY/NI to 2.4: Were these deviations from intended intervention balanced between groups?                                                                                   | PY                   |
|                                                    | 2.6 Was an appropriate analysis used to estimate the effect of assignment to intervention?                                                                                          | PY                   |
|                                                    | 2.7 If N/PN/NI to 2.6: Was there potential for a substantial impact (on the result) of the failure to analyse participants in the group to which they were randomized?              | NA                   |
| <b>Risk of bias judgement</b>                      | <b>Some concerns</b>                                                                                                                                                                |                      |
| Bias due to missing outcome data                   | 3.1 Were data for this outcome available for all, or nearly all, participants randomized?                                                                                           | PY                   |
|                                                    | 3.2 If N/PN/NI to 3.1: Is there evidence that result was not biased by missing outcome data?                                                                                        | NA                   |
|                                                    | 3.3 If N/PN to 3.2: Could missingness in the outcome depend on its true value?                                                                                                      | NA                   |
|                                                    | 3.4 If Y/PY/NI to 3.3: Is it likely that missingness in the outcome depended on its true value?                                                                                     | NA                   |
|                                                    | <b>Risk of bias judgement</b>                                                                                                                                                       | <b>Low</b>           |
| Bias in measurement of the outcome                 | 4.1 Was the method of measuring the outcome inappropriate?                                                                                                                          | PN                   |
|                                                    | 4.2 Could measurement or ascertainment of the outcome have differed between intervention groups?                                                                                    | PN                   |
|                                                    | 4.3 Were outcome assessors aware of the intervention received by study participants?                                                                                                | Y                    |
|                                                    | 4.4 If Y/PY/NI to 4.3: Could assessment of the outcome have been influenced by knowledge of intervention received?                                                                  | PY                   |
|                                                    | 4.5 If Y/PY/NI to 4.4: Is it likely that assessment of the outcome was influenced by knowledge of intervention received?                                                            | PN                   |
|                                                    | <b>Risk of bias judgement</b>                                                                                                                                                       | <b>Some concerns</b> |
| Bias in selection of the reported result           | 5.1 Were the data that produced this result analysed in accordance with a pre-specified analysis plan that was finalized before unblinded outcome data were available for analysis? | Y                    |
|                                                    | 5.2 ... multiple eligible outcome measurements (e.g. scales, definitions, time points) within the outcome domain?                                                                   | NI                   |
|                                                    | 5.3 ... multiple eligible analyses of the data?                                                                                                                                     | NI                   |
|                                                    | <b>Risk of bias judgement</b>                                                                                                                                                       | <b>Some concerns</b> |
| Overall bias                                       | <b>Risk of bias judgement</b>                                                                                                                                                       | <b>Some concerns</b> |

| Study                                                     | Tekur 2012                                                                                                                                                                          |            |
|-----------------------------------------------------------|-------------------------------------------------------------------------------------------------------------------------------------------------------------------------------------|------------|
| Domain                                                    | Signalling question                                                                                                                                                                 | Response   |
| <b>Bias arising from the randomization process</b>        | 1.1 Was the allocation sequence random?                                                                                                                                             | Y          |
|                                                           | 1.2 Was the allocation sequence concealed until participants were enrolled and assigned to interventions?                                                                           | PY         |
|                                                           | 1.3 Did baseline differences between intervention groups suggest a problem with the randomization process?                                                                          | PN         |
|                                                           | <b>Risk of bias judgement</b>                                                                                                                                                       | <b>Low</b> |
| <b>Bias due to deviations from intended interventions</b> | 2.1. Were participants aware of their assigned intervention during the trial?                                                                                                       | PY         |
|                                                           | 2.2. Were carers and people delivering the interventions aware of participants' assigned intervention during the trial?                                                             | N          |
|                                                           | 2.3. If Y/PY/NI to 2.1 or 2.2: Were there deviations from the intended intervention that arose because of the experimental context?                                                 | PN         |
|                                                           | 2.4 If Y/PY to 2.3: Were these deviations likely to have affected the outcome?                                                                                                      | NA         |
|                                                           | 2.5. If Y/PY/NI to 2.4: Were these deviations from intended intervention balanced between groups?                                                                                   | NA         |
|                                                           | 2.6 Was an appropriate analysis used to estimate the effect of assignment to intervention?                                                                                          | PY         |
|                                                           | 2.7 If N/PN/NI to 2.6: Was there potential for a substantial impact (on the result) of the failure to analyse participants in the group to which they were randomized?              | NA         |
|                                                           | <b>Risk of bias judgement</b>                                                                                                                                                       | <b>Low</b> |
| <b>Bias due to missing outcome data</b>                   | 3.1 Were data for this outcome available for all, or nearly all, participants randomized?                                                                                           | Y          |
|                                                           | 3.2 If N/PN/NI to 3.1: Is there evidence that result was not biased by missing outcome data?                                                                                        | NA         |
|                                                           | 3.3 If N/PN to 3.2: Could missingness in the outcome depend on its true value?                                                                                                      | NA         |
|                                                           | 3.4 If Y/PY/NI to 3.3: Is it likely that missingness in the outcome depended on its true value?                                                                                     | NA         |
|                                                           | <b>Risk of bias judgement</b>                                                                                                                                                       | <b>Low</b> |
| <b>Bias in measurement of the outcome</b>                 | 4.1 Was the method of measuring the outcome inappropriate?                                                                                                                          | PN         |
|                                                           | 4.2 Could measurement or ascertainment of the outcome have differed between intervention groups?                                                                                    | PN         |
|                                                           | 4.3 Were outcome assessors aware of the intervention received by study participants?                                                                                                | N          |
|                                                           | 4.4 If Y/PY/NI to 4.3: Could assessment of the outcome have been influenced by knowledge of intervention received?                                                                  | NA         |
|                                                           | 4.5 If Y/PY/NI to 4.4: Is it likely that assessment of the outcome was influenced by knowledge of intervention received?                                                            | NA         |
|                                                           | <b>Risk of bias judgement</b>                                                                                                                                                       | <b>Low</b> |
| <b>Bias in selection of the reported result</b>           | 5.1 Were the data that produced this result analysed in accordance with a pre-specified analysis plan that was finalized before unblinded outcome data were available for analysis? | PY         |
|                                                           | 5.2 ... multiple eligible outcome measurements (e.g. scales, definitions, time points) within the outcome domain?                                                                   | PN         |
|                                                           | 5.3 ... multiple eligible analyses of the data?                                                                                                                                     | PN         |
|                                                           | <b>Risk of bias judgement</b>                                                                                                                                                       | <b>Low</b> |
| <b>Overall bias</b>                                       | <b>Risk of bias judgement</b>                                                                                                                                                       | <b>Low</b> |

| Study                                                     | Kader 2012                                                                                                                                                                          |                      |
|-----------------------------------------------------------|-------------------------------------------------------------------------------------------------------------------------------------------------------------------------------------|----------------------|
| Domain                                                    | Signalling question                                                                                                                                                                 | Response             |
| <b>Bias arising from the randomization process</b>        | 1.1 Was the allocation sequence random?                                                                                                                                             | Y                    |
|                                                           | 1.2 Was the allocation sequence concealed until participants were enrolled and assigned to interventions?                                                                           | PY                   |
|                                                           | 1.3 Did baseline differences between intervention groups suggest a problem with the randomization process?                                                                          | PY                   |
|                                                           | <b>Risk of bias judgement</b>                                                                                                                                                       | <b>Some concerns</b> |
| <b>Bias due to deviations from intended interventions</b> | 2.1. Were participants aware of their assigned intervention during the trial?                                                                                                       | PY                   |
|                                                           | 2.2. Were carers and people delivering the interventions aware of participants' assigned intervention during the trial?                                                             | PY                   |
|                                                           | 2.3. If Y/PY/NI to 2.1 or 2.2: Were there deviations from the intended intervention that arose because of the experimental context?                                                 | PY                   |
|                                                           | 2.4 If Y/PY to 2.3: Were these deviations likely to have affected the outcome?                                                                                                      | PY                   |
|                                                           | 2.5. If Y/PY/NI to 2.4: Were these deviations from intended intervention balanced between groups?                                                                                   | PN                   |
|                                                           | 2.6 Was an appropriate analysis used to estimate the effect of assignment to intervention?                                                                                          | PY                   |
|                                                           | 2.7 If N/PN/NI to 2.6: Was there potential for a substantial impact (on the result) of the failure to analyse participants in the group to which they were randomized?              | NA                   |
| <b>Risk of bias judgement</b>                             | <b>High</b>                                                                                                                                                                         |                      |
| <b>Bias due to missing outcome data</b>                   | 3.1 Were data for this outcome available for all, or nearly all, participants randomized?                                                                                           | PN                   |
|                                                           | 3.2 If N/PN/NI to 3.1: Is there evidence that result was not biased by missing outcome data?                                                                                        | PN                   |
|                                                           | 3.3 If N/PN to 3.2: Could missingness in the outcome depend on its true value?                                                                                                      | PY                   |
|                                                           | 3.4 If Y/PY/NI to 3.3: Is it likely that missingness in the outcome depended on its true value?                                                                                     | PN                   |
|                                                           | <b>Risk of bias judgement</b>                                                                                                                                                       | <b>Some concerns</b> |
| <b>Bias in measurement of the outcome</b>                 | 4.1 Was the method of measuring the outcome inappropriate?                                                                                                                          | PN                   |
|                                                           | 4.2 Could measurement or ascertainment of the outcome have differed between intervention groups?                                                                                    | PN                   |
|                                                           | 4.3 Were outcome assessors aware of the intervention received by study participants?                                                                                                | PY                   |
|                                                           | 4.4 If Y/PY/NI to 4.3: Could assessment of the outcome have been influenced by knowledge of intervention received?                                                                  | PY                   |
|                                                           | 4.5 If Y/PY/NI to 4.4: Is it likely that assessment of the outcome was influenced by knowledge of intervention received?                                                            | PY                   |
|                                                           | <b>Risk of bias judgement</b>                                                                                                                                                       | <b>High</b>          |
| <b>Bias in selection of the reported result</b>           | 5.1 Were the data that produced this result analysed in accordance with a pre-specified analysis plan that was finalized before unblinded outcome data were available for analysis? | PY                   |
|                                                           | 5.2 ... multiple eligible outcome measurements (e.g. scales, definitions, time points) within the outcome domain?                                                                   | NI                   |
|                                                           | 5.3 ... multiple eligible analyses of the data?                                                                                                                                     | NI                   |
|                                                           | <b>Risk of bias judgement</b>                                                                                                                                                       | <b>Some concerns</b> |
| <b>Overall bias</b>                                       | <b>Risk of bias judgement</b>                                                                                                                                                       | <b>High</b>          |



| Study                                                     | Cuesta-Vargas 2012                                                                                                                                                                  |            |
|-----------------------------------------------------------|-------------------------------------------------------------------------------------------------------------------------------------------------------------------------------------|------------|
| Domain                                                    | Signalling question                                                                                                                                                                 | Response   |
| <b>Bias arising from the randomization process</b>        | 1.1 Was the allocation sequence random?                                                                                                                                             | Y          |
|                                                           | 1.2 Was the allocation sequence concealed until participants were enrolled and assigned to interventions?                                                                           | PY         |
|                                                           | 1.3 Did baseline differences between intervention groups suggest a problem with the randomization process?                                                                          | PN         |
|                                                           | <b>Risk of bias judgement</b>                                                                                                                                                       | <b>Low</b> |
| <b>Bias due to deviations from intended interventions</b> | 2.1. Were participants aware of their assigned intervention during the trial?                                                                                                       | PY         |
|                                                           | 2.2. Were carers and people delivering the interventions aware of participants' assigned intervention during the trial?                                                             | PY         |
|                                                           | 2.3. If Y/PY/NI to 2.1 or 2.2: Were there deviations from the intended intervention that arose because of the experimental context?                                                 | PN         |
|                                                           | 2.4 If Y/PY to 2.3: Were these deviations likely to have affected the outcome?                                                                                                      | NA         |
|                                                           | 2.5. If Y/PY/NI to 2.4: Were these deviations from intended intervention balanced between groups?                                                                                   | NA         |
|                                                           | 2.6 Was an appropriate analysis used to estimate the effect of assignment to intervention?                                                                                          | PY         |
|                                                           | 2.7 If N/PN/NI to 2.6: Was there potential for a substantial impact (on the result) of the failure to analyse participants in the group to which they were randomized?              | NA         |
| <b>Risk of bias judgement</b>                             | <b>Low</b>                                                                                                                                                                          |            |
| <b>Bias due to missing outcome data</b>                   | 3.1 Were data for this outcome available for all, or nearly all, participants randomized?                                                                                           | PY         |
|                                                           | 3.2 If N/PN/NI to 3.1: Is there evidence that result was not biased by missing outcome data?                                                                                        | NA         |
|                                                           | 3.3 If N/PN to 3.2: Could missingness in the outcome depend on its true value?                                                                                                      | NA         |
|                                                           | 3.4 If Y/PY/NI to 3.3: Is it likely that missingness in the outcome depended on its true value?                                                                                     | NA         |
|                                                           | <b>Risk of bias judgement</b>                                                                                                                                                       | <b>Low</b> |
| <b>Bias in measurement of the outcome</b>                 | 4.1 Was the method of measuring the outcome inappropriate?                                                                                                                          | PN         |
|                                                           | 4.2 Could measurement or ascertainment of the outcome have differed between intervention groups?                                                                                    | PN         |
|                                                           | 4.3 Were outcome assessors aware of the intervention received by study participants?                                                                                                | PY         |
|                                                           | 4.4 If Y/PY/NI to 4.3: Could assessment of the outcome have been influenced by knowledge of intervention received?                                                                  | PN         |
|                                                           | 4.5 If Y/PY/NI to 4.4: Is it likely that assessment of the outcome was influenced by knowledge of intervention received?                                                            | NA         |
|                                                           | <b>Risk of bias judgement</b>                                                                                                                                                       | <b>Low</b> |
| <b>Bias in selection of the reported result</b>           | 5.1 Were the data that produced this result analysed in accordance with a pre-specified analysis plan that was finalized before unblinded outcome data were available for analysis? | PY         |
|                                                           | 5.2 ... multiple eligible outcome measurements (e.g. scales, definitions, time points) within the outcome domain?                                                                   | PN         |
|                                                           | 5.3 ... multiple eligible analyses of the data?                                                                                                                                     | PN         |
|                                                           | <b>Risk of bias judgement</b>                                                                                                                                                       | <b>Low</b> |
| <b>Overall bias</b>                                       | <b>Risk of bias judgement</b>                                                                                                                                                       | <b>Low</b> |

| Study                                                     | Tavafian 2011                                                                                                                                                                       |                      |
|-----------------------------------------------------------|-------------------------------------------------------------------------------------------------------------------------------------------------------------------------------------|----------------------|
| Domain                                                    | Signalling question                                                                                                                                                                 | Response             |
| <b>Bias arising from the randomization process</b>        | 1.1 Was the allocation sequence random?                                                                                                                                             | Y                    |
|                                                           | 1.2 Was the allocation sequence concealed until participants were enrolled and assigned to interventions?                                                                           | Y                    |
|                                                           | 1.3 Did baseline differences between intervention groups suggest a problem with the randomization process?                                                                          | N                    |
|                                                           | <b>Risk of bias judgement</b>                                                                                                                                                       | <b>Low</b>           |
| <b>Bias due to deviations from intended interventions</b> | 2.1. Were participants aware of their assigned intervention during the trial?                                                                                                       | Y                    |
|                                                           | 2.2. Were carers and people delivering the interventions aware of participants' assigned intervention during the trial?                                                             | N                    |
|                                                           | 2.3. If Y/PY/NI to 2.1 or 2.2: Were there deviations from the intended intervention that arose because of the experimental context?                                                 | PN                   |
|                                                           | 2.4 If Y/PY to 2.3: Were these deviations likely to have affected the outcome?                                                                                                      | NA                   |
|                                                           | 2.5. If Y/PY/NI to 2.4: Were these deviations from intended intervention balanced between groups?                                                                                   | NA                   |
|                                                           | 2.6 Was an appropriate analysis used to estimate the effect of assignment to intervention?                                                                                          | PY                   |
|                                                           | 2.7 If N/PN/NI to 2.6: Was there potential for a substantial impact (on the result) of the failure to analyse participants in the group to which they were randomized?              | NA                   |
| <b>Risk of bias judgement</b>                             | <b>Low</b>                                                                                                                                                                          |                      |
| <b>Bias due to missing outcome data</b>                   | 3.1 Were data for this outcome available for all, or nearly all, participants randomized?                                                                                           | PN                   |
|                                                           | 3.2 If N/PN/NI to 3.1: Is there evidence that result was not biased by missing outcome data?                                                                                        | PY                   |
|                                                           | 3.3 If N/PN to 3.2: Could missingness in the outcome depend on its true value?                                                                                                      | NA                   |
|                                                           | 3.4 If Y/PY/NI to 3.3: Is it likely that missingness in the outcome depended on its true value?                                                                                     | NA                   |
|                                                           | <b>Risk of bias judgement</b>                                                                                                                                                       | <b>Low</b>           |
| <b>Bias in measurement of the outcome</b>                 | 4.1 Was the method of measuring the outcome inappropriate?                                                                                                                          | PN                   |
|                                                           | 4.2 Could measurement or ascertainment of the outcome have differed between intervention groups?                                                                                    | PN                   |
|                                                           | 4.3 Were outcome assessors aware of the intervention received by study participants?                                                                                                | N                    |
|                                                           | 4.4 If Y/PY/NI to 4.3: Could assessment of the outcome have been influenced by knowledge of intervention received?                                                                  | NA                   |
|                                                           | 4.5 If Y/PY/NI to 4.4: Is it likely that assessment of the outcome was influenced by knowledge of intervention received?                                                            | NA                   |
|                                                           | <b>Risk of bias judgement</b>                                                                                                                                                       | <b>Low</b>           |
| <b>Bias in selection of the reported result</b>           | 5.1 Were the data that produced this result analysed in accordance with a pre-specified analysis plan that was finalized before unblinded outcome data were available for analysis? | PY                   |
|                                                           | 5.2 ... multiple eligible outcome measurements (e.g. scales, definitions, time points) within the outcome domain?                                                                   | NI                   |
|                                                           | 5.3 ... multiple eligible analyses of the data?                                                                                                                                     | NI                   |
|                                                           | <b>Risk of bias judgement</b>                                                                                                                                                       | <b>Some concerns</b> |
| <b>Overall bias</b>                                       | <b>Risk of bias judgement</b>                                                                                                                                                       | <b>Some concerns</b> |

| Study                                                     | Engbert 2011                                                                                                                                                                        |            |
|-----------------------------------------------------------|-------------------------------------------------------------------------------------------------------------------------------------------------------------------------------------|------------|
| Domain                                                    | Signalling question                                                                                                                                                                 | Response   |
| <b>Bias arising from the randomization process</b>        | 1.1 Was the allocation sequence random?                                                                                                                                             | Y          |
|                                                           | 1.2 Was the allocation sequence concealed until participants were enrolled and assigned to interventions?                                                                           | PY         |
|                                                           | 1.3 Did baseline differences between intervention groups suggest a problem with the randomization process?                                                                          | PN         |
|                                                           | <b>Risk of bias judgement</b>                                                                                                                                                       | <b>Low</b> |
| <b>Bias due to deviations from intended interventions</b> | 2.1. Were participants aware of their assigned intervention during the trial?                                                                                                       | PY         |
|                                                           | 2.2. Were carers and people delivering the interventions aware of participants' assigned intervention during the trial?                                                             | PN         |
|                                                           | 2.3. If Y/PY/NI to 2.1 or 2.2: Were there deviations from the intended intervention that arose because of the experimental context?                                                 | PN         |
|                                                           | 2.4 If Y/PY to 2.3: Were these deviations likely to have affected the outcome?                                                                                                      | NA         |
|                                                           | 2.5. If Y/PY/NI to 2.4: Were these deviations from intended intervention balanced between groups?                                                                                   | NA         |
|                                                           | 2.6 Was an appropriate analysis used to estimate the effect of assignment to intervention?                                                                                          | PY         |
|                                                           | 2.7 If N/PN/NI to 2.6: Was there potential for a substantial impact (on the result) of the failure to analyse participants in the group to which they were randomized?              | NA         |
| <b>Risk of bias judgement</b>                             | <b>Low</b>                                                                                                                                                                          |            |
| <b>Bias due to missing outcome data</b>                   | 3.1 Were data for this outcome available for all, or nearly all, participants randomized?                                                                                           | PN         |
|                                                           | 3.2 If N/PN/NI to 3.1: Is there evidence that result was not biased by missing outcome data?                                                                                        | PY         |
|                                                           | 3.3 If N/PN to 3.2: Could missingness in the outcome depend on its true value?                                                                                                      | NA         |
|                                                           | 3.4 If Y/PY/NI to 3.3: Is it likely that missingness in the outcome depended on its true value?                                                                                     | NA         |
|                                                           | <b>Risk of bias judgement</b>                                                                                                                                                       | <b>Low</b> |
| <b>Bias in measurement of the outcome</b>                 | 4.1 Was the method of measuring the outcome inappropriate?                                                                                                                          | PN         |
|                                                           | 4.2 Could measurement or ascertainment of the outcome have differed between intervention groups?                                                                                    | PN         |
|                                                           | 4.3 Were outcome assessors aware of the intervention received by study participants?                                                                                                | PY         |
|                                                           | 4.4 If Y/PY/NI to 4.3: Could assessment of the outcome have been influenced by knowledge of intervention received?                                                                  | PN         |
|                                                           | 4.5 If Y/PY/NI to 4.4: Is it likely that assessment of the outcome was influenced by knowledge of intervention received?                                                            | NA         |
|                                                           | <b>Risk of bias judgement</b>                                                                                                                                                       | <b>Low</b> |
| <b>Bias in selection of the reported result</b>           | 5.1 Were the data that produced this result analysed in accordance with a pre-specified analysis plan that was finalized before unblinded outcome data were available for analysis? | PY         |
|                                                           | 5.2 ... multiple eligible outcome measurements (e.g. scales, definitions, time points) within the outcome domain?                                                                   | PN         |
|                                                           | 5.3 ... multiple eligible analyses of the data?                                                                                                                                     | PN         |
|                                                           | <b>Risk of bias judgement</b>                                                                                                                                                       | <b>Low</b> |
| <b>Overall bias</b>                                       | <b>Risk of bias judgement</b>                                                                                                                                                       | <b>Low</b> |

| Study                                                     | Glombiewski 2010                                                                                                                                                                    |                      |
|-----------------------------------------------------------|-------------------------------------------------------------------------------------------------------------------------------------------------------------------------------------|----------------------|
| Domain                                                    | Signalling question                                                                                                                                                                 | Response             |
| <b>Bias arising from the randomization process</b>        | 1.1 Was the allocation sequence random?                                                                                                                                             | Y                    |
|                                                           | 1.2 Was the allocation sequence concealed until participants were enrolled and assigned to interventions?                                                                           | PY                   |
|                                                           | 1.3 Did baseline differences between intervention groups suggest a problem with the randomization process?                                                                          | PN                   |
|                                                           | <b>Risk of bias judgement</b>                                                                                                                                                       | <b>Low</b>           |
| <b>Bias due to deviations from intended interventions</b> | 2.1. Were participants aware of their assigned intervention during the trial?                                                                                                       | PY                   |
|                                                           | 2.2. Were carers and people delivering the interventions aware of participants' assigned intervention during the trial?                                                             | PY                   |
|                                                           | 2.3. If Y/PY/NI to 2.1 or 2.2: Were there deviations from the intended intervention that arose because of the experimental context?                                                 | PY                   |
|                                                           | 2.4 If Y/PY to 2.3: Were these deviations likely to have affected the outcome?                                                                                                      | PN                   |
|                                                           | 2.5. If Y/PY/NI to 2.4: Were these deviations from intended intervention balanced between groups?                                                                                   | NA                   |
|                                                           | 2.6 Was an appropriate analysis used to estimate the effect of assignment to intervention?                                                                                          | PY                   |
|                                                           | 2.7 If N/PN/NI to 2.6: Was there potential for a substantial impact (on the result) of the failure to analyse participants in the group to which they were randomized?              | NA                   |
| <b>Risk of bias judgement</b>                             | <b>Some concerns</b>                                                                                                                                                                |                      |
| <b>Bias due to missing outcome data</b>                   | 3.1 Were data for this outcome available for all, or nearly all, participants randomized?                                                                                           | PY                   |
|                                                           | 3.2 If N/PN/NI to 3.1: Is there evidence that result was not biased by missing outcome data?                                                                                        | NA                   |
|                                                           | 3.3 If N/PN to 3.2: Could missingness in the outcome depend on its true value?                                                                                                      | NA                   |
|                                                           | 3.4 If Y/PY/NI to 3.3: Is it likely that missingness in the outcome depended on its true value?                                                                                     | NA                   |
|                                                           | <b>Risk of bias judgement</b>                                                                                                                                                       | <b>Low</b>           |
| <b>Bias in measurement of the outcome</b>                 | 4.1 Was the method of measuring the outcome inappropriate?                                                                                                                          | PN                   |
|                                                           | 4.2 Could measurement or ascertainment of the outcome have differed between intervention groups?                                                                                    | PN                   |
|                                                           | 4.3 Were outcome assessors aware of the intervention received by study participants?                                                                                                | PY                   |
|                                                           | 4.4 If Y/PY/NI to 4.3: Could assessment of the outcome have been influenced by knowledge of intervention received?                                                                  | PY                   |
|                                                           | 4.5 If Y/PY/NI to 4.4: Is it likely that assessment of the outcome was influenced by knowledge of intervention received?                                                            | PN                   |
|                                                           | <b>Risk of bias judgement</b>                                                                                                                                                       | <b>Some concerns</b> |
| <b>Bias in selection of the reported result</b>           | 5.1 Were the data that produced this result analysed in accordance with a pre-specified analysis plan that was finalized before unblinded outcome data were available for analysis? | PY                   |
|                                                           | 5.2 ... multiple eligible outcome measurements (e.g. scales, definitions, time points) within the outcome domain?                                                                   | NI                   |
|                                                           | 5.3 ... multiple eligible analyses of the data?                                                                                                                                     | NI                   |
|                                                           | <b>Risk of bias judgement</b>                                                                                                                                                       | <b>Some concerns</b> |
| <b>Overall bias</b>                                       | <b>Risk of bias judgement</b>                                                                                                                                                       | <b>Some concerns</b> |

| Study                                              | Durmus 2010                                                                                                                                                                         |             |
|----------------------------------------------------|-------------------------------------------------------------------------------------------------------------------------------------------------------------------------------------|-------------|
| Domain                                             | Signalling question                                                                                                                                                                 | Response    |
| Bias arising from the randomization process        | 1.1 Was the allocation sequence random?                                                                                                                                             | PY          |
|                                                    | 1.2 Was the allocation sequence concealed until participants were enrolled and assigned to interventions?                                                                           | PY          |
|                                                    | 1.3 Did baseline differences between intervention groups suggest a problem with the randomization process?                                                                          | PN          |
|                                                    | <b>Risk of bias judgement</b>                                                                                                                                                       | <b>Low</b>  |
| Bias due to deviations from intended interventions | 2.1. Were participants aware of their assigned intervention during the trial?                                                                                                       | PY          |
|                                                    | 2.2. Were carers and people delivering the interventions aware of participants' assigned intervention during the trial?                                                             | PY          |
|                                                    | 2.3. If Y/PY/NI to 2.1 or 2.2: Were there deviations from the intended intervention that arose because of the experimental context?                                                 | PY          |
|                                                    | 2.4 If Y/PY to 2.3: Were these deviations likely to have affected the outcome?                                                                                                      | PY          |
|                                                    | 2.5. If Y/PY/NI to 2.4: Were these deviations from intended intervention balanced between groups?                                                                                   | PY          |
|                                                    | 2.6 Was an appropriate analysis used to estimate the effect of assignment to intervention?                                                                                          | PY          |
|                                                    | 2.7 If N/PN/NI to 2.6: Was there potential for a substantial impact (on the result) of the failure to analyse participants in the group to which they were randomized?              | NA          |
| <b>Risk of bias judgement</b>                      | <b>Some concerns</b>                                                                                                                                                                |             |
| Bias due to missing outcome data                   | 3.1 Were data for this outcome available for all, or nearly all, participants randomized?                                                                                           | PN          |
|                                                    | 3.2 If N/PN/NI to 3.1: Is there evidence that result was not biased by missing outcome data?                                                                                        | PN          |
|                                                    | 3.3 If N/PN to 3.2: Could missingness in the outcome depend on its true value?                                                                                                      | PN          |
|                                                    | 3.4 If Y/PY/NI to 3.3: Is it likely that missingness in the outcome depended on its true value?                                                                                     | NA          |
|                                                    | <b>Risk of bias judgement</b>                                                                                                                                                       | <b>Low</b>  |
| Bias in measurement of the outcome                 | 4.1 Was the method of measuring the outcome inappropriate?                                                                                                                          | PN          |
|                                                    | 4.2 Could measurement or ascertainment of the outcome have differed between intervention groups?                                                                                    | PN          |
|                                                    | 4.3 Were outcome assessors aware of the intervention received by study participants?                                                                                                | PY          |
|                                                    | 4.4 If Y/PY/NI to 4.3: Could assessment of the outcome have been influenced by knowledge of intervention received?                                                                  | PY          |
|                                                    | 4.5 If Y/PY/NI to 4.4: Is it likely that assessment of the outcome was influenced by knowledge of intervention received?                                                            | PY          |
|                                                    | <b>Risk of bias judgement</b>                                                                                                                                                       | <b>High</b> |
| Bias in selection of the reported result           | 5.1 Were the data that produced this result analysed in accordance with a pre-specified analysis plan that was finalized before unblinded outcome data were available for analysis? | PY          |
|                                                    | 5.2 ... multiple eligible outcome measurements (e.g. scales, definitions, time points) within the outcome domain?                                                                   | PY          |
|                                                    | 5.3 ... multiple eligible analyses of the data?                                                                                                                                     | PY          |
|                                                    | <b>Risk of bias judgement</b>                                                                                                                                                       | <b>High</b> |
| Overall bias                                       | <b>Risk of bias judgement</b>                                                                                                                                                       | <b>High</b> |

| Study                                              | Williams 2009                                                                                                                                                                       |                      |
|----------------------------------------------------|-------------------------------------------------------------------------------------------------------------------------------------------------------------------------------------|----------------------|
| Domain                                             | Signalling question                                                                                                                                                                 | Response             |
| Bias arising from the randomization process        | 1.1 Was the allocation sequence random?                                                                                                                                             | Y                    |
|                                                    | 1.2 Was the allocation sequence concealed until participants were enrolled and assigned to interventions?                                                                           | PY                   |
|                                                    | 1.3 Did baseline differences between intervention groups suggest a problem with the randomization process?                                                                          | PN                   |
|                                                    | <b>Risk of bias judgement</b>                                                                                                                                                       | <b>Low</b>           |
| Bias due to deviations from intended interventions | 2.1. Were participants aware of their assigned intervention during the trial?                                                                                                       | PY                   |
|                                                    | 2.2. Were carers and people delivering the interventions aware of participants' assigned intervention during the trial?                                                             | PY                   |
|                                                    | 2.3. If Y/PY/NI to 2.1 or 2.2: Were there deviations from the intended intervention that arose because of the experimental context?                                                 | PY                   |
|                                                    | 2.4 If Y/PY to 2.3: Were these deviations likely to have affected the outcome?                                                                                                      | PY                   |
|                                                    | 2.5. If Y/PY/NI to 2.4: Were these deviations from intended intervention balanced between groups?                                                                                   | PY                   |
|                                                    | 2.6 Was an appropriate analysis used to estimate the effect of assignment to intervention?                                                                                          | PY                   |
|                                                    | 2.7 If N/PN/NI to 2.6: Was there potential for a substantial impact (on the result) of the failure to analyse participants in the group to which they were randomized?              | NA                   |
| <b>Risk of bias judgement</b>                      | <b>Some concerns</b>                                                                                                                                                                |                      |
| Bias due to missing outcome data                   | 3.1 Were data for this outcome available for all, or nearly all, participants randomized?                                                                                           | PN                   |
|                                                    | 3.2 If N/PN/NI to 3.1: Is there evidence that result was not biased by missing outcome data?                                                                                        | PN                   |
|                                                    | 3.3 If N/PN to 3.2: Could missingness in the outcome depend on its true value?                                                                                                      | PY                   |
|                                                    | 3.4 If Y/PY/NI to 3.3: Is it likely that missingness in the outcome depended on its true value?                                                                                     | PN                   |
|                                                    | <b>Risk of bias judgement</b>                                                                                                                                                       | <b>Some concerns</b> |
| Bias in measurement of the outcome                 | 4.1 Was the method of measuring the outcome inappropriate?                                                                                                                          | PN                   |
|                                                    | 4.2 Could measurement or ascertainment of the outcome have differed between intervention groups?                                                                                    | PN                   |
|                                                    | 4.3 Were outcome assessors aware of the intervention received by study participants?                                                                                                | PY                   |
|                                                    | 4.4 If Y/PY/NI to 4.3: Could assessment of the outcome have been influenced by knowledge of intervention received?                                                                  | PY                   |
|                                                    | 4.5 If Y/PY/NI to 4.4: Is it likely that assessment of the outcome was influenced by knowledge of intervention received?                                                            | PN                   |
|                                                    | <b>Risk of bias judgement</b>                                                                                                                                                       | <b>Some concerns</b> |
| Bias in selection of the reported result           | 5.1 Were the data that produced this result analysed in accordance with a pre-specified analysis plan that was finalized before unblinded outcome data were available for analysis? | PY                   |
|                                                    | 5.2 ... multiple eligible outcome measurements (e.g. scales, definitions, time points) within the outcome domain?                                                                   | PN                   |
|                                                    | 5.3 ... multiple eligible analyses of the data?                                                                                                                                     | PN                   |
|                                                    | <b>Risk of bias judgement</b>                                                                                                                                                       | <b>Low</b>           |
| Overall bias                                       | <b>Risk of bias judgement</b>                                                                                                                                                       | <b>Some concerns</b> |

| Study                                                     | Sertpoyraz 2009                                                                                                                                                                     |                      |
|-----------------------------------------------------------|-------------------------------------------------------------------------------------------------------------------------------------------------------------------------------------|----------------------|
| Domain                                                    | Signalling question                                                                                                                                                                 | Response             |
| <b>Bias arising from the randomization process</b>        | 1.1 Was the allocation sequence random?                                                                                                                                             | PY                   |
|                                                           | 1.2 Was the allocation sequence concealed until participants were enrolled and assigned to interventions?                                                                           | PY                   |
|                                                           | 1.3 Did baseline differences between intervention groups suggest a problem with the randomization process?                                                                          | PN                   |
|                                                           | <b>Risk of bias judgement</b>                                                                                                                                                       | <b>Low</b>           |
| <b>Bias due to deviations from intended interventions</b> | 2.1. Were participants aware of their assigned intervention during the trial?                                                                                                       | PY                   |
|                                                           | 2.2. Were carers and people delivering the interventions aware of participants' assigned intervention during the trial?                                                             | PY                   |
|                                                           | 2.3. If Y/PY/NI to 2.1 or 2.2: Were there deviations from the intended intervention that arose because of the experimental context?                                                 | PY                   |
|                                                           | 2.4 If Y/PY to 2.3: Were these deviations likely to have affected the outcome?                                                                                                      | PY                   |
|                                                           | 2.5. If Y/PY/NI to 2.4: Were these deviations from intended intervention balanced between groups?                                                                                   | PY                   |
|                                                           | 2.6 Was an appropriate analysis used to estimate the effect of assignment to intervention?                                                                                          | PN                   |
|                                                           | 2.7 If N/PN/NI to 2.6: Was there potential for a substantial impact (on the result) of the failure to analyse participants in the group to which they were randomized?              | PY                   |
| <b>Risk of bias judgement</b>                             | <b>High</b>                                                                                                                                                                         |                      |
| <b>Bias due to missing outcome data</b>                   | 3.1 Were data for this outcome available for all, or nearly all, participants randomized?                                                                                           | Y                    |
|                                                           | 3.2 If N/PN/NI to 3.1: Is there evidence that result was not biased by missing outcome data?                                                                                        | NA                   |
|                                                           | 3.3 If N/PN to 3.2: Could missingness in the outcome depend on its true value?                                                                                                      | NA                   |
|                                                           | 3.4 If Y/PY/NI to 3.3: Is it likely that missingness in the outcome depended on its true value?                                                                                     | NA                   |
|                                                           | <b>Risk of bias judgement</b>                                                                                                                                                       | <b>Low</b>           |
| <b>Bias in measurement of the outcome</b>                 | 4.1 Was the method of measuring the outcome inappropriate?                                                                                                                          | PN                   |
|                                                           | 4.2 Could measurement or ascertainment of the outcome have differed between intervention groups?                                                                                    | PN                   |
|                                                           | 4.3 Were outcome assessors aware of the intervention received by study participants?                                                                                                | PY                   |
|                                                           | 4.4 If Y/PY/NI to 4.3: Could assessment of the outcome have been influenced by knowledge of intervention received?                                                                  | PY                   |
|                                                           | 4.5 If Y/PY/NI to 4.4: Is it likely that assessment of the outcome was influenced by knowledge of intervention received?                                                            | PY                   |
|                                                           | <b>Risk of bias judgement</b>                                                                                                                                                       | <b>High</b>          |
| <b>Bias in selection of the reported result</b>           | 5.1 Were the data that produced this result analysed in accordance with a pre-specified analysis plan that was finalized before unblinded outcome data were available for analysis? | PY                   |
|                                                           | 5.2 ... multiple eligible outcome measurements (e.g. scales, definitions, time points) within the outcome domain?                                                                   | NI                   |
|                                                           | 5.3 ... multiple eligible analyses of the data?                                                                                                                                     | NI                   |
|                                                           | <b>Risk of bias judgement</b>                                                                                                                                                       | <b>Some concerns</b> |
| <b>Overall bias</b>                                       | <b>Risk of bias judgement</b>                                                                                                                                                       | <b>High</b>          |

| Study                                              | Ribeiro 2008                                                                                                                                                                        |                      |
|----------------------------------------------------|-------------------------------------------------------------------------------------------------------------------------------------------------------------------------------------|----------------------|
| Domain                                             | Signalling question                                                                                                                                                                 | Response             |
| Bias arising from the randomization process        | 1.1 Was the allocation sequence random?                                                                                                                                             | PY                   |
|                                                    | 1.2 Was the allocation sequence concealed until participants were enrolled and assigned to interventions?                                                                           | PY                   |
|                                                    | 1.3 Did baseline differences between intervention groups suggest a problem with the randomization process?                                                                          | PY                   |
|                                                    | <b>Risk of bias judgement</b>                                                                                                                                                       | <b>Some concerns</b> |
| Bias due to deviations from intended interventions | 2.1. Were participants aware of their assigned intervention during the trial?                                                                                                       | Y                    |
|                                                    | 2.2. Were carers and people delivering the interventions aware of participants' assigned intervention during the trial?                                                             | PN                   |
|                                                    | 2.3. If Y/PY/NI to 2.1 or 2.2: Were there deviations from the intended intervention that arose because of the experimental context?                                                 | PY                   |
|                                                    | 2.4 If Y/PY to 2.3: Were these deviations likely to have affected the outcome?                                                                                                      | PY                   |
|                                                    | 2.5. If Y/PY/NI to 2.4: Were these deviations from intended intervention balanced between groups?                                                                                   | PY                   |
|                                                    | 2.6 Was an appropriate analysis used to estimate the effect of assignment to intervention?                                                                                          | PY                   |
|                                                    | 2.7 If N/PN/NI to 2.6: Was there potential for a substantial impact (on the result) of the failure to analyse participants in the group to which they were randomized?              | NA                   |
|                                                    | <b>Risk of bias judgement</b>                                                                                                                                                       | <b>Some concerns</b> |
| Bias due to missing outcome data                   | 3.1 Were data for this outcome available for all, or nearly all, participants randomized?                                                                                           | PN                   |
|                                                    | 3.2 If N/PN/NI to 3.1: Is there evidence that result was not biased by missing outcome data?                                                                                        | PY                   |
|                                                    | 3.3 If N/PN to 3.2: Could missingness in the outcome depend on its true value?                                                                                                      | NA                   |
|                                                    | 3.4 If Y/PY/NI to 3.3: Is it likely that missingness in the outcome depended on its true value?                                                                                     | NA                   |
|                                                    | <b>Risk of bias judgement</b>                                                                                                                                                       | <b>Low</b>           |
| Bias in measurement of the outcome                 | 4.1 Was the method of measuring the outcome inappropriate?                                                                                                                          | PN                   |
|                                                    | 4.2 Could measurement or ascertainment of the outcome have differed between intervention groups?                                                                                    | PN                   |
|                                                    | 4.3 Were outcome assessors aware of the intervention received by study participants?                                                                                                | PY                   |
|                                                    | 4.4 If Y/PY/NI to 4.3: Could assessment of the outcome have been influenced by knowledge of intervention received?                                                                  | PN                   |
|                                                    | 4.5 If Y/PY/NI to 4.4: Is it likely that assessment of the outcome was influenced by knowledge of intervention received?                                                            | NA                   |
|                                                    | <b>Risk of bias judgement</b>                                                                                                                                                       | <b>Low</b>           |
| Bias in selection of the reported result           | 5.1 Were the data that produced this result analysed in accordance with a pre-specified analysis plan that was finalized before unblinded outcome data were available for analysis? | PY                   |
|                                                    | 5.2 ... multiple eligible outcome measurements (e.g. scales, definitions, time points) within the outcome domain?                                                                   | NI                   |
|                                                    | 5.3 ... multiple eligible analyses of the data?                                                                                                                                     | NI                   |
|                                                    | <b>Risk of bias judgement</b>                                                                                                                                                       | <b>Some concerns</b> |
| Overall bias                                       | <b>Risk of bias judgement</b>                                                                                                                                                       | <b>Some concerns</b> |



| Study                                                     | Koldaş Doğan 2008                                                                                                                                                                   |                      |
|-----------------------------------------------------------|-------------------------------------------------------------------------------------------------------------------------------------------------------------------------------------|----------------------|
| Domain                                                    | Signalling question                                                                                                                                                                 | Response             |
| <b>Bias arising from the randomization process</b>        | 1.1 Was the allocation sequence random?                                                                                                                                             | Y                    |
|                                                           | 1.2 Was the allocation sequence concealed until participants were enrolled and assigned to interventions?                                                                           | PY                   |
|                                                           | 1.3 Did baseline differences between intervention groups suggest a problem with the randomization process?                                                                          | PN                   |
|                                                           | <b>Risk of bias judgement</b>                                                                                                                                                       | <b>Low</b>           |
| <b>Bias due to deviations from intended interventions</b> | 2.1. Were participants aware of their assigned intervention during the trial?                                                                                                       | PY                   |
|                                                           | 2.2. Were carers and people delivering the interventions aware of participants' assigned intervention during the trial?                                                             | PY                   |
|                                                           | 2.3. If Y/PY/NI to 2.1 or 2.2: Were there deviations from the intended intervention that arose because of the experimental context?                                                 | PY                   |
|                                                           | 2.4 If Y/PY to 2.3: Were these deviations likely to have affected the outcome?                                                                                                      | PY                   |
|                                                           | 2.5. If Y/PY/NI to 2.4: Were these deviations from intended intervention balanced between groups?                                                                                   | PY                   |
|                                                           | 2.6 Was an appropriate analysis used to estimate the effect of assignment to intervention?                                                                                          | PY                   |
|                                                           | 2.7 If N/PN/NI to 2.6: Was there potential for a substantial impact (on the result) of the failure to analyse participants in the group to which they were randomized?              | NA                   |
| <b>Risk of bias judgement</b>                             | <b>Some concerns</b>                                                                                                                                                                |                      |
| <b>Bias due to missing outcome data</b>                   | 3.1 Were data for this outcome available for all, or nearly all, participants randomized?                                                                                           | PY                   |
|                                                           | 3.2 If N/PN/NI to 3.1: Is there evidence that result was not biased by missing outcome data?                                                                                        | NA                   |
|                                                           | 3.3 If N/PN to 3.2: Could missingness in the outcome depend on its true value?                                                                                                      | NA                   |
|                                                           | 3.4 If Y/PY/NI to 3.3: Is it likely that missingness in the outcome depended on its true value?                                                                                     | NA                   |
|                                                           | <b>Risk of bias judgement</b>                                                                                                                                                       | <b>Low</b>           |
| <b>Bias in measurement of the outcome</b>                 | 4.1 Was the method of measuring the outcome inappropriate?                                                                                                                          | PN                   |
|                                                           | 4.2 Could measurement or ascertainment of the outcome have differed between intervention groups?                                                                                    | PN                   |
|                                                           | 4.3 Were outcome assessors aware of the intervention received by study participants?                                                                                                | PY                   |
|                                                           | 4.4 If Y/PY/NI to 4.3: Could assessment of the outcome have been influenced by knowledge of intervention received?                                                                  | PY                   |
|                                                           | 4.5 If Y/PY/NI to 4.4: Is it likely that assessment of the outcome was influenced by knowledge of intervention received?                                                            | PN                   |
|                                                           | <b>Risk of bias judgement</b>                                                                                                                                                       | <b>Some concerns</b> |
| <b>Bias in selection of the reported result</b>           | 5.1 Were the data that produced this result analysed in accordance with a pre-specified analysis plan that was finalized before unblinded outcome data were available for analysis? | PY                   |
|                                                           | 5.2 ... multiple eligible outcome measurements (e.g. scales, definitions, time points) within the outcome domain?                                                                   | NI                   |
|                                                           | 5.3 ... multiple eligible analyses of the data?                                                                                                                                     | NI                   |
|                                                           | <b>Risk of bias judgement</b>                                                                                                                                                       | <b>Some concerns</b> |
| <b>Overall bias</b>                                       | <b>Risk of bias judgement</b>                                                                                                                                                       | <b>Some concerns</b> |

| Study                                                     | Tavafian 2007                                                                                                                                                                       |                      |
|-----------------------------------------------------------|-------------------------------------------------------------------------------------------------------------------------------------------------------------------------------------|----------------------|
| Domain                                                    | Signalling question                                                                                                                                                                 | Response             |
| <b>Bias arising from the randomization process</b>        | 1.1 Was the allocation sequence random?                                                                                                                                             | Y                    |
|                                                           | 1.2 Was the allocation sequence concealed until participants were enrolled and assigned to interventions?                                                                           | PY                   |
|                                                           | 1.3 Did baseline differences between intervention groups suggest a problem with the randomization process?                                                                          | PN                   |
|                                                           | <b>Risk of bias judgement</b>                                                                                                                                                       | <b>Low</b>           |
| <b>Bias due to deviations from intended interventions</b> | 2.1. Were participants aware of their assigned intervention during the trial?                                                                                                       | Y                    |
|                                                           | 2.2. Were carers and people delivering the interventions aware of participants' assigned intervention during the trial?                                                             | PY                   |
|                                                           | 2.3. If Y/PY/NI to 2.1 or 2.2: Were there deviations from the intended intervention that arose because of the experimental context?                                                 | PY                   |
|                                                           | 2.4 If Y/PY to 2.3: Were these deviations likely to have affected the outcome?                                                                                                      | PY                   |
|                                                           | 2.5. If Y/PY/NI to 2.4: Were these deviations from intended intervention balanced between groups?                                                                                   | PY                   |
|                                                           | 2.6 Was an appropriate analysis used to estimate the effect of assignment to intervention?                                                                                          | PY                   |
|                                                           | 2.7 If N/PN/NI to 2.6: Was there potential for a substantial impact (on the result) of the failure to analyse participants in the group to which they were randomized?              | NA                   |
| <b>Risk of bias judgement</b>                             | <b>Some concerns</b>                                                                                                                                                                |                      |
| <b>Bias due to missing outcome data</b>                   | 3.1 Were data for this outcome available for all, or nearly all, participants randomized?                                                                                           | PY                   |
|                                                           | 3.2 If N/PN/NI to 3.1: Is there evidence that result was not biased by missing outcome data?                                                                                        | NA                   |
|                                                           | 3.3 If N/PN to 3.2: Could missingness in the outcome depend on its true value?                                                                                                      | NA                   |
|                                                           | 3.4 If Y/PY/NI to 3.3: Is it likely that missingness in the outcome depended on its true value?                                                                                     | NA                   |
|                                                           | <b>Risk of bias judgement</b>                                                                                                                                                       | <b>Low</b>           |
| <b>Bias in measurement of the outcome</b>                 | 4.1 Was the method of measuring the outcome inappropriate?                                                                                                                          | PN                   |
|                                                           | 4.2 Could measurement or ascertainment of the outcome have differed between intervention groups?                                                                                    | PN                   |
|                                                           | 4.3 Were outcome assessors aware of the intervention received by study participants?                                                                                                | PY                   |
|                                                           | 4.4 If Y/PY/NI to 4.3: Could assessment of the outcome have been influenced by knowledge of intervention received?                                                                  | PY                   |
|                                                           | 4.5 If Y/PY/NI to 4.4: Is it likely that assessment of the outcome was influenced by knowledge of intervention received?                                                            | PN                   |
|                                                           | <b>Risk of bias judgement</b>                                                                                                                                                       | <b>Some concerns</b> |
| <b>Bias in selection of the reported result</b>           | 5.1 Were the data that produced this result analysed in accordance with a pre-specified analysis plan that was finalized before unblinded outcome data were available for analysis? | PY                   |
|                                                           | 5.2 ... multiple eligible outcome measurements (e.g. scales, definitions, time points) within the outcome domain?                                                                   | PN                   |
|                                                           | 5.3 ... multiple eligible analyses of the data?                                                                                                                                     | PN                   |
|                                                           | <b>Risk of bias judgement</b>                                                                                                                                                       | <b>Low</b>           |
| <b>Overall bias</b>                                       | <b>Risk of bias judgement</b>                                                                                                                                                       | <b>Some concerns</b> |

| Study                                                     | Kaapa 2006                                                                                                                                                                          |            |
|-----------------------------------------------------------|-------------------------------------------------------------------------------------------------------------------------------------------------------------------------------------|------------|
| Domain                                                    | Signalling question                                                                                                                                                                 | Response   |
| <b>Bias arising from the randomization process</b>        | 1.1 Was the allocation sequence random?                                                                                                                                             | Y          |
|                                                           | 1.2 Was the allocation sequence concealed until participants were enrolled and assigned to interventions?                                                                           | PY         |
|                                                           | 1.3 Did baseline differences between intervention groups suggest a problem with the randomization process?                                                                          | NI         |
|                                                           | <b>Risk of bias judgement</b>                                                                                                                                                       | <b>Low</b> |
| <b>Bias due to deviations from intended interventions</b> | 2.1. Were participants aware of their assigned intervention during the trial?                                                                                                       | PY         |
|                                                           | 2.2. Were carers and people delivering the interventions aware of participants' assigned intervention during the trial?                                                             | PN         |
|                                                           | 2.3. If Y/PY/NI to 2.1 or 2.2: Were there deviations from the intended intervention that arose because of the experimental context?                                                 | PN         |
|                                                           | 2.4 If Y/PY to 2.3: Were these deviations likely to have affected the outcome?                                                                                                      | NA         |
|                                                           | 2.5. If Y/PY/NI to 2.4: Were these deviations from intended intervention balanced between groups?                                                                                   | NA         |
|                                                           | 2.6 Was an appropriate analysis used to estimate the effect of assignment to intervention?                                                                                          | PY         |
|                                                           | 2.7 If N/PN/NI to 2.6: Was there potential for a substantial impact (on the result) of the failure to analyse participants in the group to which they were randomized?              | NA         |
| <b>Risk of bias judgement</b>                             | <b>Low</b>                                                                                                                                                                          |            |
| <b>Bias due to missing outcome data</b>                   | 3.1 Were data for this outcome available for all, or nearly all, participants randomized?                                                                                           | PN         |
|                                                           | 3.2 If N/PN/NI to 3.1: Is there evidence that result was not biased by missing outcome data?                                                                                        | PY         |
|                                                           | 3.3 If N/PN to 3.2: Could missingness in the outcome depend on its true value?                                                                                                      | NA         |
|                                                           | 3.4 If Y/PY/NI to 3.3: Is it likely that missingness in the outcome depended on its true value?                                                                                     | NA         |
|                                                           | <b>Risk of bias judgement</b>                                                                                                                                                       | <b>Low</b> |
| <b>Bias in measurement of the outcome</b>                 | 4.1 Was the method of measuring the outcome inappropriate?                                                                                                                          | PN         |
|                                                           | 4.2 Could measurement or ascertainment of the outcome have differed between intervention groups?                                                                                    | PN         |
|                                                           | 4.3 Were outcome assessors aware of the intervention received by study participants?                                                                                                | NI         |
|                                                           | 4.4 If Y/PY/NI to 4.3: Could assessment of the outcome have been influenced by knowledge of intervention received?                                                                  | PN         |
|                                                           | 4.5 If Y/PY/NI to 4.4: Is it likely that assessment of the outcome was influenced by knowledge of intervention received?                                                            | NA         |
|                                                           | <b>Risk of bias judgement</b>                                                                                                                                                       | <b>Low</b> |
| <b>Bias in selection of the reported result</b>           | 5.1 Were the data that produced this result analysed in accordance with a pre-specified analysis plan that was finalized before unblinded outcome data were available for analysis? | PY         |
|                                                           | 5.2 ... multiple eligible outcome measurements (e.g. scales, definitions, time points) within the outcome domain?                                                                   | PN         |
|                                                           | 5.3 ... multiple eligible analyses of the data?                                                                                                                                     | PN         |
|                                                           | <b>Risk of bias judgement</b>                                                                                                                                                       | <b>Low</b> |
| <b>Overall bias</b>                                       | <b>Risk of bias judgement</b>                                                                                                                                                       | <b>Low</b> |

| Study                                                     | Galantino 2004                                                                                                                                                                      |                      |
|-----------------------------------------------------------|-------------------------------------------------------------------------------------------------------------------------------------------------------------------------------------|----------------------|
| Domain                                                    | Signalling question                                                                                                                                                                 | Response             |
| <b>Bias arising from the randomization process</b>        | 1.1 Was the allocation sequence random?                                                                                                                                             | Y                    |
|                                                           | 1.2 Was the allocation sequence concealed until participants were enrolled and assigned to interventions?                                                                           | Y                    |
|                                                           | 1.3 Did baseline differences between intervention groups suggest a problem with the randomization process?                                                                          | PN                   |
|                                                           | <b>Risk of bias judgement</b>                                                                                                                                                       | <b>Low</b>           |
| <b>Bias due to deviations from intended interventions</b> | 2.1. Were participants aware of their assigned intervention during the trial?                                                                                                       | PY                   |
|                                                           | 2.2. Were carers and people delivering the interventions aware of participants' assigned intervention during the trial?                                                             | PY                   |
|                                                           | 2.3. If Y/PY/NI to 2.1 or 2.2: Were there deviations from the intended intervention that arose because of the experimental context?                                                 | PY                   |
|                                                           | 2.4 If Y/PY to 2.3: Were these deviations likely to have affected the outcome?                                                                                                      | PY                   |
|                                                           | 2.5. If Y/PY/NI to 2.4: Were these deviations from intended intervention balanced between groups?                                                                                   | PY                   |
|                                                           | 2.6 Was an appropriate analysis used to estimate the effect of assignment to intervention?                                                                                          | PY                   |
|                                                           | 2.7 If N/PN/NI to 2.6: Was there potential for a substantial impact (on the result) of the failure to analyse participants in the group to which they were randomized?              | NA                   |
|                                                           | <b>Risk of bias judgement</b>                                                                                                                                                       | <b>Some concerns</b> |
| <b>Bias due to missing outcome data</b>                   | 3.1 Were data for this outcome available for all, or nearly all, participants randomized?                                                                                           | PN                   |
|                                                           | 3.2 If N/PN/NI to 3.1: Is there evidence that result was not biased by missing outcome data?                                                                                        | PY                   |
|                                                           | 3.3 If N/PN to 3.2: Could missingness in the outcome depend on its true value?                                                                                                      | NA                   |
|                                                           | 3.4 If Y/PY/NI to 3.3: Is it likely that missingness in the outcome depended on its true value?                                                                                     | NA                   |
|                                                           | <b>Risk of bias judgement</b>                                                                                                                                                       | <b>Low</b>           |
| <b>Bias in measurement of the outcome</b>                 | 4.1 Was the method of measuring the outcome inappropriate?                                                                                                                          | PN                   |
|                                                           | 4.2 Could measurement or ascertainment of the outcome have differed between intervention groups?                                                                                    | PN                   |
|                                                           | 4.3 Were outcome assessors aware of the intervention received by study participants?                                                                                                | PY                   |
|                                                           | 4.4 If Y/PY/NI to 4.3: Could assessment of the outcome have been influenced by knowledge of intervention received?                                                                  | PY                   |
|                                                           | 4.5 If Y/PY/NI to 4.4: Is it likely that assessment of the outcome was influenced by knowledge of intervention received?                                                            | PN                   |
|                                                           | <b>Risk of bias judgement</b>                                                                                                                                                       | <b>Some concerns</b> |
| <b>Bias in selection of the reported result</b>           | 5.1 Were the data that produced this result analysed in accordance with a pre-specified analysis plan that was finalized before unblinded outcome data were available for analysis? | PY                   |
|                                                           | 5.2 ... multiple eligible outcome measurements (e.g. scales, definitions, time points) within the outcome domain?                                                                   | NI                   |
|                                                           | 5.3 ... multiple eligible analyses of the data?                                                                                                                                     | NI                   |
|                                                           | <b>Risk of bias judgement</b>                                                                                                                                                       | <b>Some concerns</b> |
| <b>Overall bias</b>                                       | <b>Risk of bias judgement</b>                                                                                                                                                       | <b>Some concerns</b> |

| Study                                                     | Weiner 2003                                                                                                                                                                         |                      |
|-----------------------------------------------------------|-------------------------------------------------------------------------------------------------------------------------------------------------------------------------------------|----------------------|
| Domain                                                    | Signalling question                                                                                                                                                                 | Response             |
| <b>Bias arising from the randomization process</b>        | 1.1 Was the allocation sequence random?                                                                                                                                             | Y                    |
|                                                           | 1.2 Was the allocation sequence concealed until participants were enrolled and assigned to interventions?                                                                           | PY                   |
|                                                           | 1.3 Did baseline differences between intervention groups suggest a problem with the randomization process?                                                                          | PN                   |
|                                                           | <b>Risk of bias judgement</b>                                                                                                                                                       | <b>Low</b>           |
| <b>Bias due to deviations from intended interventions</b> | 2.1. Were participants aware of their assigned intervention during the trial?                                                                                                       | PY                   |
|                                                           | 2.2. Were carers and people delivering the interventions aware of participants' assigned intervention during the trial?                                                             | PY                   |
|                                                           | 2.3. If Y/PY/NI to 2.1 or 2.2: Were there deviations from the intended intervention that arose because of the experimental context?                                                 | PY                   |
|                                                           | 2.4 If Y/PY to 2.3: Were these deviations likely to have affected the outcome?                                                                                                      | PN                   |
|                                                           | 2.5. If Y/PY/NI to 2.4: Were these deviations from intended intervention balanced between groups?                                                                                   | NA                   |
|                                                           | 2.6 Was an appropriate analysis used to estimate the effect of assignment to intervention?                                                                                          | PY                   |
|                                                           | 2.7 If N/PN/NI to 2.6: Was there potential for a substantial impact (on the result) of the failure to analyse participants in the group to which they were randomized?              | NA                   |
| <b>Risk of bias judgement</b>                             | <b>Some concerns</b>                                                                                                                                                                |                      |
| <b>Bias due to missing outcome data</b>                   | 3.1 Were data for this outcome available for all, or nearly all, participants randomized?                                                                                           | PY                   |
|                                                           | 3.2 If N/PN/NI to 3.1: Is there evidence that result was not biased by missing outcome data?                                                                                        | NA                   |
|                                                           | 3.3 If N/PN to 3.2: Could missingness in the outcome depend on its true value?                                                                                                      | NA                   |
|                                                           | 3.4 If Y/PY/NI to 3.3: Is it likely that missingness in the outcome depended on its true value?                                                                                     | NA                   |
|                                                           | <b>Risk of bias judgement</b>                                                                                                                                                       | <b>Low</b>           |
| <b>Bias in measurement of the outcome</b>                 | 4.1 Was the method of measuring the outcome inappropriate?                                                                                                                          | PN                   |
|                                                           | 4.2 Could measurement or ascertainment of the outcome have differed between intervention groups?                                                                                    | PN                   |
|                                                           | 4.3 Were outcome assessors aware of the intervention received by study participants?                                                                                                | PY                   |
|                                                           | 4.4 If Y/PY/NI to 4.3: Could assessment of the outcome have been influenced by knowledge of intervention received?                                                                  | PN                   |
|                                                           | 4.5 If Y/PY/NI to 4.4: Is it likely that assessment of the outcome was influenced by knowledge of intervention received?                                                            | NA                   |
|                                                           | <b>Risk of bias judgement</b>                                                                                                                                                       | <b>Low</b>           |
| <b>Bias in selection of the reported result</b>           | 5.1 Were the data that produced this result analysed in accordance with a pre-specified analysis plan that was finalized before unblinded outcome data were available for analysis? | PY                   |
|                                                           | 5.2 ... multiple eligible outcome measurements (e.g. scales, definitions, time points) within the outcome domain?                                                                   | PN                   |
|                                                           | 5.3 ... multiple eligible analyses of the data?                                                                                                                                     | PN                   |
|                                                           | <b>Risk of bias judgement</b>                                                                                                                                                       | <b>Low</b>           |
| <b>Overall bias</b>                                       | <b>Risk of bias judgement</b>                                                                                                                                                       | <b>Some concerns</b> |

| Study                                                     | Niemisto 2003                                                                                                                                                                       |                      |
|-----------------------------------------------------------|-------------------------------------------------------------------------------------------------------------------------------------------------------------------------------------|----------------------|
| Domain                                                    | Signalling question                                                                                                                                                                 | Response             |
| <b>Bias arising from the randomization process</b>        | 1.1 Was the allocation sequence random?                                                                                                                                             | Y                    |
|                                                           | 1.2 Was the allocation sequence concealed until participants were enrolled and assigned to interventions?                                                                           | PY                   |
|                                                           | 1.3 Did baseline differences between intervention groups suggest a problem with the randomization process?                                                                          | PN                   |
|                                                           | <b>Risk of bias judgement</b>                                                                                                                                                       | <b>Low</b>           |
| <b>Bias due to deviations from intended interventions</b> | 2.1. Were participants aware of their assigned intervention during the trial?                                                                                                       | PY                   |
|                                                           | 2.2. Were carers and people delivering the interventions aware of participants' assigned intervention during the trial?                                                             | PY                   |
|                                                           | 2.3. If Y/PY/NI to 2.1 or 2.2: Were there deviations from the intended intervention that arose because of the experimental context?                                                 | PY                   |
|                                                           | 2.4 If Y/PY to 2.3: Were these deviations likely to have affected the outcome?                                                                                                      | PY                   |
|                                                           | 2.5. If Y/PY/NI to 2.4: Were these deviations from intended intervention balanced between groups?                                                                                   | PY                   |
|                                                           | 2.6 Was an appropriate analysis used to estimate the effect of assignment to intervention?                                                                                          | PY                   |
|                                                           | 2.7 If N/PN/NI to 2.6: Was there potential for a substantial impact (on the result) of the failure to analyse participants in the group to which they were randomized?              | NA                   |
| <b>Risk of bias judgement</b>                             | <b>Some concerns</b>                                                                                                                                                                |                      |
| <b>Bias due to missing outcome data</b>                   | 3.1 Were data for this outcome available for all, or nearly all, participants randomized?                                                                                           | PN                   |
|                                                           | 3.2 If N/PN/NI to 3.1: Is there evidence that result was not biased by missing outcome data?                                                                                        | PN                   |
|                                                           | 3.3 If N/PN to 3.2: Could missingness in the outcome depend on its true value?                                                                                                      | PY                   |
|                                                           | 3.4 If Y/PY/NI to 3.3: Is it likely that missingness in the outcome depended on its true value?                                                                                     | PN                   |
|                                                           | <b>Risk of bias judgement</b>                                                                                                                                                       | <b>Some concerns</b> |
| <b>Bias in measurement of the outcome</b>                 | 4.1 Was the method of measuring the outcome inappropriate?                                                                                                                          | PN                   |
|                                                           | 4.2 Could measurement or ascertainment of the outcome have differed between intervention groups?                                                                                    | PY                   |
|                                                           | 4.3 Were outcome assessors aware of the intervention received by study participants?                                                                                                | NA                   |
|                                                           | 4.4 If Y/PY/NI to 4.3: Could assessment of the outcome have been influenced by knowledge of intervention received?                                                                  | NA                   |
|                                                           | 4.5 If Y/PY/NI to 4.4: Is it likely that assessment of the outcome was influenced by knowledge of intervention received?                                                            | NA                   |
|                                                           | <b>Risk of bias judgement</b>                                                                                                                                                       | <b>High</b>          |
| <b>Bias in selection of the reported result</b>           | 5.1 Were the data that produced this result analysed in accordance with a pre-specified analysis plan that was finalized before unblinded outcome data were available for analysis? | PY                   |
|                                                           | 5.2 ... multiple eligible outcome measurements (e.g. scales, definitions, time points) within the outcome domain?                                                                   | NI                   |
|                                                           | 5.3 ... multiple eligible analyses of the data?                                                                                                                                     | NI                   |
|                                                           | <b>Risk of bias judgement</b>                                                                                                                                                       | <b>Some concerns</b> |
| <b>Overall bias</b>                                       | <b>Risk of bias judgement</b>                                                                                                                                                       | <b>High</b>          |

| Study                                                     | Hernandez-Reif 2001                                                                                                                                                                 |                      |
|-----------------------------------------------------------|-------------------------------------------------------------------------------------------------------------------------------------------------------------------------------------|----------------------|
| Domain                                                    | Signalling question                                                                                                                                                                 | Response             |
| <b>Bias arising from the randomization process</b>        | 1.1 Was the allocation sequence random?                                                                                                                                             | Y                    |
|                                                           | 1.2 Was the allocation sequence concealed until participants were enrolled and assigned to interventions?                                                                           | NI                   |
|                                                           | 1.3 Did baseline differences between intervention groups suggest a problem with the randomization process?                                                                          | PN                   |
|                                                           | <b>Risk of bias judgement</b>                                                                                                                                                       | <b>Some concerns</b> |
| <b>Bias due to deviations from intended interventions</b> | 2.1. Were participants aware of their assigned intervention during the trial?                                                                                                       | PY                   |
|                                                           | 2.2. Were carers and people delivering the interventions aware of participants' assigned intervention during the trial?                                                             | PY                   |
|                                                           | 2.3. If Y/PY/NI to 2.1 or 2.2: Were there deviations from the intended intervention that arose because of the experimental context?                                                 | PY                   |
|                                                           | 2.4 If Y/PY to 2.3: Were these deviations likely to have affected the outcome?                                                                                                      | PN                   |
|                                                           | 2.5. If Y/PY/NI to 2.4: Were these deviations from intended intervention balanced between groups?                                                                                   | NA                   |
|                                                           | 2.6 Was an appropriate analysis used to estimate the effect of assignment to intervention?                                                                                          | PY                   |
|                                                           | 2.7 If N/PN/NI to 2.6: Was there potential for a substantial impact (on the result) of the failure to analyse participants in the group to which they were randomized?              | NA                   |
| <b>Risk of bias judgement</b>                             | <b>Some concerns</b>                                                                                                                                                                |                      |
| <b>Bias due to missing outcome data</b>                   | 3.1 Were data for this outcome available for all, or nearly all, participants randomized?                                                                                           | PY                   |
|                                                           | 3.2 If N/PN/NI to 3.1: Is there evidence that result was not biased by missing outcome data?                                                                                        | NA                   |
|                                                           | 3.3 If N/PN to 3.2: Could missingness in the outcome depend on its true value?                                                                                                      | NA                   |
|                                                           | 3.4 If Y/PY/NI to 3.3: Is it likely that missingness in the outcome depended on its true value?                                                                                     | NA                   |
|                                                           | <b>Risk of bias judgement</b>                                                                                                                                                       | <b>Low</b>           |
| <b>Bias in measurement of the outcome</b>                 | 4.1 Was the method of measuring the outcome inappropriate?                                                                                                                          | PN                   |
|                                                           | 4.2 Could measurement or ascertainment of the outcome have differed between intervention groups?                                                                                    | PN                   |
|                                                           | 4.3 Were outcome assessors aware of the intervention received by study participants?                                                                                                | PY                   |
|                                                           | 4.4 If Y/PY/NI to 4.3: Could assessment of the outcome have been influenced by knowledge of intervention received?                                                                  | PN                   |
|                                                           | 4.5 If Y/PY/NI to 4.4: Is it likely that assessment of the outcome was influenced by knowledge of intervention received?                                                            | NA                   |
|                                                           | <b>Risk of bias judgement</b>                                                                                                                                                       | <b>Low</b>           |
| <b>Bias in selection of the reported result</b>           | 5.1 Were the data that produced this result analysed in accordance with a pre-specified analysis plan that was finalized before unblinded outcome data were available for analysis? | PY                   |
|                                                           | 5.2 ... multiple eligible outcome measurements (e.g. scales, definitions, time points) within the outcome domain?                                                                   | NI                   |
|                                                           | 5.3 ... multiple eligible analyses of the data?                                                                                                                                     | NI                   |
|                                                           | <b>Risk of bias judgement</b>                                                                                                                                                       | <b>Some concerns</b> |
| <b>Overall bias</b>                                       | <b>Risk of bias judgement</b>                                                                                                                                                       | <b>Some concerns</b> |

| Study                                              | Newton-John 1995                                                                                                                                                                    |                      |
|----------------------------------------------------|-------------------------------------------------------------------------------------------------------------------------------------------------------------------------------------|----------------------|
| Domain                                             | Signalling question                                                                                                                                                                 | Response             |
| Bias arising from the randomization process        | 1.1 Was the allocation sequence random?                                                                                                                                             | PY                   |
|                                                    | 1.2 Was the allocation sequence concealed until participants were enrolled and assigned to interventions?                                                                           | PY                   |
|                                                    | 1.3 Did baseline differences between intervention groups suggest a problem with the randomization process?                                                                          | NI                   |
|                                                    | <b>Risk of bias judgement</b>                                                                                                                                                       | <b>Low</b>           |
| Bias due to deviations from intended interventions | 2.1. Were participants aware of their assigned intervention during the trial?                                                                                                       | PY                   |
|                                                    | 2.2. Were carers and people delivering the interventions aware of participants' assigned intervention during the trial?                                                             | PY                   |
|                                                    | 2.3. If Y/PY/NI to 2.1 or 2.2: Were there deviations from the intended intervention that arose because of the experimental context?                                                 | PY                   |
|                                                    | 2.4 If Y/PY to 2.3: Were these deviations likely to have affected the outcome?                                                                                                      | PY                   |
|                                                    | 2.5. If Y/PY/NI to 2.4: Were these deviations from intended intervention balanced between groups?                                                                                   | PY                   |
|                                                    | 2.6 Was an appropriate analysis used to estimate the effect of assignment to intervention?                                                                                          | PN                   |
|                                                    | 2.7 If N/PN/NI to 2.6: Was there potential for a substantial impact (on the result) of the failure to analyse participants in the group to which they were randomized?              | PN                   |
| <b>Risk of bias judgement</b>                      | <b>Some concerns</b>                                                                                                                                                                |                      |
| Bias due to missing outcome data                   | 3.1 Were data for this outcome available for all, or nearly all, participants randomized?                                                                                           | PN                   |
|                                                    | 3.2 If N/PN/NI to 3.1: Is there evidence that result was not biased by missing outcome data?                                                                                        | PN                   |
|                                                    | 3.3 If N/PN to 3.2: Could missingness in the outcome depend on its true value?                                                                                                      | PY                   |
|                                                    | 3.4 If Y/PY/NI to 3.3: Is it likely that missingness in the outcome depended on its true value?                                                                                     | PN                   |
|                                                    | <b>Risk of bias judgement</b>                                                                                                                                                       | <b>Some concerns</b> |
| Bias in measurement of the outcome                 | 4.1 Was the method of measuring the outcome inappropriate?                                                                                                                          | PN                   |
|                                                    | 4.2 Could measurement or ascertainment of the outcome have differed between intervention groups?                                                                                    | PN                   |
|                                                    | 4.3 Were outcome assessors aware of the intervention received by study participants?                                                                                                | PY                   |
|                                                    | 4.4 If Y/PY/NI to 4.3: Could assessment of the outcome have been influenced by knowledge of intervention received?                                                                  | PN                   |
|                                                    | 4.5 If Y/PY/NI to 4.4: Is it likely that assessment of the outcome was influenced by knowledge of intervention received?                                                            | NA                   |
|                                                    | <b>Risk of bias judgement</b>                                                                                                                                                       | <b>Low</b>           |
| Bias in selection of the reported result           | 5.1 Were the data that produced this result analysed in accordance with a pre-specified analysis plan that was finalized before unblinded outcome data were available for analysis? | PY                   |
|                                                    | 5.2 ... multiple eligible outcome measurements (e.g. scales, definitions, time points) within the outcome domain?                                                                   | NI                   |
|                                                    | 5.3 ... multiple eligible analyses of the data?                                                                                                                                     | NI                   |
|                                                    | <b>Risk of bias judgement</b>                                                                                                                                                       | <b>Some concerns</b> |
| Overall bias                                       | <b>Risk of bias judgement</b>                                                                                                                                                       | <b>Some concerns</b> |



| Study                                              | Turner 1993                                                                                                                                                                         |                      |
|----------------------------------------------------|-------------------------------------------------------------------------------------------------------------------------------------------------------------------------------------|----------------------|
| Domain                                             | Signalling question                                                                                                                                                                 | Response             |
| Bias arising from the randomization process        | 1.1 Was the allocation sequence random?                                                                                                                                             | PY                   |
|                                                    | 1.2 Was the allocation sequence concealed until participants were enrolled and assigned to interventions?                                                                           | PY                   |
|                                                    | 1.3 Did baseline differences between intervention groups suggest a problem with the randomization process?                                                                          | PY                   |
|                                                    | <b>Risk of bias judgement</b>                                                                                                                                                       | <b>Some concerns</b> |
| Bias due to deviations from intended interventions | 2.1. Were participants aware of their assigned intervention during the trial?                                                                                                       | PY                   |
|                                                    | 2.2. Were carers and people delivering the interventions aware of participants' assigned intervention during the trial?                                                             | PY                   |
|                                                    | 2.3. If Y/PY/NI to 2.1 or 2.2: Were there deviations from the intended intervention that arose because of the experimental context?                                                 | PN                   |
|                                                    | 2.4 If Y/PY to 2.3: Were these deviations likely to have affected the outcome?                                                                                                      | NA                   |
|                                                    | 2.5. If Y/PY/NI to 2.4: Were these deviations from intended intervention balanced between groups?                                                                                   | NA                   |
|                                                    | 2.6 Was an appropriate analysis used to estimate the effect of assignment to intervention?                                                                                          | PY                   |
|                                                    | 2.7 If N/PN/NI to 2.6: Was there potential for a substantial impact (on the result) of the failure to analyse participants in the group to which they were randomized?              | NA                   |
|                                                    | <b>Risk of bias judgement</b>                                                                                                                                                       | <b>Low</b>           |
| Bias due to missing outcome data                   | 3.1 Were data for this outcome available for all, or nearly all, participants randomized?                                                                                           | PN                   |
|                                                    | 3.2 If N/PN/NI to 3.1: Is there evidence that result was not biased by missing outcome data?                                                                                        | PN                   |
|                                                    | 3.3 If N/PN to 3.2: Could missingness in the outcome depend on its true value?                                                                                                      | Y                    |
|                                                    | 3.4 If Y/PY/NI to 3.3: Is it likely that missingness in the outcome depended on its true value?                                                                                     | PY                   |
|                                                    | <b>Risk of bias judgement</b>                                                                                                                                                       | <b>High</b>          |
| Bias in measurement of the outcome                 | 4.1 Was the method of measuring the outcome inappropriate?                                                                                                                          | PN                   |
|                                                    | 4.2 Could measurement or ascertainment of the outcome have differed between intervention groups?                                                                                    | PN                   |
|                                                    | 4.3 Were outcome assessors aware of the intervention received by study participants?                                                                                                | PY                   |
|                                                    | 4.4 If Y/PY/NI to 4.3: Could assessment of the outcome have been influenced by knowledge of intervention received?                                                                  | PY                   |
|                                                    | 4.5 If Y/PY/NI to 4.4: Is it likely that assessment of the outcome was influenced by knowledge of intervention received?                                                            | PN                   |
|                                                    | <b>Risk of bias judgement</b>                                                                                                                                                       | <b>Some concerns</b> |
| Bias in selection of the reported result           | 5.1 Were the data that produced this result analysed in accordance with a pre-specified analysis plan that was finalized before unblinded outcome data were available for analysis? | PY                   |
|                                                    | 5.2 ... multiple eligible outcome measurements (e.g. scales, definitions, time points) within the outcome domain?                                                                   | NI                   |
|                                                    | 5.3 ... multiple eligible analyses of the data?                                                                                                                                     | NI                   |
|                                                    | <b>Risk of bias judgement</b>                                                                                                                                                       | <b>Some concerns</b> |
| Overall bias                                       | <b>Risk of bias judgement</b>                                                                                                                                                       | <b>High</b>          |

**Appendix 7. Certainty of evidence ratings on direct evidence of different categories of interventions for depression, anxiety, and mental health**

| Comparison           | SMD 95%(CI)          | Risk of bias         | Inconsistency       | Indirectness | Publication bias | Need to assess indirect | Preliminary rating |
|----------------------|----------------------|----------------------|---------------------|--------------|------------------|-------------------------|--------------------|
| <b>Depression</b>    |                      |                      |                     |              |                  |                         |                    |
| EX vs CO             | -0.21 (-0.40, -0.01) | Downgrade two levels | No downgrade        | No downgrade | No downgrade     | Yes                     | Low                |
| MBT vs CO            | -1.28 (-2.11, -0.44) | No downgrade         | Downgrade one level | No downgrade | NA               | Yes                     | Moderate           |
| EDU vs CO            | -0.24 (-0.61, 0.13)  | Downgrade two levels | Downgrade one level | No downgrade | NA               | Yes                     | Very low           |
| TM vs CO             | 0.08 (-0.48, 0.63)   | Downgrade one level  | Downgrade one level | No downgrade | NA               | Yes                     | Low                |
| BA vs CO             | -0.42 (-0.73, -0.12) | Downgrade one level  | Downgrade one level | No downgrade | No downgrade     | Yes                     | Low                |
| MUI vs CO            | -0.13 (-0.29, 0.02)  | Downgrade two levels | No downgrade        | No downgrade | NA               | Yes                     | Low                |
| PT vs CO             | -0.25 (-0.39, -0.10) | Downgrade one level  | No downgrade        | No downgrade | No downgrade     | Yes                     | Moderate           |
| BA vs EDU            | -0.39 (-0.71, -0.07) | Downgrade one level  | NA                  | No downgrade | NA               | Yes                     | Moderate           |
| BA vs EX             | 0.36 (-0.39, 1.11)   | Downgrade two levels | NA                  | No downgrade | NA               | Yes                     | Low                |
| EX vs MUI            | 0.34 (-1.25, 1.93)   | Downgrade one level  | Downgrade one level | No downgrade | NA               | Yes                     | Low                |
| EX vs PT             | 0.13 (-0.47, 0.74)   | Downgrade one level  | Downgrade one level | No downgrade | NA               | Yes                     | Low                |
| MUI vs PT            | -0.98 (-1.88, -0.09) | Downgrade one level  | NA                  | No downgrade | NA               | Yes                     | Moderate           |
| BA vs MUI            | -0.05 (-0.75, 0.65)  | Downgrade one level  | NA                  | No downgrade | NA               | Yes                     | Moderate           |
| BA vs MBT            | NA                   | NA                   | NA                  | NA           | NA               | Yes                     | NA                 |
| BA vs PT             | NA                   | NA                   | NA                  | NA           | NA               | Yes                     | NA                 |
| BA vs TM             | NA                   | NA                   | NA                  | NA           | NA               | Yes                     | NA                 |
| EDU vs EX            | NA                   | NA                   | NA                  | NA           | NA               | Yes                     | NA                 |
| EDU vs MBT           | NA                   | NA                   | NA                  | NA           | NA               | Yes                     | NA                 |
| EDU vs MUI           | NA                   | NA                   | NA                  | NA           | NA               | Yes                     | NA                 |
| EDU vs PT            | NA                   | NA                   | NA                  | NA           | NA               | Yes                     | NA                 |
| EDU vs TM            | NA                   | NA                   | NA                  | NA           | NA               | Yes                     | NA                 |
| EX vs MBT            | NA                   | NA                   | NA                  | NA           | NA               | Yes                     | NA                 |
| EX vs TM             | NA                   | NA                   | NA                  | NA           | NA               | Yes                     | NA                 |
| MBT vs MUI           | NA                   | NA                   | NA                  | NA           | NA               | Yes                     | NA                 |
| MBT vs PT            | NA                   | NA                   | NA                  | NA           | NA               | Yes                     | NA                 |
| MBT vs TM            | NA                   | NA                   | NA                  | NA           | NA               | Yes                     | NA                 |
| MUI vs TM            | NA                   | NA                   | NA                  | NA           | NA               | Yes                     | NA                 |
| PT vs TM             | NA                   | NA                   | NA                  | NA           | NA               | Yes                     | NA                 |
| <b>Anxiety</b>       |                      |                      |                     |              |                  |                         |                    |
| EX vs CO             | -0.27 (-0.54, 0.00)  | Downgrade one level  | No downgrade        | No downgrade | NA               | Yes                     | Moderate           |
| MBT vs CO            | -1.34 (-1.66, -1.02) | No downgrade         | No downgrade        | No downgrade | NA               | Yes                     | High               |
| EDU vs CO            | -0.55 (-1.04, -0.06) | Downgrade one level  | Downgrade one level | No downgrade | NA               | Yes                     | Low                |
| TM vs CO             | -0.03 (-0.50, 0.44)  | No downgrade         | No downgrade        | No downgrade | NA               | Yes                     | High               |
| BA vs CO             | -0.47 (-0.88, -0.06) | Downgrade one level  | Downgrade one level | No downgrade | No downgrade     | Yes                     | Low                |
| MUI vs CO            | -0.41 (-0.63, -0.19) | Downgrade one level  | No downgrade        | No downgrade | NA               | Yes                     | Moderate           |
| PT vs CO             | 0.33 (-0.13, 0.79)   | Downgrade two levels | No downgrade        | No downgrade | NA               | Yes                     | Low                |
| EX vs MUI            | 0.59 (-0.14, 1.33)   | Downgrade one level  | Downgrade one level | No downgrade | NA               | Yes                     | Low                |
| EX vs PT             | 0.35 (-0.83, 1.53)   | Downgrade one level  | Downgrade one level | No downgrade | NA               | Yes                     | Low                |
| BA vs EDU            | -0.29 (-0.60, 0.03)  | Downgrade one level  | NA                  | No downgrade | NA               | Yes                     | Moderate           |
| MUI vs PT            | -1.53 (-2.51, -0.55) | Downgrade one level  | NA                  | No downgrade | NA               | Yes                     | Moderate           |
| BA vs EX             | 0.04 (-0.36, 0.43)   | Downgrade two levels | NA                  | No downgrade | NA               | Yes                     | Low                |
| BA vs MBT            | NA                   | NA                   | NA                  | NA           | NA               | Yes                     | NA                 |
| BA vs MUI            | NA                   | NA                   | NA                  | NA           | NA               | Yes                     | NA                 |
| BA vs PT             | NA                   | NA                   | NA                  | NA           | NA               | Yes                     | NA                 |
| BA vs TM             | NA                   | NA                   | NA                  | NA           | NA               | Yes                     | NA                 |
| EDU vs EX            | NA                   | NA                   | NA                  | NA           | NA               | Yes                     | NA                 |
| EDU vs MBT           | NA                   | NA                   | NA                  | NA           | NA               | Yes                     | NA                 |
| EDU vs MUI           | NA                   | NA                   | NA                  | NA           | NA               | Yes                     | NA                 |
| EDU vs PT            | NA                   | NA                   | NA                  | NA           | NA               | Yes                     | NA                 |
| EDU vs TM            | NA                   | NA                   | NA                  | NA           | NA               | Yes                     | NA                 |
| EX vs MBT            | NA                   | NA                   | NA                  | NA           | NA               | Yes                     | NA                 |
| EX vs TM             | NA                   | NA                   | NA                  | NA           | NA               | Yes                     | NA                 |
| MBT vs MUI           | NA                   | NA                   | NA                  | NA           | NA               | Yes                     | NA                 |
| MBT vs PT            | NA                   | NA                   | NA                  | NA           | NA               | Yes                     | NA                 |
| MBT vs TM            | NA                   | NA                   | NA                  | NA           | NA               | Yes                     | NA                 |
| MUI vs TM            | NA                   | NA                   | NA                  | NA           | NA               | Yes                     | NA                 |
| PT vs TM             | NA                   | NA                   | NA                  | NA           | NA               | Yes                     | NA                 |
| <b>Mental health</b> |                      |                      |                     |              |                  |                         |                    |
| EX vs CO             | 0.56 (0.01, 1.11)    | Downgrade one level  | Downgrade one level | No downgrade | NA               | Yes                     | Low                |
| EDU vs CO            | 0.30 (-0.11, 0.71)   | Downgrade two levels | Downgrade one level | No downgrade | NA               | Yes                     | Very low           |

|            |                     |                      |                     |              |              |     |          |
|------------|---------------------|----------------------|---------------------|--------------|--------------|-----|----------|
| TM vs CO   | 0.41 (-0.69, 1.50)  | No downgrade         | Downgrade one level | No downgrade | NA           | Yes | Moderate |
| BA vs CO   | 0.43 (-0.29, 1.14)  | No downgrade         | Downgrade one level | No downgrade | NA           | Yes | Moderate |
| MUI vs CO  | 0.60 (0.01, 1.19)   | Downgrade one level  | Downgrade one level | No downgrade | NA           | Yes | Low      |
| PT vs CO   | 0.47 (0.11, 0.83)   | Downgrade two levels | Downgrade one level | No downgrade | No downgrade | Yes | Very low |
| EX vs MUI  | -0.47 (-1.31, 0.37) | Downgrade one level  | Downgrade one level | No downgrade | NA           | Yes | Low      |
| EX vs PT   | 0.44 (-0.19, 1.08)  | Downgrade two levels | NA                  | No downgrade | NA           | Yes | Low      |
| BA vs EDU  | NA                  | NA                   | NA                  | NA           | NA           | Yes | NA       |
| BA vs EX   | NA                  | NA                   | NA                  | NA           | NA           | Yes | NA       |
| BA vs MUI  | NA                  | NA                   | NA                  | NA           | NA           | Yes | NA       |
| BA vs PT   | NA                  | NA                   | NA                  | NA           | NA           | Yes | NA       |
| BA vs TM   | NA                  | NA                   | NA                  | NA           | NA           | Yes | NA       |
| EDU vs EX  | NA                  | NA                   | NA                  | NA           | NA           | Yes | NA       |
| EDU vs MUI | NA                  | NA                   | NA                  | NA           | NA           | Yes | NA       |
| EDU vs PT  | NA                  | NA                   | NA                  | NA           | NA           | Yes | NA       |
| EDU vs TM  | NA                  | NA                   | NA                  | NA           | NA           | Yes | NA       |
| EX vs TM   | NA                  | NA                   | NA                  | NA           | NA           | Yes | NA       |
| MUI vs PT  | NA                  | NA                   | NA                  | NA           | NA           | Yes | NA       |
| MUI vs TM  | NA                  | NA                   | NA                  | NA           | NA           | Yes | NA       |
| PT vs TM   | NA                  | NA                   | NA                  | NA           | NA           | Yes | NA       |

**Appendix 8. Certainty of evidence ratings on direct evidence of different specific treatments for depression, anxiety, and mental health**

| Comparison        | SMD 95%(CI)         | Risk of bias         | Inconsistency       | Indirectness | Publication bias | Need to assess indirect | Preliminary rating |
|-------------------|---------------------|----------------------|---------------------|--------------|------------------|-------------------------|--------------------|
| <b>Depression</b> |                     |                      |                     |              |                  |                         |                    |
| AT vs AC          | -0.12 (-0.49,0.25)  | Downgrade two levels | No downgrade        | No downgrade | NA               | Yes                     | Low                |
| CBT vs AC         | 0.09 (-0.34,0.51)   | Downgrade two levels | NA                  | No downgrade | NA               | Yes                     | Low                |
| EDU vs AC         | -1.02 (-1.61,-0.43) | Downgrade one level  | NA                  | No downgrade | NA               | Yes                     | Moderate           |
| ES vs AC          | -0.42 (-1.05,0.21)  | Downgrade two levels | NA                  | No downgrade | NA               | Yes                     | Low                |
| Mass vs AC        | -0.55 (-1.18,0.09)  | Downgrade one level  | NA                  | No downgrade | NA               | Yes                     | Moderate           |
| MBT vs AC         | -1.46 (-3.03,0.11)  | Downgrade one level  | Downgrade one level | No downgrade | NA               | Yes                     | Low                |
| ME vs AC          | -0.07 (-0.45,0.32)  | Downgrade two levels | NA                  | No downgrade | NA               | Yes                     | Low                |
| MUI vs AC         | 0.05 (-0.23,0.32)   | Downgrade one level  | No downgrade        | No downgrade | NA               | Yes                     | Moderate           |
| PI vs AC          | -0.43 (-0.82,-0.05) | Downgrade one level  | No downgrade        | No downgrade | NA               | Yes                     | Moderate           |
| AC vs TM          | -0.12 (-1.05,0.80)  | Downgrade two levels | Downgrade one level | No downgrade | NA               | Yes                     | Very low           |
| Acup vs UC        | -0.41 (-0.84,0.01)  | No downgrade         | No downgrade        | No downgrade | NA               | Yes                     | High               |
| AT vs ME          | -0.25 (-1.04,0.54)  | Downgrade one level  | NA                  | No downgrade | NA               | Yes                     | Moderate           |
| AT vs SE          | 0.47 (-0.37,1.31)   | Downgrade one level  | NA                  | No downgrade | NA               | Yes                     | Moderate           |
| AT vs UC          | -0.58 (-1.44,0.27)  | Downgrade one level  | NA                  | No downgrade | NA               | Yes                     | Moderate           |
| CBT vs EDU        | -0.27 (-0.64,0.09)  | Downgrade one level  | NA                  | No downgrade | NA               | Yes                     | Moderate           |
| CBT vs ME         | 0.17 (-0.23,0.57)   | Downgrade two levels | NA                  | No downgrade | NA               | Yes                     | Low                |
| CBT vs MUI        | -0.05 (-0.75,0.65)  | Downgrade two levels | NA                  | No downgrade | NA               | Yes                     | Low                |
| CBT vs PI         | -0.03 (-0.47,0.41)  | Downgrade one level  | Downgrade one level | No downgrade | NA               | Yes                     | Low                |
| CBT vs RT         | 0.36 (-0.39,1.11)   | Downgrade two levels | NA                  | No downgrade | NA               | Yes                     | Low                |
| CBT vs UC         | -0.82 (-1.59,-0.05) | Downgrade one level  | Downgrade one level | No downgrade | NA               | Yes                     | Low                |
| PI vs EDU         | -0.50 (-0.86,-0.13) | Downgrade one level  | NA                  | No downgrade | NA               | Yes                     | Moderate           |
| EDU vs UC         | -0.08 (-0.24,0.08)  | Downgrade one level  | No downgrade        | No downgrade | NA               | Yes                     | Moderate           |
| ES vs KT          | -0.01 (-0.52,0.50)  | Downgrade one level  | NA                  | No downgrade | NA               | Yes                     | Moderate           |
| ES vs UC          | 0.10 (-0.27,0.46)   | Downgrade one level  | No downgrade        | No downgrade | NA               | Yes                     | Moderate           |
| MUI vs KT         | -0.98 (-1.88,-0.09) | Downgrade one level  | NA                  | No downgrade | NA               | Yes                     | Moderate           |
| SE vs KT          | 0.00 (-0.83,0.82)   | Downgrade one level  | NA                  | No downgrade | NA               | Yes                     | Moderate           |
| Mass vs RT        | -0.76 (-1.59,0.08)  | Downgrade one level  | NA                  | No downgrade | NA               | Yes                     | Moderate           |
| Mass vs UC        | -0.54 (-1.07,0.00)  | Downgrade one level  | NA                  | No downgrade | NA               | Yes                     | Moderate           |
| MBT vs UC         | -1.03 (-1.68,-0.37) | Downgrade one level  | Downgrade one level | No downgrade | NA               | Yes                     | Low                |
| MUI vs ME         | -0.26 (-0.64,0.11)  | Downgrade one level  | NA                  | No downgrade | NA               | Yes                     | Moderate           |
| SE vs ME          | -0.65 (-1.52,0.22)  | Downgrade one level  | NA                  | No downgrade | NA               | Yes                     | Moderate           |
| ME vs UC          | -0.34 (0.72,0.04)   | Downgrade one level  | NA                  | No downgrade | NA               | Yes                     | Moderate           |
| Medi vs UC        | -0.36 (-1.27,0.56)  | No downgrade         | Downgrade one level | No downgrade | NA               | Yes                     | Moderate           |
| RT vs MUI         | -0.45 (-1.16,0.26)  | Downgrade two levels | NA                  | No downgrade | NA               | Yes                     | Low                |
| MUI vs SE         | -1.17 (-2.03,-0.31) | Downgrade one level  | NA                  | No downgrade | NA               | Yes                     | Moderate           |
| MUI vs UC         | -0.24 (-0.52,0.04)  | Downgrade two levels | Downgrade one level | No downgrade | NA               | Yes                     | Very low           |
| PI vs UC          | -0.31 (-0.86,0.23)  | Downgrade one level  | NA                  | No downgrade | NA               | Yes                     | Moderate           |
| TM vs UC          | 0.02 (-0.65,0.70)   | Downgrade one level  | NA                  | No downgrade | NA               | Yes                     | Moderate           |
| AC vs Acup        | NA                  | NA                   | NA                  | NA           | NA               | Yes                     | NA                 |
| AC vs KT          | NA                  | NA                   | NA                  | NA           | NA               | Yes                     | NA                 |
| AC vs Medi        | NA                  | NA                   | NA                  | NA           | NA               | Yes                     | NA                 |
| AC vs RT          | NA                  | NA                   | NA                  | NA           | NA               | Yes                     | NA                 |
| AC vs SE          | NA                  | NA                   | NA                  | NA           | NA               | Yes                     | NA                 |
| AC vs UC          | NA                  | NA                   | NA                  | NA           | NA               | Yes                     | NA                 |
| Acup vs AT        | NA                  | NA                   | NA                  | NA           | NA               | Yes                     | NA                 |
| Acup vs CBT       | NA                  | NA                   | NA                  | NA           | NA               | Yes                     | NA                 |
| Acup vs EDU       | NA                  | NA                   | NA                  | NA           | NA               | Yes                     | NA                 |
| Acup vs ES        | NA                  | NA                   | NA                  | NA           | NA               | Yes                     | NA                 |
| Acup vs KT        | NA                  | NA                   | NA                  | NA           | NA               | Yes                     | NA                 |
| Acup vs Mass      | NA                  | NA                   | NA                  | NA           | NA               | Yes                     | NA                 |
| Acup vs MBT       | NA                  | NA                   | NA                  | NA           | NA               | Yes                     | NA                 |
| Acup vs ME        | NA                  | NA                   | NA                  | NA           | NA               | Yes                     | NA                 |
| Acup vs Medi      | NA                  | NA                   | NA                  | NA           | NA               | Yes                     | NA                 |
| Acup vs MUI       | NA                  | NA                   | NA                  | NA           | NA               | Yes                     | NA                 |
| Acup vs PI        | NA                  | NA                   | NA                  | NA           | NA               | Yes                     | NA                 |
| Acup vs RT        | NA                  | NA                   | NA                  | NA           | NA               | Yes                     | NA                 |
| Acup vs SE        | NA                  | NA                   | NA                  | NA           | NA               | Yes                     | NA                 |
| Acup vs TM        | NA                  | NA                   | NA                  | NA           | NA               | Yes                     | NA                 |
| AT vs CBT         | NA                  | NA                   | NA                  | NA           | NA               | Yes                     | NA                 |
| AT vs EDU         | NA                  | NA                   | NA                  | NA           | NA               | Yes                     | NA                 |
| AT vs ES          | NA                  | NA                   | NA                  | NA           | NA               | Yes                     | NA                 |

|              |    |    |    |    |    |     |    |
|--------------|----|----|----|----|----|-----|----|
| AT vs KT     | NA | NA | NA | NA | NA | Yes | NA |
| AT vs Mass   | NA | NA | NA | NA | NA | Yes | NA |
| AT vs MBT    | NA | NA | NA | NA | NA | Yes | NA |
| AT vs Medi   | NA | NA | NA | NA | NA | Yes | NA |
| AT vs MUI    | NA | NA | NA | NA | NA | Yes | NA |
| AT vs PI     | NA | NA | NA | NA | NA | Yes | NA |
| AT vs RT     | NA | NA | NA | NA | NA | Yes | NA |
| AT vs TM     | NA | NA | NA | NA | NA | Yes | NA |
| CBT vs ES    | NA | NA | NA | NA | NA | Yes | NA |
| CBT vs KT    | NA | NA | NA | NA | NA | Yes | NA |
| CBT vs Mass  | NA | NA | NA | NA | NA | Yes | NA |
| CBT vs MBT   | NA | NA | NA | NA | NA | Yes | NA |
| CBT vs Medi  | NA | NA | NA | NA | NA | Yes | NA |
| CBT vs SE    | NA | NA | NA | NA | NA | Yes | NA |
| CBT vs TM    | NA | NA | NA | NA | NA | Yes | NA |
| EDU vs ES    | NA | NA | NA | NA | NA | Yes | NA |
| EDU vs KT    | NA | NA | NA | NA | NA | Yes | NA |
| EDU vs Mass  | NA | NA | NA | NA | NA | Yes | NA |
| EDU vs MBT   | NA | NA | NA | NA | NA | Yes | NA |
| EDU vs ME    | NA | NA | NA | NA | NA | Yes | NA |
| EDU vs Medi  | NA | NA | NA | NA | NA | Yes | NA |
| EDU vs MUI   | NA | NA | NA | NA | NA | Yes | NA |
| EDU vs RT    | NA | NA | NA | NA | NA | Yes | NA |
| EDU vs SE    | NA | NA | NA | NA | NA | Yes | NA |
| EDU vs TM    | NA | NA | NA | NA | NA | Yes | NA |
| ES vs Mass   | NA | NA | NA | NA | NA | Yes | NA |
| ES vs MBT    | NA | NA | NA | NA | NA | Yes | NA |
| ES vs ME     | NA | NA | NA | NA | NA | Yes | NA |
| ES vs Medi   | NA | NA | NA | NA | NA | Yes | NA |
| ES vs MUI    | NA | NA | NA | NA | NA | Yes | NA |
| ES vs PI     | NA | NA | NA | NA | NA | Yes | NA |
| ES vs RT     | NA | NA | NA | NA | NA | Yes | NA |
| ES vs SE     | NA | NA | NA | NA | NA | Yes | NA |
| ES vs TM     | NA | NA | NA | NA | NA | Yes | NA |
| KT vs Mass   | NA | NA | NA | NA | NA | Yes | NA |
| KT vs MBT    | NA | NA | NA | NA | NA | Yes | NA |
| KT vs ME     | NA | NA | NA | NA | NA | Yes | NA |
| KT vs Medi   | NA | NA | NA | NA | NA | Yes | NA |
| KT vs PI     | NA | NA | NA | NA | NA | Yes | NA |
| KT vs RT     | NA | NA | NA | NA | NA | Yes | NA |
| KT vs TM     | NA | NA | NA | NA | NA | Yes | NA |
| KT vs UC     | NA | NA | NA | NA | NA | Yes | NA |
| Mass vs MBT  | NA | NA | NA | NA | NA | Yes | NA |
| Mass vs ME   | NA | NA | NA | NA | NA | Yes | NA |
| Mass vs Medi | NA | NA | NA | NA | NA | Yes | NA |
| Mass vs MUI  | NA | NA | NA | NA | NA | Yes | NA |
| Mass vs PI   | NA | NA | NA | NA | NA | Yes | NA |
| Mass vs SE   | NA | NA | NA | NA | NA | Yes | NA |
| Mass vs TM   | NA | NA | NA | NA | NA | Yes | NA |
| MBT vs ME    | NA | NA | NA | NA | NA | Yes | NA |
| MBT vs Medi  | NA | NA | NA | NA | NA | Yes | NA |
| MBT vs MUI   | NA | NA | NA | NA | NA | Yes | NA |
| MBT vs PI    | NA | NA | NA | NA | NA | Yes | NA |
| MBT vs RT    | NA | NA | NA | NA | NA | Yes | NA |
| MBT vs SE    | NA | NA | NA | NA | NA | Yes | NA |
| MBT vs TM    | NA | NA | NA | NA | NA | Yes | NA |
| ME vs Medi   | NA | NA | NA | NA | NA | Yes | NA |
| ME vs PI     | NA | NA | NA | NA | NA | Yes | NA |
| ME vs RT     | NA | NA | NA | NA | NA | Yes | NA |
| ME vs TM     | NA | NA | NA | NA | NA | Yes | NA |
| Medi vs MUI  | NA | NA | NA | NA | NA | Yes | NA |
| Medi vs PI   | NA | NA | NA | NA | NA | Yes | NA |
| Medi vs RT   | NA | NA | NA | NA | NA | Yes | NA |
| Medi vs SE   | NA | NA | NA | NA | NA | Yes | NA |
| Medi vs TM   | NA | NA | NA | NA | NA | Yes | NA |
| MUI vs PI    | NA | NA | NA | NA | NA | Yes | NA |
| MUI vs TM    | NA | NA | NA | NA | NA | Yes | NA |

|          |    |    |    |    |    |     |    |
|----------|----|----|----|----|----|-----|----|
| PI vs RT | NA | NA | NA | NA | NA | Yes | NA |
| PI vs SE | NA | NA | NA | NA | NA | Yes | NA |
| PI vs TM | NA | NA | NA | NA | NA | Yes | NA |
| RT vs SE | NA | NA | NA | NA | NA | Yes | NA |
| RT vs TM | NA | NA | NA | NA | NA | Yes | NA |
| RT vs UC | NA | NA | NA | NA | NA | Yes | NA |
| SE vs TM | NA | NA | NA | NA | NA | Yes | NA |
| SE vs UC | NA | NA | NA | NA | NA | Yes | NA |

**Anxiety**

|             |                     |                      |                     |              |    |     |          |
|-------------|---------------------|----------------------|---------------------|--------------|----|-----|----------|
| CBT vs AC   | -0.08 (-0.50,0.35)  | Downgrade two levels | NA                  | No downgrade | NA | Yes | Low      |
| EDU vs AC   | -0.74 (-1.31,-0.16) | Downgrade one level  | NA                  | No downgrade | NA | Yes | Moderate |
| MBT vs AC   | -1.34 (-1.69,-0.99) | Downgrade one level  | No downgrade        | No downgrade | NA | Yes | Moderate |
| ME vs AC    | -0.12 (-0.50,0.27)  | Downgrade two levels | NA                  | No downgrade | NA | Yes | Low      |
| MUI vs AC   | -0.20 (-0.58,0.17)  | Downgrade one level  | NA                  | No downgrade | NA | Yes | Moderate |
| PI vs AC    | -0.27 (-0.73,0.18)  | Downgrade one level  | NA                  | No downgrade | NA | Yes | Moderate |
| AC vs TM    | -0.13 (-0.78,0.52)  | Downgrade one level  | NA                  | No downgrade | NA | Yes | Moderate |
| CBT vs EDU  | -0.20 (-0.56,0.17)  | Downgrade one level  | NA                  | No downgrade | NA | Yes | Moderate |
| CBT vs ME   | 0.04 (-0.36,0.43)   | Downgrade two levels | NA                  | No downgrade | NA | Yes | Low      |
| CBT vs PI   | 0.19 (-0.14,0.51)   | Downgrade one level  | No downgrade        | No downgrade | NA | Yes | Moderate |
| CBT vs UC   | -1.38 (-3.32,0.56)  | Downgrade one level  | Downgrade one level | No downgrade | NA | Yes | Low      |
| PI vs EDU   | -0.38 (-0.74,-0.02) | Downgrade one level  | NA                  | No downgrade | NA | Yes | Moderate |
| EDU vs UC   | -0.46 (-1.24,0.32)  | Downgrade one level  | Downgrade one level | No downgrade | NA | Yes | Low      |
| ES vs KT    | 0.05 (-0.47,0.56)   | Downgrade one level  | NA                  | No downgrade | NA | Yes | Moderate |
| UC vs ES    | -0.19 (-1.05,0.67)  | Downgrade one level  | NA                  | No downgrade | NA | Yes | Moderate |
| MUI vs KT   | -1.53 (-2.51,-0.55) | Downgrade one level  | NA                  | No downgrade | NA | Yes | Moderate |
| MBT vs UC   | -1.33 (-2.13,-0.53) | Downgrade one level  | NA                  | No downgrade | NA | Yes | Moderate |
| MUI vs ME   | -0.31 (-0.68,0.06)  | Downgrade one level  | NA                  | No downgrade | NA | Yes | Moderate |
| ME vs UC    | -1.33 (-2.13,-0.53) | Downgrade one level  | NA                  | No downgrade | NA | Yes | Moderate |
| Medi vs UC  | -0.41 (-1.43,0.61)  | No downgrade         | Downgrade one level | No downgrade | NA | Yes | Moderate |
| MUI vs UC   | -0.51 (-0.78,-0.24) | Downgrade one level  | No downgrade        | No downgrade | NA | Yes | Moderate |
| PI vs UC    | 0.00 (-0.54,0.54)   | Downgrade one level  | NA                  | No downgrade | NA | Yes | Moderate |
| TM vs UC    | -0.20 (-0.88,0.47)  | Downgrade one level  | NA                  | No downgrade | NA | Yes | Moderate |
| AC vs ES    | NA                  | NA                   | NA                  | NA           | NA | Yes | NA       |
| AC vs KT    | NA                  | NA                   | NA                  | NA           | NA | Yes | NA       |
| AC vs Medi  | NA                  | NA                   | NA                  | NA           | NA | Yes | NA       |
| AC vs UC    | NA                  | NA                   | NA                  | NA           | NA | Yes | NA       |
| CBT vs ES   | NA                  | NA                   | NA                  | NA           | NA | Yes | NA       |
| CBT vs KT   | NA                  | NA                   | NA                  | NA           | NA | Yes | NA       |
| CBT vs MBT  | NA                  | NA                   | NA                  | NA           | NA | Yes | NA       |
| CBT vs Medi | NA                  | NA                   | NA                  | NA           | NA | Yes | NA       |
| CBT vs MUI  | NA                  | NA                   | NA                  | NA           | NA | Yes | NA       |
| CBT vs TM   | NA                  | NA                   | NA                  | NA           | NA | Yes | NA       |
| EDU vs ES   | NA                  | NA                   | NA                  | NA           | NA | Yes | NA       |
| EDU vs KT   | NA                  | NA                   | NA                  | NA           | NA | Yes | NA       |
| EDU vs MBT  | NA                  | NA                   | NA                  | NA           | NA | Yes | NA       |
| EDU vs ME   | NA                  | NA                   | NA                  | NA           | NA | Yes | NA       |
| EDU vs Medi | NA                  | NA                   | NA                  | NA           | NA | Yes | NA       |
| EDU vs MUI  | NA                  | NA                   | NA                  | NA           | NA | Yes | NA       |
| EDU vs TM   | NA                  | NA                   | NA                  | NA           | NA | Yes | NA       |
| ES vs MBT   | NA                  | NA                   | NA                  | NA           | NA | Yes | NA       |
| ES vs ME    | NA                  | NA                   | NA                  | NA           | NA | Yes | NA       |
| ES vs Medi  | NA                  | NA                   | NA                  | NA           | NA | Yes | NA       |
| ES vs MUI   | NA                  | NA                   | NA                  | NA           | NA | Yes | NA       |
| ES vs PI    | NA                  | NA                   | NA                  | NA           | NA | Yes | NA       |
| ES vs TM    | NA                  | NA                   | NA                  | NA           | NA | Yes | NA       |
| KT vs MBT   | NA                  | NA                   | NA                  | NA           | NA | Yes | NA       |
| KT vs ME    | NA                  | NA                   | NA                  | NA           | NA | Yes | NA       |
| KT vs Medi  | NA                  | NA                   | NA                  | NA           | NA | Yes | NA       |
| KT vs PI    | NA                  | NA                   | NA                  | NA           | NA | Yes | NA       |
| KT vs TM    | NA                  | NA                   | NA                  | NA           | NA | Yes | NA       |
| KT vs UC    | NA                  | NA                   | NA                  | NA           | NA | Yes | NA       |
| MBT vs ME   | NA                  | NA                   | NA                  | NA           | NA | Yes | NA       |
| MBT vs Medi | NA                  | NA                   | NA                  | NA           | NA | Yes | NA       |
| MBT vs MUI  | NA                  | NA                   | NA                  | NA           | NA | Yes | NA       |
| MBT vs PI   | NA                  | NA                   | NA                  | NA           | NA | Yes | NA       |
| MBT vs TM   | NA                  | NA                   | NA                  | NA           | NA | Yes | NA       |
| ME vs Medi  | NA                  | NA                   | NA                  | NA           | NA | Yes | NA       |

|                      |                    |                      |                     |              |    |     |          |
|----------------------|--------------------|----------------------|---------------------|--------------|----|-----|----------|
| ME vs PI             | NA                 | NA                   | NA                  | NA           | NA | Yes | NA       |
| ME vs TM             | NA                 | NA                   | NA                  | NA           | NA | Yes | NA       |
| Medi vs MUI          | NA                 | NA                   | NA                  | NA           | NA | Yes | NA       |
| Medi vs PI           | NA                 | NA                   | NA                  | NA           | NA | Yes | NA       |
| Medi vs TM           | NA                 | NA                   | NA                  | NA           | NA | Yes | NA       |
| MUI vs PI            | NA                 | NA                   | NA                  | NA           | NA | Yes | NA       |
| MUI vs TM            | NA                 | NA                   | NA                  | NA           | NA | Yes | NA       |
| PI vs TM             | NA                 | NA                   | NA                  | NA           | NA | Yes | NA       |
| <b>Mental health</b> |                    |                      |                     |              |    |     |          |
| AT vs AC             | 1.03 (0.03,2.02)   | Downgrade one level  | Downgrade one level | No downgrade | NA | Yes | Low      |
| EDU vs AC            | 0.57 (-0.01,1.14)  | Downgrade two levels | NA                  | No downgrade | NA | Yes | Low      |
| TM vs AC             | 0.59 (-1.05,2.23)  | Downgrade one level  | Downgrade one level | No downgrade | NA | Yes | Low      |
| MUI vs AT            | 0.02 (-0.54,0.58)  | Downgrade two levels | NA                  | No downgrade | NA | Yes | Low      |
| AT vs UC             | -0.04 (-0.61,0.53) | Downgrade two levels | NA                  | No downgrade | NA | Yes | Low      |
| EDU vs UC            | 0.24 (-0.26,0.73)  | Downgrade one level  | Downgrade one level | No downgrade | NA | Yes | Low      |
| Medi vs UC           | 0.43 (-0.29,1.14)  | No downgrade         | Downgrade one level | No downgrade | NA | Yes | Moderate |
| MUI vs UC            | 0.60 (0.01,1.19)   | Downgrade one level  | Downgrade one level | No downgrade | NA | Yes | Low      |
| TM vs UC             | 0.02 (-0.66,0.69)  | Downgrade one level  | NA                  | No downgrade | NA | Yes | Moderate |
| AC vs Medi           | NA                 | NA                   | NA                  | NA           | NA | Yes | NA       |
| AC vs MUI            | NA                 | NA                   | NA                  | NA           | NA | Yes | NA       |
| AC vs UC             | NA                 | NA                   | NA                  | NA           | NA | Yes | NA       |
| AT vs EDU            | NA                 | NA                   | NA                  | NA           | NA | Yes | NA       |
| AT vs Medi           | NA                 | NA                   | NA                  | NA           | NA | Yes | NA       |
| AT vs TM             | NA                 | NA                   | NA                  | NA           | NA | Yes | NA       |
| EDU vs Medi          | NA                 | NA                   | NA                  | NA           | NA | Yes | NA       |
| EDU vs MUI           | NA                 | NA                   | NA                  | NA           | NA | Yes | NA       |
| EDU vs TM            | NA                 | NA                   | NA                  | NA           | NA | Yes | NA       |
| Medi vs MUI          | NA                 | NA                   | NA                  | NA           | NA | Yes | NA       |
| Medi vs TM           | NA                 | NA                   | NA                  | NA           | NA | Yes | NA       |
| MUI vs TM            | NA                 | NA                   | NA                  | NA           | NA | Yes | NA       |

Appendix 9. Certainty of evidence ratings on indirect and network evidence of different categories of interventions for depression

| Comparison               | Within-study bias | Reporting bias | Indirectness | Imprecision    | Heterogeneity  | Incoherence   | Confidence rating |
|--------------------------|-------------------|----------------|--------------|----------------|----------------|---------------|-------------------|
| <b>Mixed evidence</b>    |                   |                |              |                |                |               |                   |
| BA vs CO                 | Some concerns     | Low risk       | No concerns  | No concerns    | Major concerns | No concerns   | Very low          |
| BA vs EDU                | No concerns       | Some concerns  | No concerns  | Some concerns  | No concerns    | No concerns   | Low               |
| BA vs EX                 | Major concerns    | Some concerns  | No concerns  | Some concerns  | Some concerns  | No concerns   | Very low          |
| BA vs MUI                | Major concerns    | Some concerns  | No concerns  | Major concerns | No concerns    | No concerns   | Very low          |
| CO vs EDU                | Major concerns    | Low risk       | No concerns  | Some concerns  | Some concerns  | No concerns   | Very low          |
| CO vs EX                 | Major concerns    | Low risk       | No concerns  | Some concerns  | Some concerns  | No concerns   | Very low          |
| CO vs MBT                | Some concerns     | Low risk       | No concerns  | No concerns    | No concerns    | No concerns   | Moderate          |
| CO vs MUI                | Major concerns    | Low risk       | No concerns  | Some concerns  | Some concerns  | No concerns   | Very low          |
| CO vs PT                 | Some concerns     | Low risk       | No concerns  | No concerns    | Major concerns | No concerns   | Very low          |
| CO vs TM                 | Some concerns     | Low risk       | No concerns  | Major concerns | No concerns    | No concerns   | Very low          |
| EX vs MUI                | Major concerns    | Low risk       | No concerns  | Major concerns | No concerns    | No concerns   | Very low          |
| EX vs PT                 | Some concerns     | Low risk       | No concerns  | Major concerns | No concerns    | No concerns   | Very low          |
| MUI vs PT                | Some concerns     | Some concerns  | No concerns  | Major concerns | No concerns    | Some concerns | Very low          |
| <b>Indirect evidence</b> |                   |                |              |                |                |               |                   |
| BA vs MBT                | Some concerns     | Low risk       | No concerns  | No concerns    | Some concerns  | No concerns   | Low               |
| BA vs PT                 | Some concerns     | Low risk       | No concerns  | Some concerns  | Some concerns  | No concerns   | Very low          |
| BA vs TM                 | Some concerns     | Some concerns  | No concerns  | Some concerns  | Some concerns  | No concerns   | Very low          |
| EDU vs EX                | Major concerns    | Low risk       | No concerns  | Major concerns | No concerns    | No concerns   | Very low          |
| EDU vs MBT               | Some concerns     | Low risk       | No concerns  | No concerns    | No concerns    | No concerns   | Moderate          |
| EDU vs MUI               | Major concerns    | Low risk       | No concerns  | Major concerns | No concerns    | No concerns   | Very low          |
| EDU vs PT                | Major concerns    | Low risk       | No concerns  | Major concerns | No concerns    | No concerns   | Very low          |
| EDU vs TM                | Some concerns     | Some concerns  | No concerns  | Major concerns | No concerns    | No concerns   | Very low          |
| EX vs MBT                | Some concerns     | Low risk       | No concerns  | No concerns    | No concerns    | No concerns   | Moderate          |
| EX vs TM                 | Some concerns     | Some concerns  | No concerns  | Major concerns | No concerns    | No concerns   | Very low          |
| MBT vs MUI               | Some concerns     | Low risk       | No concerns  | No concerns    | No concerns    | No concerns   | Moderate          |
| MBT vs PT                | Some concerns     | Low risk       | No concerns  | No concerns    | No concerns    | No concerns   | Moderate          |
| MBT vs TM                | Some concerns     | Some concerns  | No concerns  | No concerns    | No concerns    | No concerns   | Low               |
| MUI vs TM                | Some concerns     | Some concerns  | No concerns  | Major concerns | No concerns    | No concerns   | Very low          |
| PT vs TM                 | Some concerns     | Some concerns  | No concerns  | Some concerns  | No concerns    | No concerns   | Very low          |



Appendix 10. Certainty of evidence ratings on indirect and network evidence of different categories of interventions for anxiety

| Comparison               | Within-study bias | Reporting bias | Indirectness | Imprecision    | Heterogeneity  | Incoherence   | Confidence rating |
|--------------------------|-------------------|----------------|--------------|----------------|----------------|---------------|-------------------|
| <b>Mixed evidence</b>    |                   |                |              |                |                |               |                   |
| BA vs CO                 | Some concerns     | Low risk       | No concerns  | No concerns    | Major concerns | No concerns   | Very low          |
| BA vs EDU                | No concerns       | Some concerns  | No concerns  | Major concerns | No concerns    | No concerns   | Very low          |
| BA vs EX                 | Major concerns    | Some concerns  | No concerns  | Some concerns  | Some concerns  | No concerns   | Very low          |
| CO vs EDU                | Some concerns     | Low risk       | No concerns  | No concerns    | Major concerns | No concerns   | Very low          |
| CO vs EX                 | Major concerns    | Low risk       | No concerns  | Major concerns | No concerns    | No concerns   | Very low          |
| CO vs MBT                | Some concerns     | Low risk       | No concerns  | No concerns    | No concerns    | No concerns   | Moderate          |
| CO vs MUI                | Some concerns     | Low risk       | No concerns  | No concerns    | Major concerns | No concerns   | Very low          |
| CO vs PT                 | Some concerns     | Low risk       | No concerns  | Major concerns | No concerns    | No concerns   | Very low          |
| CO vs TM                 | Some concerns     | Low risk       | No concerns  | Major concerns | No concerns    | No concerns   | Very low          |
| EX vs MUI                | No concerns       | Low risk       | No concerns  | Some concerns  | Some concerns  | No concerns   | Low               |
| EX vs PT                 | Some concerns     | Low risk       | No concerns  | Major concerns | No concerns    | Some concerns | Very low          |
| MUI vs PT                | Some concerns     | Some concerns  | No concerns  | Some concerns  | Some concerns  | No concerns   | Very low          |
| <b>Indirect evidence</b> |                   |                |              |                |                |               |                   |
| BA vs MBT                | Some concerns     | Low risk       | No concerns  | No concerns    | Some concerns  | No concerns   | Low               |
| BA vs MUI                | Some concerns     | Low risk       | No concerns  | Major concerns | No concerns    | No concerns   | Very low          |
| BA vs PT                 | Some concerns     | Some concerns  | No concerns  | Some concerns  | Some concerns  | No concerns   | Very low          |
| BA vs TM                 | Some concerns     | Some concerns  | No concerns  | Major concerns | No concerns    | No concerns   | Very low          |
| EDU vs EX                | Major concerns    | Low risk       | No concerns  | Major concerns | No concerns    | No concerns   | Very low          |
| EDU vs MBT               | Some concerns     | Low risk       | No concerns  | No concerns    | Some concerns  | No concerns   | Low               |
| EDU vs MUI               | Some concerns     | Low risk       | No concerns  | Major concerns | No concerns    | No concerns   | Very low          |
| EDU vs PT                | Some concerns     | Some concerns  | No concerns  | Some concerns  | Some concerns  | No concerns   | Very low          |
| EDU vs TM                | Some concerns     | Some concerns  | No concerns  | Major concerns | No concerns    | No concerns   | Very low          |
| EX vs MBT                | Some concerns     | Low risk       | No concerns  | No concerns    | No concerns    | No concerns   | Moderate          |
| EX vs TM                 | Some concerns     | Some concerns  | No concerns  | Major concerns | No concerns    | No concerns   | Very low          |
| MBT vs MUI               | Some concerns     | Low risk       | No concerns  | No concerns    | Some concerns  | No concerns   | Low               |
| MBT vs PT                | Some concerns     | Some concerns  | No concerns  | No concerns    | No concerns    | No concerns   | Low               |
| MBT vs TM                | Some concerns     | Some concerns  | No concerns  | No concerns    | No concerns    | No concerns   | Low               |
| MUI vs TM                | Some concerns     | Some concerns  | No concerns  | Major concerns | No concerns    | No concerns   | Very low          |
| PT vs TM                 | Some concerns     | Some concerns  | No concerns  | Major concerns | No concerns    | No concerns   | Very low          |

Appendix 11. Certainty of evidence ratings on indirect and network evidence of different categories of interventions for mental health

| Comparison               | Within-study bias | Reporting bias | Indirectness | Imprecision    | Heterogeneity  | Incoherence   | Confidence rating |
|--------------------------|-------------------|----------------|--------------|----------------|----------------|---------------|-------------------|
| <b>Mixed evidence</b>    |                   |                |              |                |                |               |                   |
| BA vs CO                 | Some concerns     | Low risk       | No concerns  | Major concerns | No concerns    | No concerns   | Very low          |
| CO vs EDU                | Major concerns    | Low risk       | No concerns  | Major concerns | No concerns    | No concerns   | Very low          |
| CO vs EX                 | No concerns       | Low risk       | No concerns  | No concerns    | Major concerns | No concerns   | Low               |
| CO vs MUI                | No concerns       | Low risk       | No concerns  | No concerns    | Major concerns | Some concerns | Very low          |
| CO vs PT                 | Major concerns    | Low risk       | No concerns  | No concerns    | Major concerns | No concerns   | Very low          |
| CO vs TM                 | Some concerns     | Low risk       | No concerns  | Major concerns | No concerns    | No concerns   | Very low          |
| EX vs MUI                | No concerns       | Low risk       | No concerns  | Major concerns | No concerns    | No concerns   | Low               |
| EX vs PT                 | Major concerns    | Some concerns  | No concerns  | Major concerns | No concerns    | No concerns   | Very low          |
| <b>Indirect evidence</b> |                   |                |              |                |                |               |                   |
| BA vs EDU                | Some concerns     | Some concerns  | No concerns  | Major concerns | No concerns    | No concerns   | Very low          |
| BA vs EX                 | Some concerns     | Some concerns  | No concerns  | Major concerns | No concerns    | No concerns   | Very low          |
| BA vs MUI                | Some concerns     | Some concerns  | No concerns  | Major concerns | No concerns    | No concerns   | Very low          |
| BA vs PT                 | Some concerns     | Some concerns  | No concerns  | Major concerns | No concerns    | No concerns   | Very low          |
| BA vs TM                 | Some concerns     | Some concerns  | No concerns  | Major concerns | No concerns    | No concerns   | Very low          |
| EDU vs EX                | Major concerns    | Low risk       | No concerns  | Major concerns | No concerns    | No concerns   | Very low          |
| EDU vs MUI               | Major concerns    | Low risk       | No concerns  | Major concerns | No concerns    | No concerns   | Very low          |
| EDU vs PT                | Major concerns    | Low risk       | No concerns  | Major concerns | No concerns    | No concerns   | Very low          |
| EDU vs TM                | Some concerns     | Some concerns  | No concerns  | Major concerns | No concerns    | No concerns   | Very low          |
| EX vs TM                 | Some concerns     | Some concerns  | No concerns  | Major concerns | No concerns    | No concerns   | Very low          |
| MUI vs PT                | Major concerns    | Low risk       | No concerns  | Major concerns | No concerns    | No concerns   | Very low          |
| MUI vs TM                | Some concerns     | Some concerns  | No concerns  | Major concerns | No concerns    | No concerns   | Very low          |
| PT vs TM                 | Some concerns     | Some concerns  | No concerns  | Major concerns | No concerns    | No concerns   | Very low          |

Appendix 12. Certainty of evidence ratings on indirect and network evidence of different specific treatments for depression

| Comparison               | Within-study bias | Reporting bias | Indirectness  | Imprecision    | Heterogeneity  | Incoherence   | Confidence rating |
|--------------------------|-------------------|----------------|---------------|----------------|----------------|---------------|-------------------|
| <b>Mixed evidence</b>    |                   |                |               |                |                |               |                   |
| AC vs AT                 | Major concerns    | Low risk       | No concerns   | Major concerns | No concerns    | No concerns   | Very low          |
| AC vs CBT                | Major concerns    | Some concerns  | No concerns   | No concerns    | Major concerns | No concerns   | Very low          |
| AC vs EDU                | Some concerns     | Some concerns  | No concerns   | Major concerns | No concerns    | Some concerns | Very low          |
| AC vs ES                 | Major concerns    | Some concerns  | No concerns   | Major concerns | No concerns    | No concerns   | Very low          |
| AC vs MBT                | Some concerns     | Low risk       | No concerns   | Low risk       | No concerns    | No concerns   | Low               |
| AC vs ME                 | Major concerns    | Some concerns  | No concerns   | Major concerns | No concerns    | No concerns   | Very low          |
| AC vs MUI                | Some concerns     | Low risk       | No concerns   | Some concerns  | Some concerns  | No concerns   | Very low          |
| AC vs Mass               | Some concerns     | Some concerns  | No concerns   | No concerns    | Major concerns | No concerns   | Very low          |
| AC vs PI                 | No concerns       | Low risk       | No concerns   | Some concerns  | Some concerns  | No concerns   | Low               |
| AC vs TM                 | Some concerns     | Low risk       | No concerns   | Major concerns | No concerns    | No concerns   | Very low          |
| AT vs ME                 | Some concerns     | Some concerns  | No concerns   | Major concerns | No concerns    | No concerns   | Very low          |
| AT vs SE                 | Some concerns     | Some concerns  | Some concerns | Major concerns | No concerns    | No concerns   | Very low          |
| AT vs UC                 | Some concerns     | Some concerns  | No concerns   | Major concerns | No concerns    | No concerns   | Very low          |
| Acup vs UC               | No concerns       | Low risk       | No concerns   | Major concerns | No concerns    | No concerns   | Low               |
| CBT vs EDU               | No concerns       | Some concerns  | No concerns   | Major concerns | No concerns    | No concerns   | Very low          |
| CBT vs ME                | Major concerns    | Some concerns  | No concerns   | Major concerns | No concerns    | No concerns   | Very low          |
| CBT vs MUI               | Major concerns    | Some concerns  | No concerns   | Major concerns | No concerns    | No concerns   | Very low          |
| CBT vs PI                | Some concerns     | Low risk       | No concerns   | Major concerns | No concerns    | No concerns   | Very low          |
| CBT vs RT                | Major concerns    | Some concerns  | No concerns   | Major concerns | No concerns    | No concerns   | Very low          |
| CBT vs UC                | Some concerns     | Low risk       | No concerns   | No concerns    | Major concerns | No concerns   | Very low          |
| EDU vs PI                | No concerns       | Some concerns  | No concerns   | Major concerns | No concerns    | No concerns   | Very low          |
| EDU vs UC                | Major concerns    | Low risk       | No concerns   | Some concerns  | Some concerns  | No concerns   | Very low          |
| ES vs KT                 | Some concerns     | Some concerns  | No concerns   | Major concerns | No concerns    | No concerns   | Very low          |
| ES vs UC                 | Some concerns     | Low risk       | No concerns   | Major concerns | No concerns    | No concerns   | Very low          |
| KT vs MUI                | Some concerns     | Some concerns  | No concerns   | Major concerns | No concerns    | No concerns   | Very low          |
| KT vs SE                 | Some concerns     | Some concerns  | No concerns   | Major concerns | No concerns    | No concerns   | Very low          |
| MBT vs UC                | Some concerns     | Low risk       | No concerns   | Low risk       | No concerns    | No concerns   | Low               |
| ME vs MUI                | No concerns       | Some concerns  | No concerns   | Major concerns | No concerns    | No concerns   | Very low          |
| ME vs SE                 | Some concerns     | Some concerns  | No concerns   | Major concerns | No concerns    | No concerns   | Very low          |
| ME vs UC                 | No concerns       | Some concerns  | No concerns   | Major concerns | No concerns    | No concerns   | Very low          |
| MUI vs RT                | Major concerns    | Some concerns  | No concerns   | Major concerns | No concerns    | No concerns   | Very low          |
| MUI vs SE                | Some concerns     | Some concerns  | No concerns   | Major concerns | No concerns    | Some concerns | Very low          |
| MUI vs UC                | Major concerns    | Low risk       | No concerns   | Some concerns  | Some concerns  | No concerns   | Very low          |
| Mass vs RT               | Some concerns     | Some concerns  | No concerns   | Major concerns | No concerns    | No concerns   | Very low          |
| Mass vs UC               | Some concerns     | Some concerns  | No concerns   | No concerns    | Major concerns | No concerns   | Very low          |
| Medi vs UC               | Some concerns     | Low risk       | No concerns   | Major concerns | No concerns    | No concerns   | Very low          |
| PI vs UC                 | Some concerns     | Some concerns  | No concerns   | Some concerns  | Some concerns  | No concerns   | Very low          |
| TM vs UC                 | Some concerns     | Some concerns  | No concerns   | Major concerns | No concerns    | No concerns   | Very low          |
| <b>Indirect evidence</b> |                   |                |               |                |                |               |                   |
| AC vs Acup               | Some concerns     | Low risk       | No concerns   | Major concerns | No concerns    | No concerns   | Very low          |
| AC vs KT                 | Some concerns     | Low risk       | No concerns   | Major concerns | No concerns    | No concerns   | Very low          |
| AC vs Medi               | Some concerns     | Low risk       | No concerns   | Major concerns | No concerns    | No concerns   | Very low          |
| AC vs RT                 | Major concerns    | Low risk       | No concerns   | Major concerns | No concerns    | No concerns   | Very low          |
| AC vs SE                 | Some concerns     | Low risk       | No concerns   | Major concerns | No concerns    | No concerns   | Very low          |
| AC vs UC                 | Some concerns     | Low risk       | No concerns   | Major concerns | No concerns    | No concerns   | Very low          |
| Acup vs AT               | Some concerns     | Low risk       | No concerns   | Major concerns | No concerns    | No concerns   | Very low          |
| AT vs CBT                | Some concerns     | Low risk       | No concerns   | Major concerns | No concerns    | No concerns   | Very low          |
| AT vs EDU                | Some concerns     | Low risk       | No concerns   | Major concerns | No concerns    | No concerns   | Very low          |
| AT vs ES                 | Some concerns     | Low risk       | No concerns   | Major concerns | No concerns    | No concerns   | Very low          |
| AT vs KT                 | Some concerns     | Some concerns  | No concerns   | Major concerns | No concerns    | No concerns   | Very low          |
| AT vs MBT                | Some concerns     | Low risk       | No concerns   | No concerns    | Some concerns  | No concerns   | Low               |
| AT vs MUI                | Some concerns     | Low risk       | No concerns   | Major concerns | No concerns    | No concerns   | Very low          |
| AT vs Mass               | Some concerns     | Low risk       | No concerns   | Major concerns | No concerns    | No concerns   | Very low          |
| AT vs Medi               | Some concerns     | Low risk       | No concerns   | Major concerns | No concerns    | No concerns   | Very low          |
| AT vs PI                 | Some concerns     | Low risk       | No concerns   | Major concerns | No concerns    | No concerns   | Very low          |
| AT vs RT                 | Some concerns     | Some concerns  | No concerns   | Major concerns | No concerns    | No concerns   | Very low          |
| AT vs TM                 | Some concerns     | Low risk       | No concerns   | Major concerns | No concerns    | No concerns   | Very low          |
| Acup vs CBT              | Some concerns     | Low risk       | No concerns   | Major concerns | No concerns    | No concerns   | Very low          |
| Acup vs EDU              | Some concerns     | Low risk       | No concerns   | Major concerns | No concerns    | No concerns   | Very low          |
| Acup vs ES               | Some concerns     | Low risk       | No concerns   | Major concerns | No concerns    | No concerns   | Very low          |
| Acup vs KT               | Some concerns     | Low risk       | No concerns   | Major concerns | No concerns    | No concerns   | Very low          |



|            |                |               |             |                |             |             |          |
|------------|----------------|---------------|-------------|----------------|-------------|-------------|----------|
| Medi vs TM | Some concerns  | Low risk      | No concerns | Major concerns | No concerns | No concerns | Very low |
| PI vs RT   | Major concerns | Some concerns | No concerns | Major concerns | No concerns | No concerns | Very low |
| PI vs SE   | Some concerns  | Some concerns | No concerns | Major concerns | No concerns | No concerns | Very low |
| PI vs TM   | Some concerns  | Low risk      | No concerns | Major concerns | No concerns | No concerns | Very low |
| RT vs SE   | Some concerns  | Some concerns | No concerns | Major concerns | No concerns | No concerns | Very low |
| RT vs TM   | Some concerns  | Some concerns | No concerns | Major concerns | No concerns | No concerns | Very low |
| RT vs UC   | Major concerns | Some concerns | No concerns | Major concerns | No concerns | No concerns | Very low |
| SE vs TM   | Some concerns  | Some concerns | No concerns | Major concerns | No concerns | No concerns | Very low |
| SE vs UC   | Some concerns  | Some concerns | No concerns | Major concerns | No concerns | No concerns | Very low |

---

Appendix 13. Certainty of evidence ratings on indirect and network evidence of different specific treatments for anxiety

| Comparison               | Within-study bias | Reporting bias | Indirectness | Imprecision    | Heterogeneity  | Incoherence    | Confidence rating |
|--------------------------|-------------------|----------------|--------------|----------------|----------------|----------------|-------------------|
| <b>Mixed evidence</b>    |                   |                |              |                |                |                |                   |
| AC vs CBT                | Major concerns    | Some concerns  | No concerns  | Some concerns  | Some concerns  | No concerns    | Very low          |
| AC vs EDU                | Some concerns     | Some concerns  | No concerns  | Major concerns | No concerns    | No concerns    | Very low          |
| AC vs MBT                | Some concerns     | Low risk       | No concerns  | No concerns    | No concerns    | No concerns    | Moderate          |
| AC vs ME                 | Major concerns    | Some concerns  | No concerns  | Major concerns | No concerns    | No concerns    | Very low          |
| AC vs MUI                | Some concerns     | Some concerns  | No concerns  | Some concerns  | Some concerns  | No concerns    | Very low          |
| AC vs PI                 | No concerns       | Some concerns  | No concerns  | Some concerns  | Some concerns  | No concerns    | Very low          |
| AC vs TM                 | Some concerns     | Some concerns  | No concerns  | Major concerns | No concerns    | No concerns    | Very low          |
| CBT vs EDU               | No concerns       | Some concerns  | No concerns  | Major concerns | No concerns    | No concerns    | Very low          |
| CBT vs ME                | Major concerns    | Some concerns  | No concerns  | Major concerns | No concerns    | No concerns    | Very low          |
| CBT vs PI                | No concerns       | Low risk       | No concerns  | Major concerns | No concerns    | No concerns    | Low               |
| CBT vs UC                | Some concerns     | Low risk       | No concerns  | No concerns    | Major concerns | Major concerns | Very low          |
| EDU vs PI                | No concerns       | Some concerns  | No concerns  | Major concerns | No concerns    | No concerns    | Very low          |
| EDU vs UC                | Some concerns     | Low risk       | No concerns  | No concerns    | Major concerns | No concerns    | Very low          |
| ES vs KT                 | Some concerns     | Some concerns  | No concerns  | Major concerns | No concerns    | No concerns    | Very low          |
| ES vs UC                 | Some concerns     | Some concerns  | No concerns  | Major concerns | No concerns    | No concerns    | Very low          |
| KT vs MUI                | Some concerns     | Some concerns  | No concerns  | No concerns    | Some concerns  | No concerns    | Very low          |
| MBT vs UC                | Some concerns     | Some concerns  | No concerns  | No concerns    | No concerns    | No concerns    | Low               |
| ME vs MUI                | No concerns       | Some concerns  | No concerns  | Major concerns | No concerns    | No concerns    | Very low          |
| ME vs UC                 | No concerns       | Some concerns  | No concerns  | Some concerns  | Some concerns  | No concerns    | Very low          |
| MUI vs UC                | Some concerns     | Low risk       | No concerns  | No concerns    | Major concerns | No concerns    | Very low          |
| Medi vs UC               | Some concerns     | Low risk       | No concerns  | Some concerns  | Some concerns  | No concerns    | Very low          |
| PI vs UC                 | Some concerns     | Some concerns  | No concerns  | No concerns    | Major concerns | No concerns    | Very low          |
| TM vs UC                 | Some concerns     | Some concerns  | No concerns  | Major concerns | No concerns    | No concerns    | Very low          |
| <b>Indirect evidence</b> |                   |                |              |                |                |                |                   |
| AC vs ES                 | Some concerns     | Some concerns  | No concerns  | Major concerns | No concerns    | No concerns    | Very low          |
| AC vs KT                 | Some concerns     | Some concerns  | No concerns  | Some concerns  | Some concerns  | No concerns    | Very low          |
| AC vs Medi               | Some concerns     | Low risk       | No concerns  | Major concerns | No concerns    | No concerns    | Very low          |
| AC vs UC                 | Some concerns     | Low risk       | No concerns  | Major concerns | No concerns    | No concerns    | Very low          |
| CBT vs ES                | Some concerns     | Some concerns  | No concerns  | No concerns    | Some concerns  | No concerns    | Very low          |
| CBT vs KT                | Some concerns     | Some concerns  | No concerns  | No concerns    | Some concerns  | No concerns    | Very low          |
| CBT vs MBT               | Some concerns     | Low risk       | No concerns  | No concerns    | Some concerns  | No concerns    | Low               |
| CBT vs MUI               | Some concerns     | Low risk       | No concerns  | Major concerns | No concerns    | No concerns    | Very low          |
| CBT vs Medi              | Some concerns     | Low risk       | No concerns  | Major concerns | No concerns    | No concerns    | Very low          |
| CBT vs TM                | Some concerns     | Some concerns  | No concerns  | Major concerns | No concerns    | No concerns    | Very low          |
| EDU vs ES                | Some concerns     | Some concerns  | No concerns  | No concerns    | Major concerns | No concerns    | Very low          |
| EDU vs KT                | Some concerns     | Some concerns  | No concerns  | No concerns    | Some concerns  | No concerns    | Very low          |
| EDU vs MBT               | Some concerns     | Low risk       | No concerns  | No concerns    | Some concerns  | No concerns    | Low               |
| EDU vs ME                | No concerns       | Low risk       | No concerns  | Major concerns | No concerns    | No concerns    | Low               |
| EDU vs MUI               | Some concerns     | Low risk       | No concerns  | Major concerns | No concerns    | No concerns    | Very low          |
| EDU vs Medi              | Some concerns     | Low risk       | No concerns  | Major concerns | No concerns    | No concerns    | Very low          |
| EDU vs TM                | Some concerns     | Some concerns  | No concerns  | Major concerns | No concerns    | No concerns    | Very low          |
| ES vs MBT                | Some concerns     | Some concerns  | No concerns  | No concerns    | No concerns    | No concerns    | Low               |
| ES vs ME                 | Some concerns     | Some concerns  | No concerns  | Some concerns  | Some concerns  | No concerns    | Very low          |
| ES vs MUI                | Some concerns     | Some concerns  | No concerns  | No concerns    | Major concerns | No concerns    | Very low          |
| ES vs Medi               | Some concerns     | Some concerns  | No concerns  | Some concerns  | Some concerns  | No concerns    | Very low          |
| ES vs PI                 | Some concerns     | Some concerns  | No concerns  | No concerns    | Major concerns | No concerns    | Very low          |
| ES vs TM                 | Some concerns     | Some concerns  | No concerns  | Major concerns | No concerns    | No concerns    | Very low          |
| KT vs MBT                | Some concerns     | Some concerns  | No concerns  | No concerns    | No concerns    | No concerns    | Low               |
| KT vs ME                 | Some concerns     | Some concerns  | No concerns  | No concerns    | Major concerns | No concerns    | Very low          |
| KT vs Medi               | Some concerns     | Some concerns  | No concerns  | Some concerns  | Some concerns  | No concerns    | Very low          |
| KT vs PI                 | Some concerns     | Some concerns  | No concerns  | No concerns    | Some concerns  | No concerns    | Very low          |
| KT vs TM                 | Some concerns     | Some concerns  | No concerns  | Major concerns | No concerns    | No concerns    | Very low          |
| KT vs UC                 | Some concerns     | Some concerns  | No concerns  | Major concerns | No concerns    | No concerns    | Very low          |
| MBT vs ME                | No concerns       | Low risk       | No concerns  | No concerns    | No concerns    | No concerns    | High              |
| MBT vs MUI               | Some concerns     | Low risk       | No concerns  | No concerns    | Some concerns  | No concerns    | Low               |
| MBT vs Medi              | Some concerns     | Low risk       | No concerns  | No concerns    | Some concerns  | No concerns    | Low               |
| MBT vs PI                | Some concerns     | Low risk       | No concerns  | No concerns    | Some concerns  | No concerns    | Low               |
| MBT vs TM                | Some concerns     | Some concerns  | No concerns  | No concerns    | No concerns    | No concerns    | Low               |
| ME vs Medi               | Some concerns     | Low risk       | No concerns  | Major concerns | No concerns    | No concerns    | Very low          |
| ME vs PI                 | No concerns       | Low risk       | No concerns  | Major concerns | No concerns    | No concerns    | Low               |
| ME vs TM                 | Some concerns     | Some concerns  | No concerns  | Major concerns | No concerns    | No concerns    | Very low          |

|             |               |               |             |                |             |             |          |
|-------------|---------------|---------------|-------------|----------------|-------------|-------------|----------|
| Medi vs MUI | Some concerns | Low risk      | No concerns | Major concerns | No concerns | No concerns | Very low |
| MUI vs PI   | Some concerns | Low risk      | No concerns | Major concerns | No concerns | No concerns | Very low |
| MUI vs TM   | Some concerns | Some concerns | No concerns | Major concerns | No concerns | No concerns | Very low |
| Medi vs PI  | Some concerns | Low risk      | No concerns | Major concerns | No concerns | No concerns | Very low |
| Medi vs TM  | Some concerns | Some concerns | No concerns | Major concerns | No concerns | No concerns | Very low |
| PI vs TM    | Some concerns | Some concerns | No concerns | Major concerns | No concerns | No concerns | Very low |

**Appendix 14. Certainty of evidence ratings on indirect and network evidence of different specific treatments for mental health**

| Comparison               | Within-study bias | Reporting bias | Indirectness | Imprecision    | Heterogeneity  | Incoherence | Confidence rating |
|--------------------------|-------------------|----------------|--------------|----------------|----------------|-------------|-------------------|
| <b>Mixed evidence</b>    |                   |                |              |                |                |             |                   |
| AC vs AT                 | No concerns       | Low risk       | No concerns  | No concerns    | Major concerns | No concerns | Low               |
| AC vs EDU                | Major concerns    | Some concerns  | No concerns  | Some concerns  | Some concerns  | No concerns | Very low          |
| AC vs TM                 | Some concerns     | Low risk       | No concerns  | Some concerns  | Some concerns  | No concerns | Very low          |
| AT vs MUI                | Major concerns    | Some concerns  | No concerns  | Major concerns | No concerns    | No concerns | Very low          |
| AT vs UC                 | Major concerns    | Some concerns  | No concerns  | Major concerns | No concerns    | No concerns | Very low          |
| EDU vs UC                | Some concerns     | Low risk       | No concerns  | Major concerns | No concerns    | No concerns | Very low          |
| MUI vs UC                | Some concerns     | Low risk       | No concerns  | No concerns    | Major concerns | No concerns | Very low          |
| Medi vs UC               | Some concerns     | Low risk       | No concerns  | Major concerns | No concerns    | No concerns | Very low          |
| TM vs UC                 | Some concerns     | Some concerns  | No concerns  | Major concerns | No concerns    | No concerns | Very low          |
| <b>Indirect evidence</b> |                   |                |              |                |                |             |                   |
| AC vs MUI                | Major concerns    | Low risk       | No concerns  | No concerns    | Major concerns | No concerns | Very low          |
| AC vs Medi               | Some concerns     | Some concerns  | No concerns  | Some concerns  | Some concerns  | No concerns | Very low          |
| AC vs UC                 | Some concerns     | Low risk       | No concerns  | Major concerns | No concerns    | No concerns | Very low          |
| AT vs EDU                | Major concerns    | Low risk       | No concerns  | Major concerns | No concerns    | No concerns | Very low          |
| AT vs Medi               | Some concerns     | Some concerns  | No concerns  | Major concerns | No concerns    | No concerns | Very low          |
| AT vs TM                 | Some concerns     | Some concerns  | No concerns  | Major concerns | No concerns    | No concerns | Very low          |
| EDU vs MUI               | Some concerns     | Low risk       | No concerns  | Major concerns | No concerns    | No concerns | Very low          |
| EDU vs Medi              | Some concerns     | Some concerns  | No concerns  | Major concerns | No concerns    | No concerns | Very low          |
| EDU vs TM                | Some concerns     | Some concerns  | No concerns  | Major concerns | No concerns    | No concerns | Very low          |
| Medi vs MUI              | Some concerns     | Low risk       | No concerns  | Major concerns | No concerns    | No concerns | Very low          |
| MUI vs TM                | Some concerns     | Some concerns  | No concerns  | Major concerns | No concerns    | No concerns | Very low          |
| Medi vs TM               | Some concerns     | Some concerns  | No concerns  | Major concerns | No concerns    | No concerns | Very low          |



**Appendix 15. Pooled standardized mean difference and heterogeneity for each direct comparison of different categories of interventions for depression**

| <b>Comparison</b> | <b>Number of RCTs</b> | <b>Number of participants</b> | <b>(Pooled) SMD (95% CI)</b> | <b>I square (%)</b> | <b>P value</b> |
|-------------------|-----------------------|-------------------------------|------------------------------|---------------------|----------------|
| EX vs CO          | 7                     | 412                           | -0.21 (-0.40, -0.01)         | 0                   | 0.040          |
| MBT vs CO         | 6                     | 321                           | -1.28 (-2.11, -0.44)         | 90                  | 0.003          |
| EDU vs CO         | 4                     | 649                           | -0.24 (-0.61, 0.13)          | 71                  | 0.200          |
| TM vs CO          | 3                     | 131                           | 0.08 (-0.48, 0.63)           | 59                  | 0.790          |
| BA vs CO          | 9                     | 645                           | -0.42 (-0.73, -0.12)         | 71                  | 0.007          |
| MUI vs CO         | 5                     | 636                           | -0.13 (-0.29, 0.02)          | 47                  | 0.100          |
| PT vs CO          | 16                    | 785                           | -0.25 (-0.39, -0.10)         | 35                  | <0.001         |
| BA vs EDU         | 1                     | 180                           | -0.39 (-0.71, -0.07)         | NA                  | NA             |
| BA vs EX          | 1                     | 28                            | 0.36 (-0.39, 1.11)           | NA                  | NA             |
| EX vs MUI         | 2                     | 57                            | 0.34 (-1.25, 1.93)           | 88                  | 0.670          |
| EX vs PT          | 4                     | 123                           | 0.13 (-0.47, 0.74)           | 63                  | 0.660          |
| MUI vs PT         | 1                     | 22                            | -0.98 (-1.88, -0.09)         | NA                  | NA             |
| BA vs MUI         | 1                     | 32                            | -0.05 (-0.75, 0.65)          | NA                  | NA             |

**Appendix 16 . Comparative effectiveness of different categories of interventions: surface under the cumulative ranking curves (SUCRA) for depression**

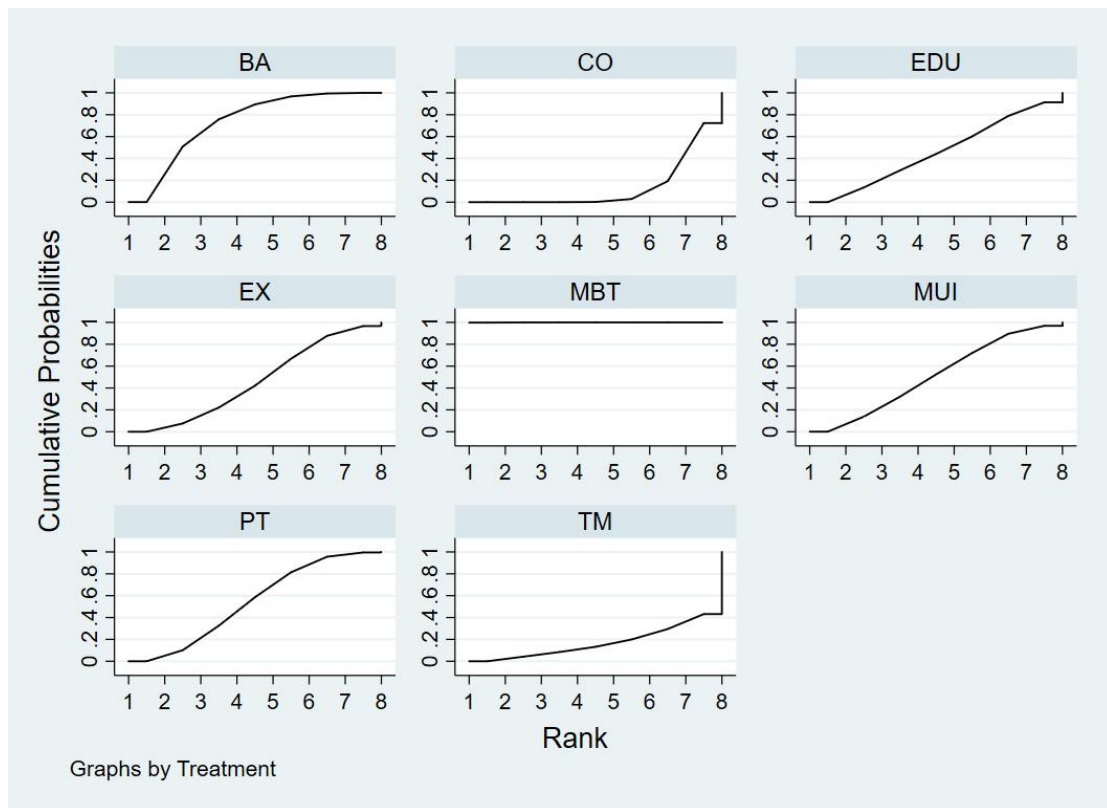

**Appendix 17. Network plot of subgroup comparisons in the network meta-analysis of specific treatments for depression. Nodes' sizes and line widths represent the number of randomized patients and controlled trials for each treatment, respectively. The size of the node corresponds to the number of patients randomized to each treatment, whereas the line width indicates the number of randomized controlled trials comparing each pair of treatments. MBT, Mind body therapy; Mass, Massage; CBT, Cognitive-behavioural treatments; PI, Psychosocial intervention; RT, Relaxation training; Acup, Acupuncture; Medi, Meditation; MUI, Multicomponent intervention; EDU, Education; AT, Aerobic training; SE, Stabilization exercise; ME, Mixed exercise training; ES, Electrical stimulation; AC, Active control; UC, Usual care; KT, Kinesiology taping; TM, Telemedicine. Interventions details are described in Appendix 3.**

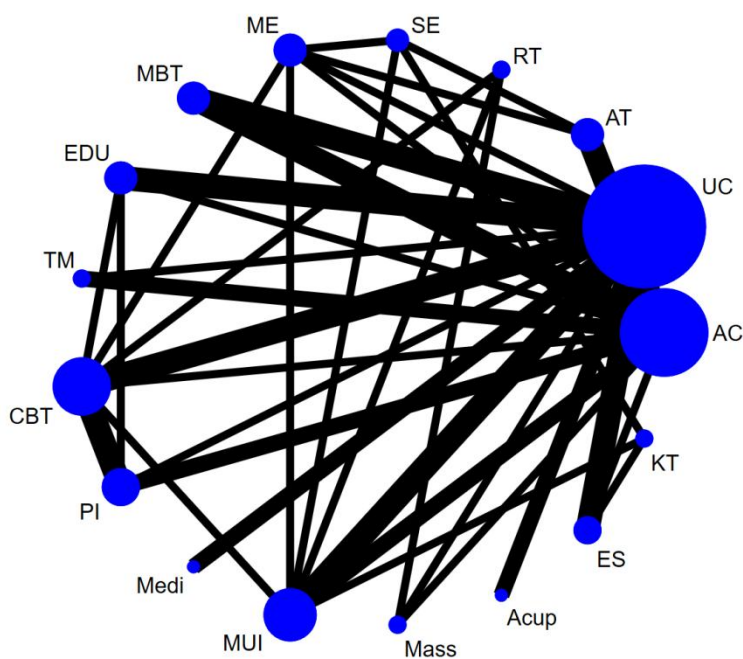

Appendix 18. Subgroup analysis of comparative effectiveness of specific treatments for depression

|                                      |                       |                                      |                       |                       |                       |                       |                       |                        |                       |                        |                       |                       |                                      |                                      |                        |                       |
|--------------------------------------|-----------------------|--------------------------------------|-----------------------|-----------------------|-----------------------|-----------------------|-----------------------|------------------------|-----------------------|------------------------|-----------------------|-----------------------|--------------------------------------|--------------------------------------|------------------------|-----------------------|
| <b>MBT</b>                           | NA                    | NA                                   | NA                    | NA                    | NA                    | NA                    | NA                    | NA                     | NA                    | NA                     | NA                    | NA                    | -1.46<br>(-3.03,0.11)                | <b>-1.03</b><br><b>(-1.68,-0.37)</b> | NA                     | NA                    |
| -0.50<br>(-1.35,0.34)                | <b>Mass</b>           | NA                                   | NA                    | -0.76<br>(-1.59,0.08) | NA                    | NA                    | NA                    | NA                     | NA                    | NA                     | NA                    | NA                    | -0.55<br>(-1.18,0.09)                | -0.54<br>(-1.07,0.00)                | NA                     | NA                    |
| <b>-0.77</b><br><b>(-1.39,-0.15)</b> | -0.27<br>(-1.05,0.52) | <b>CBT</b>                           | -0.03<br>(-0.47,0.41) | 0.36<br>(-0.39,1.11)  | NA                    | NA                    | -0.05<br>(-0.75,0.65) | -0.27<br>(-0.64,0.09)  | NA                    | NA                     | 0.17<br>(-0.23,0.57)  | NA                    | 0.09<br>(-0.34,0.51)                 | <b>-0.82</b><br><b>(-1.59,-0.05)</b> | NA                     | NA                    |
| <b>-0.82</b><br><b>(-1.48,-0.16)</b> | -0.31<br>(-1.14,0.52) | -0.05<br>(-0.53,0.44)                | <b>PI</b>             | NA                    | NA                    | NA                    | NA                    | -0.50<br>(-0.86,-0.13) | NA                    | NA                     | NA                    | NA                    | <b>-0.43</b><br><b>(-0.82,-0.05)</b> | -0.31<br>(-0.86,0.23)                | NA                     | NA                    |
| -0.81<br>(-1.79,0.17)                | -0.30<br>(-1.20,0.60) | -0.04<br>(-0.92,0.85)                | 0.01<br>(-0.94,0.96)  | <b>RT</b>             | NA                    | NA                    | -0.45<br>(-1.16,0.26) | NA                     | NA                    | NA                     | NA                    | NA                    | NA                                   | NA                                   | NA                     | NA                    |
| -0.85<br>(-1.78,0.09)                | -0.34<br>(-1.41,0.72) | -0.08<br>(-0.96,0.81)                | -0.03<br>(-0.96,0.89) | -0.04<br>(-1.21,1.13) | <b>Acup</b>           | NA                    | NA                    | NA                     | NA                    | NA                     | NA                    | NA                    | NA                                   | -0.41<br>(-0.84,0.01)                | NA                     | NA                    |
| -0.86<br>(-1.77,0.05)                | -0.36<br>(-1.40,0.68) | -0.09<br>(-0.95,0.77)                | -0.05<br>(-0.95,0.86) | -0.06<br>(-1.21,1.10) | -0.01<br>(-1.10,1.07) | <b>Medi</b>           | NA                    | NA                     | NA                    | NA                     | NA                    | NA                    | NA                                   | -0.36<br>(-1.27,0.56)                | NA                     | NA                    |
| <b>-0.98</b><br><b>(-1.59,-0.36)</b> | -0.47<br>(-1.25,0.31) | -0.21<br>(-0.73,0.32)                | -0.16<br>(-0.75,0.43) | -0.17<br>(-1.05,0.71) | -0.13<br>(-1.02,0.76) | -0.12<br>(-0.98,0.75) | <b>MUI</b>            | NA                     | NA                    | -1.17<br>(-2.03,-0.31) | -0.26<br>(-0.64,0.11) | NA                    | 0.05<br>(-0.23,0.32)                 | -0.24<br>(-0.52,0.04)                | -0.98<br>(-1.88,-0.09) | NA                    |
| <b>-1.01</b><br><b>(-1.67,-0.35)</b> | -0.51<br>(-1.33,0.32) | -0.24<br>(-0.79,0.31)                | -0.19<br>(-0.78,0.40) | -0.20<br>(-1.16,0.76) | -0.16<br>(-1.07,0.74) | -0.15<br>(-1.03,0.73) | -0.03<br>(-0.62,0.56) | <b>EDU</b>             | NA                    | NA                     | NA                    | NA                    | -1.02<br>(-1.61,-0.43)               | -0.08<br>(-0.24,0.08)                | NA                     | NA                    |
| <b>-1.04</b><br><b>(-1.74,-0.34)</b> | -0.53<br>(-1.41,0.34) | -0.27<br>(-0.93,0.39)                | -0.22<br>(-0.92,0.48) | -0.23<br>(-1.24,0.77) | -0.19<br>(-1.17,0.79) | -0.18<br>(-1.13,0.78) | -0.06<br>(-0.70,0.58) | -0.03<br>(-0.73,0.68)  | <b>AT</b>             | 0.47<br>(-0.37,1.31)   | -0.25<br>(-1.04,0.54) | NA                    | -0.12<br>(-0.49,0.25)                | -0.58<br>(-1.44,0.27)                | NA                     | NA                    |
| <b>-1.09</b><br><b>(-2.05,-0.13)</b> | -0.58<br>(-1.67,0.50) | -0.32<br>(-1.23,0.59)                | -0.27<br>(-1.22,0.68) | -0.28<br>(-1.46,0.89) | -0.24<br>(-1.40,0.92) | -0.23<br>(-1.37,0.91) | -0.11<br>(-0.96,0.74) | -0.08<br>(-1.03,0.87)  | -0.05<br>(-0.94,0.84) | <b>SE</b>              | -0.65<br>(-1.52,0.22) | NA                    | NA                                   | NA                                   | 0.00<br>(-0.83,0.82)   | NA                    |
| <b>-1.09</b><br><b>(-1.82,-0.36)</b> | -0.59<br>(-1.47,0.30) | -0.32<br>(-0.96,0.31)                | -0.28<br>(-0.98,0.43) | -0.29<br>(-1.29,0.71) | -0.24<br>(-1.22,0.74) | -0.23<br>(-1.18,0.72) | -0.11<br>(-0.73,0.50) | -0.08<br>(-0.79,0.63)  | -0.05<br>(-0.76,0.65) | -0.00<br>(-0.90,0.89)  | <b>ME</b>             | NA                    | -0.07<br>(-0.45,0.32)                | -0.34<br>(0.72,0.04)                 | NA                     | NA                    |
| <b>-1.16</b><br><b>(-1.88,-0.44)</b> | -0.66<br>(-1.54,0.22) | -0.39<br>(-1.06,0.27)                | -0.35<br>(-1.06,0.36) | -0.36<br>(-1.36,0.65) | -0.31<br>(-1.27,0.64) | -0.30<br>(-1.23,0.63) | -0.19<br>(-0.83,0.46) | -0.15<br>(-0.85,0.54)  | -0.12<br>(-0.88,0.63) | -0.07<br>(-1.02,0.87)  | -0.07<br>(-0.84,0.69) | <b>ES</b>             | -0.42<br>(-1.05,0.21)                | 0.10<br>(-0.27,0.46)                 | -0.01<br>(-0.52,0.50)  | NA                    |
| <b>-1.22</b><br><b>(-1.72,-0.72)</b> | -0.71<br>(-1.44,0.01) | -0.45<br>(-0.92,0.02)                | -0.40<br>(-0.91,0.10) | -0.41<br>(-1.30,0.48) | -0.37<br>(-1.24,0.50) | -0.36<br>(-1.20,0.49) | -0.24<br>(-0.69,0.21) | -0.21<br>(-0.74,0.32)  | -0.18<br>(-0.71,0.35) | -0.13<br>(-0.99,0.73)  | -0.13<br>(-0.72,0.47) | -0.06<br>(-0.66,0.55) | <b>AC</b>                            | NA                                   | NA                     | -0.12<br>(-1.05,0.80) |
| <b>-1.22</b><br><b>(-1.74,-0.71)</b> | -0.72<br>(-1.44,0.00) | <b>-0.45</b><br><b>(-0.87,-0.03)</b> | -0.41<br>(-0.90,0.09) | -0.42<br>(-1.29,0.46) | -0.37<br>(-1.15,0.41) | -0.36<br>(-1.11,0.39) | -0.24<br>(-0.67,0.18) | -0.21<br>(-0.67,0.25)  | -0.18<br>(-0.77,0.41) | -0.13<br>(-0.99,0.73)  | -0.13<br>(-0.72,0.46) | -0.06<br>(-0.60,0.49) | -0.00<br>(-0.39,0.38)                | <b>UC</b>                            | NA                     | -0.02<br>(-0.70,0.65) |
| <b>-1.33</b><br><b>(-2.30,-0.35)</b> | -0.82<br>(-1.92,0.27) | -0.56<br>(-1.49,0.37)                | -0.51<br>(-1.48,0.46) | -0.52<br>(-1.71,0.67) | -0.48<br>(-1.64,0.69) | -0.47<br>(-1.61,0.68) | -0.35<br>(-1.22,0.52) | -0.32<br>(-1.28,0.65)  | -0.29<br>(-1.27,0.69) | -0.24<br>(-1.23,0.76)  | -0.24<br>(-1.21,0.74) | -0.16<br>(-0.99,0.67) | -0.11<br>(-1.00,0.78)                | -0.11<br>(-0.97,0.76)                | <b>KT</b>              | NA                    |
| <b>-1.30</b><br><b>(-2.10,-0.51)</b> | -0.80<br>(-1.75,0.15) | -0.53<br>(-1.30,0.23)                | -0.49<br>(-1.28,0.31) | -0.50<br>(-1.57,0.58) | -0.46<br>(-1.50,0.59) | -0.44<br>(-1.46,0.58) | -0.33<br>(-1.08,0.43) | -0.29<br>(-1.09,0.50)  | -0.27<br>(-1.09,0.56) | -0.22<br>(-1.27,0.84)  | -0.21<br>(-1.06,0.64) | -0.14<br>(-0.99,0.71) | -0.08<br>(-0.73,0.57)                | -0.08<br>(-0.77,0.61)                | 0.02<br>(-1.05,1.10)   | <b>TM</b>             |

Certainty of Evidence

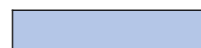

High

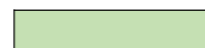

Moderate

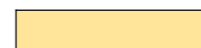

Low

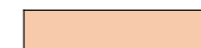

Very Low

**Notes:** The league tables show the pooled outcomes of the network meta-analyses (lower diagonal) and pairwise meta-analyses (upper diagonal) for subgroup analysis of comparative effectiveness of specific treatments for depression. The relative effect sizes of each approach were measured as a standardized mean difference and 95% confidence intervals. **Bold indicates statistical significance.** Comparisons between treatments should be read from left to right, and the estimate is in the cell in common between the column-defining treatment and the row-defining treatment. The imprecision for the rating of Certainty of Evidence on direct evidence was not considered. (According to the GRADE, recommended “consideration of imprecision is not necessary when rating the direct and indirect estimates to inform the rating of the network estimates”.) The detailed of Certainty of Evidence were presented in Appendices 8 and 12. NA, Not available; MBT, Mind body therapy; Mass, Massage; CBT, Cognitive-behavioural treatments; PI, Psychosocial intervention; RT, Relaxation training; Acup, Acupuncture; Medi, Meditation; MUI, Multicomponent intervention; EDU, Education; AT, Aerobic training; SE, Stabilization exercise; ME, Mixed exercise training; ES, Electrical stimulation; AC, Active control; UC, Usual care; KT, Kinesiology taping; TM, Telemedicine. Interventions details are described in Appendix 3.

**Appendix 19. Subgroup analysis of comparative effectiveness of specific treatments: surface under the cumulative ranking curves (SUCRA) for depression**

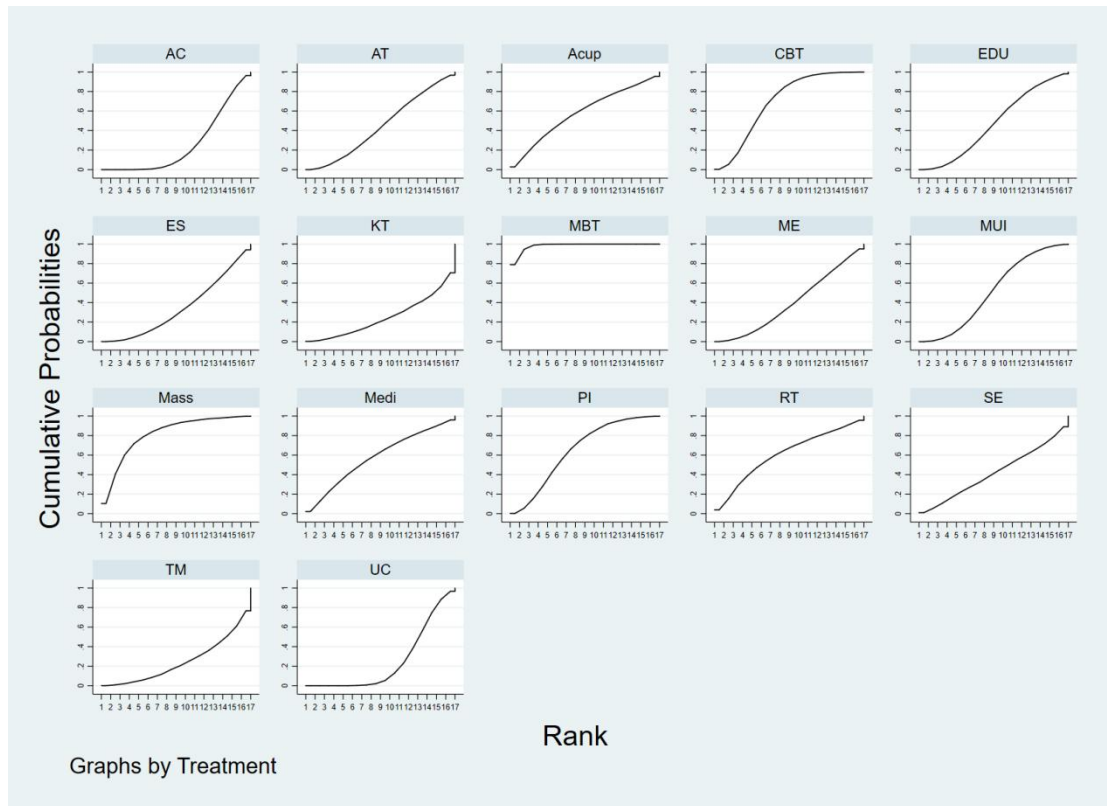

**Appendix 20. Pooled standardized mean difference and heterogeneity for each direct comparison of different categories of interventions for anxiety**

| <b>Comparison</b> | <b>Number of RCTs</b> | <b>Number of participants</b> | <b>(Pooled) SMD (95% CI)</b> | <b>I square (%)</b> | <b>P value</b> |
|-------------------|-----------------------|-------------------------------|------------------------------|---------------------|----------------|
| EX vs CO          | 2                     | 216                           | -0.27 (-0.54, 0.00)          | 11                  | 0.050          |
| MBT vs CO         | 3                     | 187                           | -1.34 (-1.66, -1.02)         | 0                   | <0.001         |
| EDU vs CO         | 3                     | 205                           | -0.55 (-1.04, -0.06)         | 66                  | 0.030          |
| TE vs CO          | 2                     | 71                            | -0.03 (-0.50, 0.44)          | 0                   | 0.900          |
| BA vs CO          | 7                     | 499                           | -0.47 (-0.88, -0.06)         | 79                  | 0.030          |
| MUI vs CO         | 4                     | 327                           | -0.41 (-0.63, -0.19)         | 24                  | <0.001         |
| PT vs CO          | 2                     | 74                            | 0.33 (-0.13, 0.79)           | 0                   | 0.160          |
| EX vs MUI         | 2                     | 138                           | 0.59 (-0.14, 1.33)           | 63                  | 0.110          |
| EX vs PT          | 2                     | 47                            | 0.35 (-0.83, 1.53)           | 74                  | 0.560          |
| BA vs EDU         | 1                     | 180                           | -0.29 (-0.60, 0.03)          | NA                  | NA             |
| MUI vs PT         | 1                     | 22                            | -1.53 (-2.51, -0.55)         | NA                  | NA             |
| BA vs EX          | 1                     | 102                           | 0.04 (-0.36, 0.43)           | NA                  | NA             |

**Appendix 21. Comparative effectiveness of different categories of interventions: surface under the cumulative ranking curves (SUCRA) for anxiety**

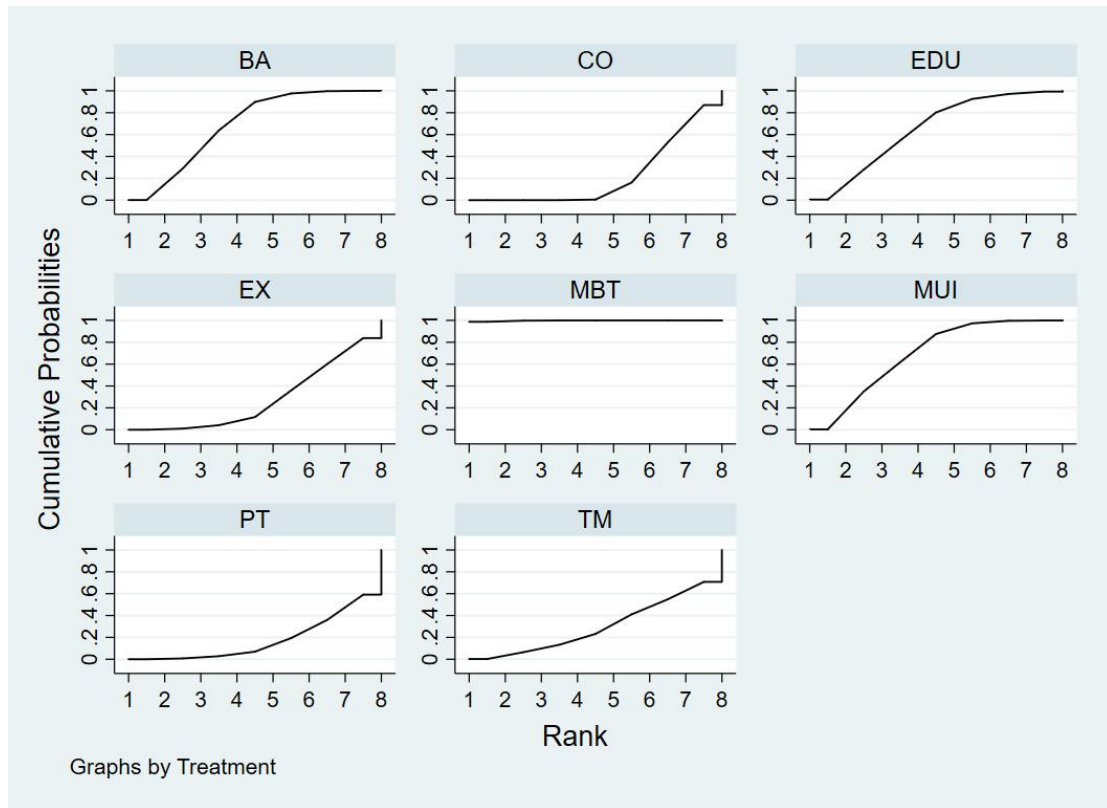



**Appendix 22. Network plot of subgroup comparisons in the network meta-analysis of specific treatments for anxiety. Nodes' sizes and line widths represent the number of randomized patients and controlled trials for each treatment, respectively. The size of the node corresponds to the number of patients randomized to each treatment, whereas the line width indicates the number of randomized controlled trials comparing each pair of treatments. MBT, Mind body therapy; CBT, Cognitive-behavioural treatments; PI, Psychosocial intervention; MUI, Multicomponent intervention; EDU, Education; Medi, Meditation; ME, Mixed exercise training; AC, Active control; TM, Telemedicine; UC, Usual care; ES, Electrical stimulation; KT, Kinesiology taping. Interventions details are described in Appendix 3.**

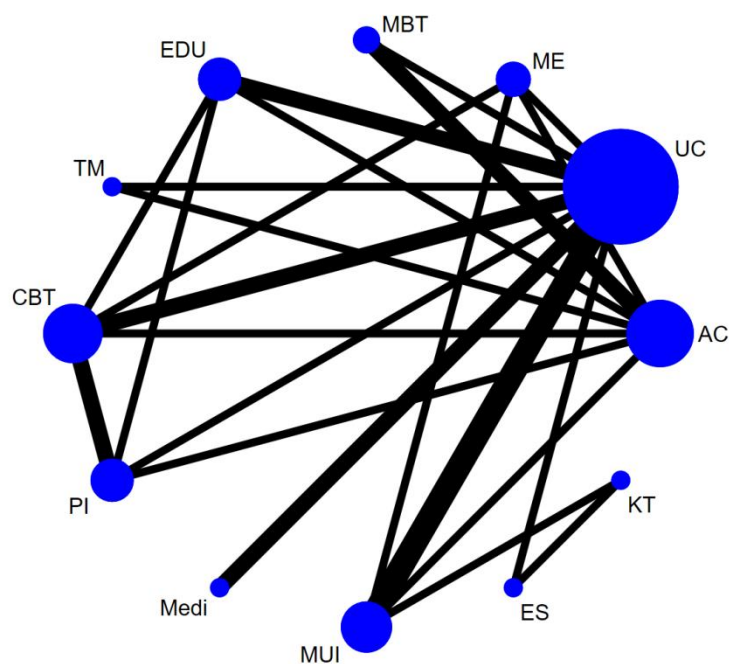

Appendix 23. Subgroup analysis of comparative effectiveness of specific treatments for anxiety

|                                      |                                      |                                      |                                      |                                      |                       |                        |                                      |                       |                                      |                       |                        |
|--------------------------------------|--------------------------------------|--------------------------------------|--------------------------------------|--------------------------------------|-----------------------|------------------------|--------------------------------------|-----------------------|--------------------------------------|-----------------------|------------------------|
| <b>MBT</b>                           | NA                                   | NA                                   | NA                                   | NA                                   | NA                    | NA                     | <b>-1.34</b><br><b>(-1.69,-0.99)</b> | NA                    | -1.33<br>(-2.13,-0.53)               | NA                    | NA                     |
| <b>-0.90</b><br><b>(-1.59,-0.21)</b> | <b>CBT</b>                           | 0.19<br>(-0.14,0.51)                 | NA                                   | -0.20<br>(-0.56,0.17)                | NA                    | 0.04<br>(-0.36,0.43)   | -0.08<br>(-0.50,0.35)                | NA                    | -1.38<br>(-3.32,0.56)                | NA                    | NA                     |
| <b>-0.95</b><br><b>(-1.65,-0.24)</b> | -0.05<br>(-0.54,0.45)                | <b>PI</b>                            | NA                                   | -0.38<br>(-0.74,-0.02)               | NA                    | NA                     | -0.27<br>(-0.73,0.18)                | NA                    | 0.00 (-0.54,0.54)                    | NA                    | NA                     |
| <b>-1.00</b><br><b>(-1.69,-0.31)</b> | -0.10<br>(-0.66,0.46)                | -0.05<br>(-0.65,0.55)                | <b>MUI</b>                           | NA                                   | NA                    | -0.31<br>(-0.68,0.06)  | -0.20<br>(-0.58,0.17)                | NA                    | <b>-0.51</b><br><b>(-0.78,-0.24)</b> | NA                    | -1.53<br>(-2.51,-0.55) |
| <b>-1.01</b><br><b>(-1.70,-0.31)</b> | -0.11<br>(-0.62,0.41)                | -0.06<br>(-0.60,0.48)                | -0.01<br>(-0.58,0.57)                | <b>EDU</b>                           | NA                    | NA                     | -0.74<br>(-1.31,-0.16)               | NA                    | -0.46<br>(-1.24,0.32)                | NA                    | NA                     |
| <b>-1.09</b><br><b>(-1.97,-0.22)</b> | -0.19<br>(-0.96,0.57)                | -0.15<br>(-0.94,0.64)                | -0.10<br>(-0.84,0.65)                | -0.09<br>(-0.85,0.68)                | <b>Medi</b>           | NA                     | NA                                   | NA                    | -0.41<br>(-1.43,0.61)                | NA                    | NA                     |
| <b>-1.10</b><br><b>(-1.84,-0.35)</b> | -0.20<br>(-0.78,0.39)                | -0.15<br>(-0.80,0.50)                | -0.10<br>(-0.67,0.48)                | -0.09<br>(-0.73,0.55)                | -0.00<br>(-0.82,0.82) | <b>ME</b>              | -0.12<br>(-0.50,0.27)                | NA                    | -1.33<br>(-2.13,-0.53)               | NA                    | NA                     |
| <b>-1.30</b><br><b>(-1.83,-0.76)</b> | -0.40<br>(-0.90,0.11)                | -0.35<br>(-0.86,0.17)                | -0.30<br>(-0.80,0.20)                | -0.29<br>(-0.80,0.22)                | -0.20<br>(-0.96,0.56) | -0.20<br>(-0.76,0.37)  | <b>AC</b>                            | -0.13<br>(-0.78,0.52) | NA                                   | NA                    | NA                     |
| <b>-1.37</b><br><b>(-2.24,-0.51)</b> | -0.47<br>(-1.27,0.33)                | -0.42<br>(-1.24,0.39)                | -0.37<br>(-1.16,0.42)                | -0.36<br>(-1.16,0.44)                | -0.28<br>(-1.22,0.67) | -0.27<br>(-1.12,0.57)  | -0.08<br>(-0.79,0.64)                | <b>TM</b>             | -0.20<br>(-0.88,0.47)                | NA                    | NA                     |
| <b>-1.52</b><br><b>(-2.14,-0.90)</b> | <b>-0.62</b><br><b>(-1.06,-0.17)</b> | <b>-0.57</b><br><b>(-1.06,-0.08)</b> | <b>-0.52</b><br><b>(-0.94,-0.10)</b> | <b>-0.51</b><br><b>(-0.95,-0.06)</b> | -0.42<br>(-1.04,0.20) | -0.42<br>(-0.96,0.12)  | -0.22<br>(-0.66,0.22)                | -0.15<br>(-0.86,0.57) | <b>UC</b>                            | -0.19<br>(-1.05,0.67) | NA                     |
| <b>-2.01</b><br><b>(-3.09,-0.94)</b> | -1.11<br>(-2.10,-0.12)               | -1.07<br>(-2.08,-0.05)               | -1.01<br>(-1.94,-0.09)               | -1.01<br>(-2.00,-0.01)               | -0.92<br>(-2.01,0.17) | -0.92<br>(-1.94,0.11)  | -0.72<br>(-1.69,0.26)                | -0.64<br>(-1.78,0.50) | -0.50<br>(-1.39,0.40)                | <b>ES</b>             | 0.05 (-0.47,0.56)      |
| <b>-2.15</b><br><b>(-3.26,-1.05)</b> | -1.25<br>(-2.29,-0.22)               | -1.21<br>(-2.26,-0.16)               | -1.16<br>(-2.09,-0.22)               | -1.15<br>(-2.18,-0.11)               | -1.06<br>(-2.19,0.07) | -1.06<br>(-2.11,-0.00) | -0.86<br>(-1.87,0.15)                | -0.78<br>(-1.95,0.39) | -0.64<br>(-1.58,0.31)                | -0.14<br>(-0.91,0.63) | <b>KT</b>              |

Certainty of Evidence  High  Moderate  Low  Very Low

Notes: The league tables show the pooled outcomes of the network meta-analyses (lower diagonal) and pairwise meta-analyses (upper diagonal) for subgroup analysis of comparative effectiveness of specific treatments for anxiety. The relative effect sizes of each approach were measured as a standardized mean difference and 95% confidence intervals. Bold indicates statistical significance. Comparisons between treatments should be read from left to right, and the estimate is in the cell in common between the column-defining treatment and the row-defining treatment. The imprecision for the rating of Certainty of Evidence on direct evidence was not considered. (According to the GRADE, recommended “consideration of imprecision is not necessary when rating the direct and indirect estimates to inform the rating of the network estimates”.) The detailed of Certainty of Evidence were presented in Appendices 8 and 13. NA, Not available; MBT, Mind body therapy; CBT, Cognitive-behavioural treatments; PI, Psychosocial intervention; MUI, Multicomponent intervention; EDU, Education; Medi, Meditation; ME, Mixed exercise training; AC, Active control; TM, Telemedicine; UC, Usual care; ES, Electrical stimulation; KT, Kinesiology taping. Interventions details are described in Appendix 3.

**Appendix 24. Subgroup analysis of comparative effectiveness of specific treatments: surface under the cumulative ranking curves (SUCRA) for anxiety**

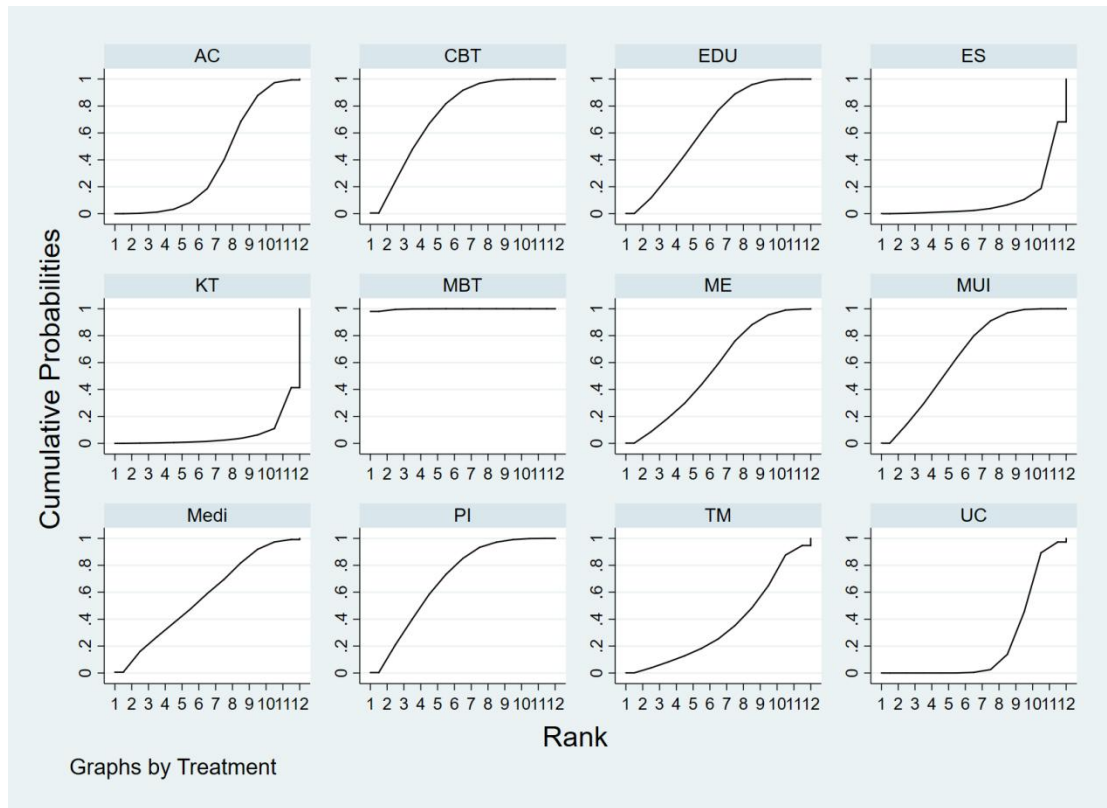

**Appendix 25. Pooled standardized mean difference and heterogeneity for each direct comparison of different categories of interventions for mental health**

| <b>Comparison</b> | <b>Number of RCTs</b> | <b>Number of participants</b> | <b>(Pooled) SMD (95% CI)</b> | <b>I square (%)</b> | <b>P value</b> |
|-------------------|-----------------------|-------------------------------|------------------------------|---------------------|----------------|
| EX vs CO          | 6                     | 327                           | 0.56 (0.01, 1.11)            | 82                  | 0.050          |
| EDU vs CO         | 4                     | 39                            | 0.30 (-0.11, 0.71)           | 76                  | 0.150          |
| TE vs CO          | 3                     | 145                           | 0.41 (-0.69, 1.50)           | 90                  | 0.470          |
| BA vs CO          | 2                     | 119                           | 0.43 (-0.29, 1.14)           | 73                  | 0.250          |
| MUI vs CO         | 4                     | 360                           | 0.60 (0.01, 1.19)            | 83                  | 0.040          |
| PT vs CO          | 8                     | 562                           | 0.47 (0.11, 0.83)            | 75                  | 0.010          |
| EX vs MUI         | 2                     | 162                           | -0.47 (-1.31, 0.37)          | 84                  | 0.270          |
| EX vs PT          | 1                     | 39                            | 0.44 (-0.19, 1.08)           | NA                  | NA             |

**Appendix 26. Comparative effectiveness of different categories of interventions: surface under the cumulative ranking curves (SUCRA) for mental health**

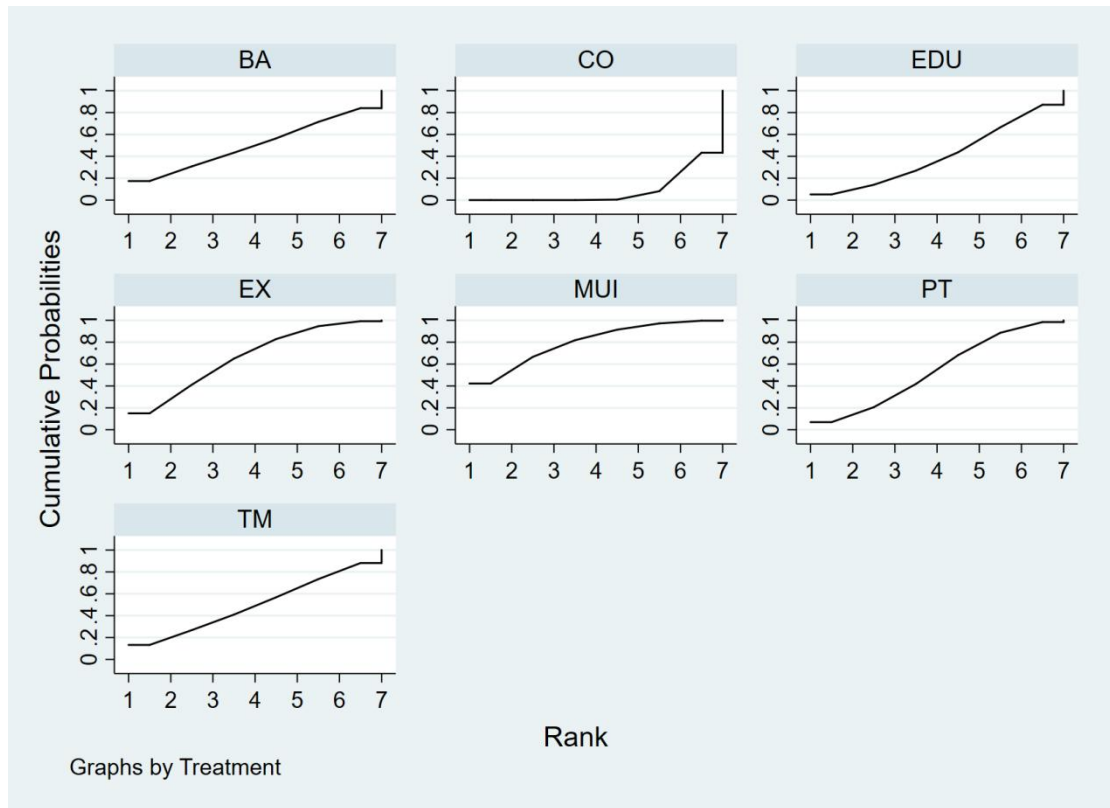

Appendix 27. Network plot of subgroup comparisons in the network meta-analysis of specific treatments for mental health. Nodes' sizes and line widths represent the number of randomized patients and controlled trials for each treatment, respectively. The size of the node corresponds to the number of patients randomized to each treatment, whereas the line width indicates the number of randomized controlled trials comparing each pair of treatments. MUI, Multicomponent intervention; AT, Aerobic training; Medi, Meditation; EDU, Education; TM, Telemedicine; UC, Usual care; AC, Active control. Interventions details are described in Appendix 3.

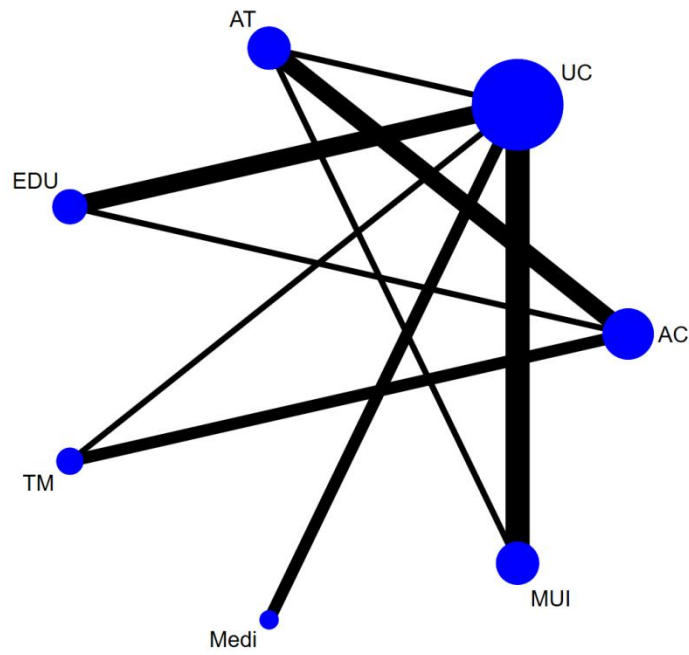

Appendix 28. Subgroup analysis of comparative effectiveness of specific treatments for mental health

|                         |                         |                   |                   |                   |                         |                         |
|-------------------------|-------------------------|-------------------|-------------------|-------------------|-------------------------|-------------------------|
| <b>MUI</b>              | 0.02 (-0.54,0.58)       | NA                | NA                | NA                | <b>0.60 (0.01,1.19)</b> | NA                      |
| 0.23 (-0.76,1.22)       | <b>AT</b>               | NA                | NA                | NA                | -0.04 (-0.61,0.53)      | <b>1.03 (0.03,2.02)</b> |
| 0.22 (-0.91,1.35)       | -0.01 (-1.30,1.27)      | <b>Medi</b>       | NA                | NA                | 0.43 (-0.29,1.14)       | NA                      |
| 0.46 (-0.46,1.37)       | 0.23 (-0.78,1.23)       | 0.24 (-0.90,1.37) | <b>EDU</b>        | NA                | 0.24 (-0.26,0.73)       | 0.57 (-0.01,1.14)       |
| 0.60 (-0.53,1.73)       | 0.37 (-0.65,1.39)       | 0.38 (-0.96,1.72) | 0.14 (-0.93,1.22) | <b>TM</b>         | 0.02 (-0.66,0.69)       | 0.59 (-1.05,2.23)       |
| 0.64 (-0.02,1.30)       | 0.41 (-0.49,1.31)       | 0.42 (-0.50,1.34) | 0.18 (-0.48,0.85) | 0.04 (-0.94,1.02) | <b>UC</b>               | NA                      |
| <b>1.20 (0.19,2.22)</b> | <b>0.97 (0.25,1.69)</b> | 0.98 (-0.29,2.26) | 0.75 (-0.18,1.67) | 0.60 (-0.22,1.42) | 0.56 (-0.32,1.44)       | <b>AC</b>               |

Certainty of Evidence

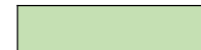

Moderate

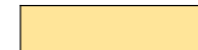

Low

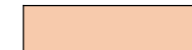

Very Low

Notes: The league tables show the pooled outcomes of the network meta-analyses (lower diagonal) and pairwise meta-analyses (upper diagonal) for subgroup analysis of comparative effectiveness of specific treatments for mental health. The relative effect sizes of each approach were measured as a standardized mean difference and 95% confidence intervals. Bold indicates statistical significance. Comparisons between treatments should be read from left to right, and the estimate is in the cell in common between the column-defining treatment and the row-defining treatment. The imprecision for the rating of Certainty of Evidence on direct evidence was not considered. (According to the GRADE, recommended “consideration of imprecision is not necessary when rating the direct and indirect estimates to inform the rating of the network estimates”.) The detailed of Certainty of Evidence were presented in Appendices 8 and 14. NA, Not available; MUI, Multicomponent intervention; AT, Aerobic training; Medi, Meditation; EDU, Education; TM, Telemedicine; UC, Usual care; AC, Active control. Interventions details are described in Appendix 3.

**Appendix 29. Subgroup analysis of comparative effectiveness of specific treatments: surface under the cumulative ranking curves (SUCRA) for mental health**

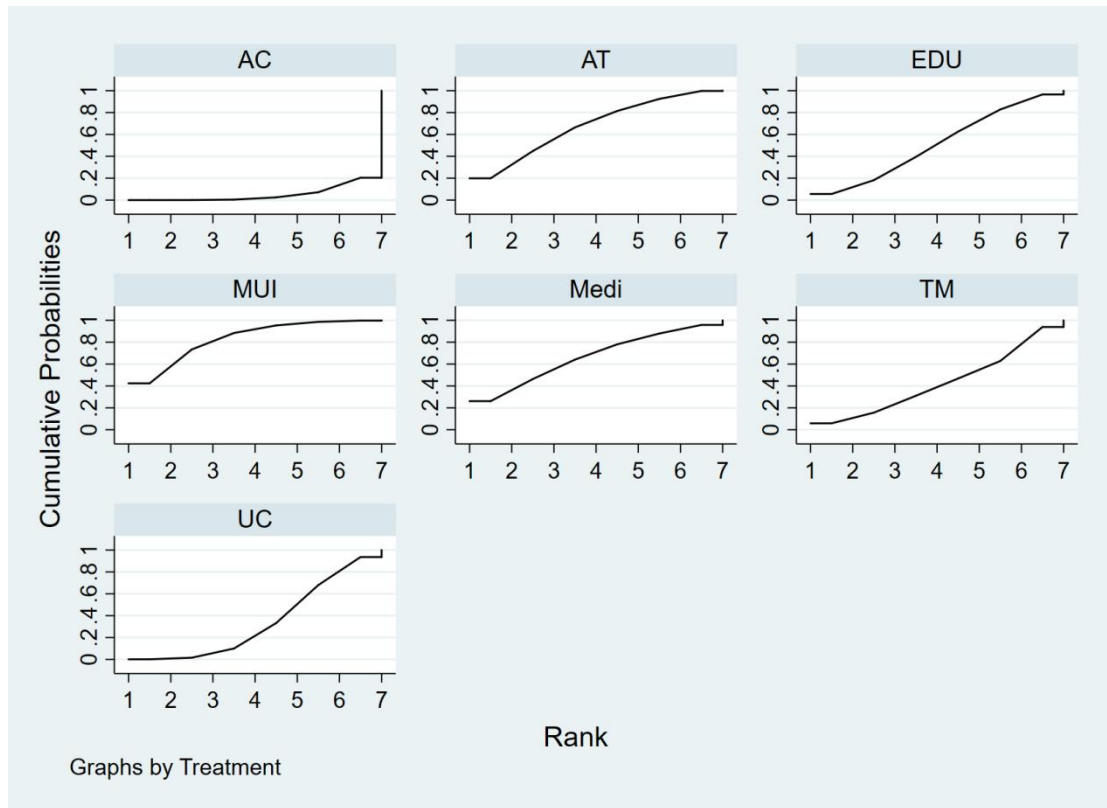



**Appendix 30. Evaluation of global inconsistency for different categories of interventions and specific treatments**

| <b>Psychological symptoms</b>                                   | <b>Chi<sup>2</sup></b> | <b>P value</b> |
|-----------------------------------------------------------------|------------------------|----------------|
| <b>Different categories of interventions</b>                    |                        |                |
| Depression                                                      | 8.82                   | 0.7183         |
| Anxiety                                                         | 9.55                   | 0.2156         |
| Mental health                                                   | 3.36                   | 0.4991         |
| <b>Subgroup analyses based on different specific treatments</b> |                        |                |
| Depression                                                      | 8.79                   | 0.9645         |
| Anxiety                                                         | 3.67                   | 0.9785         |
| Mental health                                                   | 1.15                   | 0.7649         |

**Appendix 31. Node-splitting method in comparison between direct and indirect evidence of different categories of interventions for depression**

| Comparison | Direct Effect |                | Indirect Effect |                | Difference |                | P value | tau       |
|------------|---------------|----------------|-----------------|----------------|------------|----------------|---------|-----------|
|            | Estimate      | Standard error | Estimate        | Standard error | Estimate   | Standard error |         |           |
| CO vs. EX  | -0.2238785    | 0.191136       | -0.1912688      | 0.2788397      | -0.0326097 | 0.3386809      | 0.923   | 0.4135227 |
| CO vs. EDU | -0.2636933    | 0.2347405      | 0.0030666       | 0.4703508      | -0.26676   | 0.5254906      | 0.612   | 0.4136125 |
| CO vs. BA  | -0.429138     | 0.1656994      | -0.3291986      | 0.3355936      | -0.0999395 | 0.3743801      | 0.790   | 0.4150547 |
| CO vs. MUI | -0.1393617    | 0.1997302      | -0.5853901      | 0.3465948      | 0.4460284  | 0.4001083      | 0.265   | 0.4072815 |
| CO vs. PT  | -0.2565262    | 0.128129       | -0.2860057      | 0.3935137      | 0.0294795  | 0.4138499      | 0.943   | 0.4127692 |
| EX vs. BA  | 0.2305791     | 0.3483616      | -0.3952676      | 0.2395163      | 0.6258467  | 0.4230191      | 0.139   | 0.4008367 |
| EX vs. MUI | -0.2213455    | 0.297895       | 0.1350992       | 0.2887244      | -0.3564447 | 0.4146473      | 0.390   | 0.4077096 |
| EX vs. PT  | -0.1277523    | 0.2785884      | 0.013109        | 0.236638       | -0.1408613 | 0.3657513      | 0.700   | 0.4129977 |
| EDU vs. BA | -0.3893887    | 0.4440518      | -0.1226291      | 0.2809961      | -0.2667596 | 0.525491       | 0.612   | 0.4136127 |
| BA vs. MUI | 0.0691692     | 0.5454251      | 0.1748182       | 0.2397463      | -0.105649  | 0.5959014      | 0.859   | 0.4131381 |
| MUI vs. PT | 0.9598683     | 0.5959836      | -0.132617       | 0.2115876      | 1.092485   | 0.6324493      | 0.084   | 0.3951604 |

**Notes: P>0.05 indicates that indirect comparisons were consistent with direct comparisons.**

Appendix 32. Node-splitting method in comparison between direct and indirect evidence of different categories of interventions for anxiety

| Comparison | Direct Effect |                | Indirect Effect |                | Difference |                | P value | tau       |
|------------|---------------|----------------|-----------------|----------------|------------|----------------|---------|-----------|
|            | Estimate      | Standard error | Estimate        | Standard error | Estimate   | Standard error |         |           |
| CO vs. EX  | -0.291343     | 0.3004364      | 0.3604447       | 0.3758668      | -0.6517877 | 0.4827641      | 0.177   | 0.3776345 |
| CO vs. EDU | -0.5481524    | 0.2700621      | -0.131147       | 0.4588453      | -0.4170054 | 0.5326988      | 0.434   | 0.3907254 |
| CO vs. BA  | -0.4536069    | 0.1875453      | -0.5610049      | 0.4621838      | 0.1073979  | 0.5005185      | 0.830   | 0.4078321 |
| CO vs. MUI | -0.3967749    | 0.2312431      | -0.9050779      | 0.5559385      | 0.508303   | 0.6023378      | 0.399   | 0.3971664 |
| CO vs. PT  | 0.3097422     | 0.3674924      | -0.2074823      | 0.4395846      | 0.5172245  | 0.5732524      | 0.367   | 0.383523  |
| EX vs. BA  | 0.0356357     | 0.4338997      | -0.7247304      | 0.3511723      | 0.760366   | 0.5595704      | 0.174   | 0.3841477 |
| EX vs. MUI | -0.5369577    | 0.3561926      | -0.3042274      | 0.4410474      | -0.2327303 | 0.5633674      | 0.680   | 0.4040809 |
| EX vs. PT  | -0.3355244    | 0.3889144      | 0.7033601       | 0.4214818      | -1.038885  | 0.5715559      | 0.069   | 0.3446975 |
| EDU vs. BA | -0.2883337    | 0.4225842      | 0.1286711       | 0.3243312      | -0.4170048 | 0.5326989      | 0.434   | 0.3907253 |
| MUI vs. PT | 1.31032       | 0.5925849      | 0.2750461       | 0.3710412      | 1.035274   | 0.6991315      | 0.139   | 0.3721446 |

Notes: P>0.05 indicates that indirect comparisons were consistent with direct comparisons.

**Appendix 33. Node-splitting method in comparison between direct and indirect evidence of different categories of interventions for mental health**

| Comparison | Direct Effect |                | Indirect Effect |                | Difference |                | P value | tau       |
|------------|---------------|----------------|-----------------|----------------|------------|----------------|---------|-----------|
|            | Estimate      | Standard error | Estimate        | Standard error | Estimate   | Standard error |         |           |
| CO vs. EX  | 0.5480893     | 0.2799529      | 1.137774        | 0.9171429      | -0.5896843 | 0.9589408      | 0.539   | 0.6103202 |
| CO vs. MUI | 0.5973917     | 0.3164986      | 2.287184        | 0.9731859      | -1.689792  | 1.023408       | 0.099   | 0.5557674 |
| CO vs. PT  | 0.4789188     | 0.2376082      | 0.2024246       | 1.338763       | 0.2764941  | 1.360019       | 0.839   | 0.6103269 |
| EX vs. MUI | 0.4570806     | 0.4449786      | -0.2984623      | 0.5676288      | 0.7555429  | 0.7216117      | 0.295   | 0.5808482 |
| EX vs. PT  | -0.4827968    | 0.6853875      | -0.0155989      | 0.3864681      | -0.4671979 | 0.786849       | 0.553   | 0.6040267 |

**Notes: P>0.05 indicates that indirect comparisons were consistent with direct comparisons.**

**Appendix 34. Subgroup analysis of node-splitting method in comparison between direct and indirect evidence of specific treatments for depression**

| Comparison | Direct Effect |                | Indirect Effect |                | Difference |                | P value | tau       |
|------------|---------------|----------------|-----------------|----------------|------------|----------------|---------|-----------|
|            | Estimate      | Standard error | Estimate        | Standard error | Estimate   | Standard error |         |           |
| A C        | -0.1187627    | 0.3339613      | -0.3101126      | 0.4797917      | 0.1913498  | 0.584577       | 0.743   | 0.4781059 |
| A F        | -0.0775088    | 0.5202451      | -0.1533492      | 0.3849653      | 0.0758404  | 0.647973       | 0.907   | 0.4817116 |
| A G        | -1.366394     | 0.3224237      | -0.9677237      | 0.4229854      | -0.3986701 | 0.5312485      | 0.453   | 0.4760746 |
| A H        | -1.018301     | 0.541138       | 0.038676        | 0.2975878      | -1.056977  | 0.6175669      | 0.087   | 0.4488797 |
| A I        | 0.112371      | 0.399749       | 0.0193135       | 0.6257298      | 0.0930575  | 0.7425004      | 0.900   | 0.4799346 |
| A J        | 0.0897105     | 0.5150758      | -0.598249       | 0.2720819      | 0.6879594  | 0.5824498      | 0.238   | 0.4676164 |
| A K        | -0.3821205    | 0.4008368      | -0.4205949      | 0.3476918      | 0.0384745  | 0.5307183      | 0.942   | 0.4809887 |
| A M        | 0.0548346     | 0.3609403      | -0.4453897      | 0.2988508      | 0.5002243  | 0.4686132      | 0.286   | 0.4699636 |
| A N        | -0.5459869    | 0.5777401      | -0.8401922      | 0.496787       | 0.2942054  | 0.7619587      | 0.699   | 0.4792416 |
| A P        | -0.4179627    | 0.5716158      | 0.0923597       | 0.3666249      | -0.5103224 | 0.6790865      | 0.452   | 0.4736406 |
| B C        | -0.5815219    | 0.645387       | -0.0717042      | 0.3427487      | -0.5098177 | 0.7307537      | 0.485   | 0.4742472 |
| B F        | -0.3760667    | 0.5152398      | 0.0038979       | 0.3789481      | -0.3799646 | 0.6401908      | 0.553   | 0.4779912 |
| B G        | -1.037162     | 0.3632355      | -1.43583        | 0.3892946      | 0.3986678  | 0.5312489      | 0.453   | 0.4760746 |
| B H        | -0.064234     | 0.2974923      | -0.4716911      | 0.3940257      | 0.4074571  | 0.4936825      | 0.409   | 0.4766075 |
| B I        | 0.023751      | 0.590255       | 0.1168085       | 0.4504487      | -0.0930575 | 0.7424992      | 0.900   | 0.4799331 |
| B J        | -0.7604885    | 0.3193596      | -0.1923802      | 0.2904951      | -0.5681083 | 0.4318811      | 0.188   | 0.4726315 |
| B K        | -0.3136883    | 0.5552685      | -0.4328527      | 0.2927825      | 0.1191644  | 0.6277299      | 0.849   | 0.4807849 |
| B L        | -0.3599981    | 0.3831835      | 0.0049272       | 452.6905       | -0.3649252 | 452.6907       | 0.999   | 0.4697358 |
| B M        | -0.2641326    | 0.2951732      | -0.223504       | 0.3329853      | -0.0406287 | 0.444907       | 0.927   | 0.4812289 |
| B N        | -0.5372583    | 0.5518664      | -0.8686697      | 0.5041027      | 0.3314114  | 0.7474464      | 0.657   | 0.4790435 |
| B O        | -0.373402     | 0.3985252      | 0.0041624       | 453.037        | -0.3775644 | 453.0371       | 0.999   | 0.4697358 |
| B P        | 0.0067436     | 0.3399792      | -0.2045961      | 0.5036485      | 0.2113397  | 0.6076519      | 0.728   | 0.478236  |
| C E        | -0.3932297    | 0.6335684      | 0.5210328       | 0.6525707      | -.9142625  | 0.9054262      | 0.313   | 0.4710477 |
| C F        | 0.2566499     | 0.6242505      | -0.0485434      | 0.4453395      | 0.3051933  | 0.7668497      | 0.691   | 0.4777596 |
| D J        | 0.3475354     | 0.6066204      | -0.5194874      | 0.6806421      | 0.8670229  | 0.9111296      | 0.341   | 0.472892  |
| D M        | 0.3897667     | 0.5969657      | -0.1186772      | 0.684615       | 0.5084438  | 0.9030627      | 0.573   | 0.477009  |
| D N        | -0.7538736    | 0.6347555      | 0.2038414       | 0.67107        | -0.9577151 | 0.923715       | 0.300   | 0.4706312 |
| E F        | 0.6785635     | 0.6349095      | -0.6743338      | 0.6349873      | 1.352897   | 0.8952597      | 0.131   | 0.4603151 |
| E M        | -0.9525685    | 0.6143637      | 0.6494272       | 0.5829833      | -1.601996  | 0.8496062      | 0.059   | 0.4492131 |
| E Q        | -0.0221164    | 0.63479        | 0.7238256       | 0.8651093      | -0.7459421 | 1.072586       | 0.487   | 0.4756612 |
| F J        | 0.1565691     | 0.5105287      | -0.6418802      | 0.418972       | 0.7984492  | 0.6613809      | 0.227   | 0.4688523 |
| F M        | -0.218787     | 0.5161632      | -0.0518867      | 0.4117684      | -0.1669004 | 0.6605774      | 0.801   | 0.4804247 |
| H J        | -0.2667128    | 0.5167824      | -0.2297135      | 0.3428007      | -0.0369993 | 0.6200116      | 0.952   | 0.4823375 |
| H K        | -0.5066013    | 0.5098171      | -0.0223149      | 0.3783681      | -0.4842865 | 0.634795       | 0.446   | 0.4751468 |
| J K        | 0.0455167     | 0.3227253      | 0.0493795       | 0.4124058      | -0.0038628 | 0.523531       | 0.994   | 0.4811065 |
| J M        | 0.0614462     | 0.5974452      | 0.2454279       | 0.3038233      | -0.1839816 | 0.6702738      | 0.784   | 0.4795692 |
| M Q        | 0.9596908     | 0.6446798      | -0.1978456      | 0.6104481      | 1.157536   | 0.8876927      | 0.192   | 0.4653671 |
| P Q        | 0.0102025     | 0.544999       | 0.4141067       | 0.6927936      | -0.4039041 | 0.8814686      | 0.647   | 0.4775536 |

Notes: P>0.05 indicates that indirect comparisons were consistent with direct comparisons.

**Appendix 35. Subgroup analysis of node-splitting method in comparison between direct and indirect evidence of specific treatments for anxiety**

| Comparison | Direct Effect |                | Indirect Effect |                | Difference |                | P value | tau       |
|------------|---------------|----------------|-----------------|----------------|------------|----------------|---------|-----------|
|            | Estimate      | Standard error | Estimate        | Standard error | Estimate   | Standard error |         |           |
| A C        | -0.1224938    | 0.4320651      | -0.280588       | 0.4381323      | 0.1580942  | 0.6163628      | 0.798   | 0.3847667 |
| A D        | -1.35642      | 0.3189225      | -1.070323       | 0.6081138      | -0.2860963 | 0.6867321      | 0.677   | 0.3737378 |
| A E        | -0.736011     | 0.4519664      | -0.0776149      | 0.3089136      | -0.6583961 | 0.5474497      | 0.229   | 0.3439325 |
| A F        | 0.1299983     | 0.5003774      | 0.0070849       | 0.5668196      | 0.1229134  | 0.7560833      | 0.871   | 0.3767443 |
| A G        | -0.0795166    | 0.429154       | -0.586788       | 0.3312875      | 0.5072713  | 0.5421307      | 0.349   | 0.3708672 |
| A H        | -0.273675     | 0.4476622      | -0.3997602      | 0.3522271      | 0.1260852  | 0.5696186      | 0.825   | 0.3827963 |
| A J        | -0.203502     | 0.4281667      | -0.3573732      | 0.3461043      | 0.1538712  | 0.5505587      | 0.780   | 0.3822187 |
| B C        | -0.4486656    | 0.4306896      | -0.4013693      | 0.398868       | -0.0472963 | 0.588028       | 0.936   | 0.3851077 |
| B D        | -1.329564     | 0.5549841      | -1.615659       | 0.404467       | 0.2860953  | 0.6867321      | 0.677   | 0.3737375 |
| B E        | -0.4659063    | 0.3214927      | -0.5731048      | 0.3657198      | 0.1071985  | 0.4884363      | 0.826   | 0.3861141 |
| B F        | -0.2019456    | 0.5105776      | -0.0790327      | 0.5576506      | -0.1229129 | 0.7560844      | 0.871   | 0.3767452 |
| B G        | -1.042815     | 0.3623172      | -0.2929674      | 0.3041754      | -0.749848  | 0.4768134      | 0.116   | 0.370314  |
| B H        | 4.82e-09      | 0.4302436      | -0.8156992      | 0.2880296      | 0.8156992  | 0.5177554      | 0.115   | 0.3300911 |
| B I        | -0.4219795    | 0.3159586      | -0.4498736      | 438.4633       | 0.0278941  | 438.4634       | 1.000   | 0.3547302 |
| B J        | -0.4713069    | 0.2647804      | -0.6514341      | 0.4431331      | 0.1801272  | 0.5169522      | 0.728   | 0.3834386 |
| B K        | 0.1881408     | 0.5652564      | 1.097152        | 0.789656       | -0.9090115 | 0.9711186      | 0.349   | 0.3570957 |
| C G        | 0.0333105     | 0.4275759      | -0.4653245      | 0.4548861      | 0.498635   | 0.6256702      | 0.425   | 0.3769553 |
| C J        | -0.2770016    | 0.4204469      | 0.1096346       | 0.4503956      | -0.3866362 | 0.6166988      | 0.531   | 0.3755956 |
| E G        | -0.1940303    | 0.422491       | -0.0572033      | 0.3643732      | -0.136827  | 0.5577467      | 0.806   | 0.3797101 |
| E H        | -0.377868     | 0.3858067      | 0.2228328       | 0.3666633      | -0.6007008 | 0.532197       | 0.259   | 0.3391534 |
| G H        | -0.2039824    | 0.3309461      | 0.4390628       | 0.4193957      | -0.6430451 | 0.534818       | 0.229   | 0.3681215 |
| J L        | 1.520689      | 0.6146844      | 0.6116661       | 0.7518215      | 0.9090232  | 0.9711192      | 0.349   | 0.3570958 |
| K L        | -0.0466125    | 0.4432879      | 0.8624075       | 0.8640447      | -0.90902   | 0.9711217      | 0.349   | 0.3570969 |

**Notes: P>0.05 indicates that indirect comparisons were consistent with direct comparisons.**

**Appendix 36. Subgroup analysis of node-splitting method in comparison between direct and indirect evidence of specific treatments for mental health**

| Comparison | Direct Effect |                | Indirect Effect |                | Difference |                | P value | tau       |
|------------|---------------|----------------|-----------------|----------------|------------|----------------|---------|-----------|
|            | Estimate      | Standard error | Estimate        | Standard error | Estimate   | Standard error |         |           |
| A C        | 1.030816      | 0.4284866      | 0.733404        | 0.8691058      | 0.2974119  | 0.9690528      | 0.759   | 0.6413474 |
| A D        | 0.5650587     | 0.7038773      | 0.9168649       | 0.6960842      | -0.3518062 | 0.9899376      | 0.722   | 0.6405067 |
| A E        | 0.6098802     | 0.5026667      | 0.5649154       | 0.919646       | 0.0449648  | 1.047919       | 0.966   | 0.6456217 |
| B C        | -0.0398366    | 0.6804095      | 0.8038627       | 0.6353822      | -0.8436993 | 0.9317061      | 0.365   | 0.6160116 |
| B D        | 0.2370128     | 0.3881662      | -0.1148047      | 0.9106589      | 0.3518174  | 0.9899402      | 0.722   | 0.6405068 |
| B E        | 0.0178501     | 0.7313605      | 0.0628118       | 0.7504985      | -0.0449617 | 1.04792        | 0.966   | 0.6456215 |
| B F        | 0.4209494     | 0.4692919      | -1.120004       | 446.8165       | 1.540954   | 446.8168       | 0.997   | 0.6063533 |
| B G        | 0.6275435     | 0.3571406      | 1.222298        | 1.904698       | -0.5947543 | 1.938101       | 0.759   | 0.641347  |
| C G        | 0.0189256     | 0.7023984      | 0.5177156       | 0.804975       | -0.49879   | 1.068622       | 0.641   | 0.6416349 |

**Notes: P>0.05 indicates that indirect comparisons were consistent with direct comparisons.**

**Appendix 37. Evaluation of inconsistency using loop-specific heterogeneity estimates of different categories of interventions for depression**

| <b>Loop</b> | <b>IF</b> | <b>seIF</b> | <b>Z value</b> | <b>P value</b> | <b>95%CI</b> | <b>tau2</b> |
|-------------|-----------|-------------|----------------|----------------|--------------|-------------|
| CO-MUI-PT   | 1.071     | 0.515       | 2.080          | 0.038          | (0.06,2.08)  | 0.039       |
| EX-MUI-PT   | 0.892     | 0.947       | 0.942          | 0.346          | (0.00,2.75)  | 0.305       |
| EX-BA-MUI   | 0.600     | 0.434       | 1.381          | 0.167          | (0.00,1.45)  | <0.001      |
| CO-EX-BA    | 0.474     | 0.354       | 1.338          | 0.181          | (0.00,1.17)  | 0.057       |
| CO-EX-MUI   | 0.237     | 0.263       | 0.901          | 0.368          | (0.00,0.75)  | 0.024       |
| CO-EDU-BA   | 0.225     | 0.590       | 0.382          | 0.703          | (0.00,1.38)  | 0.131       |
| CO-BA-MUI   | 0.217     | 0.629       | 0.344          | 0.731          | (0.00,1.45)  | 0.095       |
| CO-EX-PT    | 0.036     | 0.255       | 0.140          | 0.889          | (0.00,0.54)  | 0.030       |

**Notes: P>0.05 indicates that no inconsistency in the closed loop.**



**Appendix 38. Evaluation of inconsistency using loop-specific heterogeneity estimates of different categories of interventions for anxiety**

| <b>Loop</b> | <b>IF</b> | <b>seIF</b> | <b>Z value</b> | <b>P value</b> | <b>95%CI</b> | <b>tau2</b> |
|-------------|-----------|-------------|----------------|----------------|--------------|-------------|
| EX-MUI-PT   | 1.861     | 0.658       | 2.829          | 0.005          | (0.57,3.15)  | 0.000       |
| CO-EX-PT    | 0.916     | 0.582       | 1.574          | 0.116          | (0.00,2.06)  | 0.073       |
| CO-MUI-PT   | 0.572     | 0.533       | 1.073          | 0.283          | (0.00,1.62)  | 0.002       |
| CO-EX-MUI   | 0.433     | 0.267       | 1.622          | 0.105          | (0.00,0.96)  | 0.003       |
| CO-EDU-BA   | 0.369     | 0.780       | 0.473          | 0.636          | (0.00,1.90)  | 0.209       |
| CO-EX-BA    | 0.294     | 0.900       | 0.326          | 0.744          | (0.00,2.06)  | 0.217       |

**Notes: p>0.05 indicates that no inconsistency in the closed loop.**

**Appendix 39. Evaluation of inconsistency using loop-specific heterogeneity estimates of different categories of interventions for mental health**

| <b>Loop</b> | <b>IF</b> | <b>seIF</b> | <b>Z value</b> | <b>P value</b> | <b>95%CI</b> | <b>tau2</b> |
|-------------|-----------|-------------|----------------|----------------|--------------|-------------|
| CO-EX-MUI   | 0.722     | 0.711       | 1.016          | 0.310          | (0.00,2.12)  | 0.307       |
| CO-EX-PT    | 0.483     | 0.803       | 0.601          | 0.548          | (0.00,2.06)  | 0.266       |

**Notes:  $p > 0.05$  indicates that no inconsistency in the closed loop.**

**Appendix 40. Subgroup analysis of evaluation of inconsistency using loop-specific heterogeneity estimates of specific treatments for depression**

| <b>Loop</b> | <b>IF</b> | <b>seIF</b> | <b>Z value</b> | <b>P value</b> | <b>95%CI</b> | <b>tau2</b> |
|-------------|-----------|-------------|----------------|----------------|--------------|-------------|
| B-C-E-M     | 1.706     | 0.870       | 1.961          | 0.050          | (0.00,3.41)  | 0.039       |
| A-C-E-M     | 1.539     | 0.641       | 2.401          | 0.016          | (0.28,2.80)  | 0.000       |
| A-M-P-Q     | 1.413     | 0.625       | 2.263          | 0.024          | (0.19,2.64)  | 0.000       |
| A-B-C-H     | 1.399     | 0.570       | 2.454          | 0.014          | (0.28,2.52)  | 0.000       |
| B-D-J-N     | 1.385     | 1.936       | 0.715          | 0.474          | (0.00,5.18)  | 0.375       |
| A-H-J       | 1.377     | 0.415       | 3.317          | 0.001          | (0.56,2.19)  | 0.000       |
| A-B-G-J     | 1.333     | 1.589       | 0.839          | 0.401          | (0.00,4.45)  | 0.837       |
| A-B-F-H     | 1.244     | 0.417       | 2.983          | 0.003          | (0.43,2.06)  | 0.000       |
| A-B-H-M     | 1.238     | 0.406       | 3.050          | 0.002          | (0.44,2.03)  | 0.014       |
| A-H-K       | 1.091     | 0.406       | 2.688          | 0.007          | (0.30,1.89)  | 0.000       |
| A-B-H-I     | 0.999     | 0.720       | 1.388          | 0.165          | (0.00,2.41)  | 0.047       |
| A-B-C-P     | 0.978     | 0.603       | 1.622          | 0.105          | (0.00,2.16)  | 0.000       |
| A-B-J-N     | 0.920     | 1.832       | 0.502          | 0.616          | (0.00,4.51)  | 0.375       |
| A-B-C-G     | 0.815     | 1.400       | 0.582          | 0.561          | (0.00,3.56)  | 0.822       |
| A-B-I-J     | 0.811     | 1.532       | 0.529          | 0.597          | (0.00,3.81)  | 0.371       |
| A-B-F-P     | 0.769     | 0.666       | 1.154          | 0.249          | (0.00,2.08)  | 0.069       |
| A-B-F-G     | 0.663     | 1.896       | 0.350          | 0.726          | (0.00,4.38)  | 1.285       |
| A-B-G-M     | 0.663     | 1.075       | 0.616          | 0.538          | (0.00,2.77)  | 0.383       |
| B-M-P-Q     | 0.641     | 0.673       | 0.953          | 0.341          | (0.00,1.96)  | 0.045       |
| A-B-G-H     | 0.608     | 1.350       | 0.450          | 0.653          | (0.00,3.25)  | 0.478       |
| B-F-J       | 0.604     | 1.480       | 0.408          | 0.683          | (0.00,3.50)  | 0.375       |
| A-B-C-K     | 0.583     | 0.586       | 0.995          | 0.320          | (0.00,1.73)  | 0.000       |
| A-D-M-N     | 0.562     | 0.659       | 0.853          | 0.394          | (0.00,1.85)  | 0.000       |
| H-J-K       | 0.531     | 0.341       | 1.558          | 0.119          | (0.00,1.20)  | 0.000       |
| A-J-K       | 0.523     | 0.447       | 1.169          | 0.242          | (0.00,1.40)  | 0.048       |
| A-B-C-N     | 0.472     | 0.637       | 0.740          | 0.459          | (0.00,1.72)  | 0.000       |
| A-B-G-I     | 0.468     | 1.613       | 0.290          | 0.772          | (0.00,3.63)  | 1.072       |
| A-D-J-N     | 0.465     | 0.690       | 0.674          | 0.500          | (0.00,1.82)  | 0.000       |
| A-B-H-P     | 0.442     | 0.517       | 0.854          | 0.393          | (0.00,1.45)  | 0.009       |
| A-B-F-K     | 0.427     | 0.438       | 0.975          | 0.330          | (0.00,1.29)  | 0.000       |
| B-J-K       | 0.412     | 0.943       | 0.437          | 0.662          | (0.00,2.26)  | 0.245       |
| A-B-C-I     | 0.406     | 0.776       | 0.523          | 0.601          | (0.00,1.93)  | 0.075       |
| A-B-K-M     | 0.400     | 0.447       | 0.894          | 0.371          | (0.00,1.28)  | 0.022       |
| A-B-C-J     | 0.384     | 1.189       | 0.323          | 0.746          | (0.00,2.71)  | 0.215       |
| A-F-M       | 0.338     | 0.307       | 1.101          | 0.271          | (0.00,0.94)  | 0.000       |
| A-B-F-N     | 0.316     | 0.505       | 0.626          | 0.531          | (0.00,1.31)  | 0.000       |
| A-B-F-I     | 0.305     | 0.486       | 0.628          | 0.530          | (0.00,1.26)  | 0.000       |
| A-B-G-K     | 0.300     | 1.547       | 0.194          | 0.846          | (0.00,3.33)  | 0.993       |

|         |       |       |       |       |             |       |
|---------|-------|-------|-------|-------|-------------|-------|
| A-B-I-M | 0.256 | 0.647 | 0.395 | 0.693 | (0.00,1.52) | 0.063 |
| A-C-F   | 0.219 | 0.485 | 0.451 | 0.652 | (0.00,1.17) | 0.000 |
| A-B-C-M | 0.179 | 0.525 | 0.342 | 0.733 | (0.00,1.21) | 0.009 |
| A-J-M   | 0.097 | 0.440 | 0.221 | 0.825 | (0.00,0.96) | 0.000 |
| B-C-F   | 0.063 | 0.625 | 0.101 | 0.919 | (0.00,1.29) | 0.000 |
| A-B-G-P | 0.046 | 1.423 | 0.032 | 0.974 | (0.00,2.83) | 0.895 |

**Notes:  $p > 0.05$  indicates that no inconsistency in the closed loop.**

**Appendix 41. Subgroup analysis of evaluation of inconsistency using loop-specific heterogeneity estimates of specific treatments for anxiety**

| <b>Loop</b> | <b>IF</b> | <b>seIF</b> | <b>Z value</b> | <b>P value</b> | <b>95%CI</b> | <b>tau2</b> |
|-------------|-----------|-------------|----------------|----------------|--------------|-------------|
| B-G-H       | 1.517     | 1.365       | 1.111          | 0.266          | (0.00,4.19)  | 0.724       |
| A-B-D-G     | 1.239     | 1.727       | 0.718          | 0.473          | (0.00,4.62)  | 0.605       |
| B-J-K-L     | 0.876     | 0.748       | 1.171          | 0.242          | (0.00,2.34)  | 0.009       |
| A-B-G-J     | 0.863     | 1.280       | 0.675          | 0.500          | (0.00,3.37)  | 0.330       |
| A-E-G       | 0.852     | 0.409       | 2.086          | 0.037          | (0.05,1.65)  | 0.000       |
| A-E-H       | 0.840     | 0.417       | 2.015          | 0.044          | (0.02,1.66)  | 0.000       |
| B-E-G       | 0.665     | 1.452       | 0.458          | 0.647          | (0.00,3.51)  | 0.719       |
| A-B-C-H     | 0.608     | 0.454       | 1.340          | 0.180          | (0.00,1.50)  | 0.000       |
| A-B-H-J     | 0.573     | 0.465       | 1.233          | 0.218          | (0.00,1.48)  | 0.009       |
| A-B-E-J     | 0.533     | 0.663       | 0.804          | 0.422          | (0.00,1.83)  | 0.094       |
| A-B-C-E     | 0.533     | 0.435       | 1.225          | 0.221          | (0.00,1.39)  | 0.000       |
| A-B-E-F     | 0.530     | 0.584       | 0.908          | 0.364          | (0.00,1.67)  | 0.000       |
| A-B-C-D     | 0.347     | 0.525       | 0.661          | 0.509          | (0.00,1.38)  | 0.000       |
| A-B-D-F     | 0.344     | 0.654       | 0.527          | 0.598          | (0.00,1.63)  | 0.000       |
| A-B-D-J     | 0.309     | 0.565       | 0.547          | 0.584          | (0.00,1.42)  | 0.022       |
| A-B-D-H     | 0.261     | 0.574       | 0.455          | 0.649          | (0.00,1.39)  | 0.000       |
| A-B-F-G     | 0.253     | 0.549       | 0.460          | 0.646          | (0.00,1.33)  | 0.000       |
| B-C-G       | 0.250     | 0.326       | 0.768          | 0.442          | (0.00,0.89)  | 0.000       |
| A-B-D-E     | 0.244     | 0.891       | 0.274          | 0.784          | (0.00,1.99)  | 0.160       |
| A-C-J       | 0.191     | 0.334       | 0.573          | 0.567          | (0.00,0.85)  | 0.000       |
| A-B-F-J     | 0.033     | 0.560       | 0.058          | 0.953          | (0.00,1.13)  | 0.009       |
| A-G-H       | 0.003     | 0.358       | 0.009          | 0.993          | (0.00,0.70)  | 0.000       |
| A-B-C-F     | 0.003     | 0.551       | 0.005          | 0.996          | (0.00,1.08)  | 0.000       |

**Notes:  $p > 0.05$  indicates that no inconsistency in the closed loop.**

**Appendix 42. Subgroup analysis of evaluation of inconsistency using loop-specific heterogeneity estimates of specific treatments for mental health**

| <b>Loop</b> | <b>IF</b> | <b>seIF</b> | <b>Z value</b> | <b>P value</b> | <b>95%CI</b> | <b>tau2</b> |
|-------------|-----------|-------------|----------------|----------------|--------------|-------------|
| A-B-C-D     | 0.749     | 1.102       | 0.679          | 0.497          | (0.00,2.91)  | 0.250       |
| B-C-G       | 0.525     | 0.423       | 1.242          | 0.214          | (0.00,1.35)  | 0.000       |
| A-B-C-E     | 0.491     | 1.714       | 0.287          | 0.774          | (0.00,3.85)  | 0.934       |
| A-B-D-E     | 0.270     | 1.354       | 0.199          | 0.842          | (0.00,2.92)  | 0.344       |

**Notes: p>0.05 indicates that no inconsistency in the closed loop.**

**Appendix 43. Egger's test for the assessment of publication bias of pairwise meta-analysis**

| <b>Category</b> | <b>Comparison</b> | <b>Number of RCTs</b> | <b>t value</b> | <b>P value</b> |
|-----------------|-------------------|-----------------------|----------------|----------------|
| Depression      | EX vs CO          | 7                     | -0.40          | 0.707          |
| Depression      | BA vs CO          | 9                     | -1.30          | 0.235          |
| Depression      | PT vs CO          | 16                    | -0.52          | 0.611          |
| Anxiety         | BA vs CO          | 7                     | -1.39          | 0.223          |
| Mental health   | PT vs CO          | 8                     | -0.17          | 0.868          |

**Notes:  $p > 0.05$  indicates that no publication bias of pairwise meta-analysis.**

**Appendix 44. Network meta-analysis funnel plots of different categories of interventions for the assessment of publication bias for depression**

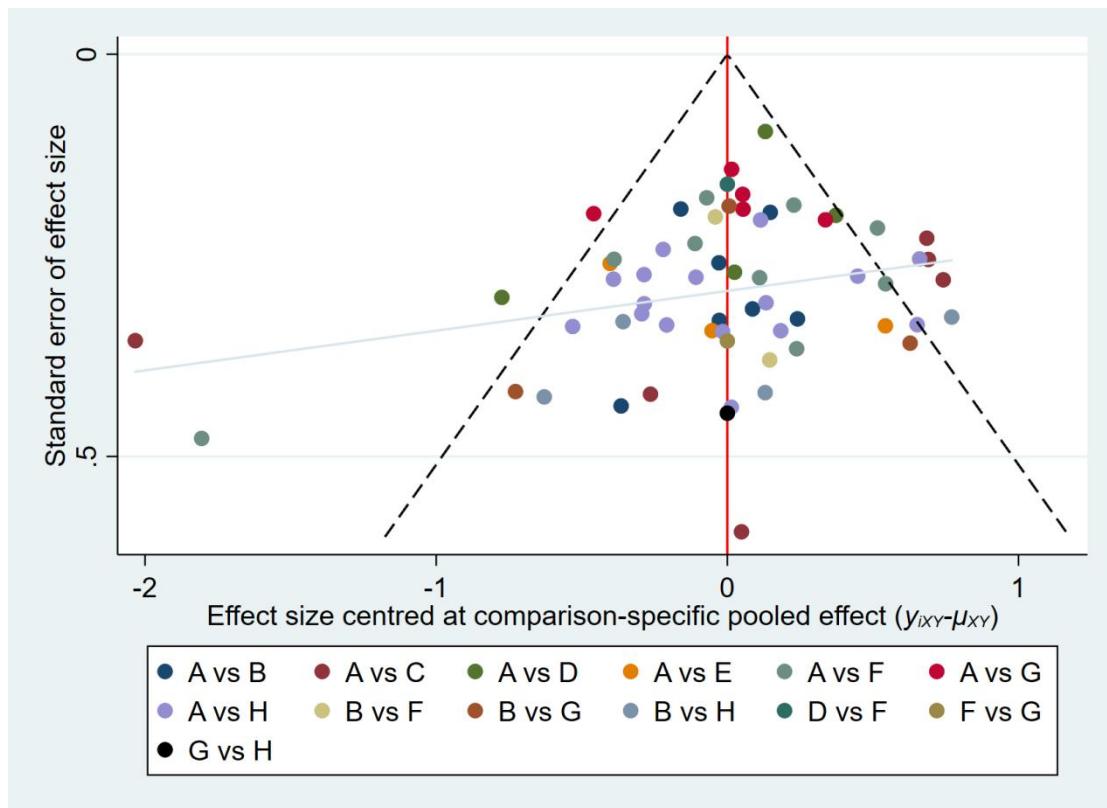



**Appendix 45. Network meta-analysis funnel plots of different categories of interventions for the assessment of publication bias for anxiety**

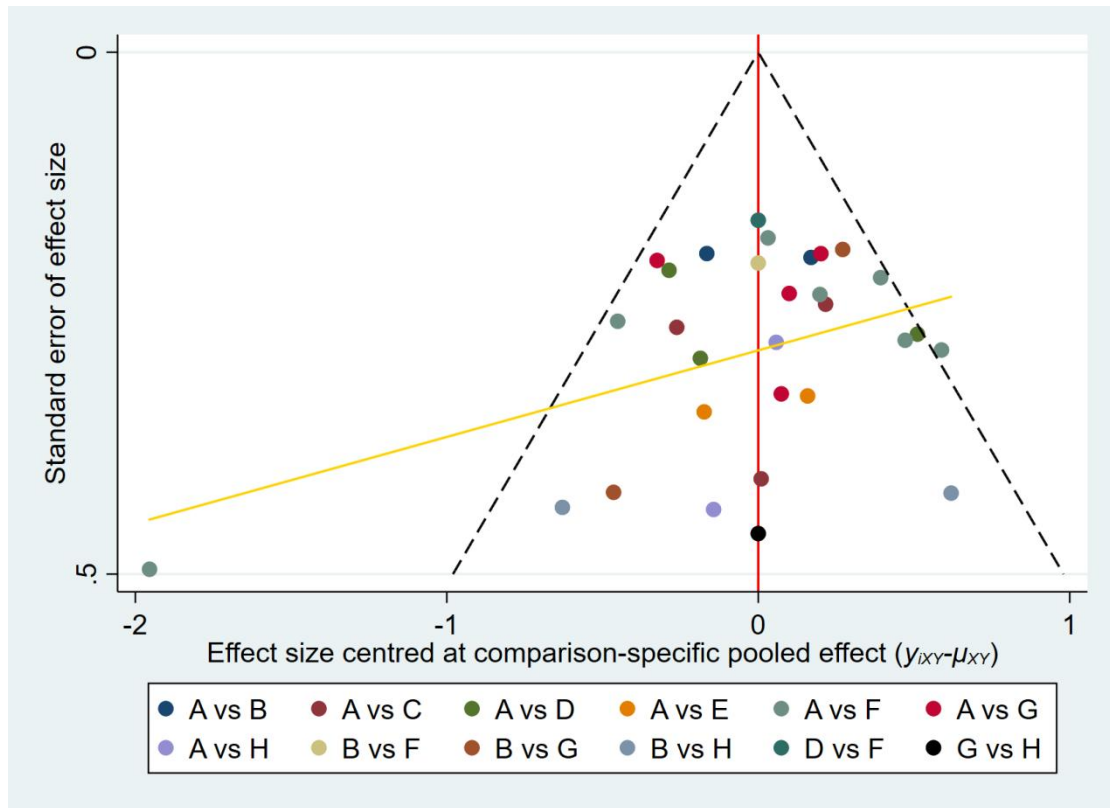

**Appendix 46. Network meta-analysis funnel plots of different categories of interventions for the assessment of publication bias for mental health**

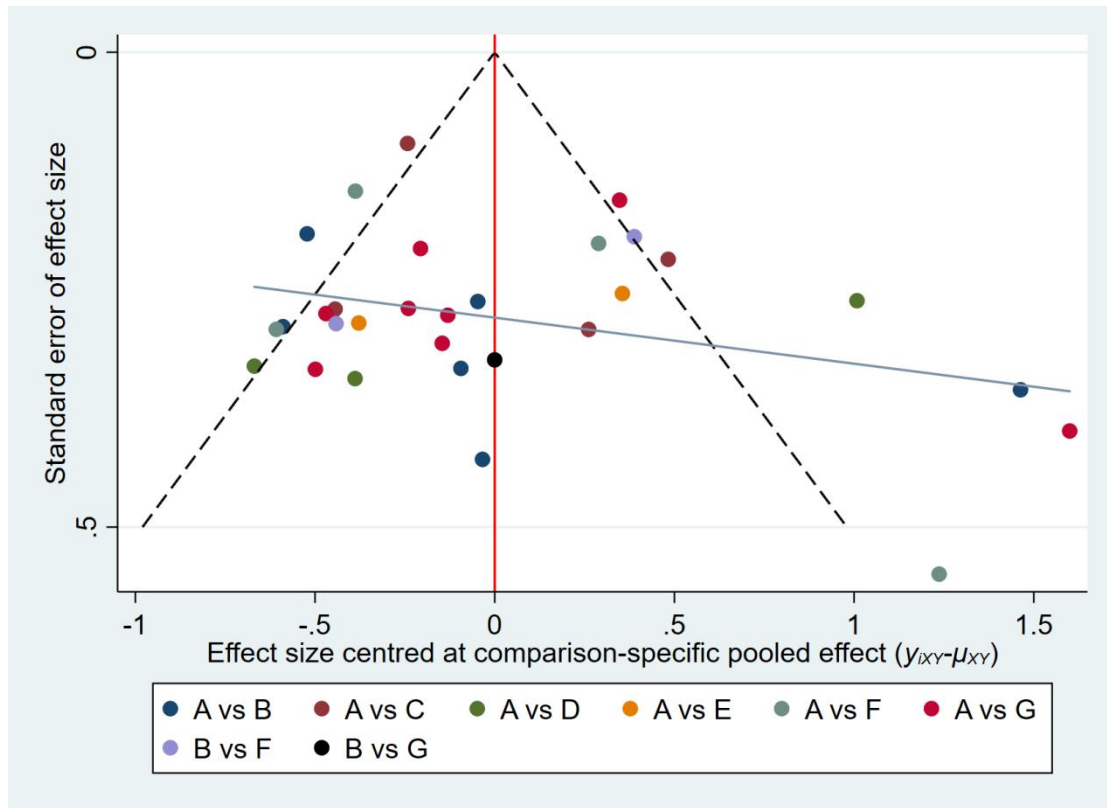

**Appendix 47. Subgroup analysis of meta-analysis funnel plots of specific treatments for the assessment of publication bias for depression**

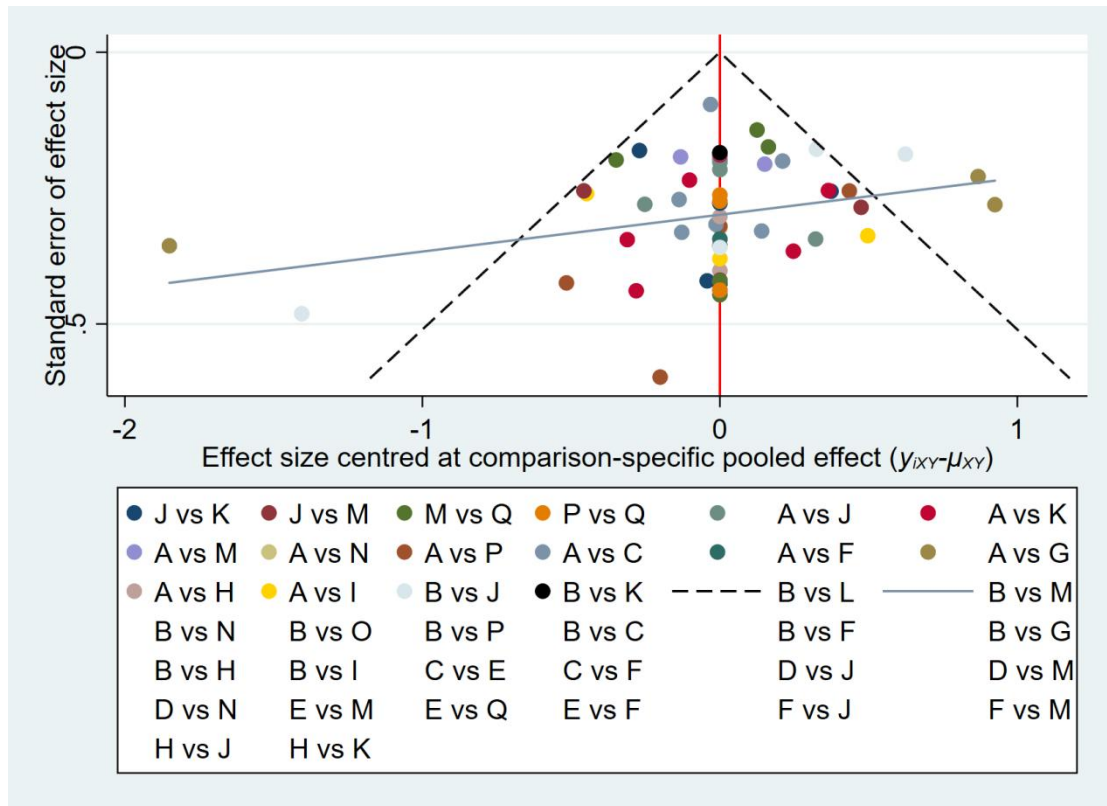

**Appendix 48. Subgroup analysis of network meta-analysis funnel plots of specific treatments for the assessment of publication bias for anxiety**

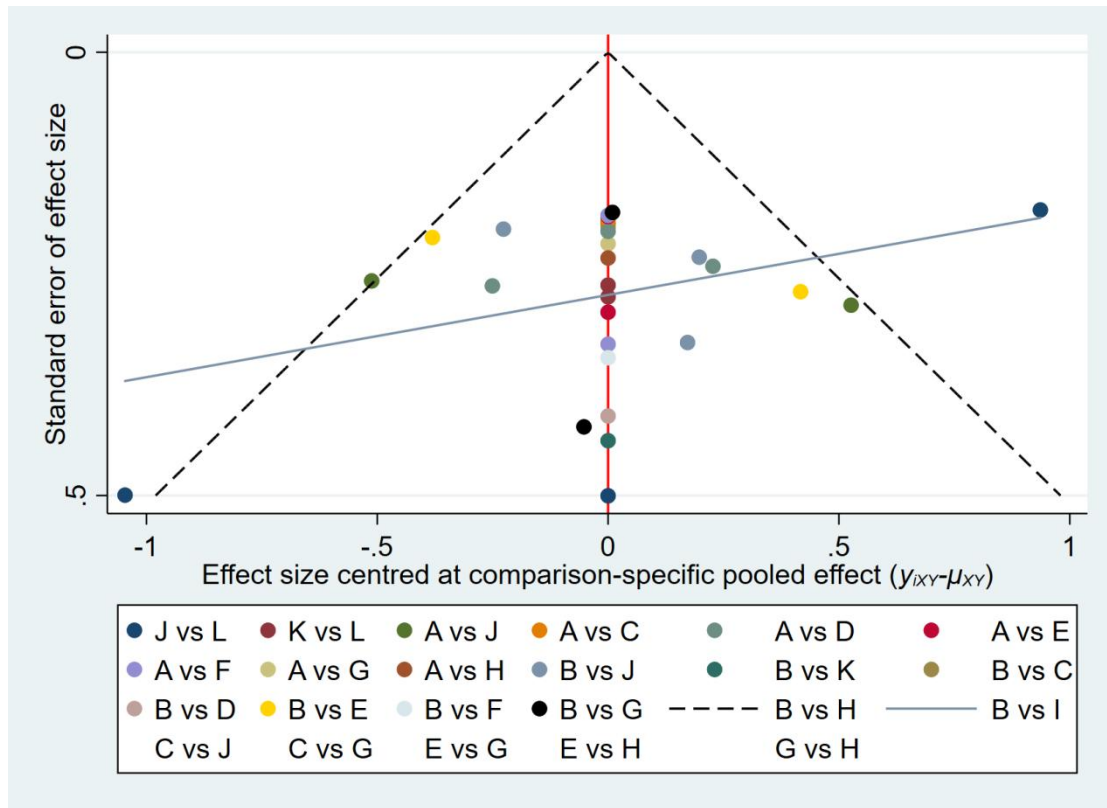

**Appendix 49. Subgroup analysis of network meta-analysis funnel plots of specific treatments for the assessment of publication bias for mental health**

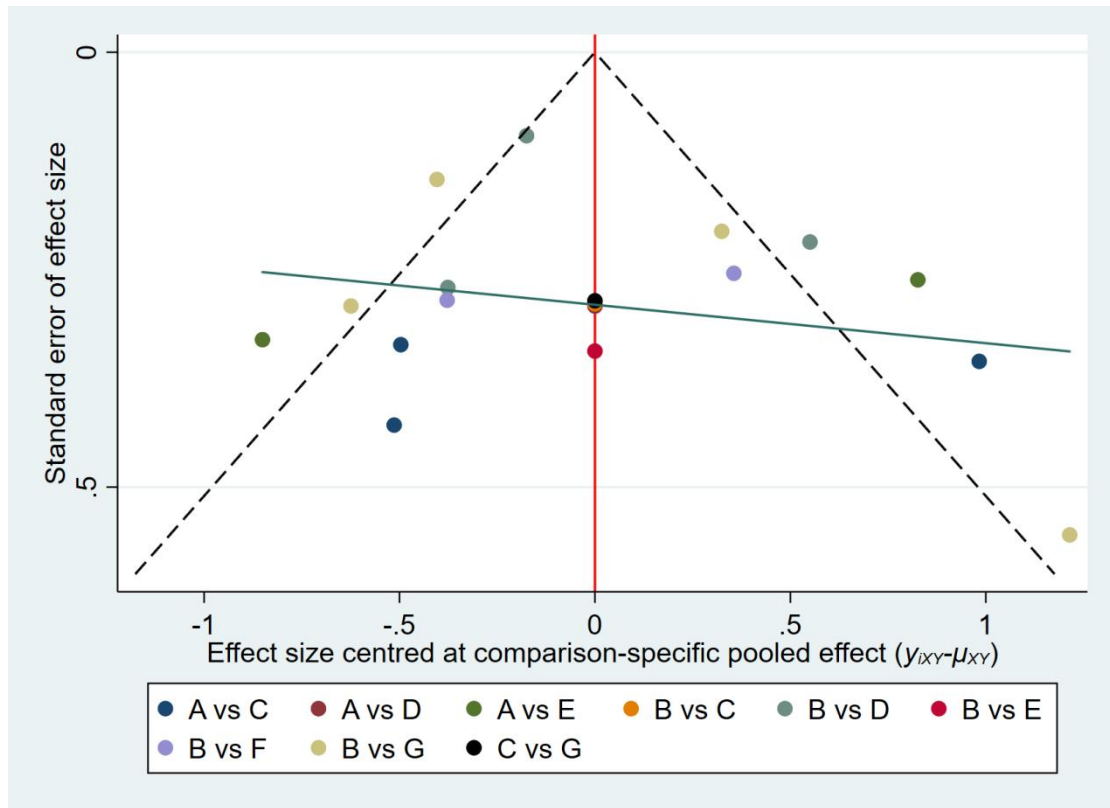

Supplement: js9-110-478-s005.pdf [file js9-110-478-s005.pdf]
